# Supplementary material
Source: publisher figshare collection journal article supplement (https://acs.figshare.com/ndownloader/files/4204135)
Supplement: Supplementary file 1 [file 4204135]

## Sheet: RPLC-CIEF identification
Accession	Description	Score	Coverage	# Proteins	# Unique Peptides	# Peptides	# PSMs	(115+116)/(113+114)	(115+116)/(113+114) Count	(115+116)/(113+114) Variability [%]	(117+118)/(113+114)	(117+118)/(113+114) Count	(117+118)/(113+114) Variability [%]	(119+121)/(113+114)	(119+121)/(113+114) Count	(119+121)/(113+114) Variability [%]	114/113	114/113 Count	114/113 Variability [%]	115/116	115/116 Count	115/116 Variability [%]	117/118	117/118 Count	117/118 Variability [%]	119/121	119/121 Count	119/121 Variability [%]	# AAs	MW [kDa]	calc. pI
P26772	10 kDa heat shock protein, mitochondrial OS=Rattus norvegicus GN=Hspe1 PE=1 SV=3 - [CH10_RAT]	46.96	11.76	1	1	1	1	0.949201	1		1.19339	1		0.908528	1		0.977214	1		0.898328	1		1.07166	1		1.05851	1		102	10.8949	8.92432
	A2	Sequence	# PSMs	# Proteins	# Protein Groups	Protein Group Accessions	Modifications	ΔCn	(115+116)/(113+114)	(115+116)/(113+114) Count	(115+116)/(113+114) Variability [%]	(117+118)/(113+114)	(117+118)/(113+114) Count	(117+118)/(113+114) Variability [%]	(119+121)/(113+114)	(119+121)/(113+114) Count	(119+121)/(113+114) Variability [%]	114/113	114/113 Count	114/113 Variability [%]	115/116	115/116 Count	115/116 Variability [%]	117/118	117/118 Count	117/118 Variability [%]	119/121	119/121 Count	119/121 Variability [%]	IonScore	Exp Value	Charge	MH+ [Da]	ΔM [ppm]	RT [min]	# Missed Cleavages
	High	vVLDDkDYFLFR	1	1	1	P26772	N-Term(iTRAQ8plex); K6(iTRAQ8plex)	0	0.949201	1		1.19339	1		0.908528	1		0.977214	1		0.898328	1		1.07166	1		1.05851	1		46.96	0.000183249	2	2138.22	4.95632	8.80861	1
P35213	14-3-3 protein beta/alpha OS=Rattus norvegicus GN=Ywhab PE=1 SV=3 - [1433B_RAT]	1287.14	22.76	1	1	6	59	1.14129	6	10.4799	1.36346	6	2.21374	1.19784	6	8.55702	1.10549	6	23.7058	0.879373	6	0.6962	1.17386	6	10.5821	0.983379	6	4.2704	246	28.0368	4.88135
	A2	Sequence	# PSMs	# Proteins	# Protein Groups	Protein Group Accessions	Modifications	ΔCn	(115+116)/(113+114)	(115+116)/(113+114) Count	(115+116)/(113+114) Variability [%]	(117+118)/(113+114)	(117+118)/(113+114) Count	(117+118)/(113+114) Variability [%]	(119+121)/(113+114)	(119+121)/(113+114) Count	(119+121)/(113+114) Variability [%]	114/113	114/113 Count	114/113 Variability [%]	115/116	115/116 Count	115/116 Variability [%]	117/118	117/118 Count	117/118 Variability [%]	119/121	119/121 Count	119/121 Variability [%]	IonScore	Exp Value	Charge	MH+ [Da]	ΔM [ppm]	RT [min]	# Missed Cleavages
	High	aVTEQGHELSNEER	6	1	1	P35213	N-Term(iTRAQ8plex)	0	1.14129	6	10.4799	1.36346	6	2.21374	1.19784	6	8.55702	1.10549	6	23.7058	0.879373	6	0.6962	1.17386	6	10.5821	0.983379	6	4.2704	62.86	1.08697e-06	2	1902.93	-7.67725	9.12499	0
	High	dSTLIMQLLR	38	6	6	P62260;P35213;P68255;P63102;P68511;P61983	N-Term(iTRAQ8plex)	0																						59.58	4.46123e-06	3	1493.86	-6.70374	12.6187	0
	High	yDDMAAAMk	5	2	2	P35213;P61983	N-Term(iTRAQ8plex); K9(iTRAQ8plex)	0																						55.16	8.99129e-06	2	1623.83	-3.26692	14.0681	0
	High	vISSIEQk	3	4	4	P35213;P68255;P68511;P61983	N-Term(iTRAQ8plex); K8(iTRAQ8plex)	0																						36.44	0.00107819	2	1511.92	-2.9812	12.096	0
	High	dSTLImQLLR	1	6	6	P62260;P35213;P68255;P63102;P68511;P61983	N-Term(iTRAQ8plex); M6(Oxidation)	0																						34.02	0.00198139	2	1509.85	-9.54199	2.09088	0
	High	yDDMAAAmk	1	2	2	P35213;P61983	N-Term(iTRAQ8plex); M8(Oxidation); K9(iTRAQ8plex)	0																						32.29	0.00194766	2	1639.82	-3.11175	18.2019	0
	High	lAEQAER	3	6	6	P62260;P35213;P68255;P63102;P68511;P61983	N-Term(iTRAQ8plex)	0																						28.74	0.00527955	2	1120.62	-3.72232	9.935	0
	High	nLLSVAYk	2	6	6	P62260;P35213;P68255;P63102;P68511;P61983	N-Term(iTRAQ8plex); K8(iTRAQ8plex)	0																						27.69	0.00553202	2	1515.93	-1.22034	5.74511	0
P62260	14-3-3 protein epsilon OS=Rattus norvegicus GN=Ywhae PE=1 SV=1 - [1433E_RAT]	1728.72	45.88	1	10	13	71	1.09475	27	10.8051	1.36267	27	13.6055	1.01733	27	13.0121	0.985989	27	15.7155	1.08657	27	15.6842	1.13561	27	13.1446	0.930135	27	8.85281	255	29.1554	4.7417
	A2	Sequence	# PSMs	# Proteins	# Protein Groups	Protein Group Accessions	Modifications	ΔCn	(115+116)/(113+114)	(115+116)/(113+114) Count	(115+116)/(113+114) Variability [%]	(117+118)/(113+114)	(117+118)/(113+114) Count	(117+118)/(113+114) Variability [%]	(119+121)/(113+114)	(119+121)/(113+114) Count	(119+121)/(113+114) Variability [%]	114/113	114/113 Count	114/113 Variability [%]	115/116	115/116 Count	115/116 Variability [%]	117/118	117/118 Count	117/118 Variability [%]	119/121	119/121 Count	119/121 Variability [%]	IonScore	Exp Value	Charge	MH+ [Da]	ΔM [ppm]	RT [min]	# Missed Cleavages
	High	eALQDVEDENQ	2	1	1	P62260	N-Term(iTRAQ8plex)	0	1.015	2	4.90747	1.1183	2	9.25041	0.961364	2	8.40407	0.910827	2	24.3439	0.901721	2	48.8728	1.17163	2	25.4996	1.00558	2	16.5729	98.79	1.31817e-10	2	1593.74	-8.60176	18.5362	0
	High	vAGMDVELTVEER	5	1	1	P62260	N-Term(iTRAQ8plex)	0	1.21131	5	5.94696	1.46746	5	5.02214	1.11948	5	5.78076	1.05746	5	8.28037	1.20704	5	4.49161	1.09305	5	3.00396	0.930135	5	10.9303	62.99	2.53683e-06	2	1751.91	-0.814773	21.1392	0
	High	dSTLIMQLLR	38	6	6	P62260;P35213;P68255;P63102;P68511;P61983	N-Term(iTRAQ8plex)	0																						59.58	4.46123e-06	3	1493.86	-6.70374	12.6187	0
	High	lIccDILDVLDk	5	1	1	P62260	N-Term(iTRAQ8plex); C3(Carbamidomethyl); C4(Carbamidomethyl); K12(iTRAQ8plex)	0	1.06976	5	14.6393	1.40388	5	4.42004	0.943421	5	7.84646	0.835542	5	7.31897	0.735493	5	3.17729	1.0435	5	3.28325	0.883186	5	8.1287	59.16	9.40376e-06	2	2085.14	-7.43149	13.0288	0
	High	eAAENSLVAYk	3	1	1	P62260	N-Term(iTRAQ8plex); K11(iTRAQ8plex)	0	1.09475	3	7.7447	1.31566	3	8.35275	1.08069	3	4.37662	0.887396	3	7.57372	1.08657	3	10.059	1.14238	3	0.880927	0.831812	3	9.95594	50.99	6.76735e-05	2	1803.02	6.18903	11.5333	0
	High	vAGmDVELTVEER	1	1	1	P62260	N-Term(iTRAQ8plex); M4(Oxidation)	0	1.07127	1		0.795364	1		0.909555	1		0.952897	1		1.02133	1		1.17407	1		0.975612	1		45.8	0.000120992	2	1767.92	3.93315	20.0778	0
	High	eAAEnSLVAYk	1	1	1	P62260	N-Term(iTRAQ8plex); N5(Deamidated); K11(iTRAQ8plex)	0	1.0012	1		0.832554	1		0.846365	1		0.857811	1		0.994166	1		1.20124	1		1.26341	1		44.02	0.000259562	3	1803.98	-8.17116	14.2823	0
	High	yDEMVESMk	2	1	1	P62260	N-Term(iTRAQ8plex); K9(iTRAQ8plex)	0	1.21898	2	11.4099	1.86614	2	13.4761	1.04626	2	9.77018	1.17496	2	6.793	1.12766	2	4.89623	1.4161	2	2.17955	0.933971	2	4.96891	38.75	0.000340048	2	1739.88	1.73526	13.9587	0
	High	eDLVYQAk	1	1	1	P62260	N-Term(iTRAQ8plex); K8(iTRAQ8plex)	0	1.04849	1		1.38004	1		1.07381	1		0.945978	1		0.84799	1		1.30491	1		0.88191	1		36.71	0.00124783	2	1573.92	8.83993	14.457	0
	High	qMVETELk	4	1	1	P62260	N-Term(iTRAQ8plex); K8(iTRAQ8plex)	0	1.02287	4	1.16187	1.20297	4	8.6027	1.01687	4	9.56522	0.988064	4	4.78609	1.12209	4	6.8736	1.09301	4	9.39954	0.956911	4	6.95724	36.45	0.00167584	2	1585.89	-9.83655	9.23882	0
	High	dSTLImQLLR	1	6	6	P62260;P35213;P68255;P63102;P68511;P61983	N-Term(iTRAQ8plex); M6(Oxidation)	0																						34.02	0.00198139	2	1509.85	-9.54199	2.09088	0
	High	yLAEFATGNDR	1	1	1	P62260	N-Term(iTRAQ8plex)	0	1.14485	1		1.04653	1		0.97304	1		1.09168	1		0.828317	1		1.24042	1		0.876323	1		30.54	0.00172201	2	1560.79	-2.85099	9.30727	0
	High	iISSIEQk	1	1	1	P62260	N-Term(iTRAQ8plex); K8(iTRAQ8plex)	0	0.976406	1		1.24866	1		1.19936	1		0.932804	1		1.12432	1		1.17374	1		1.00126	1		29.63	0.00686026	2	1525.93	-4.33015	9.56876	0
	High	yLAEFATGNDRk	1	1	1	P62260	N-Term(iTRAQ8plex); K12(iTRAQ8plex)	0	1.3126	1		1.35677	1		1.11024	1		1.24447	1		1.29389	1		0.855227	1		0.777375	1		29.14	0.00841103	2	1993.08	-5.86477	5.18439	1
	High	lAEQAER	3	6	6	P62260;P35213;P68255;P63102;P68511;P61983	N-Term(iTRAQ8plex)	0																						28.74	0.00527955	2	1120.62	-3.72232	9.935	0
	High	nLLSVAYk	2	6	6	P62260;P35213;P68255;P63102;P68511;P61983	N-Term(iTRAQ8plex); K8(iTRAQ8plex)	0																						27.69	0.00553202	2	1515.93	-1.22034	5.74511	0
P68511	14-3-3 protein eta OS=Rattus norvegicus GN=Ywhah PE=1 SV=2 - [1433F_RAT]	1489.66	48.78	1	7	12	66	1.36798	16	13.9569	1.84299	16	33.9051	1.43812	16	14.7766	0.98583	14	15.5239	1.01658	15	13.0638	1.12149	16	22.7807	0.947545	16	13.526	246	28.194	4.89404
	A2	Sequence	# PSMs	# Proteins	# Protein Groups	Protein Group Accessions	Modifications	ΔCn	(115+116)/(113+114)	(115+116)/(113+114) Count	(115+116)/(113+114) Variability [%]	(117+118)/(113+114)	(117+118)/(113+114) Count	(117+118)/(113+114) Variability [%]	(119+121)/(113+114)	(119+121)/(113+114) Count	(119+121)/(113+114) Variability [%]	114/113	114/113 Count	114/113 Variability [%]	115/116	115/116 Count	115/116 Variability [%]	117/118	117/118 Count	117/118 Variability [%]	119/121	119/121 Count	119/121 Variability [%]	IonScore	Exp Value	Charge	MH+ [Da]	ΔM [ppm]	RT [min]	# Missed Cleavages
	High	aVTELNEPLSNEDR	4	1	1	P68511	N-Term(iTRAQ8plex)	0	1.46455	4	30.2001	1.83603	4	43.4223	1.43812	4	42.5833	1.02957	3	23.113	0.931863	4	10.3079	1.21809	4	17.4648	0.928076	4	19.3545	90.53	4.29281e-09	2	1890.99	7.69546	17.1058	0
	High	dSTLIMQLLR	38	6	6	P62260;P35213;P68255;P63102;P68511;P61983	N-Term(iTRAQ8plex)	0																						59.58	4.46123e-06	3	1493.86	-6.70374	12.6187	0
	High	nSVVEASEAAYk	2	1	1	P68511	N-Term(iTRAQ8plex); K12(iTRAQ8plex)	0	1.20546	2	1.87167	1.67667	2	16.9118	1.26164	2	14.1855	0.779027	2	27.7792	0.760918	2	49.8654	1.12079	2	4.54477	1.10317	2	6.47541	55.38	1.66597e-05	2	1876.01	-8.70434	9.46216	0
	High	eLETVcNDVLALLDk	2	1	1	P68511	N-Term(iTRAQ8plex); C6(Carbamidomethyl); K15(iTRAQ8plex)	0	0.997948	2	116.869	2.2982	2	33.9713	1.86073	2	49.6983	0.533481	1		0.713055	1		0.790923	2	3.27866	0.999652	2	51.4004	52.47	4.67147e-05	3	2340.29	-0.275229	13.4676	0
	High	yDDMASAMk	4	1	1	P68511	N-Term(iTRAQ8plex); K9(iTRAQ8plex)	0	1.44026	4	7.80635	2.55327	4	2.22648	1.69645	4	9.81863	1.1042	4	9.24101	1.1084	4	2.92862	1.39091	4	3.69726	0.923261	4	2.81757	46.86	5.76976e-05	2	1639.84	6.27082	15.7443	0
	High	yLAEVASGEk	2	1	1	P68511	N-Term(iTRAQ8plex); K10(iTRAQ8plex)	0	1.36892	2	2.95418	1.50131	2	4.76077	1.39986	2	4.38418	1.02651	2	10.2812	0.977179	2	9.59345	1.00728	2	8.4499	1.03859	2	2.12861	45.98	0.0001451	2	1674.95	-1.1441	9.21753	0
	High	vISSIEQk	3	4	4	P35213;P68255;P68511;P61983	N-Term(iTRAQ8plex); K8(iTRAQ8plex)	0																						36.44	0.00107819	2	1511.92	-2.9812	12.096	0
	High	eHMQPTHPIR	2	2	2	P68511;P61983	N-Term(iTRAQ8plex)	0																						36.06	0.00101574	3	1549.82	-3.64396	7.62479	0
	High	eHmQPTHPIR	1	2	2	P68511;P61983	N-Term(iTRAQ8plex); M3(Oxidation)	0																						35.01	0.00127778	3	1565.82	-0.632071	9.08638	0
	High	dSTLImQLLR	1	6	6	P62260;P35213;P68255;P63102;P68511;P61983	N-Term(iTRAQ8plex); M6(Oxidation)	0																						34.02	0.00198139	2	1509.85	-9.54199	2.09088	0
	High	eAFEISk	1	1	1	P68511	N-Term(iTRAQ8plex); K7(iTRAQ8plex)	0	1.36326	1		1.8098	1		1.34179	1		0.893296	1		1.01432	1		1.1388	1		0.944572	1		29.07	0.00842382	2	1431.84	6.64882	10.0195	0
	High	lAEQAER	3	6	6	P62260;P35213;P68255;P63102;P68511;P61983	N-Term(iTRAQ8plex)	0																						28.74	0.00527955	2	1120.62	-3.72232	9.935	0
	High	nLLSVAYk	2	6	6	P62260;P35213;P68255;P63102;P68511;P61983	N-Term(iTRAQ8plex); K8(iTRAQ8plex)	0																						27.69	0.00553202	2	1515.93	-1.22034	5.74511	0
	High	ncNDFQYESk	1	1	1	P68511	N-Term(iTRAQ8plex); C2(Carbamidomethyl); K10(iTRAQ8plex)	0	1.26964	1		1.63832	1		1.15986	1		0.943431	1		1.31639	1		1.09203	1		0.891082	1		21.69	0.0081317	2	1912.91	-9.13213	10.7229	0
P61983	14-3-3 protein gamma OS=Rattus norvegicus GN=Ywhag PE=1 SV=2 - [1433G_RAT]	1541.14	46.15	1	5	11	68	1.42632	9	8.59138	2.27124	10	34.6001	2.14798	10	41.5822	0.888207	8	22.951	1.06949	8	5.55719	1.18148	11	16.9288	0.988849	10	12.3931	247	28.2849	4.89404
	A2	Sequence	# PSMs	# Proteins	# Protein Groups	Protein Group Accessions	Modifications	ΔCn	(115+116)/(113+114)	(115+116)/(113+114) Count	(115+116)/(113+114) Variability [%]	(117+118)/(113+114)	(117+118)/(113+114) Count	(117+118)/(113+114) Variability [%]	(119+121)/(113+114)	(119+121)/(113+114) Count	(119+121)/(113+114) Variability [%]	114/113	114/113 Count	114/113 Variability [%]	115/116	115/116 Count	115/116 Variability [%]	117/118	117/118 Count	117/118 Variability [%]	119/121	119/121 Count	119/121 Variability [%]	IonScore	Exp Value	Charge	MH+ [Da]	ΔM [ppm]	RT [min]	# Missed Cleavages
	High	nVTELNEPLSNEER	6	1	1	P61983	N-Term(iTRAQ8plex)	0	1.49339	4	6.02063	2.83889	5	15.5565	2.42532	5	23.5871	0.964513	4	16.2631	1.04487	4	3.94349	1.15184	6	20.9683	0.952299	6	10.8486	71.59	1.80291e-07	3	1947.98	-7.40705	11.9695	0
	High	eLEAVcQDVLSLLDNYLIk	1	1	1	P61983	N-Term(iTRAQ8plex); C6(Carbamidomethyl); K19(iTRAQ8plex)	0																						65.49	2.79663e-06	3	2843.58	2.59376	7.80232	0
	High	dSTLIMQLLR	38	6	6	P62260;P35213;P68255;P63102;P68511;P61983	N-Term(iTRAQ8plex)	0																						59.58	4.46123e-06	3	1493.86	-6.70374	12.6187	0
	High	yDDMAAAMk	5	2	2	P35213;P61983	N-Term(iTRAQ8plex); K9(iTRAQ8plex)	0																						55.16	8.99129e-06	2	1623.83	-3.26692	14.0681	0
	High	yLAEVATGEk	3	1	1	P61983	N-Term(iTRAQ8plex); K10(iTRAQ8plex)	0	1.26156	3	18.3505	1.82899	3	21.4119	1.65563	3	23.528	0.972257	2	24.0823	1.1041	2	3.62179	1.18148	3	16.9288	1.11265	2	4.88714	42.7	0.000276571	2	1688.97	-1.36624	13.6361	0
	High	ncSETQYESk	1	1	1	P61983	N-Term(iTRAQ8plex); C2(Carbamidomethyl); K10(iTRAQ8plex)	0	1.51125	1		3.36248	1		3.30841	1		0.758934	1		1.3147	1		1.07602	1		0.65801	1		39.23	0.000358196	2	1853.91	-3.6291	10.8375	0
	High	vISSIEQk	3	4	4	P35213;P68255;P68511;P61983	N-Term(iTRAQ8plex); K8(iTRAQ8plex)	0																						36.44	0.00107819	2	1511.92	-2.9812	12.096	0
	High	eHMQPTHPIR	2	2	2	P68511;P61983	N-Term(iTRAQ8plex)	0																						36.06	0.00101574	3	1549.82	-3.64396	7.62479	0
	High	eHmQPTHPIR	1	2	2	P68511;P61983	N-Term(iTRAQ8plex); M3(Oxidation)	0																						35.01	0.00127778	3	1565.82	-0.632071	9.08638	0
	High	dSTLImQLLR	1	6	6	P62260;P35213;P68255;P63102;P68511;P61983	N-Term(iTRAQ8plex); M6(Oxidation)	0																						34.02	0.00198139	2	1509.85	-9.54199	2.09088	0
	High	aTVVESSEk	1	1	1	P61983	N-Term(iTRAQ8plex); K9(iTRAQ8plex)	0	1.23605	1		2.07236	1		1.99242	1		0.747536	1		1.03194	1		1.23412	1		0.982734	1		33.39	0.00332153	2	1557.88	-8.9163	9.11877	0
	High	yDDMAAAmk	1	2	2	P35213;P61983	N-Term(iTRAQ8plex); M8(Oxidation); K9(iTRAQ8plex)	0																						32.29	0.00194766	2	1639.82	-3.11175	18.2019	0
	High	lAEQAER	3	6	6	P62260;P35213;P68255;P63102;P68511;P61983	N-Term(iTRAQ8plex)	0																						28.74	0.00527955	2	1120.62	-3.72232	9.935	0
	High	nLLSVAYk	2	6	6	P62260;P35213;P68255;P63102;P68511;P61983	N-Term(iTRAQ8plex); K8(iTRAQ8plex)	0																						27.69	0.00553202	2	1515.93	-1.22034	5.74511	0
P68255	14-3-3 protein theta OS=Rattus norvegicus GN=Ywhaq PE=1 SV=1 - [1433T_RAT]	2141.11	32.65	1	5	9	77	1.19615	27	7.72757	1.26978	28	7.17548	0.997094	27	6.37616	0.970992	27	16.3728	0.948355	28	12.1764	1.12798	27	13.3	0.948242	27	10.7805	245	27.7608	4.77979
	A2	Sequence	# PSMs	# Proteins	# Protein Groups	Protein Group Accessions	Modifications	ΔCn	(115+116)/(113+114)	(115+116)/(113+114) Count	(115+116)/(113+114) Variability [%]	(117+118)/(113+114)	(117+118)/(113+114) Count	(117+118)/(113+114) Variability [%]	(119+121)/(113+114)	(119+121)/(113+114) Count	(119+121)/(113+114) Variability [%]	114/113	114/113 Count	114/113 Variability [%]	115/116	115/116 Count	115/116 Variability [%]	117/118	117/118 Count	117/118 Variability [%]	119/121	119/121 Count	119/121 Variability [%]	IonScore	Exp Value	Charge	MH+ [Da]	ΔM [ppm]	RT [min]	# Missed Cleavages
	High	aVTEQGAELSNEER	10	1	1	P68255	N-Term(iTRAQ8plex)	0	1.16064	9	5.43032	1.27937	10	6.45421	0.969747	9	7.27694	0.962104	9	17.7658	0.944771	9	14.3543	1.10272	9	13.4811	0.938974	9	9.99634	79.97	2.97045e-08	3	1836.91	-6.89699	15.5439	0
	High	sIcTTVLELLDk	6	1	1	P68255	N-Term(iTRAQ8plex); C3(Carbamidomethyl); K12(iTRAQ8plex)	0	1.23968	6	4.21551	1.51163	6	25.0132	1.02384	6	4.34086	0.787122	6	25.1947	0.997214	6	31.4081	1.20542	6	19.5847	1.0597	6	3.91494	78.67	9.91569e-08	2	2000.14	-8.55232	10.3521	0
	High	yLAEVAcGDDR	11	1	1	P68255	N-Term(iTRAQ8plex); C7(Carbamidomethyl)	0	1.1993	9	3.38857	1.23913	9	3.84747	1.019	9	7.50571	1.06868	9	8.71799	0.920832	10	6.77786	1.05137	9	13.1348	0.888846	9	6.60882	59.73	1.22376e-06	2	1572.77	1.31421	21.3304	0
	High	dSTLIMQLLR	38	6	6	P62260;P35213;P68255;P63102;P68511;P61983	N-Term(iTRAQ8plex)	0																						59.58	4.46123e-06	3	1493.86	-6.70374	12.6187	0
	High	yLAEVAcGDDRk	1	1	1	P68255	N-Term(iTRAQ8plex); C7(Carbamidomethyl); K12(iTRAQ8plex)	0	1.12178	1		1.0866	1		0.99147	1		0.989167	1		1.05545	1		1.03189	1		0.800637	1		44.72	0.000210805	2	2005.06	-1.05756	9.19468	1
	High	yLAEVAcGDDR	1	1	1	P68255	N-Term(iTRAQ8plex); Y1(iTRAQ8plex); C7(Carbamidomethyl)	0	1.24461	1		1.10276	1		0.950295	1		0.989069	1		1.44462	1		1.25544	1		1.0294	1		39.62	0.000436576	3	1876.97	0.391071	13.3106	0
	High	vISSIEQk	3	4	4	P35213;P68255;P68511;P61983	N-Term(iTRAQ8plex); K8(iTRAQ8plex)	0																						36.44	0.00107819	2	1511.92	-2.9812	12.096	0
	High	dSTLImQLLR	1	6	6	P62260;P35213;P68255;P63102;P68511;P61983	N-Term(iTRAQ8plex); M6(Oxidation)	0																						34.02	0.00198139	2	1509.85	-9.54199	2.09088	0
	High	yDDMATcMk	1	1	1	P68255	N-Term(iTRAQ8plex); C7(Carbamidomethyl); K9(iTRAQ8plex)	0	1.09797	1		1.69877	1		1.00726	1		1.21846	1		1.0537	1		1.22411	1		1.00608	1		33.3	0.000491122	2	1742.82	-9.87561	12.5537	0
	High	lAEQAER	3	6	6	P62260;P35213;P68255;P63102;P68511;P61983	N-Term(iTRAQ8plex)	0																						28.74	0.00527955	2	1120.62	-3.72232	9.935	0
	High	nLLSVAYk	2	6	6	P62260;P35213;P68255;P63102;P68511;P61983	N-Term(iTRAQ8plex); K8(iTRAQ8plex)	0																						27.69	0.00553202	2	1515.93	-1.22034	5.74511	0
P63102	14-3-3 protein zeta/delta OS=Rattus norvegicus GN=Ywhaz PE=1 SV=1 - [1433Z_RAT]	1760.91	44.9	1	6	10	70	1.24462	20	8.93827	1.52397	20	18.0222	1.23258	20	8.44266	0.980579	19	9.75813	0.987668	22	19.9934	1.12131	21	9.73609	0.98313	19	8.53511	245	27.7537	4.79248
	A2	Sequence	# PSMs	# Proteins	# Protein Groups	Protein Group Accessions	Modifications	ΔCn	(115+116)/(113+114)	(115+116)/(113+114) Count	(115+116)/(113+114) Variability [%]	(117+118)/(113+114)	(117+118)/(113+114) Count	(117+118)/(113+114) Variability [%]	(119+121)/(113+114)	(119+121)/(113+114) Count	(119+121)/(113+114) Variability [%]	114/113	114/113 Count	114/113 Variability [%]	115/116	115/116 Count	115/116 Variability [%]	117/118	117/118 Count	117/118 Variability [%]	119/121	119/121 Count	119/121 Variability [%]	IonScore	Exp Value	Charge	MH+ [Da]	ΔM [ppm]	RT [min]	# Missed Cleavages
	High	sVTEQGAELSNEER	10	1	1	P63102	N-Term(iTRAQ8plex)	0	1.27545	8	12.5159	1.66436	8	7.04337	1.21821	8	9.81427	0.918261	7	20.3498	1.00673	9	11.1258	1.13743	8	15.0709	0.969413	8	13.001	80.74	2.06617e-08	3	1852.91	-7.58209	14.0298	0
	High	dSTLIMQLLR	38	6	6	P62260;P35213;P68255;P63102;P68511;P61983	N-Term(iTRAQ8plex)	0																						59.58	4.46123e-06	3	1493.86	-6.70374	12.6187	0
	High	gIVDQSQQAYQEAFEISk	2	1	1	P63102	N-Term(iTRAQ8plex); K18(iTRAQ8plex)	0													1.12536	1		0.869387	1					58.67	1.33115e-05	3	2649.39	-2.01441	11.4561	0
	High	yLAEVAAGDDk	7	1	1	P63102	N-Term(iTRAQ8plex); K11(iTRAQ8plex)	0	1.25018	7	7.92043	1.39148	7	10.4712	1.24453	7	8.69913	0.98683	7	2.44236	0.849938	7	5.43621	1.09898	7	6.73811	1.03039	6	5.83061	49.54	6.44804e-05	2	1759.97	0.765355	13.5583	0
	High	yDDMAAcMk	2	1	1	P63102	N-Term(iTRAQ8plex); C7(Carbamidomethyl); K9(iTRAQ8plex)	0	1.25478	2	1.98304	2.08669	2	3.14354	1.30915	2	6.87746	1.14723	2	5.02084	1.16055	2	2.23124	1.23953	2	3.029	0.968909	2	5.41591	40.65	0.000189419	2	1712.84	6.3793	15.7253	0
	High	tAFDEAIAELDTLSEESYk	1	1	1	P63102	N-Term(iTRAQ8plex); K19(iTRAQ8plex)	0																						38.14	0.00118933	4	2740.39	-4.48177	27.3226	0
	High	vVSSIEQk	3	1	1	P63102	N-Term(iTRAQ8plex); K8(iTRAQ8plex)	0	1.14897	3	0.510016	1.28876	3	3.45503	1.15666	3	8.25723	0.923861	3	0.343519	1.10878	3	0.502957	1.11534	3	1.47103	0.949357	3	6.24165	35.43	0.00204789	2	1497.91	3.28262	4.55251	0
	High	dSTLImQLLR	1	6	6	P62260;P35213;P68255;P63102;P68511;P61983	N-Term(iTRAQ8plex); M6(Oxidation)	0																						34.02	0.00198139	2	1509.85	-9.54199	2.09088	0
	High	lAEQAER	3	6	6	P62260;P35213;P68255;P63102;P68511;P61983	N-Term(iTRAQ8plex)	0																						28.74	0.00527955	2	1120.62	-3.72232	9.935	0
	High	iETELR	1	2	2	P63102;Q6AYK6	N-Term(iTRAQ8plex)	0																						27.78	0.00716916	2	1064.62	-7.72886	10.1346	0
	High	nLLSVAYk	2	6	6	P62260;P35213;P68255;P63102;P68511;P61983	N-Term(iTRAQ8plex); K8(iTRAQ8plex)	0																						27.69	0.00553202	2	1515.93	-1.22034	5.74511	0
Q99JE6	1-phosphatidylinositol-4,5-bisphosphate phosphodiesterase beta-3 OS=Rattus norvegicus GN=Plcb3 PE=1 SV=2 - [PLCB3_RAT]	87.1731	1.78	1	2	2	3	1.58291	3	27.3803	2.08459	3	36.1378	2.34068	3	24.2337	0.886645	3	12.8496	0.759467	3	28.8167	1.08779	3	1.02016	0.984509	3	7.10607	1234	139.363	5.8335
	A2	Sequence	# PSMs	# Proteins	# Protein Groups	Protein Group Accessions	Modifications	ΔCn	(115+116)/(113+114)	(115+116)/(113+114) Count	(115+116)/(113+114) Variability [%]	(117+118)/(113+114)	(117+118)/(113+114) Count	(117+118)/(113+114) Variability [%]	(119+121)/(113+114)	(119+121)/(113+114) Count	(119+121)/(113+114) Variability [%]	114/113	114/113 Count	114/113 Variability [%]	115/116	115/116 Count	115/116 Variability [%]	117/118	117/118 Count	117/118 Variability [%]	119/121	119/121 Count	119/121 Variability [%]	IonScore	Exp Value	Charge	MH+ [Da]	ΔM [ppm]	RT [min]	# Missed Cleavages
	High	dVLEAIAETAFk	2	1	1	Q99JE6	N-Term(iTRAQ8plex); K12(iTRAQ8plex)	0	1.73134	2	41.8526	2.60543	2	33.9905	2.78483	2	26.1928	0.849194	2	6.40506	0.786568	2	34.3994	1.09154	2	0.510068	1.01767	2	4.91476	48	0.000114905	3	1915.09	-7.26482	13.6028	0
	High	eAQADAETER	1	1	1	Q99JE6	N-Term(iTRAQ8plex)	0	1.58291	1		1.64587	1		1.99235	1		1.15771	1		0.759467	1		1.02178	1		0.938491	1		29.85	0.00103269	2	1423.69	-1.62097	10.9244	0
P62193	26S protease regulatory subunit 4 OS=Rattus norvegicus GN=Psmc1 PE=2 SV=1 - [PRS4_RAT]	61.1893	5.45	1	2	2	2	1.11292	1		1.29597	1		1.11578	1		0.925055	1		1.06991	1		1.10804	1		0.863462	1		440	49.1537	6.21436
	A2	Sequence	# PSMs	# Proteins	# Protein Groups	Protein Group Accessions	Modifications	ΔCn	(115+116)/(113+114)	(115+116)/(113+114) Count	(115+116)/(113+114) Variability [%]	(117+118)/(113+114)	(117+118)/(113+114) Count	(117+118)/(113+114) Variability [%]	(119+121)/(113+114)	(119+121)/(113+114) Count	(119+121)/(113+114) Variability [%]	114/113	114/113 Count	114/113 Variability [%]	115/116	115/116 Count	115/116 Variability [%]	117/118	117/118 Count	117/118 Variability [%]	119/121	119/121 Count	119/121 Variability [%]	IonScore	Exp Value	Charge	MH+ [Da]	ΔM [ppm]	RT [min]	# Missed Cleavages
	High	tMLELLNQLDGFDSR	1	1	1	P62193	N-Term(iTRAQ8plex)	0																						44.16	0.000188017	3	2056.06	-6.56664	14.0591	0
	High	dDLSGADIk	1	1	1	P62193	N-Term(iTRAQ8plex); K9(iTRAQ8plex)	0	1.11292	1		1.29597	1		1.11578	1		0.925055	1		1.06991	1		1.10804	1		0.863462	1		36.77	0.00119915	2	1541.85	-8.9039	14.7815	0
Q63569	26S protease regulatory subunit 6A OS=Rattus norvegicus GN=Psmc3 PE=2 SV=1 - [PRS6A_RAT]	211.723	3.87	1	2	2	11	1.15602	11	2.46594	1.11441	11	8.18788	1.17385	11	4.96826	1.03017	11	4.78541	0.97127	11	11.6808	1.03349	11	14.4246	0.927115	11	5.80088	439	49.1294	5.23682
	A2	Sequence	# PSMs	# Proteins	# Protein Groups	Protein Group Accessions	Modifications	ΔCn	(115+116)/(113+114)	(115+116)/(113+114) Count	(115+116)/(113+114) Variability [%]	(117+118)/(113+114)	(117+118)/(113+114) Count	(117+118)/(113+114) Variability [%]	(119+121)/(113+114)	(119+121)/(113+114) Count	(119+121)/(113+114) Variability [%]	114/113	114/113 Count	114/113 Variability [%]	115/116	115/116 Count	115/116 Variability [%]	117/118	117/118 Count	117/118 Variability [%]	119/121	119/121 Count	119/121 Variability [%]	IonScore	Exp Value	Charge	MH+ [Da]	ΔM [ppm]	RT [min]	# Missed Cleavages
	High	vDILDPALLR	10	1	1	Q63569	N-Term(iTRAQ8plex)	0	1.15606	10	5.64701	1.08314	10	9.16396	1.18187	10	5.018	1.03558	10	4.62456	0.968077	10	9.67475	0.99863	10	10.4721	0.914533	10	4.74202	47.28	6.54739e-05	2	1428.88	6.26376	17.238	0
	High	lLDSEIk	1	1	1	Q63569	N-Term(iTRAQ8plex); K7(iTRAQ8plex)	0	1.1372	1		1.17757	1		1.09749	1		1.00577	1		1.05061	1		1.15369	1		0.98924	1		32.93	0.00295412	2	1425.87	-2.10827	10.3235	0
Q63570	26S protease regulatory subunit 6B OS=Rattus norvegicus GN=Psmc4 PE=1 SV=1 - [PRS6B_RAT]	78.9748	5.5	1	2	2	4	1.17824	4	3.27905	1.07661	4	4.53328	1.10814	4	3.25013	1.10051	4	6.03629	0.996737	4	7.12057	1.02668	4	5.64832	0.990151	4	5.53401	418	47.3786	5.21143
	A2	Sequence	# PSMs	# Proteins	# Protein Groups	Protein Group Accessions	Modifications	ΔCn	(115+116)/(113+114)	(115+116)/(113+114) Count	(115+116)/(113+114) Variability [%]	(117+118)/(113+114)	(117+118)/(113+114) Count	(117+118)/(113+114) Variability [%]	(119+121)/(113+114)	(119+121)/(113+114) Count	(119+121)/(113+114) Variability [%]	114/113	114/113 Count	114/113 Variability [%]	115/116	115/116 Count	115/116 Variability [%]	117/118	117/118 Count	117/118 Variability [%]	119/121	119/121 Count	119/121 Variability [%]	IonScore	Exp Value	Charge	MH+ [Da]	ΔM [ppm]	RT [min]	# Missed Cleavages
	High	eAVELPLTHFELYk	1	1	1	Q63570	N-Term(iTRAQ8plex); K14(iTRAQ8plex)	0	1.02862	1		1.13479	1		0.889389	1		1.08319	1		1.06243	1		0.981371	1		0.971272	1		39.21	0.000911619	3	2297.32	8.51209	7.55022	0
	High	fDAQTGADR	3	1	1	Q63570	N-Term(iTRAQ8plex)	0	1.1883	3	2.52094	1.06751	3	2.51883	1.13083	3	0.489398	1.1181	3	10.8433	0.965241	3	5.33512	1.059	3	9.2126	1.0094	3	11.0935	33.15	0.000919927	2	1284.64	-7.22497	14.3787	0
Q63347	26S protease regulatory subunit 7 OS=Rattus norvegicus GN=Psmc2 PE=1 SV=3 - [PRS7_RAT]	418.07	14.09	1	5	5	12	1.19639	10	10.0313	1.19373	10	7.55517	1.13863	10	9.04352	0.996643	10	11.6207	1.11364	9	11.7584	1.02234	9	11.685	0.956208	10	6.3033	433	48.5441	5.79541
	A2	Sequence	# PSMs	# Proteins	# Protein Groups	Protein Group Accessions	Modifications	ΔCn	(115+116)/(113+114)	(115+116)/(113+114) Count	(115+116)/(113+114) Variability [%]	(117+118)/(113+114)	(117+118)/(113+114) Count	(117+118)/(113+114) Variability [%]	(119+121)/(113+114)	(119+121)/(113+114) Count	(119+121)/(113+114) Variability [%]	114/113	114/113 Count	114/113 Variability [%]	115/116	115/116 Count	115/116 Variability [%]	117/118	117/118 Count	117/118 Variability [%]	119/121	119/121 Count	119/121 Variability [%]	IonScore	Exp Value	Charge	MH+ [Da]	ΔM [ppm]	RT [min]	# Missed Cleavages
	High	tMLELINQLDGFDPR	2	1	1	Q63347	N-Term(iTRAQ8plex)	0	1.22734	2	2.77101	1.25856	2	3.471	1.23745	2	3.31389	0.996643	2	0.957956	1.02408	2	12.4781	1.04293	2	16.6548	0.968243	2	9.79872	92.67	2.75785e-09	2	2066.08	-5.93166	13.2713	0
	High	acLIFFDEIDAIGGAR	3	1	1	Q63347	N-Term(iTRAQ8plex); C2(Carbamidomethyl)	0	1.12327	2	8.34918	1.19373	2	1.67074	1.09283	2	2.93829	1.05821	2	4.30523	1.15678	2	1.83415	0.99124	2	1.04371	0.984669	2	14.6177	65.89	1.37833e-06	2	2072.06	-8.12523	13.5779	0
	High	eVVETPLLHPER	3	1	1	Q63347	N-Term(iTRAQ8plex)	0	1.31006	3	21.6949	1.22157	3	9.3896	1.20597	3	26.3007	0.646029	3	30.6534	0.993124	3	23.0356	1.02876	3	12.6228	0.955836	3	2.14425	64.79	1.75904e-06	3	1722.97	1.33457	13.2171	0
	High	aLDEGDIALLk	2	1	1	Q63347	N-Term(iTRAQ8plex); K11(iTRAQ8plex)	0	0.46367	1		0.443405	1		1.07718	1		1.26259	1								0.986827	1		37.09	0.00108466	3	1766.04	-4.86463	7.57799	0
	High	eLFEMAR	2	1	1	Q63347	N-Term(iTRAQ8plex)	0	1.20568	2	2.34696	1.13451	2	1.37562	1.10061	2	8.19686	1.14711	2	23.8636	1.09465	2	9.18732	1.07187	2	7.0226	0.954909	2	0.259426	23.43	0.00567427	2	1199.64	-1.26886	11.4298	0
P62198	26S protease regulatory subunit 8 OS=Rattus norvegicus GN=Psmc5 PE=1 SV=1 - [PRS8_RAT]	202.326	10.1	1	3	3	7	1.11857	7	9.59926	1.10232	7	8.65242	1.08624	7	7.06403	1.00081	7	16.7205	1.05722	7	16.1966	1.04924	7	22.8762	0.92145	7	5.90683	406	45.5971	7.54736
	A2	Sequence	# PSMs	# Proteins	# Protein Groups	Protein Group Accessions	Modifications	ΔCn	(115+116)/(113+114)	(115+116)/(113+114) Count	(115+116)/(113+114) Variability [%]	(117+118)/(113+114)	(117+118)/(113+114) Count	(117+118)/(113+114) Variability [%]	(119+121)/(113+114)	(119+121)/(113+114) Count	(119+121)/(113+114) Variability [%]	114/113	114/113 Count	114/113 Variability [%]	115/116	115/116 Count	115/116 Variability [%]	117/118	117/118 Count	117/118 Variability [%]	119/121	119/121 Count	119/121 Variability [%]	IonScore	Exp Value	Charge	MH+ [Da]	ΔM [ppm]	RT [min]	# Missed Cleavages
	High	tMLELLNQLDGFEATk	2	1	1	P62198	N-Term(iTRAQ8plex); K16(iTRAQ8plex)	0	1.52515	2	1.4821	1.83909	2	10.8884	1.42338	2	4.90819	0.934651	2	14.8009	0.853175	2	39.2801	1.2779	2	2.31712	1.01436	2	16.5211	61.67	6.09289e-06	3	2431.32	-7.63295	12.2089	0
	High	lEGGSGGDSEVQR	4	1	1	P62198	N-Term(iTRAQ8plex)	0	1.11462	4	5.31695	1.08944	4	5.51635	1.07963	4	1.48615	1.02708	4	12.1899	1.01507	4	9.75528	0.919065	4	9.46691	0.905578	4	9.6286	50.63	1.72994e-05	2	1594.8	1.33361	16.7674	0
	High	nIDINDVTPNcR	1	1	1	P62198	N-Term(iTRAQ8plex); C11(Carbamidomethyl)	0	1.08442	1		1.03994	1		1.03576	1		0.891907	1		1.18169	1		1.1692	1		0.958869	1		23.27	0.00918406	2	1734.86	-7.17353	11.778	0
O88761	26S proteasome non-ATPase regulatory subunit 1 OS=Rattus norvegicus GN=Psmd1 PE=2 SV=1 - [PSMD1_RAT]	164.358	2.31	1	2	2	6	1.09348	4	8.02801	1.11525	4	2.51272	1.04341	4	9.69058	0.962677	4	3.46548	1.06984	4	4.22839	1.07804	4	9.38002	0.901934	4	7.56533	953	105.681	5.38916
	A2	Sequence	# PSMs	# Proteins	# Protein Groups	Protein Group Accessions	Modifications	ΔCn	(115+116)/(113+114)	(115+116)/(113+114) Count	(115+116)/(113+114) Variability [%]	(117+118)/(113+114)	(117+118)/(113+114) Count	(117+118)/(113+114) Variability [%]	(119+121)/(113+114)	(119+121)/(113+114) Count	(119+121)/(113+114) Variability [%]	114/113	114/113 Count	114/113 Variability [%]	115/116	115/116 Count	115/116 Variability [%]	117/118	117/118 Count	117/118 Variability [%]	119/121	119/121 Count	119/121 Variability [%]	IonScore	Exp Value	Charge	MH+ [Da]	ΔM [ppm]	RT [min]	# Missed Cleavages
	High	tPDASPEPk	3	1	1	O88761	N-Term(iTRAQ8plex); K9(iTRAQ8plex)	0	1.07239	3	5.78124	1.1015	3	1.34525	1.02066	3	6.54497	0.949706	3	2.90734	1.05857	3	3.14232	1.13169	3	6.3167	0.864072	3	2.39289	55.11	1.61867e-05	2	1549.87	-0.0849808	11.8593	0
	High	mEEADALIESLcR	3	1	1	O88761	N-Term(iTRAQ8plex); C12(Carbamidomethyl)	0	1.39155	1		1.60757	1		1.39077	1		0.975824	1		1.12067	1		0.997461	1		0.941456	1		53.43	9.3058e-06	2	1840.9	-7.20951	14.5245	0
B0BN93	26S proteasome non-ATPase regulatory subunit 13 OS=Rattus norvegicus GN=Psmd13 PE=1 SV=1 - [PSD13_RAT]	24.6	2.66	1	1	1	1	1.21234	1		1.07961	1		1.09631	1		0.927077	1		0.891862	1		1.09463	1		0.865868	1		376	42.7902	5.8335
	A2	Sequence	# PSMs	# Proteins	# Protein Groups	Protein Group Accessions	Modifications	ΔCn	(115+116)/(113+114)	(115+116)/(113+114) Count	(115+116)/(113+114) Variability [%]	(117+118)/(113+114)	(117+118)/(113+114) Count	(117+118)/(113+114) Variability [%]	(119+121)/(113+114)	(119+121)/(113+114) Count	(119+121)/(113+114) Variability [%]	114/113	114/113 Count	114/113 Variability [%]	115/116	115/116 Count	115/116 Variability [%]	117/118	117/118 Count	117/118 Variability [%]	119/121	119/121 Count	119/121 Variability [%]	IonScore	Exp Value	Charge	MH+ [Da]	ΔM [ppm]	RT [min]	# Missed Cleavages
	High	dLPVSEQQER	1	1	1	B0BN93	N-Term(iTRAQ8plex)	0	1.21234	1		1.07961	1		1.09631	1		0.927077	1		0.891862	1		1.09463	1		0.865868	1		24.6	0.00797495	2	1504.78	-6.63878	13.7042	0
Q4FZT9	26S proteasome non-ATPase regulatory subunit 2 OS=Rattus norvegicus GN=Psmd2 PE=2 SV=1 - [PSMD2_RAT]	40.46	0.88	1	1	1	1	1.08506	1		1.15036	1		1.03626	1		0.984524	1		1.20129	1		1.07303	1		0.984048	1		908	100.124	5.19873
	A2	Sequence	# PSMs	# Proteins	# Protein Groups	Protein Group Accessions	Modifications	ΔCn	(115+116)/(113+114)	(115+116)/(113+114) Count	(115+116)/(113+114) Variability [%]	(117+118)/(113+114)	(117+118)/(113+114) Count	(117+118)/(113+114) Variability [%]	(119+121)/(113+114)	(119+121)/(113+114) Count	(119+121)/(113+114) Variability [%]	114/113	114/113 Count	114/113 Variability [%]	115/116	115/116 Count	115/116 Variability [%]	117/118	117/118 Count	117/118 Variability [%]	119/121	119/121 Count	119/121 Variability [%]	IonScore	Exp Value	Charge	MH+ [Da]	ΔM [ppm]	RT [min]	# Missed Cleavages
	High	eLDIMEPk	1	1	1	Q4FZT9	N-Term(iTRAQ8plex); K8(iTRAQ8plex)	0	1.08506	1		1.15036	1		1.03626	1		0.984524	1		1.20129	1		1.07303	1		0.984048	1		40.46	0.000521709	2	1582.9	-1.04742	19.5612	0
Q62785	28 kDa heat- and acid-stable phosphoprotein OS=Rattus norvegicus GN=Pdap1 PE=1 SV=1 - [HAP28_RAT]	52.7274	8.84	1	1	1	2	0.993326	2	44.3457	1.10696	2	39.8437	0.723159	2	29.0301	1.11103	2	21.5126	0.802124	2	61.8972	0.945618	2	36.8598	0.781718	1		181	20.5925	7.38623
	A2	Sequence	# PSMs	# Proteins	# Protein Groups	Protein Group Accessions	Modifications	ΔCn	(115+116)/(113+114)	(115+116)/(113+114) Count	(115+116)/(113+114) Variability [%]	(117+118)/(113+114)	(117+118)/(113+114) Count	(117+118)/(113+114) Variability [%]	(119+121)/(113+114)	(119+121)/(113+114) Count	(119+121)/(113+114) Variability [%]	114/113	114/113 Count	114/113 Variability [%]	115/116	115/116 Count	115/116 Variability [%]	117/118	117/118 Count	117/118 Variability [%]	119/121	119/121 Count	119/121 Variability [%]	IonScore	Exp Value	Charge	MH+ [Da]	ΔM [ppm]	RT [min]	# Missed Cleavages
	High	qYTSPEEIDAQLQAEk	2	1	1	Q62785	N-Term(iTRAQ8plex); K16(iTRAQ8plex)	0	0.993326	2	44.3457	1.10696	2	39.8437	0.723159	2	29.0301	1.11103	2	21.5126	0.802124	2	61.8972	0.945618	2	36.8598	0.781718	1		40.1	0.000718269	3	2458.29	-0.244969	15.0965	0
Q5XI78	2-oxoglutarate dehydrogenase E1 component, mitochondrial OS=Rattus norvegicus GN=Ogdh PE=1 SV=1 - [ODO1_RAT]	279.516	4.79	1	5	5	10	1.19692	10	8.45407	1.33404	10	11.2201	1.08424	10	5.63693	1.00908	10	7.33041	1.05117	10	8.20612	1.07005	10	12.6405	1.01835	10	9.0048	1023	116.221	6.771
	A2	Sequence	# PSMs	# Proteins	# Protein Groups	Protein Group Accessions	Modifications	ΔCn	(115+116)/(113+114)	(115+116)/(113+114) Count	(115+116)/(113+114) Variability [%]	(117+118)/(113+114)	(117+118)/(113+114) Count	(117+118)/(113+114) Variability [%]	(119+121)/(113+114)	(119+121)/(113+114) Count	(119+121)/(113+114) Variability [%]	114/113	114/113 Count	114/113 Variability [%]	115/116	115/116 Count	115/116 Variability [%]	117/118	117/118 Count	117/118 Variability [%]	119/121	119/121 Count	119/121 Variability [%]	IonScore	Exp Value	Charge	MH+ [Da]	ΔM [ppm]	RT [min]	# Missed Cleavages
	High	fLDTAFDLDAFk	3	1	1	Q5XI78	N-Term(iTRAQ8plex); K12(iTRAQ8plex)	0	1.19857	3	20.9037	1.33431	3	7.4161	1.10346	3	15.0487	1.01774	3	20.9244	1.00005	3	4.68836	1.02216	3	20.0244	1.14247	3	0.902474	80.6	6.31449e-08	2	2011.08	-8.82337	14.4155	0
	High	dMAEEVAITR	2	1	1	Q5XI78	N-Term(iTRAQ8plex)	0	1.24121	2	3.96721	1.44464	2	1.37164	1.11547	2	0.264428	1.09071	2	5.36502	1.0691	2	4.27172	1.12813	2	3.70192	0.977155	2	4.59487	44.87	0.000123818	2	1438.76	7.47258	16.7143	0
	High	dVVVDLVcYR	2	1	1	Q5XI78	N-Term(iTRAQ8plex); C8(Carbamidomethyl)	0	1.2084	2	1.62011	1.38028	2	5.08506	1.09398	2	5.46675	1.02931	2	4.21263	1.15417	2	3.66664	1.10259	2	24.8651	1.00685	2	3.21257	37.92	0.000742605	2	1541.82	-4.55417	11.5533	0
	High	lNVLANVIR	2	1	1	Q5XI78	N-Term(iTRAQ8plex)	0	1.00782	2	5.78369	0.936648	2	7.60633	0.956031	2	7.32861	0.872857	2	14.0821	1.13109	2	10.5985	1.00778	2	4.75643	1.02897	2	10.5452	31.79	0.00139065	2	1315.83	-6.86503	3.13563	0
	High	icEEAFTR	1	1	1	Q5XI78	N-Term(iTRAQ8plex); C2(Carbamidomethyl)	0	1.13768	1		1.23088	1		1.06535	1		0.986382	1		0.989312	1		1.13901	1		0.958392	1		24.09	0.00896867	2	1329.69	6.93984	10.4074	0
Q5RK00	39S ribosomal protein L46, mitochondrial OS=Rattus norvegicus GN=Mrpl46 PE=2 SV=1 - [RM46_RAT]	35.7879	2.53	1	1	1	2	1.04561	2	4.71247	0.899344	2	7.11999	1.09096	2	3.13479	0.969674	2	4.58917	1.03361	2	9.53001	1.14034	2	13.3048	0.895907	2	8.01437	277	31.6535	7.44482
	A2	Sequence	# PSMs	# Proteins	# Protein Groups	Protein Group Accessions	Modifications	ΔCn	(115+116)/(113+114)	(115+116)/(113+114) Count	(115+116)/(113+114) Variability [%]	(117+118)/(113+114)	(117+118)/(113+114) Count	(117+118)/(113+114) Variability [%]	(119+121)/(113+114)	(119+121)/(113+114) Count	(119+121)/(113+114) Variability [%]	114/113	114/113 Count	114/113 Variability [%]	115/116	115/116 Count	115/116 Variability [%]	117/118	117/118 Count	117/118 Variability [%]	119/121	119/121 Count	119/121 Variability [%]	IonScore	Exp Value	Charge	MH+ [Da]	ΔM [ppm]	RT [min]	# Missed Cleavages
	High	aLDEAQR	2	1	1	Q5RK00	N-Term(iTRAQ8plex)	0	1.04561	2	4.71247	0.899344	2	7.11999	1.09096	2	3.13479	0.969674	2	4.58917	1.03361	2	9.53001	1.14034	2	13.3048	0.895907	2	8.01437	27.69	0.00459583	2	1106.61	-3.63657	10.9213	0
O70351	3-hydroxyacyl-CoA dehydrogenase type-2 OS=Rattus norvegicus GN=Hsd17b10 PE=1 SV=3 - [HCD2_RAT]	111.013	15.33	1	2	2	2	1.5013	2	34.1786	0.981969	2	16.2405	1.14643	1		1.0692	1		1.18614	2	24.8248	0.921083	1		1.06642	1		261	27.2286	8.77783
	A2	Sequence	# PSMs	# Proteins	# Protein Groups	Protein Group Accessions	Modifications	ΔCn	(115+116)/(113+114)	(115+116)/(113+114) Count	(115+116)/(113+114) Variability [%]	(117+118)/(113+114)	(117+118)/(113+114) Count	(117+118)/(113+114) Variability [%]	(119+121)/(113+114)	(119+121)/(113+114) Count	(119+121)/(113+114) Variability [%]	114/113	114/113 Count	114/113 Variability [%]	115/116	115/116 Count	115/116 Variability [%]	117/118	117/118 Count	117/118 Variability [%]	119/121	119/121 Count	119/121 Variability [%]	IonScore	Exp Value	Charge	MH+ [Da]	ΔM [ppm]	RT [min]	# Missed Cleavages
	High	lVGQGATAVLLDVPNSEGETEAk	1	1	1	O70351	N-Term(iTRAQ8plex); K23(iTRAQ8plex)	0	1.8786	1		0.880712	1								1.39885	1								67.22	1.88722e-06	3	2906.58	-3.80683	11.7245	0
	High	lVAGVMGQNEPDQGGQR	1	1	1	O70351	N-Term(iTRAQ8plex)	0	1.19978	1		1.09487	1		1.14643	1		1.0692	1		1.00578	1		0.921083	1		1.06642	1		64.33	1.49436e-06	2	2060.05	0.656144	12.1042	0
P13437	3-ketoacyl-CoA thiolase, mitochondrial OS=Rattus norvegicus GN=Acaa2 PE=1 SV=1 - [THIM_RAT]	185.144	9.57	1	3	3	5	1.3424	5	11.5137	1.42564	5	7.20942	1.10284	5	7.77037	0.882099	5	9.30168	1.03248	5	17.6797	1.24562	5	6.03184	0.953534	5	20.0805	397	41.8445	7.94287
	A2	Sequence	# PSMs	# Proteins	# Protein Groups	Protein Group Accessions	Modifications	ΔCn	(115+116)/(113+114)	(115+116)/(113+114) Count	(115+116)/(113+114) Variability [%]	(117+118)/(113+114)	(117+118)/(113+114) Count	(117+118)/(113+114) Variability [%]	(119+121)/(113+114)	(119+121)/(113+114) Count	(119+121)/(113+114) Variability [%]	114/113	114/113 Count	114/113 Variability [%]	115/116	115/116 Count	115/116 Variability [%]	117/118	117/118 Count	117/118 Variability [%]	119/121	119/121 Count	119/121 Variability [%]	IonScore	Exp Value	Charge	MH+ [Da]	ΔM [ppm]	RT [min]	# Missed Cleavages
	High	dFTATDLTEFAAR	2	1	1	P13437	N-Term(iTRAQ8plex)	0	1.34276	2	13.6422	1.36855	2	6.06466	1.07021	2	4.45563	0.910147	2	4.64333	1.01709	2	15.407	1.2245	2	3.49172	1.01966	2	9.9658	54.73	9.59058e-06	2	1761.89	-3.65248	13.2972	0
	High	lEDTLWAGLTDQHVk	1	1	1	P13437	N-Term(iTRAQ8plex); K15(iTRAQ8plex)	0	1.24242	1		1.4266	1		1.04662	1		0.870733	1		1.26629	1		1.24562	1		0.925656	1		52.98	4.10353e-05	3	2334.31	6.69136	10.5123	0
	High	iTAHLVHELR	2	1	1	P13437	N-Term(iTRAQ8plex)	0	1.34494	2	0.279789	1.44852	2	9.5828	1.31611	2	23.8568	0.959261	2	28.054	0.887319	2	22.7499	1.09051	2	31.3258	1.02832	2	51.7728	48.88	3.62375e-05	3	1492.89	-1.28813	9.2076	0
Q6DGG0	40 kDa peptidyl-prolyl cis-trans isomerase OS=Rattus norvegicus GN=Ppid PE=1 SV=3 - [PPID_RAT]	203.549	10.27	1	3	4	7	0.949443	6	15.5934	1.00478	6	20.1046	0.988287	6	17.76	0.865624	6	30.5255	1.00893	5	11.4498	1.10578	5	4.90778	0.968956	5	14.9875	370	40.7398	7.1665
	A2	Sequence	# PSMs	# Proteins	# Protein Groups	Protein Group Accessions	Modifications	ΔCn	(115+116)/(113+114)	(115+116)/(113+114) Count	(115+116)/(113+114) Variability [%]	(117+118)/(113+114)	(117+118)/(113+114) Count	(117+118)/(113+114) Variability [%]	(119+121)/(113+114)	(119+121)/(113+114) Count	(119+121)/(113+114) Variability [%]	114/113	114/113 Count	114/113 Variability [%]	115/116	115/116 Count	115/116 Variability [%]	117/118	117/118 Count	117/118 Variability [%]	119/121	119/121 Count	119/121 Variability [%]	IonScore	Exp Value	Charge	MH+ [Da]	ΔM [ppm]	RT [min]	# Missed Cleavages
	High	iVLELFADIVPk	3	1	1	Q6DGG0	N-Term(iTRAQ8plex); K12(iTRAQ8plex)	0	0.674217	3	69.1745	0.810171	3	53.2453	0.813386	3	72.0835	0.8548	3	26.6022	0.864	2	23.2987	0.990843	2	18.7907	1.2101	2	33.8638	61.81	2.37303e-06	2	1965.23	0.881623	7.25148	0
	High	iLLISEDLk	2	1	1	Q6DGG0	N-Term(iTRAQ8plex); K9(iTRAQ8plex)	0	1.01052	2	10.0021	1.09396	2	9.18115	1.02049	2	1.61464	0.750191	2	23.3959	1.09025	2	0.699585	1.00767	2	18.8438	0.934603	2	9.57431	47.29	7.3722e-05	3	1652.03	-6.7713	5.77095	0
	High	vFFDVDIGGER	1	1	1	Q6DGG0	N-Term(iTRAQ8plex)	0	0.95416	1		0.9817	1		0.967581	1		1.09917	1		0.934183	1		1.10578	1		0.824749	1		43.79	0.000125349	2	1557.82	-1.20914	23.8541	0
	High	tAEnFR	1	2	2	P10111;Q6DGG0	N-Term(iTRAQ8plex); N4(Deamidated)	0																						23.2	0.0102905	2	1042.54	-6.59789	12.909	0
P63326	40S ribosomal protein S10 OS=Rattus norvegicus GN=Rps10 PE=2 SV=1 - [RS10_RAT]	49.2	8.48	1	1	1	1	1.07475	1		0.982129	1		0.93862	1		1.01518	1		1.01732	1		1.2649	1		0.901205	1		165	18.9038	10.1548
	A2	Sequence	# PSMs	# Proteins	# Protein Groups	Protein Group Accessions	Modifications	ΔCn	(115+116)/(113+114)	(115+116)/(113+114) Count	(115+116)/(113+114) Variability [%]	(117+118)/(113+114)	(117+118)/(113+114) Count	(117+118)/(113+114) Variability [%]	(119+121)/(113+114)	(119+121)/(113+114) Count	(119+121)/(113+114) Variability [%]	114/113	114/113 Count	114/113 Variability [%]	115/116	115/116 Count	115/116 Variability [%]	117/118	117/118 Count	117/118 Variability [%]	119/121	119/121 Count	119/121 Variability [%]	IonScore	Exp Value	Charge	MH+ [Da]	ΔM [ppm]	RT [min]	# Missed Cleavages
	High	aEAGAGSATEFQFR	1	1	1	P63326	N-Term(iTRAQ8plex)	0	1.07475	1		0.982129	1		0.93862	1		1.01518	1		1.01732	1		1.2649	1		0.901205	1		49.2	2.88543e-05	2	1745.87	-1.63515	15.8532	0
P62282	40S ribosomal protein S11 OS=Rattus norvegicus GN=Rps11 PE=1 SV=3 - [RS11_RAT]	72.5853	6.33	1	1	1	2	1.05524	2	6.30495	0.982983	2	2.35235	1.05294	2	7.44627	0.891828	2	9.75819	1.05648	2	1.91448	1.31906	2	11.2907	0.844104	2	12.71	158	18.419	10.3013
	A2	Sequence	# PSMs	# Proteins	# Protein Groups	Protein Group Accessions	Modifications	ΔCn	(115+116)/(113+114)	(115+116)/(113+114) Count	(115+116)/(113+114) Variability [%]	(117+118)/(113+114)	(117+118)/(113+114) Count	(117+118)/(113+114) Variability [%]	(119+121)/(113+114)	(119+121)/(113+114) Count	(119+121)/(113+114) Variability [%]	114/113	114/113 Count	114/113 Variability [%]	115/116	115/116 Count	115/116 Variability [%]	117/118	117/118 Count	117/118 Variability [%]	119/121	119/121 Count	119/121 Variability [%]	IonScore	Exp Value	Charge	MH+ [Da]	ΔM [ppm]	RT [min]	# Missed Cleavages
	High	eAIEGTYIDk	2	1	1	P62282	N-Term(iTRAQ8plex); K10(iTRAQ8plex)	0	1.05524	2	6.30495	0.982983	2	2.35235	1.05294	2	7.44627	0.891828	2	9.75819	1.05648	2	1.91448	1.31906	2	11.2907	0.844104	2	12.71	52.82	4.20529e-05	2	1746.99	7.2114	14.4724	0
P63324	40S ribosomal protein S12 OS=Rattus norvegicus GN=Rps12 PE=1 SV=2 - [RS12_RAT]	54.4065	6.06	1	1	1	3	1.04972	3	6.99602	1.34804	3	12.2383	1.12179	3	7.24517	0.799184	3	13.3788	1.13544	3	2.98685	1.08447	3	10.2135	1.00306	3	16.8978	132	14.5156	7.23975
	A2	Sequence	# PSMs	# Proteins	# Protein Groups	Protein Group Accessions	Modifications	ΔCn	(115+116)/(113+114)	(115+116)/(113+114) Count	(115+116)/(113+114) Variability [%]	(117+118)/(113+114)	(117+118)/(113+114) Count	(117+118)/(113+114) Variability [%]	(119+121)/(113+114)	(119+121)/(113+114) Count	(119+121)/(113+114) Variability [%]	114/113	114/113 Count	114/113 Variability [%]	115/116	115/116 Count	115/116 Variability [%]	117/118	117/118 Count	117/118 Variability [%]	119/121	119/121 Count	119/121 Variability [%]	IonScore	Exp Value	Charge	MH+ [Da]	ΔM [ppm]	RT [min]	# Missed Cleavages
	High	dVIEEYFk	3	1	1	P63324	N-Term(iTRAQ8plex); K8(iTRAQ8plex)	0	1.04972	3	6.99602	1.34804	3	12.2383	1.12179	3	7.24517	0.799184	3	13.3788	1.13544	3	2.98685	1.08447	3	10.2135	1.00306	3	16.8978	34.58	0.00179394	2	1650.91	-5.954	11.4341	0
P62278	40S ribosomal protein S13 OS=Rattus norvegicus GN=Rps13 PE=2 SV=2 - [RS13_RAT]	66.9187	10.6	1	2	2	4	0.919276	4	17.0683	0.768521	4	3.97305	0.815588	4	10.0472	0.732281	4	23.791	0.919804	4	10.3671	1.20641	4	13.4285	0.840624	4	1.88011	151	17.2117	10.5356
	A2	Sequence	# PSMs	# Proteins	# Protein Groups	Protein Group Accessions	Modifications	ΔCn	(115+116)/(113+114)	(115+116)/(113+114) Count	(115+116)/(113+114) Variability [%]	(117+118)/(113+114)	(117+118)/(113+114) Count	(117+118)/(113+114) Variability [%]	(119+121)/(113+114)	(119+121)/(113+114) Count	(119+121)/(113+114) Variability [%]	114/113	114/113 Count	114/113 Variability [%]	115/116	115/116 Count	115/116 Variability [%]	117/118	117/118 Count	117/118 Variability [%]	119/121	119/121 Count	119/121 Variability [%]	IonScore	Exp Value	Charge	MH+ [Da]	ΔM [ppm]	RT [min]	# Missed Cleavages
	High	dSHGVAQVR	2	1	1	P62278	N-Term(iTRAQ8plex)	0	1.03059	2	4.13507	0.789386	2	3.143	0.872626	2	0.866329	0.857849	2	12.0498	0.889933	2	12.4541	1.32025	2	1.49836	0.732219	2	19.302	39.63	0.000631579	2	1272.7	-0.868505	9.55748	0
	High	lILIESR	2	1	1	P62278	N-Term(iTRAQ8plex)	0	0.573766	2	62.0507	0.48644	2	75.2416	0.552605	2	51.5647	0.400575	2	91.486	0.937518	2	10.3671	1.0699	2	5.9379	0.851351	2	0.53621	25.42	0.00373201	2	1147.73	-3.89535	8.17143	0
P13471	40S ribosomal protein S14 OS=Rattus norvegicus GN=Rps14 PE=2 SV=3 - [RS14_RAT]	156.633	9.27	1	2	2	6	1.33748	6	17.3182	1.06916	6	15.4419	1.16795	6	9.3884	0.993514	6	3.42924	0.993103	6	11.7258	1.07444	6	8.02928	0.960377	6	6.50926	151	16.2485	10.0522
	A2	Sequence	# PSMs	# Proteins	# Protein Groups	Protein Group Accessions	Modifications	ΔCn	(115+116)/(113+114)	(115+116)/(113+114) Count	(115+116)/(113+114) Variability [%]	(117+118)/(113+114)	(117+118)/(113+114) Count	(117+118)/(113+114) Variability [%]	(119+121)/(113+114)	(119+121)/(113+114) Count	(119+121)/(113+114) Variability [%]	114/113	114/113 Count	114/113 Variability [%]	115/116	115/116 Count	115/116 Variability [%]	117/118	117/118 Count	117/118 Variability [%]	119/121	119/121 Count	119/121 Variability [%]	IonScore	Exp Value	Charge	MH+ [Da]	ΔM [ppm]	RT [min]	# Missed Cleavages
	High	iEDVTPIPSDSTR	2	1	1	P13471	N-Term(iTRAQ8plex)	0	1.08286	2	10.1199	0.821976	2	27.3571	1.07114	2	8.77684	1.0162	2	2.19502	0.918054	2	8.33976	1.13376	2	8.75762	0.960377	2	4.67827	55.07	1.61809e-05	2	1733.92	-0.45268	18.6908	0
	High	iEDVTPIPSDSTRR	4	1	1	P13471	N-Term(iTRAQ8plex)	0	1.42515	4	7.78908	1.17422	4	13.9642	1.23274	4	9.3884	0.985283	4	8.31596	1.03956	4	11.7258	1.05762	4	6.62952	0.982766	4	9.94349	46.72	0.000162803	2	1890.04	8.73172	14.225	1
P62246	40S ribosomal protein S15a OS=Rattus norvegicus GN=Rps15a PE=1 SV=2 - [RS15A_RAT]	57.91	15.38	1	1	1	1	1.554	1		1.46597	1		1.45358	1		0.875146	1		1.03346	1		0.902953	1		1.09039	1		130	14.83	10.1255
	A2	Sequence	# PSMs	# Proteins	# Protein Groups	Protein Group Accessions	Modifications	ΔCn	(115+116)/(113+114)	(115+116)/(113+114) Count	(115+116)/(113+114) Variability [%]	(117+118)/(113+114)	(117+118)/(113+114) Count	(117+118)/(113+114) Variability [%]	(119+121)/(113+114)	(119+121)/(113+114) Count	(119+121)/(113+114) Variability [%]	114/113	114/113 Count	114/113 Variability [%]	115/116	115/116 Count	115/116 Variability [%]	117/118	117/118 Count	117/118 Variability [%]	119/121	119/121 Count	119/121 Variability [%]	IonScore	Exp Value	Charge	MH+ [Da]	ΔM [ppm]	RT [min]	# Missed Cleavages
	High	qFGFIVLTTSAGIMDHEEAR	1	1	1	P62246	N-Term(iTRAQ8plex)	0	1.554	1		1.46597	1		1.45358	1		0.875146	1		1.03346	1		0.902953	1		1.09039	1		57.91	8.73763e-06	3	2526.29	-4.30816	9.55678	0
P62250	40S ribosomal protein S16 OS=Rattus norvegicus GN=Rps16 PE=1 SV=2 - [RS16_RAT]	85.4007	12.33	1	2	2	4	1.08159	4	9.15253	1.13056	4	44.5337	1.03441	4	17.1239	0.872466	4	11.4519	1.04226	4	8.15295	1.17795	4	3.80733	0.956453	4	7.13196	146	16.435	10.2134
	A2	Sequence	# PSMs	# Proteins	# Protein Groups	Protein Group Accessions	Modifications	ΔCn	(115+116)/(113+114)	(115+116)/(113+114) Count	(115+116)/(113+114) Variability [%]	(117+118)/(113+114)	(117+118)/(113+114) Count	(117+118)/(113+114) Variability [%]	(119+121)/(113+114)	(119+121)/(113+114) Count	(119+121)/(113+114) Variability [%]	114/113	114/113 Count	114/113 Variability [%]	115/116	115/116 Count	115/116 Variability [%]	117/118	117/118 Count	117/118 Variability [%]	119/121	119/121 Count	119/121 Variability [%]	IonScore	Exp Value	Charge	MH+ [Da]	ΔM [ppm]	RT [min]	# Missed Cleavages
	High	lLEPVLLLGk	2	1	1	P62250	N-Term(iTRAQ8plex); K10(iTRAQ8plex)	0	1.15141	2	1.7092	1.5085	2	3.66822	1.2182	2	7.35537	0.775224	2	9.49074	1.13478	2	4.98294	1.16268	2	3.80733	0.896984	2	12.4968	41.7	6.74481e-05	2	1703.12	-7.3492	8.30888	0
	High	dILIQYDR	2	1	1	P62250	N-Term(iTRAQ8plex)	0	1.01697	2	1.56824	0.848585	2	3.44422	0.922348	2	0.0995482	0.942291	2	3.36482	0.986584	2	0.510216	1.27345	2	13.49	0.983883	2	7.13196	27.2	0.00685966	2	1339.75	-0.0645161	19.7762	0
P62271	40S ribosomal protein S18 OS=Rattus norvegicus GN=Rps18 PE=1 SV=3 - [RS18_RAT]	223.536	21.05	1	3	3	8	1.21216	8	13.638	0.921909	8	24.1235	1.05322	8	7.73787	0.957091	8	12.7753	1.00223	8	10.7136	1.13825	8	7.93126	0.989543	8	7.79028	152	17.7079	10.9897
	A2	Sequence	# PSMs	# Proteins	# Protein Groups	Protein Group Accessions	Modifications	ΔCn	(115+116)/(113+114)	(115+116)/(113+114) Count	(115+116)/(113+114) Variability [%]	(117+118)/(113+114)	(117+118)/(113+114) Count	(117+118)/(113+114) Variability [%]	(119+121)/(113+114)	(119+121)/(113+114) Count	(119+121)/(113+114) Variability [%]	114/113	114/113 Count	114/113 Variability [%]	115/116	115/116 Count	115/116 Variability [%]	117/118	117/118 Count	117/118 Variability [%]	119/121	119/121 Count	119/121 Variability [%]	IonScore	Exp Value	Charge	MH+ [Da]	ΔM [ppm]	RT [min]	# Missed Cleavages
	High	aGELTEDEVER	5	1	1	P62271	N-Term(iTRAQ8plex)	0	1.11346	5	9.0413	0.835436	5	7.20613	1.05293	5	2.0026	0.98741	5	5.5163	0.942941	5	6.13293	1.16003	5	6.78955	0.949754	5	4.78105	52.22	1.37952e-05	2	1551.77	-7.85892	16.2091	0
	High	iAFAITAIk	2	1	1	P62271	N-Term(iTRAQ8plex); K9(iTRAQ8plex)	0	1.30594	2	7.4904	1.43582	2	6.5473	1.28906	2	5.96524	0.729423	2	12.1282	1.2141	2	16.9868	1.08629	2	2.66465	1.02983	2	8.18037	39.75	0.000105674	2	1556.01	5.19069	7.27801	0
	High	ySQVLAnGLDNk	1	1	1	P62271	N-Term(iTRAQ8plex); N7(Deamidated); K12(iTRAQ8plex)	0	1.33723	1		1.37804	1		0.908918	1		0.904971	1		1.47935	1		1.3863	1		1.25896	1		30.37	0.00693341	3	1931.07	-0.192839	20.4411	0
P17074	40S ribosomal protein S19 OS=Rattus norvegicus GN=Rps19 PE=2 SV=3 - [RS19_RAT]	314.082	32.41	1	5	5	16	1.13451	16	6.934	1.16204	16	8.76337	1.06447	16	9.36554	0.832266	15	9.6459	1.10207	15	5.90878	1.20787	15	9.3542	0.911066	15	6.12296	145	16.0756	10.4038
	A2	Sequence	# PSMs	# Proteins	# Protein Groups	Protein Group Accessions	Modifications	ΔCn	(115+116)/(113+114)	(115+116)/(113+114) Count	(115+116)/(113+114) Variability [%]	(117+118)/(113+114)	(117+118)/(113+114) Count	(117+118)/(113+114) Variability [%]	(119+121)/(113+114)	(119+121)/(113+114) Count	(119+121)/(113+114) Variability [%]	114/113	114/113 Count	114/113 Variability [%]	115/116	115/116 Count	115/116 Variability [%]	117/118	117/118 Count	117/118 Variability [%]	119/121	119/121 Count	119/121 Variability [%]	IonScore	Exp Value	Charge	MH+ [Da]	ΔM [ppm]	RT [min]	# Missed Cleavages
	High	vLQALEGLk	3	1	1	P17074	N-Term(iTRAQ8plex); K9(iTRAQ8plex)	0	1.20444	3	0.598721	1.31174	3	12.0472	1.16229	3	11.3739	0.785083	3	0.970776	1.12704	3	2.58338	1.0529	3	4.92915	1.00953	3	3.9299	45.3	0.00011067	2	1578.99	-9.41744	4.26532	0
	High	eLAPYDENWFYTR	2	1	1	P17074	N-Term(iTRAQ8plex)	0	1.11948	2	6.96997	1.10308	2	7.61479	1.05469	2	14.9456	0.906719	2	3.53479	0.986571	2	4.32099	1.27146	2	9.62748	0.92146	2	1.41472	40.72	0.000199098	2	2007.98	2.47661	21.1232	0
	High	aLAAFLk	6	1	1	P17074	N-Term(iTRAQ8plex); K7(iTRAQ8plex)	0	1.09054	6	7.82258	1.12172	6	5.83966	1.08244	6	6.87217	0.772013	6	3.86328	1.11244	6	8.18482	1.22119	6	6.45031	0.880246	6	1.05671	35.62	0.000315281	2	1341.88	3.31684	5.03578	0
	High	dVNQQEFVR	4	1	1	P17074	N-Term(iTRAQ8plex)	0	1.12609	4	2.58532	1.14905	4	5.82432	1.03182	4	5.91995	0.994996	4	14.1494	1.07283	4	2.51146	1.23262	4	2.83527	0.87115	4	5.5463	34.31	0.00107497	2	1438.75	-7.90338	13.5684	0
	High	vPEWVDTVk	1	1	1	P17074	N-Term(iTRAQ8plex); K9(iTRAQ8plex)	0	0.549264	1		0.56777	1		0.539683	1														27.88	0.00985724	3	1680.97	-5.54867	6.23098	0
P27952	40S ribosomal protein S2 OS=Rattus norvegicus GN=Rps2 PE=1 SV=1 - [RS2_RAT]	181.259	5.46	1	2	2	13	1.15144	13	5.18877	1.05997	13	11.3361	1.19191	13	8.61943	0.81162	13	5.78344	1.07021	13	5.41539	1.0651	13	7.76148	0.951793	13	7.29697	293	31.2117	10.2427
	A2	Sequence	# PSMs	# Proteins	# Protein Groups	Protein Group Accessions	Modifications	ΔCn	(115+116)/(113+114)	(115+116)/(113+114) Count	(115+116)/(113+114) Variability [%]	(117+118)/(113+114)	(117+118)/(113+114) Count	(117+118)/(113+114) Variability [%]	(119+121)/(113+114)	(119+121)/(113+114) Count	(119+121)/(113+114) Variability [%]	114/113	114/113 Count	114/113 Variability [%]	115/116	115/116 Count	115/116 Variability [%]	117/118	117/118 Count	117/118 Variability [%]	119/121	119/121 Count	119/121 Variability [%]	IonScore	Exp Value	Charge	MH+ [Da]	ΔM [ppm]	RT [min]	# Missed Cleavages
	High	tQAPAVATT	1	1	1	P27952	N-Term(iTRAQ8plex)	0	1.14992	1		0.869698	1		0.787465	1		0.822834	1		1.06766	1		1.01086	1		1.07679	1		34.22	0.00170299	2	1163.65	-2.39133	11.5556	0
	High	gAIILAk	12	1	1	P27952	N-Term(iTRAQ8plex); K7(iTRAQ8plex)	0	1.15521	12	5.8456	1.06782	12	8.63623	1.20071	12	7.42515	0.801867	12	7.30791	1.09575	12	7.80758	1.06552	12	9.5658	0.943605	12	5.55999	31.38	0.000982503	2	1293.88	4.66637	10.5192	0
P05765	40S ribosomal protein S21 OS=Rattus norvegicus GN=Rps21 PE=1 SV=1 - [RS21_RAT]	148.47	13.25	1	2	2	7	1.11852	7	2.07393	1.33946	7	11.1557	1.22453	7	6.86364	1.03853	7	13.325	1.04164	7	13.7538	1.05319	7	16.7423	0.971366	7	8.51119	83	9.12154	8.51416
	A2	Sequence	# PSMs	# Proteins	# Protein Groups	Protein Group Accessions	Modifications	ΔCn	(115+116)/(113+114)	(115+116)/(113+114) Count	(115+116)/(113+114) Variability [%]	(117+118)/(113+114)	(117+118)/(113+114) Count	(117+118)/(113+114) Variability [%]	(119+121)/(113+114)	(119+121)/(113+114) Count	(119+121)/(113+114) Variability [%]	114/113	114/113 Count	114/113 Variability [%]	115/116	115/116 Count	115/116 Variability [%]	117/118	117/118 Count	117/118 Variability [%]	119/121	119/121 Count	119/121 Variability [%]	IonScore	Exp Value	Charge	MH+ [Da]	ΔM [ppm]	RT [min]	# Missed Cleavages
	High	mGESDDSILR	4	1	1	P05765	N-Term(iTRAQ8plex)	0	1.1111	4	0.800589	1.43758	4	1.13273	1.2767	4	0.488739	1.18535	4	5.78617	1.05986	4	5.28814	1.10683	4	8.32776	0.94393	4	4.2974	38.54	0.000258924	2	1426.7	-7.17162	14.7439	0
	High	mGESDDSILR	2	1	1	P05765	N-Term(iTRAQ8plex); M1(Oxidation)	0	1.28579	2	0.203394	0.598826	2	3.22188	0.669422	2	0.825275	0.951817	2	0.340161	0.813348	2	3.41796	0.780198	2	18.6738	1.29497	2	1.01612	38.05	0.000156675	2	1442.7	-9.15191	15.8321	0
	High	rMGESDDSILR	1	1	1	P05765	N-Term(iTRAQ8plex)	0	1.11852	1		1.25067	1		1.07171	1		1.00978	1		1.64869	1		1.34078	1		0.931889	1		36.01	0.000526283	3	1582.8	-8.04422	9.62213	1
P62850	40S ribosomal protein S24 OS=Rattus norvegicus GN=Rps24 PE=2 SV=1 - [RS24_RAT]	100.324	11.28	1	1	1	2	1.17734	2	14.8814	1.36835	2	4.98802	1.10749	2	14.9091	0.725445	2	17.6039	1.07604	2	5.59605	1.45294	2	36.0016	1.02795	2	1.11734	133	15.4134	10.7847
	A2	Sequence	# PSMs	# Proteins	# Protein Groups	Protein Group Accessions	Modifications	ΔCn	(115+116)/(113+114)	(115+116)/(113+114) Count	(115+116)/(113+114) Variability [%]	(117+118)/(113+114)	(117+118)/(113+114) Count	(117+118)/(113+114) Variability [%]	(119+121)/(113+114)	(119+121)/(113+114) Count	(119+121)/(113+114) Variability [%]	114/113	114/113 Count	114/113 Variability [%]	115/116	115/116 Count	115/116 Variability [%]	117/118	117/118 Count	117/118 Variability [%]	119/121	119/121 Count	119/121 Variability [%]	IonScore	Exp Value	Charge	MH+ [Da]	ΔM [ppm]	RT [min]	# Missed Cleavages
	High	tTGFGMIYDSLDYAk	2	1	1	P62850	N-Term(iTRAQ8plex); K15(iTRAQ8plex)	0	1.17734	2	14.8814	1.36835	2	4.98802	1.10749	2	14.9091	0.725445	2	17.6039	1.07604	2	5.59605	1.45294	2	36.0016	1.02795	2	1.11734	68.74	1.04254e-06	2	2290.2	5.83817	9.81403	0
P62853	40S ribosomal protein S25 OS=Rattus norvegicus GN=Rps25 PE=2 SV=1 - [RS25_RAT]	34.41	8.8	1	1	1	2	0.626699	2	51.0984	0.691518	2	30.362	0.571178	2	74.5577	1.13293	2	8.26607	1.43319	2	20.8166	1.19996	2	70.5863	1.33076	2	2.97357	125	13.7337	10.1108
	A2	Sequence	# PSMs	# Proteins	# Protein Groups	Protein Group Accessions	Modifications	ΔCn	(115+116)/(113+114)	(115+116)/(113+114) Count	(115+116)/(113+114) Variability [%]	(117+118)/(113+114)	(117+118)/(113+114) Count	(117+118)/(113+114) Variability [%]	(119+121)/(113+114)	(119+121)/(113+114) Count	(119+121)/(113+114) Variability [%]	114/113	114/113 Count	114/113 Variability [%]	115/116	115/116 Count	115/116 Variability [%]	117/118	117/118 Count	117/118 Variability [%]	119/121	119/121 Count	119/121 Variability [%]	IonScore	Exp Value	Charge	MH+ [Da]	ΔM [ppm]	RT [min]	# Missed Cleavages
	High	gGDAPAAGEDA	2	1	1	P62853	N-Term(iTRAQ8plex)	0	0.626699	2	51.0984	0.691518	2	30.362	0.571178	2	74.5577	1.13293	2	8.26607	1.43319	2	20.8166	1.19996	2	70.5863	1.33076	2	2.97357	23.93	0.00403618	2	1234.58	-0.483486	12.0594	0
P62982	40S ribosomal protein S27a OS=Rattus norvegicus GN=Rps27a PE=1 SV=1 - [RS27A_RAT]	103.3	23.75	1	1	1	3	1.17727	3	19.8338	1.20482	3	0.0910771	1.53032	3	7.01397	0.961821	3	25.1541	0.773933	3	2.60466	0.998974	3	34.5173	0.883552	3	1.51662	80	9.39787	9.83252
	A2	Sequence	# PSMs	# Proteins	# Protein Groups	Protein Group Accessions	Modifications	ΔCn	(115+116)/(113+114)	(115+116)/(113+114) Count	(115+116)/(113+114) Variability [%]	(117+118)/(113+114)	(117+118)/(113+114) Count	(117+118)/(113+114) Variability [%]	(119+121)/(113+114)	(119+121)/(113+114) Count	(119+121)/(113+114) Variability [%]	114/113	114/113 Count	114/113 Variability [%]	115/116	115/116 Count	115/116 Variability [%]	117/118	117/118 Count	117/118 Variability [%]	119/121	119/121 Count	119/121 Variability [%]	IonScore	Exp Value	Charge	MH+ [Da]	ΔM [ppm]	RT [min]	# Missed Cleavages
	High	ecPSDEcGAGVFMGSHFDR	3	1	1	P62982	N-Term(iTRAQ8plex); C2(Carbamidomethyl); C7(Carbamidomethyl)	0	1.17727	3	19.8338	1.20482	3	0.0910771	1.53032	3	7.01397	0.961821	3	25.1541	0.773933	3	2.60466	0.998974	3	34.5173	0.883552	3	1.51662	53.15	4.83025e-06	3	2462.05	0.472782	19.3193	0
P62859	40S ribosomal protein S28 OS=Rattus norvegicus GN=Rps28 PE=1 SV=1 - [RS28_RAT]	486.422	30.43	1	2	2	16	1.089	14	10.1519	1.0797	14	14.3785	1.10103	14	5.84936	1.00652	14	11.7491	1.00566	14	10.306	1.02648	14	5.47576	0.944892	14	7.21587	69	7.8362	10.6968
	A2	Sequence	# PSMs	# Proteins	# Protein Groups	Protein Group Accessions	Modifications	ΔCn	(115+116)/(113+114)	(115+116)/(113+114) Count	(115+116)/(113+114) Variability [%]	(117+118)/(113+114)	(117+118)/(113+114) Count	(117+118)/(113+114) Variability [%]	(119+121)/(113+114)	(119+121)/(113+114) Count	(119+121)/(113+114) Variability [%]	114/113	114/113 Count	114/113 Variability [%]	115/116	115/116 Count	115/116 Variability [%]	117/118	117/118 Count	117/118 Variability [%]	119/121	119/121 Count	119/121 Variability [%]	IonScore	Exp Value	Charge	MH+ [Da]	ΔM [ppm]	RT [min]	# Missed Cleavages
	High	eGDVLTLLESER	11	1	1	P62859	N-Term(iTRAQ8plex)	0	1.08645	9	3.74598	1.05865	9	7.69648	1.09607	9	4.64363	0.974914	9	10.9063	0.9916	9	8.09214	1.05178	9	9.64476	0.934864	9	5.0636	74.65	2.00519e-07	2	1664.91	6.33262	12.1037	0
	High	vEFMDDTSR	2	1	1	P62859	N-Term(iTRAQ8plex)	0	1.13829	2	6.64865	1.29973	2	3.15575	1.16261	2	4.09652	1.13	2	9.62056	1.06543	2	1.83175	1.00622	2	1.50294	0.999386	2	2.58774	26.35	0.00231191	2	1403.68	-0.84632	20.235	0
	High	vEFmDDTSR	3	1	1	P62859	N-Term(iTRAQ8plex); M4(Oxidation)	0	1.16615	3	4.47189	1.21049	3	9.46051	1.07502	3	28.2904	1.15607	3	3.35909	0.97317	3	15.7289	1.03659	3	10.6376	0.927952	3	32.1688	23.77	0.00418765	2	1419.66	-7.57321	18.6798	0
P62909	40S ribosomal protein S3 OS=Rattus norvegicus GN=Rps3 PE=2 SV=1 - [RS3_RAT]	402.44	23.87	1	5	5	18	1.20438	17	5.45117	0.984346	17	12.7651	1.06413	17	5.45616	0.903813	17	17.3902	0.95304	17	18.0982	1.2525	18	18.8368	0.983189	17	8.2852	243	26.6574	9.65674
	A2	Sequence	# PSMs	# Proteins	# Protein Groups	Protein Group Accessions	Modifications	ΔCn	(115+116)/(113+114)	(115+116)/(113+114) Count	(115+116)/(113+114) Variability [%]	(117+118)/(113+114)	(117+118)/(113+114) Count	(117+118)/(113+114) Variability [%]	(119+121)/(113+114)	(119+121)/(113+114) Count	(119+121)/(113+114) Variability [%]	114/113	114/113 Count	114/113 Variability [%]	115/116	115/116 Count	115/116 Variability [%]	117/118	117/118 Count	117/118 Variability [%]	119/121	119/121 Count	119/121 Variability [%]	IonScore	Exp Value	Charge	MH+ [Da]	ΔM [ppm]	RT [min]	# Missed Cleavages
	High	eLAEDGYSGVEVR	8	1	1	P62909	N-Term(iTRAQ8plex)	0	1.19281	7	3.10699	0.963813	7	12.8756	1.05805	7	3.2745	1.09014	7	7.42177	0.860115	8	11.2784	1.27002	8	11.3165	0.792802	7	29.9623	56.46	8.24694e-06	2	1727.89	9.33843	18.8019	0
	High	fGFPEGSVELYAEk	3	1	1	P62909	N-Term(iTRAQ8plex); K14(iTRAQ8plex)	0	1.21831	3	8.76198	1.14698	3	3.31352	0.893236	3	9.75934	0.697129	3	37.4559	1.17159	3	13.4783	1.46712	3	4.73644	0.991683	3	11.749	47.44	0.000136128	3	2181.17	0.147293	17.7433	0
	High	dEILPTTPISEQk	2	1	1	P62909	N-Term(iTRAQ8plex); K13(iTRAQ8plex)	0	0.624716	2	70.7283	0.941184	2	16.6785	0.874227	2	29.7742	0.937236	2	6.47319	1.15151	1		1.23668	2	0.133671	0.831669	2	32.452	43.22	0.000373998	3	2079.18	0.799895	18.6487	0
	High	tEIIILATR	4	1	1	P62909	N-Term(iTRAQ8plex)	0	1.23385	4	1.99361	0.930812	4	2.21898	1.10572	4	5.03264	0.912646	4	4.85998	1.08837	4	3.01596	1.0594	4	1.93002	1.00654	4	3.64266	29.11	0.00282311	2	1333.83	-0.68742	13.4838	0
	High	aELNEFLTR	1	1	1	P62909	N-Term(iTRAQ8plex)	0	1.27312	1		1.29716	1		1.23338	1		0.890367	1		1.05773	1		1.36311	1		1.09924	1		24.7	0.00965706	2	1396.77	-2.06883	8.16907	0
P49242	40S ribosomal protein S3a OS=Rattus norvegicus GN=Rps3a PE=1 SV=2 - [RS3A_RAT]	161.568	14.39	1	3	3	5	1.03494	5	6.45075	0.929143	5	17.0493	1.09086	5	2.10314	0.797818	5	6.43166	0.916537	5	21.9981	1.1777	5	10.5347	0.844283	5	4.04885	264	29.9257	9.72998
	A2	Sequence	# PSMs	# Proteins	# Protein Groups	Protein Group Accessions	Modifications	ΔCn	(115+116)/(113+114)	(115+116)/(113+114) Count	(115+116)/(113+114) Variability [%]	(117+118)/(113+114)	(117+118)/(113+114) Count	(117+118)/(113+114) Variability [%]	(119+121)/(113+114)	(119+121)/(113+114) Count	(119+121)/(113+114) Variability [%]	114/113	114/113 Count	114/113 Variability [%]	115/116	115/116 Count	115/116 Variability [%]	117/118	117/118 Count	117/118 Variability [%]	119/121	119/121 Count	119/121 Variability [%]	IonScore	Exp Value	Charge	MH+ [Da]	ΔM [ppm]	RT [min]	# Missed Cleavages
	High	vFEVSLADLQNDEVAFR	1	1	1	P49242	N-Term(iTRAQ8plex)	0	0.97743	1		0.833464	1		1.06483	1		1.13125	1		0.717016	1		1.09714	1		0.843764	1		84.53	2.14946e-08	2	2256.17	-6.70781	14.7293	0
	High	lITEDVQGk	2	1	1	P49242	N-Term(iTRAQ8plex); K9(iTRAQ8plex)	0	1.11533	2	17.6701	1.29885	2	7.69387	1.1222	2	5.87859	0.741168	2	17.2213	1.07203	2	1.4942	1.30283	2	3.9411	0.832838	2	2.0238	44.28	0.000294868	2	1610.97	7.32013	12.8797	0
	High	aDGyEPPVQESV	2	1	1	P49242	N-Term(iTRAQ8plex); Y4(iTRAQ8plex)	0	1.0435	2	1.22079	0.877587	2	8.47885	1.09862	2	1.05148	0.780717	2	3.21334	0.916043	2	0.0799956	1.14096	2	4.70149	1.00987	2	0.575376	40.31	0.000442276	2	1898.98	-9.23463	12.979	0
P62703	40S ribosomal protein S4, X isoform OS=Rattus norvegicus GN=Rps4x PE=2 SV=2 - [RS4X_RAT]	593.726	19.77	1	5	5	32	1.10903	24	5.89597	1.1634	23	11.5143	1.10806	24	10.1905	0.887579	23	5.21267	1.07181	24	12.0251	1.07846	23	13.7323	0.90418	23	8.74377	263	29.5791	10.1548
	A2	Sequence	# PSMs	# Proteins	# Protein Groups	Protein Group Accessions	Modifications	ΔCn	(115+116)/(113+114)	(115+116)/(113+114) Count	(115+116)/(113+114) Variability [%]	(117+118)/(113+114)	(117+118)/(113+114) Count	(117+118)/(113+114) Variability [%]	(119+121)/(113+114)	(119+121)/(113+114) Count	(119+121)/(113+114) Variability [%]	114/113	114/113 Count	114/113 Variability [%]	115/116	115/116 Count	115/116 Variability [%]	117/118	117/118 Count	117/118 Variability [%]	119/121	119/121 Count	119/121 Variability [%]	IonScore	Exp Value	Charge	MH+ [Da]	ΔM [ppm]	RT [min]	# Missed Cleavages
	High	vNDTIQIDLETGk	4	1	1	P62703	N-Term(iTRAQ8plex); K13(iTRAQ8plex)	0	1.17468	3	17.7382	1.27796	2	5.0224	1.17067	3	6.12552	0.897189	2	1.38106	1.14574	3	19.2724	1.15686	2	11.082	0.948561	2	0.145276	72.76	4.36972e-07	2	2054.15	-3.81211	21.248	0
	High	gIPHLVTHDAR	9	1	1	P62703	N-Term(iTRAQ8plex)	0	1.1204	9	2.53486	1.17857	9	10.9201	1.11032	9	9.602	0.882283	9	3.96006	1.18265	9	5.45959	1.06108	9	9.11161	0.908944	9	3.39318	59.86	5.37036e-06	2	1519.86	-6.358	8.1422	0
	High	yALTGDEVk	2	1	1	P62703	N-Term(iTRAQ8plex); K9(iTRAQ8plex)	0	1.25144	2	11.8857	1.18842	2	6.46312	1.11226	2	3.68531	0.774466	2	10.4501	1.1688	2	4.16846	1.34897	2	13.7456	1.00728	2	30.995	41.84	0.000409148	3	1603.91	-4.39308	9.78818	0
	High	dAnGNSFATR	16	1	1	P62703	N-Term(iTRAQ8plex); N3(Deamidated)	0	1.0707	9	4.99963	1.03939	9	0.887834	1.02755	9	5.64758	0.887579	9	9.89455	1.03084	9	3.4376	1.07846	9	30.8942	0.862657	9	5.45519	27.12	0.00193629	2	1357.66	-3.43339	14.5425	0
	High	lSNIFVIGk	1	1	1	P62703	N-Term(iTRAQ8plex); K9(iTRAQ8plex)	0	1.19076	1		1.36172	1		1.26796	1		0.914166	1		1.08888	1		1.18261	1		1.03477	1		22.31	0.00646238	2	1599.02	6.07439	4.55737	0
P62755	40S ribosomal protein S6 OS=Rattus norvegicus GN=Rps6 PE=1 SV=1 - [RS6_RAT]	313.964	14.06	1	3	3	14	1.07284	14	7.24182	0.944182	14	7.39628	1.06061	14	5.12713	0.949095	14	7.70704	0.976653	14	6.97145	1.25649	14	7.00466	0.916389	14	10.8106	249	28.663	10.8433
	A2	Sequence	# PSMs	# Proteins	# Protein Groups	Protein Group Accessions	Modifications	ΔCn	(115+116)/(113+114)	(115+116)/(113+114) Count	(115+116)/(113+114) Variability [%]	(117+118)/(113+114)	(117+118)/(113+114) Count	(117+118)/(113+114) Variability [%]	(119+121)/(113+114)	(119+121)/(113+114) Count	(119+121)/(113+114) Variability [%]	114/113	114/113 Count	114/113 Variability [%]	115/116	115/116 Count	115/116 Variability [%]	117/118	117/118 Count	117/118 Variability [%]	119/121	119/121 Count	119/121 Variability [%]	IonScore	Exp Value	Charge	MH+ [Da]	ΔM [ppm]	RT [min]	# Missed Cleavages
	High	mATEVAADALGEEWk	2	1	1	P62755	N-Term(iTRAQ8plex); K15(iTRAQ8plex)	0	0.970853	2	25.4721	0.760933	2	0.509614	0.91604	2	21.119	0.981845	2	6.43415	1.04831	2	31.5348	1.31674	2	23.1297	1.33168	2	1.82915	54.92	2.60907e-05	3	2229.18	3.29717	23.7	0
	High	dIPGLTDTTVPR	5	1	1	P62755	N-Term(iTRAQ8plex)	0	1.07682	5	8.59119	0.944979	5	1.20954	1.06662	5	3.45584	0.958086	5	6.26733	0.999551	5	9.18956	1.32549	5	7.33943	0.883405	5	4.5128	47.81	9.76904e-05	2	1588.88	-0.0882044	21.9837	0
	High	lIEVDDER	7	1	1	P62755	N-Term(iTRAQ8plex)	0	1.06887	7	4.46741	0.950234	7	9.95368	1.09694	7	4.32345	0.920535	7	8.006	0.970746	7	5.78209	1.21754	7	5.16159	0.922121	7	9.97604	47.02	0.000110228	2	1292.71	8.2289	18.5571	0
P62083	40S ribosomal protein S7 OS=Rattus norvegicus GN=Rps7 PE=1 SV=1 - [RS7_RAT]	170.15	23.2	1	3	3	6	1.225	3	25.5401	1.24806	3	1.66902	1.20355	3	14.8295	0.928414	3	2.29548	0.991945	3	7.67135	1.21402	3	2.32712	0.902677	3	6.68782	194	22.1133	10.0962
	A2	Sequence	# PSMs	# Proteins	# Protein Groups	Protein Group Accessions	Modifications	ΔCn	(115+116)/(113+114)	(115+116)/(113+114) Count	(115+116)/(113+114) Variability [%]	(117+118)/(113+114)	(117+118)/(113+114) Count	(117+118)/(113+114) Variability [%]	(119+121)/(113+114)	(119+121)/(113+114) Count	(119+121)/(113+114) Variability [%]	114/113	114/113 Count	114/113 Variability [%]	115/116	115/116 Count	115/116 Variability [%]	117/118	117/118 Count	117/118 Variability [%]	119/121	119/121 Count	119/121 Variability [%]	IonScore	Exp Value	Charge	MH+ [Da]	ΔM [ppm]	RT [min]	# Missed Cleavages
	High	dVNFEFPEFQL	2	1	1	P62083	N-Term(iTRAQ8plex)	0	1.33672	2	12.9942	1.29359	2	5.31615	1.37328	2	19.7477	0.935628	2	1.14763	0.958636	2	5.06735	1.17419	2	4.94871	0.885543	2	9.54329	59.65	1.73428e-06	2	1688.84	-5.15778	22.3895	0
	High	tLTAVHDAILEDLVFPSEIVGk	3	1	1	P62083	N-Term(iTRAQ8plex); K22(iTRAQ8plex)	0																						54.47	3.67991e-05	3	2975.67	-6.15372	10.1166	0
	High	aIIIFVPVPQLk	1	1	1	P62083	N-Term(iTRAQ8plex); K12(iTRAQ8plex)	0	1.03395	1		1.23409	1		1.08959	1		0.760719	1		1.04454	1		1.23323	1		0.902677	1		51.8	8.91936e-06	2	1946.25	-8.10554	9.91029	0
P62243	40S ribosomal protein S8 OS=Rattus norvegicus GN=Rps8 PE=1 SV=2 - [RS8_RAT]	383.111	26.44	1	5	5	14	1.18044	14	18.0903	1.08785	14	31.416	1.15232	14	15.1944	0.861347	13	18.9469	1.03392	13	13.3889	1.1302	13	9.63205	0.929517	14	10.3118	208	24.1902	10.3159
	A2	Sequence	# PSMs	# Proteins	# Protein Groups	Protein Group Accessions	Modifications	ΔCn	(115+116)/(113+114)	(115+116)/(113+114) Count	(115+116)/(113+114) Variability [%]	(117+118)/(113+114)	(117+118)/(113+114) Count	(117+118)/(113+114) Variability [%]	(119+121)/(113+114)	(119+121)/(113+114) Count	(119+121)/(113+114) Variability [%]	114/113	114/113 Count	114/113 Variability [%]	115/116	115/116 Count	115/116 Variability [%]	117/118	117/118 Count	117/118 Variability [%]	119/121	119/121 Count	119/121 Variability [%]	IonScore	Exp Value	Charge	MH+ [Da]	ΔM [ppm]	RT [min]	# Missed Cleavages
	High	iSSLLEEQFQQGk	5	1	1	P62243	N-Term(iTRAQ8plex); K13(iTRAQ8plex)	0	1.18097	5	14.3052	1.27199	5	12.9121	1.21527	5	8.88041	0.662876	5	19.9155	1.16492	5	19.409	1.07541	5	2.24209	1.00232	5	14.6235	72.01	4.91015e-07	2	2115.2	4.65949	8.76856	0
	High	iIDVVYNASNNELVR	3	1	1	P62243	N-Term(iTRAQ8plex)	0	1.22177	3	0.348122	0.873695	3	4.44453	1.13696	3	3.0914	1.03352	2	2.63339	0.943232	2	1.1092	1.04067	2	0.68387	0.986837	3	11.4455	62.77	3.72554e-06	2	2023.1	-7.30334	6.58165	0
	High	aDGYVLEGk	3	1	1	P62243	N-Term(iTRAQ8plex); K9(iTRAQ8plex)	0	1.04058	3	0.945407	0.93098	3	12.588	1.03525	3	2.90352	0.910286	3	1.4563	0.929459	3	15.8899	1.19363	3	8.1094	0.94366	3	10.7267	46.67	0.000127014	2	1559.9	7.83341	14.2689	0
	High	lTPEEEEILNk	1	1	1	P62243	N-Term(iTRAQ8plex); K11(iTRAQ8plex)	0	1.22192	1		1.41078	1		1.26928	1		0.748897	1		1.03859	1		1.20022	1		0.73156	1		32.26	0.0036549	2	1923.09	0.954137	18.733	0
	High	eLEFYLR	2	1	1	P62243	N-Term(iTRAQ8plex)	0	0.979009	2	0.28586	0.81047	2	6.36254	0.924759	2	4.89695	0.960372	2	2.64639	1.08116	2	6.71362	1.22928	2	1.25825	0.893772	2	3.576	26.24	0.00760589	2	1273.71	-1.6317	12.0413	0
P29314	40S ribosomal protein S9 OS=Rattus norvegicus GN=Rps9 PE=1 SV=4 - [RS9_RAT]	118.435	7.73	1	2	2	6	1.44902	6	10.9527	1.70697	6	15.0989	1.69401	6	9.09232	0.659535	6	12.814	0.945481	6	13.5691	1.29816	6	6.67473	0.761066	6	2.99817	194	22.5776	10.6528
	A2	Sequence	# PSMs	# Proteins	# Protein Groups	Protein Group Accessions	Modifications	ΔCn	(115+116)/(113+114)	(115+116)/(113+114) Count	(115+116)/(113+114) Variability [%]	(117+118)/(113+114)	(117+118)/(113+114) Count	(117+118)/(113+114) Variability [%]	(119+121)/(113+114)	(119+121)/(113+114) Count	(119+121)/(113+114) Variability [%]	114/113	114/113 Count	114/113 Variability [%]	115/116	115/116 Count	115/116 Variability [%]	117/118	117/118 Count	117/118 Variability [%]	119/121	119/121 Count	119/121 Variability [%]	IonScore	Exp Value	Charge	MH+ [Da]	ΔM [ppm]	RT [min]	# Missed Cleavages
	High	iEDFLER	4	1	1	P29314	N-Term(iTRAQ8plex)	0	1.53898	4	8.94811	1.78212	4	6.39411	1.79643	4	9.09232	0.659535	4	11.1777	0.945481	4	9.0255	1.35703	4	8.47877	0.761066	4	1.40599	41.51	0.000173048	2	1225.68	5.86783	9.86393	0
	High	iGVLDEGk	2	1	1	P29314	N-Term(iTRAQ8plex); K8(iTRAQ8plex)	0	1.14068	2	31.3196	1.41038	2	8.70864	1.44061	2	24.6978	0.651015	2	18.7002	0.847884	2	29.8579	1.25698	2	2.9833	0.781594	2	19.2936	31.39	0.00668017	2	1438.87	-1.50978	10.2844	0
P38983	40S ribosomal protein SA OS=Rattus norvegicus GN=Rpsa PE=1 SV=3 - [RSSA_RAT]	260.688	8.47	1	2	2	6	1.15178	6	11.0925	1.06128	6	9.39756	1.16384	6	4.88199	0.959718	6	17.3202	0.890806	6	21.838	1.02371	6	13.7445	0.986477	6	10.68	295	32.8034	4.86865
	A2	Sequence	# PSMs	# Proteins	# Protein Groups	Protein Group Accessions	Modifications	ΔCn	(115+116)/(113+114)	(115+116)/(113+114) Count	(115+116)/(113+114) Variability [%]	(117+118)/(113+114)	(117+118)/(113+114) Count	(117+118)/(113+114) Variability [%]	(119+121)/(113+114)	(119+121)/(113+114) Count	(119+121)/(113+114) Variability [%]	114/113	114/113 Count	114/113 Variability [%]	115/116	115/116 Count	115/116 Variability [%]	117/118	117/118 Count	117/118 Variability [%]	119/121	119/121 Count	119/121 Variability [%]	IonScore	Exp Value	Charge	MH+ [Da]	ΔM [ppm]	RT [min]	# Missed Cleavages
	High	aIVAIENPADVSVISSR	5	1	1	P38983	N-Term(iTRAQ8plex)	0	1.12769	5	10.083	1.0961	5	9.59507	1.17492	5	4.99974	1.0361	5	6.84258	0.919494	5	21.9101	1.02842	5	15.8803	0.99623	5	11.6531	83.66	2.99216e-08	2	2045.15	-1.26555	9.75363	0
	High	lLVVTDPR	1	1	1	P38983	N-Term(iTRAQ8plex)	0	1.24499	1		1.00131	1		1.15286	1		0.888965	1		0.863013	1		0.94247	1		0.97682	1		37.33	0.000739707	2	1216.75	-1.65607	9.57221	0
Q91ZS3	45 kDa calcium-binding protein OS=Rattus norvegicus GN=Sdf4 PE=1 SV=1 - [CAB45_RAT]	39.8803	1.94	1	1	1	2	1.34108	2	3.08621	1.34219	2	2.26078	1.33638	2	0.73395	0.912294	2	10.1408	1.02548	2	11.4033	0.839221	2	9.52023	1.06938	2	6.62874	361	42.0485	4.98291
	A2	Sequence	# PSMs	# Proteins	# Protein Groups	Protein Group Accessions	Modifications	ΔCn	(115+116)/(113+114)	(115+116)/(113+114) Count	(115+116)/(113+114) Variability [%]	(117+118)/(113+114)	(117+118)/(113+114) Count	(117+118)/(113+114) Variability [%]	(119+121)/(113+114)	(119+121)/(113+114) Count	(119+121)/(113+114) Variability [%]	114/113	114/113 Count	114/113 Variability [%]	115/116	115/116 Count	115/116 Variability [%]	117/118	117/118 Count	117/118 Variability [%]	119/121	119/121 Count	119/121 Variability [%]	IonScore	Exp Value	Charge	MH+ [Da]	ΔM [ppm]	RT [min]	# Missed Cleavages
	High	vDVnTDR	2	1	1	Q91ZS3	N-Term(iTRAQ8plex); N4(Deamidated)	0	1.34108	2	3.08621	1.34219	2	2.26078	1.33638	2	0.73395	0.912294	2	10.1408	1.02548	2	11.4033	0.839221	2	9.52023	1.06938	2	6.62874	28.47	0.00362694	2	1123.58	-6.44567	15.7741	0
Q794F9	4F2 cell-surface antigen heavy chain OS=Rattus norvegicus GN=Slc3a2 PE=1 SV=1 - [4F2_RAT]	232.45	4.55	1	2	2	8	1.22559	5	8.89567	1.42778	6	11.9121	1.31691	6	18.365	0.956824	6	20.1817	1.07559	5	1.35035	1.13222	6	8.60859	0.972946	5	14.6705	527	58.0361	5.32568
	A2	Sequence	# PSMs	# Proteins	# Protein Groups	Protein Group Accessions	Modifications	ΔCn	(115+116)/(113+114)	(115+116)/(113+114) Count	(115+116)/(113+114) Variability [%]	(117+118)/(113+114)	(117+118)/(113+114) Count	(117+118)/(113+114) Variability [%]	(119+121)/(113+114)	(119+121)/(113+114) Count	(119+121)/(113+114) Variability [%]	114/113	114/113 Count	114/113 Variability [%]	115/116	115/116 Count	115/116 Variability [%]	117/118	117/118 Count	117/118 Variability [%]	119/121	119/121 Count	119/121 Variability [%]	IonScore	Exp Value	Charge	MH+ [Da]	ΔM [ppm]	RT [min]	# Missed Cleavages
	High	vAEDEAEAGVk	3	1	1	Q794F9	N-Term(iTRAQ8plex); K11(iTRAQ8plex)	0	1.22559	3	1.37635	1.53018	3	7.31886	1.36546	3	1.23907	0.921113	3	1.83795	1.07559	3	1.35035	1.16558	3	6.11676	0.88192	3	14.3602	68.58	6.58709e-07	2	1725.93	-9.2106	13.4373	0
	High	iGDLQAFVGPEAR	5	1	1	Q794F9	N-Term(iTRAQ8plex)	0	1.26833	2	14.0297	1.36634	3	6.95903	1.27008	3	36.3045	0.993919	3	31.378	0.990348	2	12.342	1.05909	3	17.3131	1.09503	2	2.93375	49.26	8.41896e-05	2	1676.93	0.0205512	20.2709	0
Q9JLJ3	4-trimethylaminobutyraldehyde dehydrogenase OS=Rattus norvegicus GN=Aldh9a1 PE=1 SV=1 - [AL9A1_RAT]	73.2017	4.25	1	2	2	3	1.25097	3	6.26826	1.47518	3	14.2774	1.27523	3	15.2957	0.886637	3	6.56103	0.910997	3	21.8992	1.19606	3	8.82218	1.00771	3	26.9317	494	53.618	6.91748
	A2	Sequence	# PSMs	# Proteins	# Protein Groups	Protein Group Accessions	Modifications	ΔCn	(115+116)/(113+114)	(115+116)/(113+114) Count	(115+116)/(113+114) Variability [%]	(117+118)/(113+114)	(117+118)/(113+114) Count	(117+118)/(113+114) Variability [%]	(119+121)/(113+114)	(119+121)/(113+114) Count	(119+121)/(113+114) Variability [%]	114/113	114/113 Count	114/113 Variability [%]	115/116	115/116 Count	115/116 Variability [%]	117/118	117/118 Count	117/118 Variability [%]	119/121	119/121 Count	119/121 Variability [%]	IonScore	Exp Value	Charge	MH+ [Da]	ΔM [ppm]	RT [min]	# Missed Cleavages
	High	vEPVDASGTEk	1	1	1	Q9JLJ3	N-Term(iTRAQ8plex); K11(iTRAQ8plex)	0	1.25097	1		1.62351	1		1.41297	1		0.886637	1		0.910997	1		1.1271	1		0.804111	1		45.97	0.000123936	2	1739.95	-8.44344	13.7875	0
	High	iGDPLLEDTR	2	1	1	Q9JLJ3	N-Term(iTRAQ8plex)	0	1.22532	2	9.35484	1.35968	2	12.131	1.17177	2	12.5936	0.837678	2	15.0598	0.902285	2	23.3783	1.35668	2	18.8458	1.10177	2	13.289	31.96	0.0034387	2	1432.8	0.523868	21.3362	0
Q6Q0N3	5'-nucleotidase domain-containing protein 2 OS=Rattus norvegicus GN=Nt5dc2 PE=2 SV=2 - [NT5D2_RAT]	47.8522	3.07	1	2	2	2	0.881847	2	12.8201	0.764904	2	1.80722	0.814593	2	2.37986	0.926922	2	25.8185	0.880687	2	27.6647	1.1553	2	2.50859	0.891212	2	1.35646	553	63.6119	7.1665
	A2	Sequence	# PSMs	# Proteins	# Protein Groups	Protein Group Accessions	Modifications	ΔCn	(115+116)/(113+114)	(115+116)/(113+114) Count	(115+116)/(113+114) Variability [%]	(117+118)/(113+114)	(117+118)/(113+114) Count	(117+118)/(113+114) Variability [%]	(119+121)/(113+114)	(119+121)/(113+114) Count	(119+121)/(113+114) Variability [%]	114/113	114/113 Count	114/113 Variability [%]	115/116	115/116 Count	115/116 Variability [%]	117/118	117/118 Count	117/118 Variability [%]	119/121	119/121 Count	119/121 Variability [%]	IonScore	Exp Value	Charge	MH+ [Da]	ΔM [ppm]	RT [min]	# Missed Cleavages
	High	mQTYQDAESR	1	1	1	Q6Q0N3	N-Term(iTRAQ8plex)	0	0.961156	1		0.755638	1		0.827772	1		1.10016	1		1.05772	1		1.13592	1		0.899403	1		36.04	0.000248296	2	1532.72	-8.00756	11.4709	0
	High	dVTDAIR	1	1	1	Q6Q0N3	N-Term(iTRAQ8plex)	0	0.809082	1		0.774284	1		0.801623	1		0.780963	1		0.733286	1		1.17501	1		0.883095	1		27.16	0.0063462	2	1093.61	-8.13484	15.2836	0
P63039	60 kDa heat shock protein, mitochondrial OS=Rattus norvegicus GN=Hspd1 PE=1 SV=1 - [CH60_RAT]	627.868	19.02	1	9	9	24	0.910236	23	10.4289	1.04339	23	16.66	0.921363	23	10.1296	0.985298	23	16.794	0.997753	23	16.3512	1.13624	23	19.521	0.918291	22	20.6872	573	60.9174	6.17627
	A2	Sequence	# PSMs	# Proteins	# Protein Groups	Protein Group Accessions	Modifications	ΔCn	(115+116)/(113+114)	(115+116)/(113+114) Count	(115+116)/(113+114) Variability [%]	(117+118)/(113+114)	(117+118)/(113+114) Count	(117+118)/(113+114) Variability [%]	(119+121)/(113+114)	(119+121)/(113+114) Count	(119+121)/(113+114) Variability [%]	114/113	114/113 Count	114/113 Variability [%]	115/116	115/116 Count	115/116 Variability [%]	117/118	117/118 Count	117/118 Variability [%]	119/121	119/121 Count	119/121 Variability [%]	IonScore	Exp Value	Charge	MH+ [Da]	ΔM [ppm]	RT [min]	# Missed Cleavages
	High	aAVEEGIVLGGGcALLR	10	1	1	P63039	N-Term(iTRAQ8plex); C13(Carbamidomethyl)	0	0.919991	9	8.85547	1.04339	9	15.07	0.922366	9	7.26531	1.08672	9	10.1422	0.913054	9	3.32278	1.13459	9	17.8285	0.874232	9	6.59778	64.2	3.02251e-06	3	1989.11	0.293014	12.9752	0
	High	nAGVEGSLIVEk	2	1	1	P63039	N-Term(iTRAQ8plex); K12(iTRAQ8plex)	0	0.961369	2	2.28801	1.10158	2	8.51505	0.742261	2	28.038	0.848849	2	9.1356	1.28052	2	7.56042	0.911929	2	33.4905	0.934445	1		62.82	3.99633e-06	2	1824.07	-1.11471	12.9592	0
	High	tVIIEQSWGSPk	1	1	1	P63039	N-Term(iTRAQ8plex); K12(iTRAQ8plex)	0	0.912733	1		1.14104	1		0.950967	1		0.858267	1		1.03856	1		1.15266	1		1.10969	1		47.07	0.000188483	2	1953.12	-1.53014	9.47401	0
	High	gVMLAVDAVIAELk	2	1	1	P63039	N-Term(iTRAQ8plex); K14(iTRAQ8plex)	0	0.703745	2	2.07505	0.982888	2	13.3221	0.854493	2	20.7145	0.59278	2	51.148	0.788069	2	44.2311	1.18196	2	17.9902	1.03818	2	74.4572	43.2	0.000232136	3	2037.23	1.45271	6.63347	0
	High	tLNDELEIIEGMk	2	1	1	P63039	N-Term(iTRAQ8plex); K13(iTRAQ8plex)	0	0.743226	2	3.91703	1.01897	2	36.1398	0.805955	2	30.204	0.692207	2	45.2764	0.943109	2	24.5454	1.08774	2	12.9258	0.904872	2	31.7581	42.3	0.000482852	3	2113.18	7.33966	15.6851	0
	High	vTDALnATR	2	1	1	P63039	N-Term(iTRAQ8plex); N6(Deamidated)	0	0.888477	2	1.12674	0.895147	2	2.56318	0.862241	2	2.98209	1.02102	2	4.52662	0.922533	2	5.03347	0.968665	2	7.44166	1.04577	2	3.63661	41.42	0.000310076	2	1265.71	7.66466	16.4173	0
	High	vGGTSDVEVNEk	2	1	1	P63039	N-Term(iTRAQ8plex); K12(iTRAQ8plex)	0	1.00364	2	9.80039	1.20159	2	24.1227	1.01433	2	25.8591	1.07252	2	26.6592	0.823525	2	20.2387	1.39952	2	9.86267	0.914036	2	69.4637	37.57	0.000971165	3	1841.99	-8.12763	12.6425	0
	High	cEFQDAYVLLSEk	2	1	1	P63039	N-Term(iTRAQ8plex); C1(Carbamidomethyl); K13(iTRAQ8plex)	0	0.911229	2	15.401	1.1745	2	19.3023	0.873861	2	18.0971	0.976457	2	18.9346	1.10479	2	10.6092	1.21772	2	26.5057	0.844644	2	31.7222	36.81	0.00155295	3	2210.18	8.40522	9.71264	0
	High	dDAMLLk	1	1	1	P63039	N-Term(iTRAQ8plex); K7(iTRAQ8plex)	0	0.834439	1		1.38109	1		0.91219	1		0.922118	1		1.1661	1		1.46063	1		0.85845	1		33.02	0.00224498	2	1413.82	-2.95227	17.9375	0
P19945	60S acidic ribosomal protein P0 OS=Rattus norvegicus GN=Rplp0 PE=1 SV=2 - [RLA0_RAT]	622.726	14.83	1	4	4	14	1.0456	13	8.02698	1.14061	13	19.2142	1.11334	13	6.5243	0.948173	12	13.7616	1.08742	12	15.0479	1.17074	13	11.0157	0.99747	13	14.9396	317	34.1938	6.25244
	A2	Sequence	# PSMs	# Proteins	# Protein Groups	Protein Group Accessions	Modifications	ΔCn	(115+116)/(113+114)	(115+116)/(113+114) Count	(115+116)/(113+114) Variability [%]	(117+118)/(113+114)	(117+118)/(113+114) Count	(117+118)/(113+114) Variability [%]	(119+121)/(113+114)	(119+121)/(113+114) Count	(119+121)/(113+114) Variability [%]	114/113	114/113 Count	114/113 Variability [%]	115/116	115/116 Count	115/116 Variability [%]	117/118	117/118 Count	117/118 Variability [%]	119/121	119/121 Count	119/121 Variability [%]	IonScore	Exp Value	Charge	MH+ [Da]	ΔM [ppm]	RT [min]	# Missed Cleavages
	High	gTIEILSDVQLIk	4	1	1	P19945	N-Term(iTRAQ8plex); K13(iTRAQ8plex)	0	1.10622	4	3.5859	1.08887	4	3.84379	1.18323	4	10.0908	1.00816	4	9.11398	1.03459	4	3.39587	1.15849	4	0.823869	0.943169	4	30.6355	98.04	6.59552e-10	2	2037.26	7.37663	13.3503	0
	High	vLALSVETDYTFPLAEk	2	1	1	P19945	N-Term(iTRAQ8plex); K17(iTRAQ8plex)	0	0.755918	1		2.1314	1		1.76927	1								0.876544	1		0.85354	1		72.93	4.66038e-07	3	2504.39	-8.38751	6.81178	0
	High	iIQLLDDYPk	6	1	1	P19945	N-Term(iTRAQ8plex); K10(iTRAQ8plex)	0	1.02984	6	6.28022	1.2651	6	7.45639	1.07755	6	6.32228	0.8645	6	10.3484	1.2029	6	8.38647	1.21175	6	8.69646	1.06186	6	7.96867	63.73	2.28767e-06	2	1826.07	-9.1335	13.5252	0
	High	eDLTEIR	2	1	1	P19945	N-Term(iTRAQ8plex)	0	0.979208	2	1.71246	1.00932	2	0.910085	1.10819	2	1.07993	1.03416	2	5.62813	0.881377	2	0.171184	1.38825	2	8.10866	0.940016	2	8.81259	28.49	0.00530923	2	1179.64	-8.81454	13.799	0
P02401	60S acidic ribosomal protein P2 OS=Rattus norvegicus GN=Rplp2 PE=1 SV=2 - [RLA2_RAT]	393.363	28.7	1	3	3	13	1.05344	11	4.30935	1.65509	11	8.79165	1.19501	11	12.1252	0.846725	10	7.81376	1.11522	10	13.7489	1.09009	11	12.3684	0.966168	10	5.14025	115	11.6849	4.53857
	A2	Sequence	# PSMs	# Proteins	# Protein Groups	Protein Group Accessions	Modifications	ΔCn	(115+116)/(113+114)	(115+116)/(113+114) Count	(115+116)/(113+114) Variability [%]	(117+118)/(113+114)	(117+118)/(113+114) Count	(117+118)/(113+114) Variability [%]	(119+121)/(113+114)	(119+121)/(113+114) Count	(119+121)/(113+114) Variability [%]	114/113	114/113 Count	114/113 Variability [%]	115/116	115/116 Count	115/116 Variability [%]	117/118	117/118 Count	117/118 Variability [%]	119/121	119/121 Count	119/121 Variability [%]	IonScore	Exp Value	Charge	MH+ [Da]	ΔM [ppm]	RT [min]	# Missed Cleavages
	High	nIEDVIAQGVGk	7	1	1	P02401	N-Term(iTRAQ8plex); K12(iTRAQ8plex)	0	1.05344	5	4.06838	1.756	5	1.88803	1.24334	5	7.51138	0.854132	4	6.81476	1.19268	4	17.8321	1.17195	5	8.87212	0.978214	4	1.28931	71.74	4.32076e-07	2	1851.07	-3.42586	9.22456	0
	High	iLDSVGIEADDER	3	1	1	P02401	N-Term(iTRAQ8plex)	0	1.25493	3	5.7306	1.44165	3	12.3532	1.3957	3	23.3249	0.905759	3	2.71964	1.11123	3	21.1075	0.926784	3	16.123	0.962976	3	5.40267	45.7	8.34376e-05	2	1735.9	-3.49439	12.1639	0
	High	vISELnGk	3	1	1	P02401	N-Term(iTRAQ8plex); N6(Deamidated); K8(iTRAQ8plex)	0	1.02327	3	0.338131	1.6034	3	4.70716	1.10149	3	2.83546	0.84288	3	0.80986	1.0832	3	6.513	1.00315	3	9.24386	0.925106	3	0.558305	32.91	0.00445163	2	1468.88	-1.10286	13.5617	0
P62907	60S ribosomal protein L10a OS=Rattus norvegicus GN=Rpl10a PE=1 SV=2 - [RL10A_RAT]	172.313	22.58	1	4	4	7	1.11694	7	9.34392	1.10353	7	47.651	1.11806	7	14.8915	0.992146	6	5.38099	1.01851	6	16.9141	1.21275	7	5.58012	0.936225	7	15.2749	217	24.8155	9.93506
	A2	Sequence	# PSMs	# Proteins	# Protein Groups	Protein Group Accessions	Modifications	ΔCn	(115+116)/(113+114)	(115+116)/(113+114) Count	(115+116)/(113+114) Variability [%]	(117+118)/(113+114)	(117+118)/(113+114) Count	(117+118)/(113+114) Variability [%]	(119+121)/(113+114)	(119+121)/(113+114) Count	(119+121)/(113+114) Variability [%]	114/113	114/113 Count	114/113 Variability [%]	115/116	115/116 Count	115/116 Variability [%]	117/118	117/118 Count	117/118 Variability [%]	119/121	119/121 Count	119/121 Variability [%]	IonScore	Exp Value	Charge	MH+ [Da]	ΔM [ppm]	RT [min]	# Missed Cleavages
	High	fSVcVLGDQQHcDEAk	1	1	1	P62907	N-Term(iTRAQ8plex); C4(Carbamidomethyl); C12(Carbamidomethyl); K16(iTRAQ8plex)	0	1.10635	1		1.10353	1		0.88426	1		0.763474	1		1.10725	1		1.18563	1		0.936225	1		59.79	4.40808e-06	2	2501.23	-1.36932	9.35356	0
	High	fLETVELQISLk	2	1	1	P62907	N-Term(iTRAQ8plex); K12(iTRAQ8plex)	0	1.32296	2	86.1424	2.15725	2	7.44225	1.41713	2	20.5459	0.789429	1		1.43278	1		1.22679	2	7.29168	0.702366	2	24.9686	46.22	0.000143269	3	2028.2	-8.97487	8.64178	0
	High	aVDIPHMDIEALk	1	1	1	P62907	N-Term(iTRAQ8plex); K13(iTRAQ8plex)	0	1.39254	1		1.77041	1		1.17373	1		1.01576	1		1.05654	1		1.79181	1		0.826835	1		37.74	0.00139662	3	2060.16	-5.62608	11.1964	0
	High	dTLYEAVR	3	1	1	P62907	N-Term(iTRAQ8plex)	0	1.11694	3	3.5484	0.906269	3	8.66557	1.04421	3	8.62178	0.993303	3	0.345423	0.882774	3	14.4582	1.21275	3	3.79767	1.03057	3	0.951789	32.74	0.00236788	2	1270.71	8.28072	13.4023	0
P23358	60S ribosomal protein L12 OS=Rattus norvegicus GN=Rpl12 PE=2 SV=1 - [RL12_RAT]	425.541	25.45	1	3	3	11	1.09475	10	6.25124	0.971111	10	18.8153	1.06403	10	4.97042	1.05929	9	15.7038	1.05112	9	8.30149	1.19816	10	14.7511	0.91435	10	5.70544	165	17.8346	9.42236
	A2	Sequence	# PSMs	# Proteins	# Protein Groups	Protein Group Accessions	Modifications	ΔCn	(115+116)/(113+114)	(115+116)/(113+114) Count	(115+116)/(113+114) Variability [%]	(117+118)/(113+114)	(117+118)/(113+114) Count	(117+118)/(113+114) Variability [%]	(119+121)/(113+114)	(119+121)/(113+114) Count	(119+121)/(113+114) Variability [%]	114/113	114/113 Count	114/113 Variability [%]	115/116	115/116 Count	115/116 Variability [%]	117/118	117/118 Count	117/118 Variability [%]	119/121	119/121 Count	119/121 Variability [%]	IonScore	Exp Value	Charge	MH+ [Da]	ΔM [ppm]	RT [min]	# Missed Cleavages
	High	eILGTAQSVGcNVDGR	6	1	1	P23358	N-Term(iTRAQ8plex); C11(Carbamidomethyl)	0	1.11058	6	5.59587	0.971111	6	1.88495	1.04558	6	3.59367	1.02246	6	9.11002	1.03568	6	4.67922	1.1371	6	6.9263	0.901257	6	3.19134	75.44	1.20019e-07	2	1980.01	-0.123641	18.2512	0
	High	hPHDIIDDINSGAVEcPAS	4	1	1	P23358	N-Term(iTRAQ8plex); C16(Carbamidomethyl)	0	1.0902	3	8.36388	0.841422	3	5.1937	1.24637	3	25.7386	1.25302	2	9.31391	1.04201	2	26.5698	1.25782	3	44.4115	0.922729	3	34.5952	66.72	4.46909e-07	2	2351.12	-1.31771	17.9418	0
	High	vGDDIAk	1	1	1	P23358	N-Term(iTRAQ8plex); K7(iTRAQ8plex)	0	1.09933	1		1.21331	1		1.10552	1		0.946428	1		1.16165	1		1.50831	1		0.959119	1		33.16	0.00285005	2	1325.78	-9.95278	16.9632	0
P41123	60S ribosomal protein L13 OS=Rattus norvegicus GN=Rpl13 PE=1 SV=2 - [RL13_RAT]	118.249	8.06	1	2	2	5	1.00901	5	6.33594	0.970997	5	28.8585	1.06476	5	2.43709	0.904792	5	21.1914	0.999322	5	3.75418	1.10158	5	13.7587	0.945539	5	3.09053	211	24.2944	11.5464
	A2	Sequence	# PSMs	# Proteins	# Protein Groups	Protein Group Accessions	Modifications	ΔCn	(115+116)/(113+114)	(115+116)/(113+114) Count	(115+116)/(113+114) Variability [%]	(117+118)/(113+114)	(117+118)/(113+114) Count	(117+118)/(113+114) Variability [%]	(119+121)/(113+114)	(119+121)/(113+114) Count	(119+121)/(113+114) Variability [%]	114/113	114/113 Count	114/113 Variability [%]	115/116	115/116 Count	115/116 Variability [%]	117/118	117/118 Count	117/118 Variability [%]	119/121	119/121 Count	119/121 Variability [%]	IonScore	Exp Value	Charge	MH+ [Da]	ΔM [ppm]	RT [min]	# Missed Cleavages
	High	gFSLEELR	3	1	1	P41123	N-Term(iTRAQ8plex)	0	1.10091	3	8.78119	0.8794	3	13.6563	1.05572	3	1.26347	0.931225	3	4.27123	0.986619	3	1.89687	1.01373	3	1.37146	0.957547	3	1.21888	45.87	5.43525e-05	2	1254.7	-1.90496	8.50844	0
	High	eAAEQDVEk	2	1	1	P41123	N-Term(iTRAQ8plex); K9(iTRAQ8plex)	0	0.979084	2	1.86671	1.3421	2	4.41036	1.14158	2	7.90428	0.75605	2	3.9301	1.06433	2	5.5959	1.34124	2	4.8785	0.908188	2	0.15933	38.05	0.000736373	2	1626.87	-5.226	13.1365	0
P35427	60S ribosomal protein L13a OS=Rattus norvegicus GN=Rpl13a PE=1 SV=2 - [RL13A_RAT]	108.245	14.29	1	3	3	5	1.2728	5	13.7662	1.21846	5	32.9797	1.31986	5	19.2	0.874328	5	12.7851	1.10242	5	3.46451	1.28901	5	1.23202	0.926669	5	4.87329	203	23.4614	11.019
	A2	Sequence	# PSMs	# Proteins	# Protein Groups	Protein Group Accessions	Modifications	ΔCn	(115+116)/(113+114)	(115+116)/(113+114) Count	(115+116)/(113+114) Variability [%]	(117+118)/(113+114)	(117+118)/(113+114) Count	(117+118)/(113+114) Variability [%]	(119+121)/(113+114)	(119+121)/(113+114) Count	(119+121)/(113+114) Variability [%]	114/113	114/113 Count	114/113 Variability [%]	115/116	115/116 Count	115/116 Variability [%]	117/118	117/118 Count	117/118 Variability [%]	119/121	119/121 Count	119/121 Variability [%]	IonScore	Exp Value	Charge	MH+ [Da]	ΔM [ppm]	RT [min]	# Missed Cleavages
	High	vLDGIPPPYDk	1	1	1	P35427	N-Term(iTRAQ8plex); K11(iTRAQ8plex)	0	0.964564	1		0.981039	1		0.993081	1		0.952739	1		1.10242	1		1.29977	1		0.957616	1		44.21	0.000214313	2	1822.06	2.12363	15.9239	0
	High	aEGQVLVLDGR	2	1	1	P35427	N-Term(iTRAQ8plex)	0	1.4506	2	5.68894	1.62256	2	1.40956	1.51659	2	1.57304	0.892958	2	3.12664	1.06011	2	8.75099	1.27285	2	1.87126	0.894119	2	9.0784	40.15	0.000613442	2	1460.83	-2.20092	13.7973	0
	High	lAAIVAk	2	1	1	P35427	N-Term(iTRAQ8plex); K7(iTRAQ8plex)	0	1.26174	2	1.29453	1.21253	2	0.723601	1.26498	2	6.30227	0.6572	2	11.2483	1.2236	2	19.0968	1.16715	2	15.7759	0.848961	2	13.04	31.65	0.000682292	2	1293.86	-5.23987	3.98596	0
Q63507	60S ribosomal protein L14 OS=Rattus norvegicus GN=Rpl14 PE=1 SV=3 - [RL14_RAT]	192.4	5.61	1	1	1	5	1.11972	4	2.59526	1.04063	4	3.35536	1.10565	4	0.240008	0.791976	4	2.65702	1.15353	4	1.85415	1.13419	4	3.43671	0.856914	4	1.47065	214	23.3241	11.1069
	A2	Sequence	# PSMs	# Proteins	# Protein Groups	Protein Group Accessions	Modifications	ΔCn	(115+116)/(113+114)	(115+116)/(113+114) Count	(115+116)/(113+114) Variability [%]	(117+118)/(113+114)	(117+118)/(113+114) Count	(117+118)/(113+114) Variability [%]	(119+121)/(113+114)	(119+121)/(113+114) Count	(119+121)/(113+114) Variability [%]	114/113	114/113 Count	114/113 Variability [%]	115/116	115/116 Count	115/116 Variability [%]	117/118	117/118 Count	117/118 Variability [%]	119/121	119/121 Count	119/121 Variability [%]	IonScore	Exp Value	Charge	MH+ [Da]	ΔM [ppm]	RT [min]	# Missed Cleavages
	High	lVAIVDVIDQNR	5	1	1	Q63507	N-Term(iTRAQ8plex)	0	1.11972	4	2.59526	1.04063	4	3.35536	1.10565	4	0.240008	0.791976	4	2.65702	1.15353	4	1.85415	1.13419	4	3.43671	0.856914	4	1.47065	72.01	3.0531e-07	3	1658.98	1.66587	6.57526	0
P61314	60S ribosomal protein L15 OS=Rattus norvegicus GN=Rpl15 PE=1 SV=2 - [RL15_RAT]	77.0543	10.29	1	2	2	3	1.13258	3	7.4068	0.910914	3	8.54827	1.15833	3	2.48989	0.946998	3	16.705	1.00202	3	2.2122	1.16124	3	6.82	0.926475	3	6.74886	204	24.1311	11.6196
	A2	Sequence	# PSMs	# Proteins	# Protein Groups	Protein Group Accessions	Modifications	ΔCn	(115+116)/(113+114)	(115+116)/(113+114) Count	(115+116)/(113+114) Variability [%]	(117+118)/(113+114)	(117+118)/(113+114) Count	(117+118)/(113+114) Variability [%]	(119+121)/(113+114)	(119+121)/(113+114) Count	(119+121)/(113+114) Variability [%]	114/113	114/113 Count	114/113 Variability [%]	115/116	115/116 Count	115/116 Variability [%]	117/118	117/118 Count	117/118 Variability [%]	119/121	119/121 Count	119/121 Variability [%]	IonScore	Exp Value	Charge	MH+ [Da]	ΔM [ppm]	RT [min]	# Missed Cleavages
	High	fFEVILIDPFHk	1	1	1	P61314	N-Term(iTRAQ8plex); K12(iTRAQ8plex)	0	1.22495	1		1.64264	1		1.40147	1		0.656364	1		1.53704	1		0.887941	1		1.43647	1		44.08	0.000263818	3	2113.23	0.507424	5.53536	0
	High	sLQSVAEER	2	1	1	P61314	N-Term(iTRAQ8plex)	0	1.10468	2	3.6996	0.885075	2	4.2683	1.14865	2	1.2448	1.00149	2	8.30938	0.994569	2	1.106	1.18823	2	3.40703	0.90565	2	3.37155	37.73	0.000910739	2	1322.71	-7.69317	11.8482	0
P24049	60S ribosomal protein L17 OS=Rattus norvegicus GN=Rpl17 PE=2 SV=3 - [RL17_RAT]	90.7741	14.13	1	2	2	5	1.16794	4	3.75421	1.07394	4	4.64442	1.12365	4	5.07146	0.824718	4	12.6782	1.0062	4	10.2392	1.23037	4	3.29399	0.83493	4	13.8553	184	21.3834	10.1841
	A2	Sequence	# PSMs	# Proteins	# Protein Groups	Protein Group Accessions	Modifications	ΔCn	(115+116)/(113+114)	(115+116)/(113+114) Count	(115+116)/(113+114) Variability [%]	(117+118)/(113+114)	(117+118)/(113+114) Count	(117+118)/(113+114) Variability [%]	(119+121)/(113+114)	(119+121)/(113+114) Count	(119+121)/(113+114) Variability [%]	114/113	114/113 Count	114/113 Variability [%]	115/116	115/116 Count	115/116 Variability [%]	117/118	117/118 Count	117/118 Variability [%]	119/121	119/121 Count	119/121 Variability [%]	IonScore	Exp Value	Charge	MH+ [Da]	ΔM [ppm]	RT [min]	# Missed Cleavages
	High	gLDVDSLVIEHIQVNk	2	1	1	P24049	N-Term(iTRAQ8plex); K16(iTRAQ8plex)	0	1.39334	1		1.81813	1		1.45671	1		0.375298	1		0.91833	1		1.24906	1		0.748555	1		42.87	0.000431208	3	2387.38	1.95604	12.8844	0
	High	ySLDPENPTk	3	1	1	P24049	N-Term(iTRAQ8plex); K10(iTRAQ8plex)	0	1.16259	3	1.36148	1.0688	3	1.42401	1.12049	3	0.834793	0.889125	3	2.9587	1.05397	3	7.10233	1.21196	3	2.11587	0.901592	3	5.21779	32.94	0.00256621	2	1771.95	-9.97543	10.1772	0
P12001	60S ribosomal protein L18 OS=Rattus norvegicus GN=Rpl18 PE=2 SV=2 - [RL18_RAT]	287.828	13.83	1	2	2	9	1.11179	9	8.24508	1.15988	9	41.6419	1.01299	9	28.4846	0.838012	9	13.0754	1.06121	9	14.5128	1.0386	9	8.85058	0.980824	9	10.6685	188	21.6452	11.7808
	A2	Sequence	# PSMs	# Proteins	# Protein Groups	Protein Group Accessions	Modifications	ΔCn	(115+116)/(113+114)	(115+116)/(113+114) Count	(115+116)/(113+114) Variability [%]	(117+118)/(113+114)	(117+118)/(113+114) Count	(117+118)/(113+114) Variability [%]	(119+121)/(113+114)	(119+121)/(113+114) Count	(119+121)/(113+114) Variability [%]	114/113	114/113 Count	114/113 Variability [%]	115/116	115/116 Count	115/116 Variability [%]	117/118	117/118 Count	117/118 Variability [%]	119/121	119/121 Count	119/121 Variability [%]	IonScore	Exp Value	Charge	MH+ [Da]	ΔM [ppm]	RT [min]	# Missed Cleavages
	High	iLTFDQLALESPk	4	1	1	P12001	N-Term(iTRAQ8plex); K13(iTRAQ8plex)	0	1.23111	4	17.1394	1.36171	4	11.3562	1.3981	4	18.4351	0.787599	4	15.2935	1.17495	4	12.704	1.08072	4	29.0582	0.889718	4	14.3321	74.73	1.90129e-07	2	2083.24	7.343	13.0962	0
	High	tAVVVGTITDDVR	5	1	1	P12001	N-Term(iTRAQ8plex)	0	1.11179	5	8.24508	0.838202	5	8.18182	0.930531	5	7.87897	0.844476	5	9.82017	0.985962	5	4.71275	1.0386	5	7.29556	1.05085	5	11.8189	52.02	3.07749e-05	2	1649.94	0.855269	10.3813	0
P62718	60S ribosomal protein L18a OS=Rattus norvegicus GN=Rpl18a PE=2 SV=1 - [RL18A_RAT]	85.8889	11.93	1	2	2	4	1.1668	4	4.31568	1.30517	4	1.1161	1.2702	4	3.9155	0.777506	4	9.36951	1.01748	4	3.62953	1.18097	4	0.457706	0.87111	4	0.538808	176	20.7189	10.7114
	A2	Sequence	# PSMs	# Proteins	# Protein Groups	Protein Group Accessions	Modifications	ΔCn	(115+116)/(113+114)	(115+116)/(113+114) Count	(115+116)/(113+114) Variability [%]	(117+118)/(113+114)	(117+118)/(113+114) Count	(117+118)/(113+114) Variability [%]	(119+121)/(113+114)	(119+121)/(113+114) Count	(119+121)/(113+114) Variability [%]	114/113	114/113 Count	114/113 Variability [%]	115/116	115/116 Count	115/116 Variability [%]	117/118	117/118 Count	117/118 Variability [%]	119/121	119/121 Count	119/121 Variability [%]	IonScore	Exp Value	Charge	MH+ [Da]	ΔM [ppm]	RT [min]	# Missed Cleavages
	High	vEEIAAGk	3	1	1	P62718	N-Term(iTRAQ8plex); K8(iTRAQ8plex)	0	1.19122	3	2.48734	1.3096	3	1.00355	1.28679	3	3.84936	0.757669	3	7.67469	1.04068	3	3.05679	1.18316	3	0.550886	0.869458	3	0.514718	47.98	0.000124988	2	1424.86	5.34665	10.6863	0
	High	dLTTAGAVTQcYR	1	1	1	P62718	N-Term(iTRAQ8plex); C11(Carbamidomethyl)	0	1.14289	1		1.0904	1		1.22061	1		0.920652	1		0.994793	1		1.17588	1		0.922506	1		33.47	0.000967027	2	1759.88	-6.31097	8.87948	0
P84100	60S ribosomal protein L19 OS=Rattus norvegicus GN=Rpl19 PE=1 SV=1 - [RL19_RAT]	227.66	17.35	1	3	3	10	1.20634	10	5.0316	1.21682	10	17.2088	1.15564	10	9.10717	0.966694	10	8.53237	1.1026	10	9.85759	1.17157	10	7.09725	0.985969	10	5.4045	196	23.4512	11.4731
	A2	Sequence	# PSMs	# Proteins	# Protein Groups	Protein Group Accessions	Modifications	ΔCn	(115+116)/(113+114)	(115+116)/(113+114) Count	(115+116)/(113+114) Variability [%]	(117+118)/(113+114)	(117+118)/(113+114) Count	(117+118)/(113+114) Variability [%]	(119+121)/(113+114)	(119+121)/(113+114) Count	(119+121)/(113+114) Variability [%]	114/113	114/113 Count	114/113 Variability [%]	115/116	115/116 Count	115/116 Variability [%]	117/118	117/118 Count	117/118 Variability [%]	119/121	119/121 Count	119/121 Variability [%]	IonScore	Exp Value	Charge	MH+ [Da]	ΔM [ppm]	RT [min]	# Missed Cleavages
	High	vWLDPNETNEIANANSR	1	1	1	P84100	N-Term(iTRAQ8plex)	0	1.25686	1		1.11497	1		1.17858	1		0.996879	1		0.917709	1		0.972981	1		0.779093	1		64.17	1.60786e-06	2	2247.13	-0.491751	19.4142	0
	High	iLMEHIHk	7	1	1	P84100	N-Term(iTRAQ8plex); K8(iTRAQ8plex)	0	1.2101	7	4.75202	1.35896	7	6.48275	1.21683	7	16.2917	0.977355	7	8.75688	1.13497	7	3.01599	1.22454	7	7.48755	1.01493	7	5.32409	39.72	0.000442637	2	1628.98	-0.855737	10.8485	0
	High	lLADQAEAR	2	1	1	P84100	N-Term(iTRAQ8plex)	0	1.11083	2	7.74677	1.03453	2	6.17891	1.13019	2	0.387429	0.88089	2	12.1996	0.992237	2	2.30017	1.11743	2	0.949426	0.929479	2	9.79908	33.46	0.00245695	2	1290.74	6.92705	12.7453	0
P62832	60S ribosomal protein L23 OS=Rattus norvegicus GN=Rpl23 PE=2 SV=1 - [RL23_RAT]	35.22	14.29	1	1	1	1	1.22776	1		1.42466	1		1.06408	1		0.992278	1		1.17745	1		0.944376	1		1.14071	1		140	14.8561	10.5063
	A2	Sequence	# PSMs	# Proteins	# Protein Groups	Protein Group Accessions	Modifications	ΔCn	(115+116)/(113+114)	(115+116)/(113+114) Count	(115+116)/(113+114) Variability [%]	(117+118)/(113+114)	(117+118)/(113+114) Count	(117+118)/(113+114) Variability [%]	(119+121)/(113+114)	(119+121)/(113+114) Count	(119+121)/(113+114) Variability [%]	114/113	114/113 Count	114/113 Variability [%]	115/116	115/116 Count	115/116 Variability [%]	117/118	117/118 Count	117/118 Variability [%]	119/121	119/121 Count	119/121 Variability [%]	IonScore	Exp Value	Charge	MH+ [Da]	ΔM [ppm]	RT [min]	# Missed Cleavages
	High	iSLGLPVGAVINcADNTGAk	1	1	1	P62832	N-Term(iTRAQ8plex); C13(Carbamidomethyl); K20(iTRAQ8plex)	0	1.22776	1		1.42466	1		1.06408	1		0.992278	1		1.17745	1		0.944376	1		1.14071	1		35.22	0.00300608	3	2578.46	5.88328	6.34305	0
P62752	60S ribosomal protein L23a OS=Rattus norvegicus GN=Rpl23a PE=2 SV=1 - [RL23A_RAT]	152.644	8.33	1	1	1	6	1.01351	3	10.5347	1.11319	3	3.81841	1.13711	3	0.681574	1.08535	3	7.35646	0.936143	2	7.40319	1.09079	3	6.90437	0.866618	3	1.5651	156	17.6841	10.4478
	A2	Sequence	# PSMs	# Proteins	# Protein Groups	Protein Group Accessions	Modifications	ΔCn	(115+116)/(113+114)	(115+116)/(113+114) Count	(115+116)/(113+114) Variability [%]	(117+118)/(113+114)	(117+118)/(113+114) Count	(117+118)/(113+114) Variability [%]	(119+121)/(113+114)	(119+121)/(113+114) Count	(119+121)/(113+114) Variability [%]	114/113	114/113 Count	114/113 Variability [%]	115/116	115/116 Count	115/116 Variability [%]	117/118	117/118 Count	117/118 Variability [%]	119/121	119/121 Count	119/121 Variability [%]	IonScore	Exp Value	Charge	MH+ [Da]	ΔM [ppm]	RT [min]	# Missed Cleavages
	High	lAPDYDALDVANk	6	1	1	P62752	N-Term(iTRAQ8plex); K13(iTRAQ8plex)	0	1.01351	3	10.5347	1.11319	3	3.81841	1.13711	3	0.681574	1.08535	3	7.35646	0.936143	2	7.40319	1.09079	3	6.90437	0.866618	3	1.5651	56.51	1.82036e-05	2	2013.1	-4.58145	20.8258	0
P12749	60S ribosomal protein L26 OS=Rattus norvegicus GN=Rpl26 PE=1 SV=1 - [RL26_RAT]	78.0332	5.52	1	1	1	3	1.16901	3	3.39393	1.19528	3	0.745132	1.14596	3	1.76638	0.904801	3	4.02185	0.98257	3	21.7093	1.19517	3	0.823857	0.959886	3	13.6735	145	17.2666	10.6235
	A2	Sequence	# PSMs	# Proteins	# Protein Groups	Protein Group Accessions	Modifications	ΔCn	(115+116)/(113+114)	(115+116)/(113+114) Count	(115+116)/(113+114) Variability [%]	(117+118)/(113+114)	(117+118)/(113+114) Count	(117+118)/(113+114) Variability [%]	(119+121)/(113+114)	(119+121)/(113+114) Count	(119+121)/(113+114) Variability [%]	114/113	114/113 Count	114/113 Variability [%]	115/116	115/116 Count	115/116 Variability [%]	117/118	117/118 Count	117/118 Variability [%]	119/121	119/121 Count	119/121 Variability [%]	IonScore	Exp Value	Charge	MH+ [Da]	ΔM [ppm]	RT [min]	# Missed Cleavages
	High	dDEVQVVR	3	1	1	P12749	N-Term(iTRAQ8plex)	0	1.16901	3	3.39393	1.19528	3	0.745132	1.14596	3	1.76638	0.904801	3	4.02185	0.98257	3	21.7093	1.19517	3	0.823857	0.959886	3	13.6735	41.31	0.000266258	2	1263.67	-7.85889	15.423	0
P61354	60S ribosomal protein L27 OS=Rattus norvegicus GN=Rpl27 PE=2 SV=2 - [RL27_RAT]	148.351	12.5	1	2	2	7	1.07268	7	5.71693	0.980094	7	5.77119	0.968524	7	5.80649	0.89367	7	17.0675	1.05323	7	7.28202	1.18225	7	7.54911	0.929345	7	9.34726	136	15.7877	10.5649
	A2	Sequence	# PSMs	# Proteins	# Protein Groups	Protein Group Accessions	Modifications	ΔCn	(115+116)/(113+114)	(115+116)/(113+114) Count	(115+116)/(113+114) Variability [%]	(117+118)/(113+114)	(117+118)/(113+114) Count	(117+118)/(113+114) Variability [%]	(119+121)/(113+114)	(119+121)/(113+114) Count	(119+121)/(113+114) Variability [%]	114/113	114/113 Count	114/113 Variability [%]	115/116	115/116 Count	115/116 Variability [%]	117/118	117/118 Count	117/118 Variability [%]	119/121	119/121 Count	119/121 Variability [%]	IonScore	Exp Value	Charge	MH+ [Da]	ΔM [ppm]	RT [min]	# Missed Cleavages
	High	ySVDIPLDk	6	1	1	P61354	N-Term(iTRAQ8plex); K9(iTRAQ8plex)	0	1.05569	6	6.64568	0.981725	6	4.64139	0.96641	6	5.54024	0.905105	6	10.8046	1.04021	6	5.22391	1.19325	6	10.4926	0.929874	6	9.66959	47.91	9.78938e-05	2	1657.96	-0.0902546	12.6597	0
	High	vVLVLAGR	1	1	1	P61354	N-Term(iTRAQ8plex)	0	1.08561	1		0.936163	1		1.05658	1		0.756397	1		1.21429	1		1.13265	1		0.9153	1		21.96	0.00635287	2	1130.76	0.506065	9.22257	0
P18445	60S ribosomal protein L27a OS=Rattus norvegicus GN=Rpl27a PE=1 SV=3 - [RL27A_RAT]	72.4765	7.43	1	1	1	3	1.16075	3	2.05479	1.06154	3	9.83835	1.15463	3	1.99612	0.895519	3	0.361602	1.0721	3	13.7591	1.36663	3	1.51412	0.850957	3	16.304	148	16.608	11.1216
	A2	Sequence	# PSMs	# Proteins	# Protein Groups	Protein Group Accessions	Modifications	ΔCn	(115+116)/(113+114)	(115+116)/(113+114) Count	(115+116)/(113+114) Variability [%]	(117+118)/(113+114)	(117+118)/(113+114) Count	(117+118)/(113+114) Variability [%]	(119+121)/(113+114)	(119+121)/(113+114) Count	(119+121)/(113+114) Variability [%]	114/113	114/113 Count	114/113 Variability [%]	115/116	115/116 Count	115/116 Variability [%]	117/118	117/118 Count	117/118 Variability [%]	119/121	119/121 Count	119/121 Variability [%]	IonScore	Exp Value	Charge	MH+ [Da]	ΔM [ppm]	RT [min]	# Missed Cleavages
	High	nGVAPIIDVVR	3	1	1	P18445	N-Term(iTRAQ8plex); N1(Deamidated)	0	1.16075	3	2.05479	1.06154	3	9.83835	1.15463	3	1.99612	0.895519	3	0.361602	1.0721	3	13.7591	1.36663	3	1.51412	0.850957	3	16.304	38.41	0.000836427	2	1457.86	-1.51724	11.0452	0
P25886	60S ribosomal protein L29 OS=Rattus norvegicus GN=Rpl29 PE=1 SV=3 - [RL29_RAT]	26.75	5.13	1	1	1	1	1.14705	1		1.15982	1		1.15844	1		0.914049	1		1.19738	1		1.06401	1		1.03548	1		156	17.3148	11.7808
	A2	Sequence	# PSMs	# Proteins	# Protein Groups	Protein Group Accessions	Modifications	ΔCn	(115+116)/(113+114)	(115+116)/(113+114) Count	(115+116)/(113+114) Variability [%]	(117+118)/(113+114)	(117+118)/(113+114) Count	(117+118)/(113+114) Variability [%]	(119+121)/(113+114)	(119+121)/(113+114) Count	(119+121)/(113+114) Variability [%]	114/113	114/113 Count	114/113 Variability [%]	115/116	115/116 Count	115/116 Variability [%]	117/118	117/118 Count	117/118 Variability [%]	119/121	119/121 Count	119/121 Variability [%]	IonScore	Exp Value	Charge	MH+ [Da]	ΔM [ppm]	RT [min]	# Missed Cleavages
	High	lAFIAHPk	1	1	1	P25886	N-Term(iTRAQ8plex); K8(iTRAQ8plex)	0	1.14705	1		1.15982	1		1.15844	1		0.914049	1		1.19738	1		1.06401	1		1.03548	1		26.75	0.00718586	2	1504.94	-4.16391	5.01605	0
P21531	60S ribosomal protein L3 OS=Rattus norvegicus GN=Rpl3 PE=1 SV=3 - [RL3_RAT]	62.16	2.98	1	1	1	1	1.11554	1		1.16737	1		1.19261	1		0.67148	1		1.11781	1		1.22543	1		0.895253	1		403	46.1068	10.2134
	A2	Sequence	# PSMs	# Proteins	# Protein Groups	Protein Group Accessions	Modifications	ΔCn	(115+116)/(113+114)	(115+116)/(113+114) Count	(115+116)/(113+114) Variability [%]	(117+118)/(113+114)	(117+118)/(113+114) Count	(117+118)/(113+114) Variability [%]	(119+121)/(113+114)	(119+121)/(113+114) Count	(119+121)/(113+114) Variability [%]	114/113	114/113 Count	114/113 Variability [%]	115/116	115/116 Count	115/116 Variability [%]	117/118	117/118 Count	117/118 Variability [%]	119/121	119/121 Count	119/121 Variability [%]	IonScore	Exp Value	Charge	MH+ [Da]	ΔM [ppm]	RT [min]	# Missed Cleavages
	High	nNASTDYDLSDk	1	1	1	P21531	N-Term(iTRAQ8plex); K12(iTRAQ8plex)	0	1.11554	1		1.16737	1		1.19261	1		0.67148	1		1.11781	1		1.22543	1		0.895253	1		62.16	2.2501e-06	2	1950.97	-8.75634	15.9825	0
P62890	60S ribosomal protein L30 OS=Rattus norvegicus GN=Rpl30 PE=2 SV=2 - [RL30_RAT]	329.369	28.7	1	3	3	9	1.17198	9	4.95902	0.986925	9	13.459	1.14964	9	7.27696	0.93663	9	9.42668	1.06013	9	7.82985	1.08369	9	16.5585	0.947545	9	11.4299	115	12.7757	9.62744
	A2	Sequence	# PSMs	# Proteins	# Protein Groups	Protein Group Accessions	Modifications	ΔCn	(115+116)/(113+114)	(115+116)/(113+114) Count	(115+116)/(113+114) Variability [%]	(117+118)/(113+114)	(117+118)/(113+114) Count	(117+118)/(113+114) Variability [%]	(119+121)/(113+114)	(119+121)/(113+114) Count	(119+121)/(113+114) Variability [%]	114/113	114/113 Count	114/113 Variability [%]	115/116	115/116 Count	115/116 Variability [%]	117/118	117/118 Count	117/118 Variability [%]	119/121	119/121 Count	119/121 Variability [%]	IonScore	Exp Value	Charge	MH+ [Da]	ΔM [ppm]	RT [min]	# Missed Cleavages
	High	vcTLAIIDPGDSDIIR	6	1	1	P62890	N-Term(iTRAQ8plex); C2(Carbamidomethyl)	0	1.19674	6	5.04431	0.945918	6	4.16945	1.19428	6	4.94624	0.931041	6	3.44133	0.979083	6	12.6023	1.00527	6	11.2321	1.07289	6	9.96434	79.33	8.45937e-08	2	2062.13	7.27283	10.6085	0
	High	sLESInSR	1	1	1	P62890	N-Term(iTRAQ8plex); N6(Deamidated)	0	1.08977	1		1.20557	1		1.12827	1		0.879054	1		1.06013	1		1.16565	1		0.922685	1		32.12	0.00187197	2	1210.65	-7.93971	15.9283	0
	High	smPEQTGEk	1	1	1	P62890	N-Term(iTRAQ8plex); M2(Oxidation); K9(iTRAQ8plex)	0	1.17198	1		1.25122	1		1.08429	1		1.15003	1		1.07295	1		1.39659	1		0.893825	1		29.94	0.00314313	2	1630.85	-6.39993	9.97788	0
	High	sMPEQTGEk	1	1	1	P62890	N-Term(iTRAQ8plex); K9(iTRAQ8plex)	0	1.13345	1		1.29509	1		1.10401	1		1.03944	1		1.06655	1		1.2531	1		0.87746	1		26.37	0.00991901	2	1614.85	-5.15226	9.94149	0
P62902	60S ribosomal protein L31 OS=Rattus norvegicus GN=Rpl31 PE=2 SV=1 - [RL31_RAT]	103.578	21.6	1	3	3	5	1.11027	5	10.5908	1.13193	5	29.6106	1.12054	5	12.7938	0.954206	5	8.03484	1.02286	5	11.2202	1.23305	5	7.30557	0.995416	5	6.03248	125	14.4539	10.5356
	A2	Sequence	# PSMs	# Proteins	# Protein Groups	Protein Group Accessions	Modifications	ΔCn	(115+116)/(113+114)	(115+116)/(113+114) Count	(115+116)/(113+114) Variability [%]	(117+118)/(113+114)	(117+118)/(113+114) Count	(117+118)/(113+114) Variability [%]	(119+121)/(113+114)	(119+121)/(113+114) Count	(119+121)/(113+114) Variability [%]	114/113	114/113 Count	114/113 Variability [%]	115/116	115/116 Count	115/116 Variability [%]	117/118	117/118 Count	117/118 Variability [%]	119/121	119/121 Count	119/121 Variability [%]	IonScore	Exp Value	Charge	MH+ [Da]	ΔM [ppm]	RT [min]	# Missed Cleavages
	High	nLQTVNVDEN	1	1	1	P62902	N-Term(iTRAQ8plex)	0	2.25668	1		9.21337	1		2.23262	1		1.23021	1		0.699635	1		14.2142	1		0.687023	1		53.15	1.04097e-05	2	1449.74	-6.23538	19.0464	0
	High	sAInEVVTR	1	1	1	P62902	N-Term(iTRAQ8plex); N4(Deamidated)	0	1.08832	1		0.912107	1		1.02826	1		0.954206	1		1.10301	1		0.926538	1		0.995416	1		37.92	0.000565025	2	1293.72	-9.42967	14.1078	0
	High	eMGTPDVR	3	1	1	P62902	N-Term(iTRAQ8plex)	0	1.11027	3	10.5908	1.13193	3	6.47785	1.12054	3	6.25711	0.910284	3	1.03561	1.02286	3	7.20572	1.23305	3	1.41938	1.03142	3	3.04238	28.04	0.00321924	2	1208.62	-8.00376	13.3577	0
P62912	60S ribosomal protein L32 OS=Rattus norvegicus GN=Rpl32 PE=1 SV=2 - [RL32_RAT]	45.31	7.41	1	1	1	1	1.16507	1		1.24887	1		1.68826	1		0.713539	1		1.31672	1		1.25011	1		1.11147	1		135	15.8498	11.3267
	A2	Sequence	# PSMs	# Proteins	# Protein Groups	Protein Group Accessions	Modifications	ΔCn	(115+116)/(113+114)	(115+116)/(113+114) Count	(115+116)/(113+114) Variability [%]	(117+118)/(113+114)	(117+118)/(113+114) Count	(117+118)/(113+114) Variability [%]	(119+121)/(113+114)	(119+121)/(113+114) Count	(119+121)/(113+114) Variability [%]	114/113	114/113 Count	114/113 Variability [%]	115/116	115/116 Count	115/116 Variability [%]	117/118	117/118 Count	117/118 Variability [%]	119/121	119/121 Count	119/121 Variability [%]	IonScore	Exp Value	Charge	MH+ [Da]	ΔM [ppm]	RT [min]	# Missed Cleavages
	High	eLEVLLMcNk	1	1	1	P62912	N-Term(iTRAQ8plex); C8(Carbamidomethyl); K10(iTRAQ8plex)	0	1.16507	1		1.24887	1		1.68826	1		0.713539	1		1.31672	1		1.25011	1		1.11147	1		45.31	0.000214943	3	1857.06	8.93154	8.50194	0
P11250	60S ribosomal protein L34 OS=Rattus norvegicus GN=Rpl34 PE=1 SV=3 - [RL34_RAT]	68.0471	6.84	1	1	1	4	1.10215	4	3.66537	1.02539	4	6.66512	1.04261	4	2.64399	0.838534	4	9.34226	1.15626	4	15.9132	1.13468	4	3.07925	0.900982	4	11.9493	117	13.4987	11.6636
	A2	Sequence	# PSMs	# Proteins	# Protein Groups	Protein Group Accessions	Modifications	ΔCn	(115+116)/(113+114)	(115+116)/(113+114) Count	(115+116)/(113+114) Variability [%]	(117+118)/(113+114)	(117+118)/(113+114) Count	(117+118)/(113+114) Variability [%]	(119+121)/(113+114)	(119+121)/(113+114) Count	(119+121)/(113+114) Variability [%]	114/113	114/113 Count	114/113 Variability [%]	115/116	115/116 Count	115/116 Variability [%]	117/118	117/118 Count	117/118 Variability [%]	119/121	119/121 Count	119/121 Variability [%]	IonScore	Exp Value	Charge	MH+ [Da]	ΔM [ppm]	RT [min]	# Missed Cleavages
	High	aFLIEEQk	4	1	1	P11250	N-Term(iTRAQ8plex); K8(iTRAQ8plex)	0	1.10215	4	3.66537	1.02539	4	6.66512	1.04261	4	2.64399	0.838534	4	9.34226	1.15626	4	15.9132	1.13468	4	3.07925	0.900982	4	11.9493	37.14	0.00112054	2	1585.93	-4.24961	10.3077	0
P17078	60S ribosomal protein L35 OS=Rattus norvegicus GN=Rpl35 PE=1 SV=3 - [RL35_RAT]	36.54	10.57	1	1	1	1	1.11303	1		1.20795	1		1.12733	1		0.88469	1		1.12887	1		0.969037	1		0.938462	1		123	14.5436	11.0483
	A2	Sequence	# PSMs	# Proteins	# Protein Groups	Protein Group Accessions	Modifications	ΔCn	(115+116)/(113+114)	(115+116)/(113+114) Count	(115+116)/(113+114) Variability [%]	(117+118)/(113+114)	(117+118)/(113+114) Count	(117+118)/(113+114) Variability [%]	(119+121)/(113+114)	(119+121)/(113+114) Count	(119+121)/(113+114) Variability [%]	114/113	114/113 Count	114/113 Variability [%]	115/116	115/116 Count	115/116 Variability [%]	117/118	117/118 Count	117/118 Variability [%]	119/121	119/121 Count	119/121 Variability [%]	IonScore	Exp Value	Charge	MH+ [Da]	ΔM [ppm]	RT [min]	# Missed Cleavages
	High	qLDDLkVELSQLR	1	1	1	P17078	N-Term(iTRAQ8plex); K6(iTRAQ8plex)	0	1.11303	1		1.20795	1		1.12733	1		0.88469	1		1.12887	1		0.969037	1		0.938462	1		36.54	0.00140855	2	2165.29	5.70816	8.99733	1
P04646	60S ribosomal protein L35a OS=Rattus norvegicus GN=Rpl35a PE=3 SV=1 - [RL35A_RAT]	51.5301	8.18	1	1	1	2	1.10799	2	6.77928	1.21289	2	4.85029	1.10903	2	3.28606	0.97886	2	4.05894	0.890939	2	4.26116	1.45137	2	6.71363	0.882234	2	11.2826	110	12.5457	10.8872
	A2	Sequence	# PSMs	# Proteins	# Protein Groups	Protein Group Accessions	Modifications	ΔCn	(115+116)/(113+114)	(115+116)/(113+114) Count	(115+116)/(113+114) Variability [%]	(117+118)/(113+114)	(117+118)/(113+114) Count	(117+118)/(113+114) Variability [%]	(119+121)/(113+114)	(119+121)/(113+114) Count	(119+121)/(113+114) Variability [%]	114/113	114/113 Count	114/113 Variability [%]	115/116	115/116 Count	115/116 Variability [%]	117/118	117/118 Count	117/118 Variability [%]	119/121	119/121 Count	119/121 Variability [%]	IonScore	Exp Value	Charge	MH+ [Da]	ΔM [ppm]	RT [min]	# Missed Cleavages
	High	dETEFYLGk	2	1	1	P04646	N-Term(iTRAQ8plex); K9(iTRAQ8plex)	0	1.10799	2	6.77928	1.21289	2	4.85029	1.10903	2	3.28606	0.97886	2	4.05894	0.890939	2	4.26116	1.45137	2	6.71363	0.882234	2	11.2826	40.05	0.000499219	2	1709.92	-0.892626	20.764	0
P39032	60S ribosomal protein L36 OS=Rattus norvegicus GN=Rpl36 PE=1 SV=2 - [RL36_RAT]	34.88	10.48	1	1	1	1	1.13616	1		1.0542	1		1.06311	1		0.934707	1		1.07266	1		1.29764	1		0.93559	1		105	12.2599	11.5903
	A2	Sequence	# PSMs	# Proteins	# Protein Groups	Protein Group Accessions	Modifications	ΔCn	(115+116)/(113+114)	(115+116)/(113+114) Count	(115+116)/(113+114) Variability [%]	(117+118)/(113+114)	(117+118)/(113+114) Count	(117+118)/(113+114) Variability [%]	(119+121)/(113+114)	(119+121)/(113+114) Count	(119+121)/(113+114) Variability [%]	114/113	114/113 Count	114/113 Variability [%]	115/116	115/116 Count	115/116 Variability [%]	117/118	117/118 Count	117/118 Variability [%]	119/121	119/121 Count	119/121 Variability [%]	IonScore	Exp Value	Charge	MH+ [Da]	ΔM [ppm]	RT [min]	# Missed Cleavages
	High	eELSNVLAAMR	1	1	1	P39032	N-Term(iTRAQ8plex)	0	1.13616	1		1.0542	1		1.06311	1		0.934707	1		1.07266	1		1.29764	1		0.93559	1		34.88	0.00175547	2	1536.84	5.13665	9.51373	0
P83883	60S ribosomal protein L36a OS=Rattus norvegicus GN=Rpl36a PE=1 SV=2 - [RL36A_RAT]	33.43	8.49	1	1	1	2	1.00233	2	0.674573	0.732343	2	14.3889	1.00768	2	0.777513	1.02559	2	0.601062	0.902189	2	6.80345	1.0637	2	4.93246	1.01651	2	5.41607	106	12.4328	10.5796
	A2	Sequence	# PSMs	# Proteins	# Protein Groups	Protein Group Accessions	Modifications	ΔCn	(115+116)/(113+114)	(115+116)/(113+114) Count	(115+116)/(113+114) Variability [%]	(117+118)/(113+114)	(117+118)/(113+114) Count	(117+118)/(113+114) Variability [%]	(119+121)/(113+114)	(119+121)/(113+114) Count	(119+121)/(113+114) Variability [%]	114/113	114/113 Count	114/113 Variability [%]	115/116	115/116 Count	115/116 Variability [%]	117/118	117/118 Count	117/118 Variability [%]	119/121	119/121 Count	119/121 Variability [%]	IonScore	Exp Value	Charge	MH+ [Da]	ΔM [ppm]	RT [min]	# Missed Cleavages
	High	lEcVEPncR	2	1	1	P83883	N-Term(iTRAQ8plex); C3(Carbamidomethyl); N7(Deamidated); C8(Carbamidomethyl)	0	1.00233	2	0.674573	0.732343	2	14.3889	1.00768	2	0.777513	1.02559	2	0.601062	0.902189	2	6.80345	1.0637	2	4.93246	1.01651	2	5.41607	27.7	0.00169422	2	1481.69	-8.06353	13.2707	0
P50878	60S ribosomal protein L4 OS=Rattus norvegicus GN=Rpl4 PE=2 SV=3 - [RL4_RAT]	58.3908	2.38	1	1	1	3	1.16155	3	4.03134	0.732246	3	4.81265	1.05364	3	13.9531	0.94378	3	0.224215	0.955157	3	0.526208	1.13401	3	9.15876	0.945423	3	3.40894	421	47.227	10.9165
	A2	Sequence	# PSMs	# Proteins	# Protein Groups	Protein Group Accessions	Modifications	ΔCn	(115+116)/(113+114)	(115+116)/(113+114) Count	(115+116)/(113+114) Variability [%]	(117+118)/(113+114)	(117+118)/(113+114) Count	(117+118)/(113+114) Variability [%]	(119+121)/(113+114)	(119+121)/(113+114) Count	(119+121)/(113+114) Variability [%]	114/113	114/113 Count	114/113 Variability [%]	115/116	115/116 Count	115/116 Variability [%]	117/118	117/118 Count	117/118 Variability [%]	119/121	119/121 Count	119/121 Variability [%]	IonScore	Exp Value	Charge	MH+ [Da]	ΔM [ppm]	RT [min]	# Missed Cleavages
	High	fcIWTESAFR	3	1	1	P50878	N-Term(iTRAQ8plex); C2(Carbamidomethyl)	0	1.16155	3	4.03134	0.732246	3	4.81265	1.05364	3	13.9531	0.94378	3	0.224215	0.955157	3	0.526208	1.13401	3	9.15876	0.945423	3	3.40894	35.62	0.000603146	2	1620.82	5.64082	3.5477	0
P21533	60S ribosomal protein L6 OS=Rattus norvegicus GN=Rpl6 PE=1 SV=5 - [RL6_RAT]	164.147	10.74	1	3	3	5	1.16854	5	5.15381	0.709471	5	14.9272	1.012	5	3.52427	1.03559	5	4.4838	0.956207	5	7.0483	1.08568	5	17.0505	0.951937	5	4.71036	298	33.5409	10.7407
	A2	Sequence	# PSMs	# Proteins	# Protein Groups	Protein Group Accessions	Modifications	ΔCn	(115+116)/(113+114)	(115+116)/(113+114) Count	(115+116)/(113+114) Variability [%]	(117+118)/(113+114)	(117+118)/(113+114) Count	(117+118)/(113+114) Variability [%]	(119+121)/(113+114)	(119+121)/(113+114) Count	(119+121)/(113+114) Variability [%]	114/113	114/113 Count	114/113 Variability [%]	115/116	115/116 Count	115/116 Variability [%]	117/118	117/118 Count	117/118 Variability [%]	119/121	119/121 Count	119/121 Variability [%]	IonScore	Exp Value	Charge	MH+ [Da]	ΔM [ppm]	RT [min]	# Missed Cleavages
	High	sSITPGTVLIILTGR	3	1	1	P21533	N-Term(iTRAQ8plex)	0	1.18153	3	3.51201	0.695538	3	2.94107	1.012	3	3.52427	1.03559	3	4.4838	0.918704	3	5.93728	1.07424	3	1.57114	0.951937	3	3.37953	65.16	1.53919e-06	2	1832.11	-5.66832	6.63144	0
	High	yYPTEDVPR	1	1	1	P21533	N-Term(iTRAQ8plex)	0	1.0544	1		0.843804	1		0.994773	1		1.06195	1		1.0027	1		1.217	1		0.811039	1		34.72	0.000691439	2	1443.73	-8.39716	10.8082	0
	High	fVIATSTk	1	1	1	P21533	N-Term(iTRAQ8plex); K8(iTRAQ8plex)	0	1.16854	1		1.17605	1		1.27466	1		0.791268	1		1.09196	1		1.22382	1		1.10338	1		24.54	0.0107226	2	1474.9	-4.36495	11.8551	0
P05426	60S ribosomal protein L7 OS=Rattus norvegicus GN=Rpl7 PE=1 SV=2 - [RL7_RAT]	33.9333	6.54	1	2	2	3	1.10961	3	2.57541	0.969869	3	4.02242	0.998973	3	5.46907	0.857345	3	4.5036	1.0691	3	6.65438	1.11745	3	0.953468	1.00913	3	5.25235	260	30.3101	10.8726
	A2	Sequence	# PSMs	# Proteins	# Protein Groups	Protein Group Accessions	Modifications	ΔCn	(115+116)/(113+114)	(115+116)/(113+114) Count	(115+116)/(113+114) Variability [%]	(117+118)/(113+114)	(117+118)/(113+114) Count	(117+118)/(113+114) Variability [%]	(119+121)/(113+114)	(119+121)/(113+114) Count	(119+121)/(113+114) Variability [%]	114/113	114/113 Count	114/113 Variability [%]	115/116	115/116 Count	115/116 Variability [%]	117/118	117/118 Count	117/118 Variability [%]	119/121	119/121 Count	119/121 Variability [%]	IonScore	Exp Value	Charge	MH+ [Da]	ΔM [ppm]	RT [min]	# Missed Cleavages
	High	iALTDNSLVAR	1	1	1	P05426	N-Term(iTRAQ8plex)	0	1.13066	1		1.02315	1		0.998973	1		0.915797	1		1.0691	1		1.12466	1		0.939974	1		29.33	0.00507562	2	1476.87	1.10208	13.1641	0
	High	lAFVIR	2	1	1	P05426	N-Term(iTRAQ8plex)	0	1.10001	2	1.28754	0.956806	2	2.0106	1.0583	2	14.0876	0.844428	2	2.25095	1.11975	2	13.572	1.10645	2	1.46641	1.02716	2	2.62482	16.4	0.0228544	2	1022.67	-0.409822	10.1873	0
P62425	60S ribosomal protein L7a OS=Rattus norvegicus GN=Rpl7a PE=1 SV=2 - [RL7A_RAT]	48.0051	6.02	1	1	1	2	1.10071	2	27.6516	0.959467	2	2.08044	1.04834	2	19.8637	0.708685	2	7.01465	0.919394	2	10.9455	1.78804	2	8.91714	0.798289	2	9.77073	266	29.977	10.6089
	A2	Sequence	# PSMs	# Proteins	# Protein Groups	Protein Group Accessions	Modifications	ΔCn	(115+116)/(113+114)	(115+116)/(113+114) Count	(115+116)/(113+114) Variability [%]	(117+118)/(113+114)	(117+118)/(113+114) Count	(117+118)/(113+114) Variability [%]	(119+121)/(113+114)	(119+121)/(113+114) Count	(119+121)/(113+114) Variability [%]	114/113	114/113 Count	114/113 Variability [%]	115/116	115/116 Count	115/116 Variability [%]	117/118	117/118 Count	117/118 Variability [%]	119/121	119/121 Count	119/121 Variability [%]	IonScore	Exp Value	Charge	MH+ [Da]	ΔM [ppm]	RT [min]	# Missed Cleavages
	High	lkVPPAINQFTQALDR	2	1	1	P62425	N-Term(iTRAQ8plex); K2(iTRAQ8plex)	0	1.10071	2	27.6516	0.959467	2	2.08044	1.04834	2	19.8637	0.708685	2	7.01465	0.919394	2	10.9455	1.78804	2	8.91714	0.798289	2	9.77073	35.86	0.00153057	3	2419.44	6.27922	4.73158	1
P62919	60S ribosomal protein L8 OS=Rattus norvegicus GN=Rpl8 PE=2 SV=2 - [RL8_RAT]	96.1298	2.72	1	1	1	7	1.10405	7	5.00631	0.816383	7	10.9617	1.04538	7	9.15684	1.00194	7	14.5728	0.876202	7	8.79007	1.21038	7	8.27417	0.96754	7	3.98907	257	28.0073	11.0337
	A2	Sequence	# PSMs	# Proteins	# Protein Groups	Protein Group Accessions	Modifications	ΔCn	(115+116)/(113+114)	(115+116)/(113+114) Count	(115+116)/(113+114) Variability [%]	(117+118)/(113+114)	(117+118)/(113+114) Count	(117+118)/(113+114) Variability [%]	(119+121)/(113+114)	(119+121)/(113+114) Count	(119+121)/(113+114) Variability [%]	114/113	114/113 Count	114/113 Variability [%]	115/116	115/116 Count	115/116 Variability [%]	117/118	117/118 Count	117/118 Variability [%]	119/121	119/121 Count	119/121 Variability [%]	IonScore	Exp Value	Charge	MH+ [Da]	ΔM [ppm]	RT [min]	# Missed Cleavages
	High	aVDFAER	7	1	1	P62919	N-Term(iTRAQ8plex)	0	1.10405	7	5.00631	0.816383	7	10.9617	1.04538	7	9.15684	1.00194	7	14.5728	0.876202	7	8.79007	1.21038	7	8.27417	0.96754	7	3.98907	27.5	0.00533484	2	1111.6	-7.17875	10.5832	0
P17077	60S ribosomal protein L9 OS=Rattus norvegicus GN=Rpl9 PE=1 SV=1 - [RL9_RAT]	57.2502	9.38	1	2	2	2	1.14945	2	6.80287	1.27581	2	31.1039	1.18284	2	0.167775	0.955646	2	2.52071	0.958582	2	14.8283	1.1968	2	21.7924	0.699469	2	33.0743	192	21.8798	9.94971
	A2	Sequence	# PSMs	# Proteins	# Protein Groups	Protein Group Accessions	Modifications	ΔCn	(115+116)/(113+114)	(115+116)/(113+114) Count	(115+116)/(113+114) Variability [%]	(117+118)/(113+114)	(117+118)/(113+114) Count	(117+118)/(113+114) Variability [%]	(119+121)/(113+114)	(119+121)/(113+114) Count	(119+121)/(113+114) Variability [%]	114/113	114/113 Count	114/113 Variability [%]	115/116	115/116 Count	115/116 Variability [%]	117/118	117/118 Count	117/118 Variability [%]	119/121	119/121 Count	119/121 Variability [%]	IonScore	Exp Value	Charge	MH+ [Da]	ΔM [ppm]	RT [min]	# Missed Cleavages
	High	gTVQQPDE	1	1	1	P17077	N-Term(iTRAQ8plex)	0	1.20335	1		1.03936	1		1.1815	1		0.97203	1		1.05884	1		1.03496	1		0.562844	1		38	0.000198112	2	1177.6	-0.297372	13.7296	0
	High	fLDGIYVSEk	1	1	1	P17077	N-Term(iTRAQ8plex); K10(iTRAQ8plex)	0	1.09795	1		1.56604	1		1.18418	1		0.939538	1		0.867819	1		1.38395	1		0.869259	1		35.74	0.00146677	3	1779.01	-1.07233	16.1614	0
P47860	6-phosphofructokinase type C OS=Rattus norvegicus GN=Pfkp PE=2 SV=2 - [K6PP_RAT]	63.6933	2.54	1	2	2	2	1.17012	2	13.5689	1.34766	2	0.475806	1.14047	2	5.74561	0.962153	2	1.46069	1.2184	2	4.67736	0.977195	2	3.06937	0.801925	2	8.10917	788	85.6654	7.28369
	A2	Sequence	# PSMs	# Proteins	# Protein Groups	Protein Group Accessions	Modifications	ΔCn	(115+116)/(113+114)	(115+116)/(113+114) Count	(115+116)/(113+114) Variability [%]	(117+118)/(113+114)	(117+118)/(113+114) Count	(117+118)/(113+114) Variability [%]	(119+121)/(113+114)	(119+121)/(113+114) Count	(119+121)/(113+114) Variability [%]	114/113	114/113 Count	114/113 Variability [%]	115/116	115/116 Count	115/116 Variability [%]	117/118	117/118 Count	117/118 Variability [%]	119/121	119/121 Count	119/121 Variability [%]	IonScore	Exp Value	Charge	MH+ [Da]	ΔM [ppm]	RT [min]	# Missed Cleavages
	High	eLVVTNLGFDTR	1	1	1	P47860	N-Term(iTRAQ8plex)	0	1.28173	1		1.34334	1		1.09715	1		0.95272	1		1.25743	1		0.997632	1		0.759309	1		44.99	0.000167987	2	1667.93	0.596437	13.7139	0
	High	vGIAEGHk	1	1	1	P47860	N-Term(iTRAQ8plex); K8(iTRAQ8plex)	0	1.06823	1		1.35199	1		1.18549	1		0.971678	1		1.18058	1		0.957178	1		0.846932	1		36.13	0.000743532	2	1418.84	-9.29161	9.96693	0
P30835	6-phosphofructokinase, liver type OS=Rattus norvegicus GN=Pfkl PE=2 SV=3 - [K6PL_RAT]	203.246	4.23	1	3	3	9	1.04171	9	6.4506	0.757846	9	21.2416	0.594896	9	34.6885	0.912065	9	21.9737	0.99144	9	13.6303	1.00572	9	16.3028	0.881368	8	12.603	780	85.2844	7.40088
	A2	Sequence	# PSMs	# Proteins	# Protein Groups	Protein Group Accessions	Modifications	ΔCn	(115+116)/(113+114)	(115+116)/(113+114) Count	(115+116)/(113+114) Variability [%]	(117+118)/(113+114)	(117+118)/(113+114) Count	(117+118)/(113+114) Variability [%]	(119+121)/(113+114)	(119+121)/(113+114) Count	(119+121)/(113+114) Variability [%]	114/113	114/113 Count	114/113 Variability [%]	115/116	115/116 Count	115/116 Variability [%]	117/118	117/118 Count	117/118 Variability [%]	119/121	119/121 Count	119/121 Variability [%]	IonScore	Exp Value	Charge	MH+ [Da]	ΔM [ppm]	RT [min]	# Missed Cleavages
	High	nEWGSLLEELVk	4	1	1	P30835	N-Term(iTRAQ8plex); K12(iTRAQ8plex)	0	1.04188	4	6.11072	0.798684	4	18.4392	0.460682	4	17.584	0.794941	4	36.4567	0.988765	4	17.7998	1.07164	4	17.9376	1.05936	3	4.19637	50.01	8.13126e-05	3	2025.13	-7.03869	11.5965	0
	High	lNIIIIAEGAIDR	2	1	1	P30835	N-Term(iTRAQ8plex)	0	1.06508	2	4.84927	0.868926	2	5.06362	0.803326	2	16.1801	0.963567	2	8.15762	0.965095	2	3.99449	0.983191	2	3.36018	0.835343	2	1.87889	46.05	9.80838e-05	2	1715.04	2.4804	6.16693	0
	High	fDEAIQLR	3	1	1	P30835	N-Term(iTRAQ8plex)	0	0.9974	3	7.19989	0.621162	3	6.70081	0.594896	3	3.35064	0.7878	3	6.686	0.994805	3	13.4441	1.06527	3	23.4156	0.918218	3	1.57406	27.24	0.00726877	2	1295.72	-2.17415	17.9897	0
P47858	6-phosphofructokinase, muscle type OS=Rattus norvegicus GN=Pfkm PE=2 SV=3 - [K6PF_RAT]	170.116	7.44	1	4	4	4	0.837694	4	42.8041	0.711725	4	44.2184	0.928072	4	10.3599	1.09058	4	16.1717	1.10084	4	16.1187	1.09306	3	4.68952	0.867387	3	15.2209	780	85.5057	8.00146
	A2	Sequence	# PSMs	# Proteins	# Protein Groups	Protein Group Accessions	Modifications	ΔCn	(115+116)/(113+114)	(115+116)/(113+114) Count	(115+116)/(113+114) Variability [%]	(117+118)/(113+114)	(117+118)/(113+114) Count	(117+118)/(113+114) Variability [%]	(119+121)/(113+114)	(119+121)/(113+114) Count	(119+121)/(113+114) Variability [%]	114/113	114/113 Count	114/113 Variability [%]	115/116	115/116 Count	115/116 Variability [%]	117/118	117/118 Count	117/118 Variability [%]	119/121	119/121 Count	119/121 Variability [%]	IonScore	Exp Value	Charge	MH+ [Da]	ΔM [ppm]	RT [min]	# Missed Cleavages
	High	iVEIVDAITTTAQSHQR	1	1	1	P47858	N-Term(iTRAQ8plex)	0	0.417669	1		0.159087	1		0.312356	1		0.287289	1		1.30344	1								89.48	1.05393e-08	3	2186.21	1.1377	5.36139	0
	High	gITNLcVIGGDGSLTGADTFR	1	1	1	P47858	N-Term(iTRAQ8plex); C6(Carbamidomethyl)	0	0.717706	1		0.68778	1		0.938351	1		1.02996	1		1.05018	1		1.09306	1		0.867387	1		65.27	1.66413e-06	2	2428.24	-2.72821	12.1285	0
	High	sEWSDLLNDLQk	1	1	1	P47858	N-Term(iTRAQ8plex); K12(iTRAQ8plex)	0	1.24809	1		1.21627	1		1.05519	1		1.27925	1		0.917622	1		0.863913	1		0.783216	1		44.75	0.000271322	3	2056.13	7.55411	16.8699	0
	High	dQTDFEHR	1	1	1	P47858	N-Term(iTRAQ8plex)	0	0.97774	1		0.736504	1		0.917906	1		1.15476	1		1.15394	1		1.12817	1		1.00613	1		28.22	0.00150304	2	1351.65	-3.30068	11.2681	0
P85968	6-phosphogluconate dehydrogenase, decarboxylating OS=Rattus norvegicus GN=Pgd PE=1 SV=1 - [6PGD_RAT]	139.84	5.18	1	2	2	3	2.17694	3	62.3985	3.17621	3	48.5744	2.91242	3	44.0417	0.862845	2	22.7545	1.13951	3	31.3779	1.09439	3	8.77943	1.04119	3	7.19856	483	53.202	7.02002
	A2	Sequence	# PSMs	# Proteins	# Protein Groups	Protein Group Accessions	Modifications	ΔCn	(115+116)/(113+114)	(115+116)/(113+114) Count	(115+116)/(113+114) Variability [%]	(117+118)/(113+114)	(117+118)/(113+114) Count	(117+118)/(113+114) Variability [%]	(119+121)/(113+114)	(119+121)/(113+114) Count	(119+121)/(113+114) Variability [%]	114/113	114/113 Count	114/113 Variability [%]	115/116	115/116 Count	115/116 Variability [%]	117/118	117/118 Count	117/118 Variability [%]	119/121	119/121 Count	119/121 Variability [%]	IonScore	Exp Value	Charge	MH+ [Da]	ΔM [ppm]	RT [min]	# Missed Cleavages
	High	nPELQNLLLDDFFk	2	1	1	P85968	N-Term(iTRAQ8plex); K14(iTRAQ8plex)	0	2.78307	2	37.659	3.70954	2	23.321	3.35677	2	21.2878	0.741512	1		0.822557	2	51.2857	1.03012	2	8.99201	1.18377	2	19.2014	71.95	5.04228e-07	3	2314.27	-7.61452	12.3488	0
	High	aGQAVDDFIEk	1	1	1	P85968	N-Term(iTRAQ8plex); K11(iTRAQ8plex)	0	1.47866	1		1.96945	1		1.72167	1		1.00403	1		1.40114	1		1.16103	1		0.991906	1		41.29	0.000508968	2	1801	1.31865	18.4034	0
P06761	78 kDa glucose-regulated protein OS=Rattus norvegicus GN=Hspa5 PE=1 SV=1 - [GRP78_RAT]	1130.81	23.39	1	11	13	48	1.0859	28	7.60712	1.37803	29	19.8939	1.49842	28	9.53754	0.993242	27	11.1934	1.07098	28	11.1331	1.14988	27	10.8927	0.946407	27	10.1778	654	72.3024	5.16064
	A2	Sequence	# PSMs	# Proteins	# Protein Groups	Protein Group Accessions	Modifications	ΔCn	(115+116)/(113+114)	(115+116)/(113+114) Count	(115+116)/(113+114) Variability [%]	(117+118)/(113+114)	(117+118)/(113+114) Count	(117+118)/(113+114) Variability [%]	(119+121)/(113+114)	(119+121)/(113+114) Count	(119+121)/(113+114) Variability [%]	114/113	114/113 Count	114/113 Variability [%]	115/116	115/116 Count	115/116 Variability [%]	117/118	117/118 Count	117/118 Variability [%]	119/121	119/121 Count	119/121 Variability [%]	IonScore	Exp Value	Charge	MH+ [Da]	ΔM [ppm]	RT [min]	# Missed Cleavages
	High	vEIIANDQGNR	16	2	2	P06761;P63018	N-Term(iTRAQ8plex)	0																						77.93	8.77802e-08	3	1532.85	7.92898	14.4312	0
	High	gVPQIEVTFEIDVNGILR	1	1	1	P06761	N-Term(iTRAQ8plex)	0				1.02421	1																	67.66	1.57684e-06	3	2303.28	-6.74705	13.0082	0
	High	eLEEIVQPIISk	4	1	1	P06761	N-Term(iTRAQ8plex); K12(iTRAQ8plex)	0	0.928887	4	30.4761	1.57282	4	6.57916	1.59787	4	3.0408	0.844968	4	7.47108	1.05166	4	21.8002	1.09769	4	8.61083	0.9597	4	7.80423	58.95	7.95939e-06	2	2006.21	5.22137	10.2821	0
	High	iTPSYVAFTPEGER	7	1	1	P06761	N-Term(iTRAQ8plex)	0	1.08375	7	12.1321	1.22267	7	9.7277	1.44869	7	5.72955	1.03693	7	14.1817	0.961656	7	10.8226	1.08312	7	9.89367	1.02535	7	10.2002	52.91	2.12348e-05	2	1870.98	-0.845076	15.3313	0
	High	tFAPEEISAMVLTk	1	1	1	P06761	N-Term(iTRAQ8plex); K14(iTRAQ8plex)	0	1.10236	1		2.53051	1		1.37181	1		0.966589	1		2.4042	1		1.82924	1		0.768365	1		48.98	9.67523e-05	3	2145.23	9.77801	10.6796	0
	High	iINEPTAAAIAYGLDk	2	2	2	P06761;P63018	N-Term(iTRAQ8plex); K16(iTRAQ8plex)	0																						48.02	0.000128575	3	2268.31	0.696116	15.8997	0
	High	tWNDPSVQQDIk	3	1	1	P06761	N-Term(iTRAQ8plex); K12(iTRAQ8plex)	0	1.08806	3	4.29275	1.56766	3	4.93204	1.60642	3	1.88909	0.910743	3	9.84365	1.44687	3	19.4315	1.17328	3	20.2314	1.05106	3	1.10138	47.89	0.000124354	2	2039.11	6.42654	14.7496	0
	High	sDIDEIVLVGGSTR	2	1	1	P06761	N-Term(iTRAQ8plex)	0	1.10449	2	7.36549	1.27346	2	9.86579	1.494	2	6.93296	1.14254	2	0.249619	0.93568	2	22.5337	1.14154	2	21.2768	0.993296	2	3.49736	47.34	8.94832e-05	2	1764.96	-1.88223	11.7645	0
	High	eTAEAYLGk	3	1	1	P06761	N-Term(iTRAQ8plex); K9(iTRAQ8plex)	0	1.05042	3	0.0524176	1.4064	3	3.02138	1.4129	3	4.30511	0.993242	3	1.05029	1.02434	3	0.669612	1.22157	3	0.54119	0.867913	3	2.81167	44.44	0.000237435	2	1589.91	3.57736	11.3668	0
	High	akFEELNMDLFR	2	1	1	P06761	N-Term(iTRAQ8plex); K2(iTRAQ8plex)	0	1.16328	2	12.3579	1.71063	2	2.54774	1.7484	2	1.44178	1.00816	2	1.13242	1.11988	2	3.46636	1.16399	2	1.34524	0.912141	2	4.68661	43	0.000355843	2	2121.17	2.91034	7.3243	1
	High	kSDIDEIVLVGGSTR	2	1	1	P06761	N-Term(iTRAQ8plex); K1(iTRAQ8plex)	0	1.48675	2	16.6778	1.37827	2	96.222	1.16555	2	104.778	1.20221	1		1.22195	2	63.6122	0.906817	1		0.971347	1		38	0.00125207	2	2197.26	-3.52877	7.81535	1
	High	vLEDSDLk	3	1	1	P06761	N-Term(iTRAQ8plex); K8(iTRAQ8plex)	0	1.09185	3	3.88455	1.46571	3	10.5855	1.44909	3	11.8853	0.857677	3	0.805176	1.06509	3	0.666562	1.07848	3	5.35592	0.907234	3	0.172498	35.84	0.00179825	2	1526.88	-3.37344	13.8046	0
	High	dAGTIAGLNVMR	1	1	1	P06761	N-Term(iTRAQ8plex)	0	1.01196	1		1.2412	1		1.17895	1		1.01705	1		1.16216	1		1.23727	1		0.948353	1		30.7	0.00353222	2	1521.83	-3.45844	12.9105	0
	High	vEIIAnDQGNR	1	2	2	P06761;P63018	N-Term(iTRAQ8plex); N6(Deamidated)	0																						29.76	0.00549545	2	1533.83	7.2117	19.3808	0
Q9JMI1	Acetoacetyl-CoA synthetase OS=Rattus norvegicus GN=Aacs PE=1 SV=1 - [AACS_RAT]	40.61	1.64	1	1	1	1	1.20715	1		1.20832	1		1.03274	1		1.13639	1		1.06592	1		0.752122	1		0.996459	1		672	74.9919	6.49365
	A2	Sequence	# PSMs	# Proteins	# Protein Groups	Protein Group Accessions	Modifications	ΔCn	(115+116)/(113+114)	(115+116)/(113+114) Count	(115+116)/(113+114) Variability [%]	(117+118)/(113+114)	(117+118)/(113+114) Count	(117+118)/(113+114) Variability [%]	(119+121)/(113+114)	(119+121)/(113+114) Count	(119+121)/(113+114) Variability [%]	114/113	114/113 Count	114/113 Variability [%]	115/116	115/116 Count	115/116 Variability [%]	117/118	117/118 Count	117/118 Variability [%]	119/121	119/121 Count	119/121 Variability [%]	IonScore	Exp Value	Charge	MH+ [Da]	ΔM [ppm]	RT [min]	# Missed Cleavages
	High	sDGTLNPnGVR	1	1	1	Q9JMI1	N-Term(iTRAQ8plex); N8(Deamidated)	0	1.20715	1		1.20832	1		1.03274	1		1.13639	1		1.06592	1		0.752122	1		0.996459	1		40.61	0.000238964	2	1434.75	-1.69205	15.0454	0
Q5XI22	Acetyl-CoA acetyltransferase, cytosolic OS=Rattus norvegicus GN=Acat2 PE=1 SV=1 - [THIC_RAT]	116.91	2.77	1	1	1	3	1.04316	3	14.8792	1.17031	3	19.0391	1.63568	3	13.77	0.746077	3	13.8829	1.14463	3	19.141	0.879913	3	0.587081	1.16546	3	8.71449	397	41.0821	7.29834
	A2	Sequence	# PSMs	# Proteins	# Protein Groups	Protein Group Accessions	Modifications	ΔCn	(115+116)/(113+114)	(115+116)/(113+114) Count	(115+116)/(113+114) Variability [%]	(117+118)/(113+114)	(117+118)/(113+114) Count	(117+118)/(113+114) Variability [%]	(119+121)/(113+114)	(119+121)/(113+114) Count	(119+121)/(113+114) Variability [%]	114/113	114/113 Count	114/113 Variability [%]	115/116	115/116 Count	115/116 Variability [%]	117/118	117/118 Count	117/118 Variability [%]	119/121	119/121 Count	119/121 Variability [%]	IonScore	Exp Value	Charge	MH+ [Da]	ΔM [ppm]	RT [min]	# Missed Cleavages
	High	iLVTLLHTLER	3	1	1	Q5XI22	N-Term(iTRAQ8plex)	0	1.04316	3	14.8792	1.17031	3	19.0391	1.63568	3	13.77	0.746077	3	13.8829	1.14463	3	19.141	0.879913	3	0.587081	1.16546	3	8.71449	65.7	4.44103e-07	3	1612.01	0.58133	5.22571	0
P17764	Acetyl-CoA acetyltransferase, mitochondrial OS=Rattus norvegicus GN=Acat1 PE=1 SV=1 - [THIL_RAT]	97.4793	3.77	1	2	2	6	0.728304	6	0.914787	0.877102	6	6.51128	0.79971	6	8.14827	0.941125	6	16.7394	1.15475	6	7.77444	1.22079	6	16.4762	0.950952	6	5.96502	424	44.6664	8.76318
	A2	Sequence	# PSMs	# Proteins	# Protein Groups	Protein Group Accessions	Modifications	ΔCn	(115+116)/(113+114)	(115+116)/(113+114) Count	(115+116)/(113+114) Variability [%]	(117+118)/(113+114)	(117+118)/(113+114) Count	(117+118)/(113+114) Variability [%]	(119+121)/(113+114)	(119+121)/(113+114) Count	(119+121)/(113+114) Variability [%]	114/113	114/113 Count	114/113 Variability [%]	115/116	115/116 Count	115/116 Variability [%]	117/118	117/118 Count	117/118 Variability [%]	119/121	119/121 Count	119/121 Variability [%]	IonScore	Exp Value	Charge	MH+ [Da]	ΔM [ppm]	RT [min]	# Missed Cleavages
	High	dGLTDVYNk	4	1	1	P17764	N-Term(iTRAQ8plex); K9(iTRAQ8plex)	0	0.73347	4	1.12192	0.914625	4	6.21678	0.79971	4	15.9486	0.874869	4	10.2709	1.23114	4	12.7943	1.33772	4	13.6234	0.922547	4	6.43537	38.69	0.000905889	2	1632.89	-7.70014	12.8849	0
	High	lEDLIVk	2	1	1	P17764	N-Term(iTRAQ8plex); K7(iTRAQ8plex)	0	0.724186	2	0.577246	0.839454	2	1.0922	0.7843	2	8.14827	1.0153	2	5.80543	1.1201	2	3.03057	1.09321	2	2.84553	0.977135	2	1.94206	29.27	0.0071574	2	1437.91	-3.96737	16.2724	0
P11497	Acetyl-CoA carboxylase 1 OS=Rattus norvegicus GN=Acaca PE=1 SV=1 - [ACACA_RAT]	148.494	0.9	1	2	2	6	1.23784	6	3.37311	1.17247	6	12.1997	1.16835	6	11.2549	0.971779	6	9.87284	0.981939	6	9.53672	1.11466	6	2.19345	0.985138	6	8.69519	2345	265.025	6.39209
	A2	Sequence	# PSMs	# Proteins	# Protein Groups	Protein Group Accessions	Modifications	ΔCn	(115+116)/(113+114)	(115+116)/(113+114) Count	(115+116)/(113+114) Variability [%]	(117+118)/(113+114)	(117+118)/(113+114) Count	(117+118)/(113+114) Variability [%]	(119+121)/(113+114)	(119+121)/(113+114) Count	(119+121)/(113+114) Variability [%]	114/113	114/113 Count	114/113 Variability [%]	115/116	115/116 Count	115/116 Variability [%]	117/118	117/118 Count	117/118 Variability [%]	119/121	119/121 Count	119/121 Variability [%]	IonScore	Exp Value	Charge	MH+ [Da]	ΔM [ppm]	RT [min]	# Missed Cleavages
	High	iGSFGPQEDLLFLR	4	1	1	P11497	N-Term(iTRAQ8plex)	0	1.23784	4	2.46049	1.31076	4	11.6673	1.18358	4	11.2549	0.919442	4	3.34756	0.996095	4	12.2775	1.07284	4	6.62112	0.985138	4	7.00685	55.28	1.58618e-05	2	1896.04	-6.13791	14.2174	0
	High	tFEDFVR	2	1	1	P11497	N-Term(iTRAQ8plex)	0	1.15288	2	14.6936	1.10905	2	0.902963	1.12713	2	10.2541	1.02216	2	1.64112	0.981939	2	5.35753	1.12409	2	0.919858	0.92109	2	14.1614	24.29	0.0046549	2	1217.64	-2.03392	12.6414	0
P49911	Acidic leucine-rich nuclear phosphoprotein 32 family member A OS=Rattus norvegicus GN=Anp32a PE=2 SV=1 - [AN32A_RAT]	68.6878	6.88	1	1	2	3	0.800671	1		0.869993	1		0.986979	1		0.979807	1		1.01457	1		1.05896	1		0.815606	1		247	28.5473	4.08154
	A2	Sequence	# PSMs	# Proteins	# Protein Groups	Protein Group Accessions	Modifications	ΔCn	(115+116)/(113+114)	(115+116)/(113+114) Count	(115+116)/(113+114) Variability [%]	(117+118)/(113+114)	(117+118)/(113+114) Count	(117+118)/(113+114) Variability [%]	(119+121)/(113+114)	(119+121)/(113+114) Count	(119+121)/(113+114) Variability [%]	114/113	114/113 Count	114/113 Variability [%]	115/116	115/116 Count	115/116 Variability [%]	117/118	117/118 Count	117/118 Variability [%]	119/121	119/121 Count	119/121 Variability [%]	IonScore	Exp Value	Charge	MH+ [Da]	ΔM [ppm]	RT [min]	# Missed Cleavages
	High	dLSTIEPLk	2	2	2	Q9EST6;P49911	N-Term(iTRAQ8plex); K9(iTRAQ8plex)	0																						41.73	0.000574072	2	1623.98	-0.564701	11.9213	0
	High	eLVLDNcR	1	1	1	P49911	N-Term(iTRAQ8plex); C7(Carbamidomethyl)	0	0.800671	1		0.869993	1		0.986979	1		0.979807	1		1.01457	1		1.05896	1		0.815606	1		27.68	0.00648311	2	1322.69	-8.94315	11.0967	0
Q9EST6	Acidic leucine-rich nuclear phosphoprotein 32 family member B OS=Rattus norvegicus GN=Anp32b PE=2 SV=1 - [AN32B_RAT]	76.4441	7.72	1	1	2	3	0.841578	1		0.903842	1		0.978888	1		0.93691	1		1.01869	1		1.09231	1		0.873441	1		272	31.042	3.99268
	A2	Sequence	# PSMs	# Proteins	# Protein Groups	Protein Group Accessions	Modifications	ΔCn	(115+116)/(113+114)	(115+116)/(113+114) Count	(115+116)/(113+114) Variability [%]	(117+118)/(113+114)	(117+118)/(113+114) Count	(117+118)/(113+114) Variability [%]	(119+121)/(113+114)	(119+121)/(113+114) Count	(119+121)/(113+114) Variability [%]	114/113	114/113 Count	114/113 Variability [%]	115/116	115/116 Count	115/116 Variability [%]	117/118	117/118 Count	117/118 Variability [%]	119/121	119/121 Count	119/121 Variability [%]	IonScore	Exp Value	Charge	MH+ [Da]	ΔM [ppm]	RT [min]	# Missed Cleavages
	High	dISTLEPLk	2	2	2	Q9EST6;P49911	N-Term(iTRAQ8plex); K9(iTRAQ8plex)	0																						41.73	0.000574072	2	1623.98	-0.564701	11.9213	0
	High	sLDLFGcEVTNR	1	1	1	Q9EST6	N-Term(iTRAQ8plex); C7(Carbamidomethyl)	0	0.841578	1		0.903842	1		0.978888	1		0.93691	1		1.01869	1		1.09231	1		0.873441	1		34.5	0.000975737	2	1714.87	-0.161345	9.61965	0
Q5XIE0	Acidic leucine-rich nuclear phosphoprotein 32 family member E OS=Rattus norvegicus GN=Anp32e PE=2 SV=1 - [AN32E_RAT]	59.32	6.59	1	1	1	1	0.735208	1		0.622806	1		0.770181	1		1.12604	1		0.953755	1		1.31126	1		0.765506	1		258	29.4003	3.89111
	A2	Sequence	# PSMs	# Proteins	# Protein Groups	Protein Group Accessions	Modifications	ΔCn	(115+116)/(113+114)	(115+116)/(113+114) Count	(115+116)/(113+114) Variability [%]	(117+118)/(113+114)	(117+118)/(113+114) Count	(117+118)/(113+114) Variability [%]	(119+121)/(113+114)	(119+121)/(113+114) Count	(119+121)/(113+114) Variability [%]	114/113	114/113 Count	114/113 Variability [%]	115/116	115/116 Count	115/116 Variability [%]	117/118	117/118 Count	117/118 Variability [%]	119/121	119/121 Count	119/121 Variability [%]	IonScore	Exp Value	Charge	MH+ [Da]	ΔM [ppm]	RT [min]	# Missed Cleavages
	High	eLEFLSMANVELSSLAR	1	1	1	Q5XIE0	N-Term(iTRAQ8plex)	0	0.735208	1		0.622806	1		0.770181	1		1.12604	1		0.953755	1		1.31126	1		0.765506	1		59.32	1.02916e-05	2	2213.18	1.76561	8.08863	0
Q9ER34	Aconitate hydratase, mitochondrial OS=Rattus norvegicus GN=Aco2 PE=1 SV=2 - [ACON_RAT]	587.244	9.62	1	5	5	17	1.08646	16	12.3905	1.04656	16	9.67092	1.08894	16	11.6814	1.07088	16	10.0508	0.994693	16	10.5512	1.05696	16	12.4277	0.98503	16	9.28583	780	85.38	7.82568
	A2	Sequence	# PSMs	# Proteins	# Protein Groups	Protein Group Accessions	Modifications	ΔCn	(115+116)/(113+114)	(115+116)/(113+114) Count	(115+116)/(113+114) Variability [%]	(117+118)/(113+114)	(117+118)/(113+114) Count	(117+118)/(113+114) Variability [%]	(119+121)/(113+114)	(119+121)/(113+114) Count	(119+121)/(113+114) Variability [%]	114/113	114/113 Count	114/113 Variability [%]	115/116	115/116 Count	115/116 Variability [%]	117/118	117/118 Count	117/118 Variability [%]	119/121	119/121 Count	119/121 Variability [%]	IonScore	Exp Value	Charge	MH+ [Da]	ΔM [ppm]	RT [min]	# Missed Cleavages
	High	vGLIGScTNSSYEDMGR	2	1	1	Q9ER34	N-Term(iTRAQ8plex); C7(Carbamidomethyl)	0	1.06784	2	8.5001	1.24174	2	19.5631	1.16887	2	5.0087	1.32359	2	18.311	0.913535	2	6.43386	1.12543	2	8.89869	1.00201	2	5.30439	95.25	4.47807e-10	2	2150.02	0.294817	11.7157	0
	High	dVGGIVLANAcGPcIGQWDR	2	1	1	Q9ER34	N-Term(iTRAQ8plex); C11(Carbamidomethyl); C14(Carbamidomethyl)	0	1.06696	1		0.903437	1		1.04991	1		1.09648	1		0.807109	1		0.958639	1		0.978768	1		89.81	3.65652e-09	2	2462.21	-5.09092	11.6169	0
	High	nAVTQEFGPVPDTAR	5	1	1	Q9ER34	N-Term(iTRAQ8plex)	0	1.11413	5	9.72325	1.03571	5	1.05061	1.12722	5	8.90987	0.987356	5	14.3941	1.07066	5	8.61469	0.970828	5	9.56172	1.05528	5	11.3445	67.42	9.96237e-07	2	1905.99	-1.99135	16.878	0
	High	wVVIGDENYGEGSSR	4	1	1	Q9ER34	N-Term(iTRAQ8plex)	0	1.11395	4	6.06741	0.995937	4	13.7292	1.01476	4	15.7814	1.11201	4	4.05705	0.908308	4	15.6392	1.09596	4	6.9331	0.917765	4	13.1799	44.43	8.83418e-05	2	1971.97	-1.57811	11.1213	0
	High	eGWPLDIR	4	1	1	Q9ER34	N-Term(iTRAQ8plex)	0	0.952967	4	7.63625	1.10947	4	0.993476	0.937837	4	10.3697	0.99887	4	2.58374	1.05543	4	5.14621	1.15298	4	3.75764	0.852248	4	4.26892	35.61	0.00078315	2	1289.71	-2.0416	10.0791	0
P60711	Actin, cytoplasmic 1 OS=Rattus norvegicus GN=Actb PE=1 SV=1 - [ACTB_RAT]	4291.84	41.87	2	13	13	169	1.37091	157	11.701	1.42988	158	17.4833	1.12225	158	10.9497	0.98791	151	14.807	1.02889	152	11.9459	1.1242	156	11.9412	0.948556	149	14.2275	375	41.7097	5.47803
	A2	Sequence	# PSMs	# Proteins	# Protein Groups	Protein Group Accessions	Modifications	ΔCn	(115+116)/(113+114)	(115+116)/(113+114) Count	(115+116)/(113+114) Variability [%]	(117+118)/(113+114)	(117+118)/(113+114) Count	(117+118)/(113+114) Variability [%]	(119+121)/(113+114)	(119+121)/(113+114) Count	(119+121)/(113+114) Variability [%]	114/113	114/113 Count	114/113 Variability [%]	115/116	115/116 Count	115/116 Variability [%]	117/118	117/118 Count	117/118 Variability [%]	119/121	119/121 Count	119/121 Variability [%]	IonScore	Exp Value	Charge	MH+ [Da]	ΔM [ppm]	RT [min]	# Missed Cleavages
	High	lcYVALDFEQEMATAASSSSLEk	2	2	1	P60711	N-Term(iTRAQ8plex); C2(Carbamidomethyl); K23(iTRAQ8plex)	0																						100.13	6.8421e-10	3	3158.58	-0.455973	8.56132	0
	High	dLYANTVLSGGTTMYPGIADR	3	2	1	P60711	N-Term(iTRAQ8plex)	0	1.73889	3	28.2601	2.0881	3	36.2052	1.4319	3	11.8089	1.59517	3	8.67692	1.21998	3	2.69325	1.16573	3	6.50122	0.957874	3	14.7587	95.84	1.49854e-09	2	2519.27	-3.38114	12.4338	0
	High	sYELPDGQVITIGnER	5	2	1	P60711	N-Term(iTRAQ8plex); N14(Deamidated)	0	1.31206	3	20.1022	1.42681	3	23.5442	1.38558	3	3.88709	0.759668	3	0.43974	0.998899	3	0.817355	1.00581	3	7.91687	0.924153	3	16.7831	81.59	3.43246e-08	2	2096.08	-0.475858	13.7494	0
	High	sYELPDGQVITIGNER	42	2	1	P60711	N-Term(iTRAQ8plex)	0	1.39492	40	15.968	1.42775	40	14.184	1.14092	40	13.5578	0.939627	39	22.317	1.02447	40	12.5503	1.10223	40	11.808	0.932642	40	17.2014	68.68	8.33441e-07	2	2095.09	-2.8615	10.4572	0
	High	syELPDGQVITIGNER	5	2	1	P60711	N-Term(iTRAQ8plex); Y2(iTRAQ8plex)	0	1.61655	3	7.44068	1.49828	3	17.7971	1.10236	3	7.62033	0.690711	3	36.8283	1.25387	3	7.43475	0.694867	3	0.561892	0.896047	3	10.251	65.91	2.42344e-06	2	2399.3	-3.0232	9.86388	0
	High	lcyVALDFEQEMATAASSSSLEk	2	2	1	P60711	N-Term(iTRAQ8plex); C2(Carbamidomethyl); Y3(iTRAQ8plex); K23(iTRAQ8plex)	0	1.34118	1		0.994246	1		0.392852	1		1.03618	1		0.651679	1		0.964723	1					64.79	3.58446e-06	3	3462.76	-9.45142	8.92778	0
	High	dSYVGDEAQSk	9	2	1	P60711	N-Term(iTRAQ8plex); K11(iTRAQ8plex)	0	1.17649	9	9.05519	1.77483	9	11.2637	1.01553	9	12.3441	0.972669	9	6.64238	1.00342	8	9.73374	1.37117	9	21.8612	0.877464	8	11.7865	64.51	1.39829e-06	3	1806.92	-9.58414	14.9804	0
	High	aGFAGDDAPR	26	2	1	P60711	N-Term(iTRAQ8plex)	0	1.33323	26	7.56436	1.38202	26	13.7963	1.12203	26	10.1349	0.98791	25	7.65888	0.998009	25	7.14379	1.08543	26	9.28002	0.904969	24	6.39264	62.53	1.06109e-06	3	1280.64	-8.78591	13.176	0
	High	vAPEEHPVLLTEAPLNPk	7	2	1	P60711	N-Term(iTRAQ8plex); K18(iTRAQ8plex)	0	1.47099	5	22.901	1.40828	6	17.9077	1.21974	6	9.67681	1.13286	3	1.04545	1.4862	4	22.2226	1.30022	4	17.3931	0.986386	4	29.5594	58.5	1.2501e-05	2	2562.47	-2.50684	7.84168	0
	High	hQGVMVGMGQk	14	2	1	P60711	N-Term(iTRAQ8plex); K11(iTRAQ8plex)	0	1.38673	14	5.21306	1.80307	14	9.46599	1.17941	14	5.78617	1.08336	14	9.1653	1.22803	14	4.2999	1.16859	14	4.83253	1.09245	14	4.40495	49.02	6.14039e-05	2	1779.97	-7.81373	6.33221	0
	High	dLTDYLMk	12	2	1	P60711	N-Term(iTRAQ8plex); K8(iTRAQ8plex)	0	1.33525	12	19.4569	1.66467	12	19.8548	0.975994	12	19.3369	0.941404	10	29.3087	1.07813	10	13.863	1.18607	12	19.212	0.951649	9	30.479	40.28	0.000506283	2	1606.89	-3.6022	10.7007	0
	High	gYSFTTTAER	19	2	1	P60711	N-Term(iTRAQ8plex)	0	1.36752	19	6.70218	1.27146	19	3.79118	1.12159	19	4.23015	1.01364	19	4.61462	0.939129	19	7.6655	1.12956	19	4.80424	0.939422	19	4.65499	38.1	0.000356228	2	1436.72	-8.05346	9.89821	0
	High	eITALAPSTMk	1	2	1	P60711	N-Term(iTRAQ8plex); K11(iTRAQ8plex)	0	1.1077	1		1.55449	1		0.918041	1		0.960428	1		1.26801	1		1.40535	1		0.827301	1		36.9	0.00152109	2	1770.03	1.13231	8.84125	0
	High	cDVDIR	6	2	1	P60711	N-Term(iTRAQ8plex); C1(Carbamidomethyl)	0	1.41499	6	2.03263	1.32283	6	3.92468	1.13608	6	6.28592	0.937981	6	4.04693	1.06309	6	4.25012	0.979859	6	10.0706	1.05418	6	15.4953	33.35	0.00161833	2	1081.55	-9.06478	13.3347	0
	High	dLTDYLmk	4	2	1	P60711	N-Term(iTRAQ8plex); M7(Oxidation); K8(iTRAQ8plex)	0	1.52339	4	21.6699	1.2053	4	25.0781	0.947614	4	15.0542	0.794246	4	10.0999	1.03325	4	12.9272	1.0436	4	26.1081	0.995976	4	24.0237	32.95	0.00263635	3	1622.89	0.874632	14.1572	0
	High	dSYVGDEAQSkR	1	2	1	P60711	N-Term(iTRAQ8plex); K11(iTRAQ8plex)	0	1.23389	1		1.6965	1		0.938312	1		0.760071	1		1.41417	1		0.975373	1		0.660785	1		31.42	0.00425453	2	1963.02	-9.5847	9.36737	1
	High	syELPDGQVITIGnER	1	2	1	P60711	N-Term(iTRAQ8plex); Y2(iTRAQ8plex); N14(Deamidated)	0																						30.51	0.00809173	3	2400.28	-1.14886	9.93334	0
	High	aVFPSIVGRPR	9	2	1	P60711	N-Term(iTRAQ8plex)	0	1.50699	9	8.89465	1.36693	9	8.31036	1.14443	9	15.4279	1.01841	9	27.8222	0.969752	9	12.4616	1.1519	9	16.7548	0.837449	9	36.4362	29.28	0.00731799	3	1502.92	3.68997	0.0949667	0
	High	gySFTTTAER	1	2	1	P60711	N-Term(iTRAQ8plex); Y2(iTRAQ8plex)	0	1.3886	1		1.33464	1		1.2987	1		0.870522	1		1.0474	1		0.904775	1		1.03946	1		27.21	0.00893507	2	1740.93	-6.24718	2.19592	0
Q5M7U6	Actin-related protein 2 OS=Rattus norvegicus GN=Actr2 PE=2 SV=1 - [ARP2_RAT]	63.7745	4.57	1	2	2	2	1.26104	2	18.3599	1.31746	2	37.9912	1.21793	2	7.33857	1.02831	2	8.85483	1.06736	2	7.72561	0.996744	2	7.76914	0.9471	2	4.67124	394	44.7052	6.7417
	A2	Sequence	# PSMs	# Proteins	# Protein Groups	Protein Group Accessions	Modifications	ΔCn	(115+116)/(113+114)	(115+116)/(113+114) Count	(115+116)/(113+114) Variability [%]	(117+118)/(113+114)	(117+118)/(113+114) Count	(117+118)/(113+114) Variability [%]	(119+121)/(113+114)	(119+121)/(113+114) Count	(119+121)/(113+114) Variability [%]	114/113	114/113 Count	114/113 Variability [%]	115/116	115/116 Count	115/116 Variability [%]	117/118	117/118 Count	117/118 Variability [%]	119/121	119/121 Count	119/121 Variability [%]	IonScore	Exp Value	Charge	MH+ [Da]	ΔM [ppm]	RT [min]	# Missed Cleavages
	High	dLMVGDEASELR	1	1	1	Q5M7U6	N-Term(iTRAQ8plex)	0	1.42583	1		1.6877	1		1.27965	1		1.09146	1		1.12437	1		1.05029	1		0.977398	1		48.78	4.30411e-05	2	1638.83	-1.34015	21.2426	0
	High	iEDPPR	1	1	1	Q5M7U6	N-Term(iTRAQ8plex)	0	1.11531	1		1.02844	1		1.15919	1		0.968801	1		1.01324	1		0.945932	1		0.91774	1		32.76	0.0029926	2	1030.57	-9.41537	12.2494	0
P85970	Actin-related protein 2/3 complex subunit 2 OS=Rattus norvegicus GN=Arpc2 PE=1 SV=1 - [ARPC2_RAT]	73.5054	3	1	1	1	2	1.21507	2	25.9178	1.42438	2	43.7439	1.59824	2	30.8669	0.905996	2	42.5422	1.09746	2	6.85592	1.18239	2	22.0992	0.986432	2	28.6702	300	34.3695	7.35693
	A2	Sequence	# PSMs	# Proteins	# Protein Groups	Protein Group Accessions	Modifications	ΔCn	(115+116)/(113+114)	(115+116)/(113+114) Count	(115+116)/(113+114) Variability [%]	(117+118)/(113+114)	(117+118)/(113+114) Count	(117+118)/(113+114) Variability [%]	(119+121)/(113+114)	(119+121)/(113+114) Count	(119+121)/(113+114) Variability [%]	114/113	114/113 Count	114/113 Variability [%]	115/116	115/116 Count	115/116 Variability [%]	117/118	117/118 Count	117/118 Variability [%]	119/121	119/121 Count	119/121 Variability [%]	IonScore	Exp Value	Charge	MH+ [Da]	ΔM [ppm]	RT [min]	# Missed Cleavages
	High	iIEETLALk	2	1	1	P85970	N-Term(iTRAQ8plex); K9(iTRAQ8plex)	0	1.21507	2	25.9178	1.42438	2	43.7439	1.59824	2	30.8669	0.905996	2	42.5422	1.09746	2	6.85592	1.18239	2	22.0992	0.986432	2	28.6702	52.77	1.71745e-05	3	1638.04	4.58801	8.17544	0
Q4V7C7	Actin-related protein 3 OS=Rattus norvegicus GN=Actr3 PE=1 SV=1 - [ARP3_RAT]	108.314	5.02	1	2	2	5	1.25733	5	2.69879	1.33016	5	5.26204	1.19333	5	4.72206	0.930348	5	14.6209	1.0246	5	4.86195	1.16571	5	6.64415	0.941004	5	6.38343	418	47.327	5.88428
	A2	Sequence	# PSMs	# Proteins	# Protein Groups	Protein Group Accessions	Modifications	ΔCn	(115+116)/(113+114)	(115+116)/(113+114) Count	(115+116)/(113+114) Variability [%]	(117+118)/(113+114)	(117+118)/(113+114) Count	(117+118)/(113+114) Variability [%]	(119+121)/(113+114)	(119+121)/(113+114) Count	(119+121)/(113+114) Variability [%]	114/113	114/113 Count	114/113 Variability [%]	115/116	115/116 Count	115/116 Variability [%]	117/118	117/118 Count	117/118 Variability [%]	119/121	119/121 Count	119/121 Variability [%]	IonScore	Exp Value	Charge	MH+ [Da]	ΔM [ppm]	RT [min]	# Missed Cleavages
	High	eFSIDVGYER	4	1	1	Q4V7C7	N-Term(iTRAQ8plex)	0	1.24594	4	3.89986	1.35396	4	2.94038	1.1865	4	3.2105	0.861148	4	13.7401	1.04453	4	7.24571	1.17488	4	3.31933	0.920983	4	8.4771	42.61	0.000109655	2	1518.78	0.573299	14.7221	0
	High	dYEEIGPSIcR	1	1	1	Q4V7C7	N-Term(iTRAQ8plex); C10(Carbamidomethyl)	0	1.26273	1		1.24363	1		1.25651	1		1.02624	1		1.0246	1		0.985125	1		0.953714	1		33.6	0.000589296	2	1642.79	-8.2469	12.4958	0
Q63396	Activated RNA polymerase II transcriptional coactivator p15 OS=Rattus norvegicus GN=Sub1 PE=2 SV=3 - [TCP4_RAT]	49.88	7.09	1	1	1	1	0.999993	1		1.5116	1		1.55516	1		0.903726	1		1.0588	1		1.24577	1		0.952074	1		127	14.4324	9.59814
	A2	Sequence	# PSMs	# Proteins	# Protein Groups	Protein Group Accessions	Modifications	ΔCn	(115+116)/(113+114)	(115+116)/(113+114) Count	(115+116)/(113+114) Variability [%]	(117+118)/(113+114)	(117+118)/(113+114) Count	(117+118)/(113+114) Variability [%]	(119+121)/(113+114)	(119+121)/(113+114) Count	(119+121)/(113+114) Variability [%]	114/113	114/113 Count	114/113 Variability [%]	115/116	115/116 Count	115/116 Variability [%]	117/118	117/118 Count	117/118 Variability [%]	119/121	119/121 Count	119/121 Variability [%]	IonScore	Exp Value	Charge	MH+ [Da]	ΔM [ppm]	RT [min]	# Missed Cleavages
	High	dDNMFQIGk	1	1	1	Q63396	N-Term(iTRAQ8plex); K9(iTRAQ8plex)	0	0.999993	1		1.5116	1		1.55516	1		0.903726	1		1.0588	1		1.24577	1		0.952074	1		49.88	4.06066e-05	2	1675.89	-2.28376	14.5038	0
P36972	Adenine phosphoribosyltransferase OS=Rattus norvegicus GN=Aprt PE=1 SV=1 - [APT_RAT]	295.684	36.11	1	5	5	10	1.0406	10	12.0107	1.23499	10	21.4033	0.943521	10	14.8182	0.980039	9	6.85638	0.996659	9	9.29717	1.11475	10	23.8988	0.862232	10	17.0557	180	19.5334	6.56592
	A2	Sequence	# PSMs	# Proteins	# Protein Groups	Protein Group Accessions	Modifications	ΔCn	(115+116)/(113+114)	(115+116)/(113+114) Count	(115+116)/(113+114) Variability [%]	(117+118)/(113+114)	(117+118)/(113+114) Count	(117+118)/(113+114) Variability [%]	(119+121)/(113+114)	(119+121)/(113+114) Count	(119+121)/(113+114) Variability [%]	114/113	114/113 Count	114/113 Variability [%]	115/116	115/116 Count	115/116 Variability [%]	117/118	117/118 Count	117/118 Variability [%]	119/121	119/121 Count	119/121 Variability [%]	IonScore	Exp Value	Charge	MH+ [Da]	ΔM [ppm]	RT [min]	# Missed Cleavages
	High	gFLFGPSLAQELGVGcVLIR	2	1	1	P36972	N-Term(iTRAQ8plex); C16(Carbamidomethyl)	0	1.133	2	0.918169	1.11342	2	13.6596	0.828072	2	8.44787	1.21342	2	25.2079	0.915823	2	0.828028	1.02214	2	13.0583	0.761741	2	1.008	68.86	1.37168e-06	2	2437.36	2.49284	5.65108	0
	High	aEVVEcVSLVELTSLk	2	1	1	P36972	N-Term(iTRAQ8plex); C6(Carbamidomethyl); K16(iTRAQ8plex)	0	1.13419	2	104.632	2.74219	2	66.8636	1.68503	2	75.8609	0.864573	1		1.27817	1		0.774529	2	14.3695	0.971061	2	37.0408	55.16	2.78882e-05	3	2384.34	-6.30209	21.1622	0
	High	iDYIAGLDSR	3	1	1	P36972	N-Term(iTRAQ8plex)	0	0.963051	3	4.29091	1.13344	3	7.47079	0.769849	3	11.335	0.966791	3	2.01798	0.996659	3	2.2668	1.14904	3	4.63753	0.893676	3	8.09648	48.9	3.67151e-05	2	1426.78	-2.06873	14.9025	0
	High	sFPDFPIPGVLFR	1	1	1	P36972	N-Term(iTRAQ8plex)	0	1.06851	1		1.11299	1		0.94131	1		0.948748	1		0.922749	1		1.03182	1		0.831893	1		36.23	0.00120307	2	1795.99	-6.10092	8.62082	0
	High	dPDSFR	2	1	1	P36972	N-Term(iTRAQ8plex)	0	1.0702	2	8.09597	1.51031	2	7.7027	0.982441	2	4.32309	1.05917	2	11.4208	1.04301	2	1.30504	1.30682	2	2.11978	0.97854	2	2.25769	21.44	0.0111258	2	1040.53	-2.3671	15.3847	0
Q920P6	Adenosine deaminase OS=Rattus norvegicus GN=Ada PE=2 SV=3 - [ADA_RAT]	30.65	3.69	1	1	1	1	1.07823	1		1.35406	1		1.08822	1		1.31324	1		0.879694	1		1.53937	1		0.857638	1		352	39.8741	5.50342
	A2	Sequence	# PSMs	# Proteins	# Protein Groups	Protein Group Accessions	Modifications	ΔCn	(115+116)/(113+114)	(115+116)/(113+114) Count	(115+116)/(113+114) Variability [%]	(117+118)/(113+114)	(117+118)/(113+114) Count	(117+118)/(113+114) Variability [%]	(119+121)/(113+114)	(119+121)/(113+114) Count	(119+121)/(113+114) Variability [%]	114/113	114/113 Count	114/113 Variability [%]	115/116	115/116 Count	115/116 Variability [%]	117/118	117/118 Count	117/118 Variability [%]	119/121	119/121 Count	119/121 Variability [%]	IonScore	Exp Value	Charge	MH+ [Da]	ΔM [ppm]	RT [min]	# Missed Cleavages
	High	gIDLPADTVEGLR	1	1	1	Q920P6	N-Term(iTRAQ8plex)	0	1.07823	1		1.35406	1		1.08822	1		1.31324	1		0.879694	1		1.53937	1		0.857638	1		30.65	0.00477852	2	1659.92	0.638543	24.1249	0
Q64640	Adenosine kinase OS=Rattus norvegicus GN=Adk PE=1 SV=3 - [ADK_RAT]	28.68	1.94	1	1	1	1	0.786802	1		0.96366	1		1.04545	1		1.06949	1		0.936182	1		1.12108	1		0.876255	1		361	40.1083	6.03662
	A2	Sequence	# PSMs	# Proteins	# Protein Groups	Protein Group Accessions	Modifications	ΔCn	(115+116)/(113+114)	(115+116)/(113+114) Count	(115+116)/(113+114) Variability [%]	(117+118)/(113+114)	(117+118)/(113+114) Count	(117+118)/(113+114) Variability [%]	(119+121)/(113+114)	(119+121)/(113+114) Count	(119+121)/(113+114) Variability [%]	114/113	114/113 Count	114/113 Variability [%]	115/116	115/116 Count	115/116 Variability [%]	117/118	117/118 Count	117/118 Variability [%]	119/121	119/121 Count	119/121 Variability [%]	IonScore	Exp Value	Charge	MH+ [Da]	ΔM [ppm]	RT [min]	# Missed Cleavages
	High	eQGFETk	1	1	1	Q64640	N-Term(iTRAQ8plex); K7(iTRAQ8plex)	0	0.786802	1		0.96366	1		1.04545	1		1.06949	1		0.936182	1		1.12108	1		0.876255	1		28.68	0.00704698	2	1446.79	-9.21335	8.88591	0
P10760	Adenosylhomocysteinase OS=Rattus norvegicus GN=Ahcy PE=1 SV=3 - [SAHH_RAT]	151.313	6.71	1	2	2	9	0.991553	9	9.30316	1.02941	9	15.6173	1.4231	9	11.1679	0.879823	9	14.0951	0.978481	9	7.26263	1.06604	9	20.1333	0.904343	9	6.9413	432	47.5072	6.53662
	A2	Sequence	# PSMs	# Proteins	# Protein Groups	Protein Group Accessions	Modifications	ΔCn	(115+116)/(113+114)	(115+116)/(113+114) Count	(115+116)/(113+114) Variability [%]	(117+118)/(113+114)	(117+118)/(113+114) Count	(117+118)/(113+114) Variability [%]	(119+121)/(113+114)	(119+121)/(113+114) Count	(119+121)/(113+114) Variability [%]	114/113	114/113 Count	114/113 Variability [%]	115/116	115/116 Count	115/116 Variability [%]	117/118	117/118 Count	117/118 Variability [%]	119/121	119/121 Count	119/121 Variability [%]	IonScore	Exp Value	Charge	MH+ [Da]	ΔM [ppm]	RT [min]	# Missed Cleavages
	High	dGPLNMILDDGGDLTNLIHTk	2	1	1	P10760	N-Term(iTRAQ8plex); K21(iTRAQ8plex)	0	0.922272	2	14.8542	1.35153	2	40.3644	1.70085	2	16.3439	0.669305	2	15.2417	1.24916	2	56.0617	1.41676	2	33.8372	1.04601	2	35.4398	64.66	3.86437e-06	3	2860.51	-7.06918	12.8461	0
	High	iILLAEGR	7	1	1	P10760	N-Term(iTRAQ8plex)	0	0.991553	7	9.30316	0.990015	7	9.76057	1.33597	7	9.38845	0.947308	7	12.0356	0.978481	7	4.25857	0.93193	7	2.18309	0.904343	7	5.70027	26.24	0.00237121	2	1188.77	4.18916	0.347492	0
Q9WUS0	Adenylate kinase isoenzyme 4, mitochondrial OS=Rattus norvegicus GN=Ak3l1 PE=2 SV=1 - [KAD4_RAT]	26.5	4.48	1	1	1	1	0.924748	1		0.928297	1		1.12551	1		0.959081	1		1.02568	1		0.886864	1		1.00404	1		223	25.1873	8.01611
	A2	Sequence	# PSMs	# Proteins	# Protein Groups	Protein Group Accessions	Modifications	ΔCn	(115+116)/(113+114)	(115+116)/(113+114) Count	(115+116)/(113+114) Variability [%]	(117+118)/(113+114)	(117+118)/(113+114) Count	(117+118)/(113+114) Variability [%]	(119+121)/(113+114)	(119+121)/(113+114) Count	(119+121)/(113+114) Variability [%]	114/113	114/113 Count	114/113 Variability [%]	115/116	115/116 Count	115/116 Variability [%]	117/118	117/118 Count	117/118 Variability [%]	119/121	119/121 Count	119/121 Variability [%]	IonScore	Exp Value	Charge	MH+ [Da]	ΔM [ppm]	RT [min]	# Missed Cleavages
	High	tLVQAEALDR	1	1	1	Q9WUS0	N-Term(iTRAQ8plex)	0	0.924748	1		0.928297	1		1.12551	1		0.959081	1		1.02568	1		0.886864	1		1.00404	1		26.5	0.0109697	2	1419.82	7.84449	12.127	0
Q05962	ADP/ATP translocase 1 OS=Rattus norvegicus GN=Slc25a4 PE=1 SV=3 - [ADT1_RAT]	330.356	11.07	1	3	3	13	1.06289	13	9.03041	1.03378	13	11.2001	1.23089	13	5.39572	0.953029	12	7.49141	1.01105	12	12.5862	1.16553	12	11.5664	0.978377	13	9.51803	298	32.9682	9.78857
	A2	Sequence	# PSMs	# Proteins	# Protein Groups	Protein Group Accessions	Modifications	ΔCn	(115+116)/(113+114)	(115+116)/(113+114) Count	(115+116)/(113+114) Variability [%]	(117+118)/(113+114)	(117+118)/(113+114) Count	(117+118)/(113+114) Variability [%]	(119+121)/(113+114)	(119+121)/(113+114) Count	(119+121)/(113+114) Variability [%]	114/113	114/113 Count	114/113 Variability [%]	115/116	115/116 Count	115/116 Variability [%]	117/118	117/118 Count	117/118 Variability [%]	119/121	119/121 Count	119/121 Variability [%]	IonScore	Exp Value	Charge	MH+ [Da]	ΔM [ppm]	RT [min]	# Missed Cleavages
	High	eFnGLGDcLTk	9	1	1	Q05962	N-Term(iTRAQ8plex); N3(Deamidated); C8(Carbamidomethyl); K11(iTRAQ8plex)	0	1.05514	9	6.83421	1.03355	9	11.2336	1.24479	9	5.20961	0.961973	8	5.43072	0.970037	8	7.7728	1.15046	8	8.00218	1.01129	9	10.8795	54.02	2.23897e-05	3	1862.97	-3.95506	17.8033	0
	High	eFNGLGDcLTk	2	1	1	Q05962	N-Term(iTRAQ8plex); C8(Carbamidomethyl); K11(iTRAQ8plex)	0	1.17506	2	5.86796	1.24661	2	1.2872	1.24499	2	1.68882	0.5727	2	99.7735	1.32169	2	20.1121	1.11796	2	21.7724	0.860182	2	19.2637	50.44	5.55744e-05	3	1861.99	0.176949	18.9918	0
	High	dFLAGGIAAAVSk	1	1	1	Q05962	N-Term(iTRAQ8plex); K13(iTRAQ8plex)	0	0.766033	1		1.02046	1		0.994052	1		0.929324	1		0.709434	1		1.33119	1		1.19201	1		31.44	0.00538346	3	1828.07	-6.25431	12.0568	0
	High	eQGFLSFWR	1	1	1	Q05962	N-Term(iTRAQ8plex)	0	1.06768	1		1.03378	1		1.10174	1		0.856099	1		1.08034	1		1.19415	1		0.951839	1		31.3	0.00244632	2	1473.77	-8.86872	4.33758	0
P61206	ADP-ribosylation factor 3 OS=Rattus norvegicus GN=Arf3 PE=2 SV=2 - [ARF3_RAT]	222.466	29.83	3	2	4	10	1.26298	7	2.94874	1.44759	7	4.00813	1.29016	7	9.77829	1.20553	7	12.5606	0.995402	7	12.5174	1.11587	7	2.92904	1.03879	7	10.3741	181	20.5877	7.43018
	A2	Sequence	# PSMs	# Proteins	# Protein Groups	Protein Group Accessions	Modifications	ΔCn	(115+116)/(113+114)	(115+116)/(113+114) Count	(115+116)/(113+114) Variability [%]	(117+118)/(113+114)	(117+118)/(113+114) Count	(117+118)/(113+114) Variability [%]	(119+121)/(113+114)	(119+121)/(113+114) Count	(119+121)/(113+114) Variability [%]	114/113	114/113 Count	114/113 Variability [%]	115/116	115/116 Count	115/116 Variability [%]	117/118	117/118 Count	117/118 Variability [%]	119/121	119/121 Count	119/121 Variability [%]	IonScore	Exp Value	Charge	MH+ [Da]	ΔM [ppm]	RT [min]	# Missed Cleavages
	High	nISFTVWDVGGQDk	1	3	1	P61206	N-Term(iTRAQ8plex); K14(iTRAQ8plex)	0	1.34318	1		1.72801	1		1.20801	1		0.545545	1		1.26907	1		1.09405	1		0.809363	1		84.91	2.5828e-08	2	2174.16	-5.29046	10.8555	0
	High	lGEIVTTIPTIGFNVETVEYk	2	5	3	P61206;P84083;P61751	N-Term(iTRAQ8plex); K21(iTRAQ8plex)	0																						58.44	1.51812e-05	3	2931.64	-6.2897	11.1733	0
	High	iLMVGLDAAGk	1	5	3	P61206;P84083;P61751	N-Term(iTRAQ8plex); K11(iTRAQ8plex)	0																						38.07	0.00097472	2	1696.04	5.4363	6.22752	0
	High	mLAEDELR	4	3	1	P61206	N-Term(iTRAQ8plex)	0	1.26667	4	2.29941	1.44129	4	0.719955	1.33347	4	4.89696	1.22253	4	4.09749	1.03815	4	10.7666	1.1914	4	10.7935	1.05342	4	4.78938	37.29	0.000494591	2	1280.68	-0.614686	21.8291	0
	High	mLAEDELR	2	3	1	P61206	N-Term(iTRAQ8plex); M1(Oxidation)	0	1.20456	2	7.03024	1.08907	2	48.7756	1.14384	2	17.9902	1.05211	2	33.6002	0.894916	2	8.44224	1.15942	2	8.55176	1.03231	2	11.3103	27.94	0.00514221	2	1296.67	-2.71056	17.8485	0
P61751	ADP-ribosylation factor 4 OS=Rattus norvegicus GN=Arf4 PE=2 SV=2 - [ARF4_RAT]	107.071	23.33	1	1	3	4	1.36881	1		1.44015	1		1.20622	1		0.909837	1		1.13272	1		1.01808	1		0.937727	1		180	20.3836	7.13721
	A2	Sequence	# PSMs	# Proteins	# Protein Groups	Protein Group Accessions	Modifications	ΔCn	(115+116)/(113+114)	(115+116)/(113+114) Count	(115+116)/(113+114) Variability [%]	(117+118)/(113+114)	(117+118)/(113+114) Count	(117+118)/(113+114) Variability [%]	(119+121)/(113+114)	(119+121)/(113+114) Count	(119+121)/(113+114) Variability [%]	114/113	114/113 Count	114/113 Variability [%]	115/116	115/116 Count	115/116 Variability [%]	117/118	117/118 Count	117/118 Variability [%]	119/121	119/121 Count	119/121 Variability [%]	IonScore	Exp Value	Charge	MH+ [Da]	ΔM [ppm]	RT [min]	# Missed Cleavages
	High	lGEIVTTIPTIGFNVETVEYk	2	5	3	P61206;P84083;P61751	N-Term(iTRAQ8plex); K21(iTRAQ8plex)	0																						58.44	1.51812e-05	3	2931.64	-6.2897	11.1733	0
	High	iQEGAAVLQk	1	1	1	P61751	N-Term(iTRAQ8plex); K10(iTRAQ8plex)	0	1.36881	1		1.44015	1		1.20622	1		0.909837	1		1.13272	1		1.01808	1		0.937727	1		43.83	0.00022356	2	1665.01	-2.35255	12.1938	0
	High	iLMVGLDAAGk	1	5	3	P61206;P84083;P61751	N-Term(iTRAQ8plex); K11(iTRAQ8plex)	0																						38.07	0.00097472	2	1696.04	5.4363	6.22752	0
P84083	ADP-ribosylation factor 5 OS=Rattus norvegicus GN=Arf5 PE=1 SV=2 - [ARF5_RAT]	151.389	27.78	1	2	4	6	1.34447	3	0.55101	1.52774	3	2.52044	1.02979	3	3.72915	0.946491	3	14.9844	1.00722	3	15.2242	1.05721	3	1.49125	0.957952	3	0.443762	180	20.5166	6.78564
	A2	Sequence	# PSMs	# Proteins	# Protein Groups	Protein Group Accessions	Modifications	ΔCn	(115+116)/(113+114)	(115+116)/(113+114) Count	(115+116)/(113+114) Variability [%]	(117+118)/(113+114)	(117+118)/(113+114) Count	(117+118)/(113+114) Variability [%]	(119+121)/(113+114)	(119+121)/(113+114) Count	(119+121)/(113+114) Variability [%]	114/113	114/113 Count	114/113 Variability [%]	115/116	115/116 Count	115/116 Variability [%]	117/118	117/118 Count	117/118 Variability [%]	119/121	119/121 Count	119/121 Variability [%]	IonScore	Exp Value	Charge	MH+ [Da]	ΔM [ppm]	RT [min]	# Missed Cleavages
	High	lGEIVTTIPTIGFNVETVEYk	2	5	3	P61206;P84083;P61751	N-Term(iTRAQ8plex); K21(iTRAQ8plex)	0																						58.44	1.51812e-05	3	2931.64	-6.2897	11.1733	0
	High	vQESADELQk	1	1	1	P84083	N-Term(iTRAQ8plex); K10(iTRAQ8plex)	0	1.20286	1		1.31037	1		1.00422	1		0.855986	1		0.909458	1		1.05721	1		0.899295	1		57.86	9.90274e-06	2	1754.96	-9.98573	13.5054	0
	High	iLMVGLDAAGk	1	5	3	P61206;P84083;P61751	N-Term(iTRAQ8plex); K11(iTRAQ8plex)	0																						38.07	0.00097472	2	1696.04	5.4363	6.22752	0
	High	mLQEDELR	2	1	1	P84083	N-Term(iTRAQ8plex)	0	1.34697	2	0.275503	1.54078	2	1.26007	1.05347	2	3.37109	1.00683	2	9.18123	1.06859	2	8.78693	1.11465	2	9.35622	0.959387	2	0.22188	36.2	0.000611702	2	1337.72	9.10254	15.5162	0
Q3MID3	ADP-ribosylation factor GTPase-activating protein 2 OS=Rattus norvegicus GN=Arfgap2 PE=2 SV=1 - [ARFG2_RAT]	54.11	1.73	1	1	1	2	1.03948	2	0.865864	0.757933	2	1.30503	0.836439	2	2.42201	0.966433	2	4.00042	0.93121	2	3.59172	1.06379	2	3.09305	0.888956	2	3.72006	520	56.5212	7.97217
	A2	Sequence	# PSMs	# Proteins	# Protein Groups	Protein Group Accessions	Modifications	ΔCn	(115+116)/(113+114)	(115+116)/(113+114) Count	(115+116)/(113+114) Variability [%]	(117+118)/(113+114)	(117+118)/(113+114) Count	(117+118)/(113+114) Variability [%]	(119+121)/(113+114)	(119+121)/(113+114) Count	(119+121)/(113+114) Variability [%]	114/113	114/113 Count	114/113 Variability [%]	115/116	115/116 Count	115/116 Variability [%]	117/118	117/118 Count	117/118 Variability [%]	119/121	119/121 Count	119/121 Variability [%]	IonScore	Exp Value	Charge	MH+ [Da]	ΔM [ppm]	RT [min]	# Missed Cleavages
	High	eVDSEYEAR	2	1	1	Q3MID3	N-Term(iTRAQ8plex)	0	1.03948	2	0.865864	0.757933	2	1.30503	0.836439	2	2.42201	0.966433	2	4.00042	0.93121	2	3.59172	1.06379	2	3.09305	0.888956	2	3.72006	33.93	0.000403618	2	1401.68	-1.5548	13.9366	0
P37996	ADP-ribosylation factor-like protein 3 OS=Rattus norvegicus GN=Arl3 PE=1 SV=2 - [ARL3_RAT]	68.5705	4.4	1	1	1	3	0.947929	3	1.40815	0.97422	3	3.63483	0.622507	3	5.31503	0.901482	3	8.81429	1.15029	3	2.46219	1.15007	3	5.23899	0.864338	3	3.57144	182	20.4438	7.23975
	A2	Sequence	# PSMs	# Proteins	# Protein Groups	Protein Group Accessions	Modifications	ΔCn	(115+116)/(113+114)	(115+116)/(113+114) Count	(115+116)/(113+114) Variability [%]	(117+118)/(113+114)	(117+118)/(113+114) Count	(117+118)/(113+114) Variability [%]	(119+121)/(113+114)	(119+121)/(113+114) Count	(119+121)/(113+114) Variability [%]	114/113	114/113 Count	114/113 Variability [%]	115/116	115/116 Count	115/116 Variability [%]	117/118	117/118 Count	117/118 Variability [%]	119/121	119/121 Count	119/121 Variability [%]	IonScore	Exp Value	Charge	MH+ [Da]	ΔM [ppm]	RT [min]	# Missed Cleavages
	High	sAPDQEVR	3	1	1	P37996	N-Term(iTRAQ8plex)	0	0.947929	3	1.40815	0.97422	3	3.63483	0.622507	3	5.31503	0.901482	3	8.81429	1.15029	3	2.46219	1.15007	3	5.23899	0.864338	3	3.57144	34.17	0.000650802	2	1205.64	-0.238584	6.61416	0
Q66HA6	ADP-ribosylation factor-like protein 8B OS=Rattus norvegicus GN=Arl8b PE=2 SV=1 - [ARL8B_RAT]	103.823	4.84	1	1	1	4	1.40411	4	1.81629	2.16338	4	9.50183	2.3934	4	2.73466	0.944856	4	7.78485	1.09307	4	14.5426	1.11077	4	4.86395	0.890523	4	5.40909	186	21.5251	8.42627
	A2	Sequence	# PSMs	# Proteins	# Protein Groups	Protein Group Accessions	Modifications	ΔCn	(115+116)/(113+114)	(115+116)/(113+114) Count	(115+116)/(113+114) Variability [%]	(117+118)/(113+114)	(117+118)/(113+114) Count	(117+118)/(113+114) Variability [%]	(119+121)/(113+114)	(119+121)/(113+114) Count	(119+121)/(113+114) Variability [%]	114/113	114/113 Count	114/113 Variability [%]	115/116	115/116 Count	115/116 Variability [%]	117/118	117/118 Count	117/118 Variability [%]	119/121	119/121 Count	119/121 Variability [%]	IonScore	Exp Value	Charge	MH+ [Da]	ΔM [ppm]	RT [min]	# Missed Cleavages
	High	dLPNALDEk	4	1	1	Q66HA6	N-Term(iTRAQ8plex); K9(iTRAQ8plex)	0	1.40411	4	1.81629	2.16338	4	9.50183	2.3934	4	2.73466	0.944856	4	7.78485	1.09307	4	14.5426	1.11077	4	4.86395	0.890523	4	5.40909	47.82	8.25981e-05	2	1622.93	4.63551	15.9546	0
Q6AY63	ADP-sugar pyrophosphatase OS=Rattus norvegicus GN=Nudt5 PE=2 SV=1 - [NUDT5_RAT]	62.645	4.11	1	1	1	2	0.896144	2	11.8446	0.776305	2	9.16694	0.831172	2	10.881	0.955979	2	24.3526	0.932752	2	17.8732	1.07204	2	1.13235	0.872394	2	4.68504	219	24.1022	5.16064
	A2	Sequence	# PSMs	# Proteins	# Protein Groups	Protein Group Accessions	Modifications	ΔCn	(115+116)/(113+114)	(115+116)/(113+114) Count	(115+116)/(113+114) Variability [%]	(117+118)/(113+114)	(117+118)/(113+114) Count	(117+118)/(113+114) Variability [%]	(119+121)/(113+114)	(119+121)/(113+114) Count	(119+121)/(113+114) Variability [%]	114/113	114/113 Count	114/113 Variability [%]	115/116	115/116 Count	115/116 Variability [%]	117/118	117/118 Count	117/118 Variability [%]	119/121	119/121 Count	119/121 Variability [%]	IonScore	Exp Value	Charge	MH+ [Da]	ΔM [ppm]	RT [min]	# Missed Cleavages
	High	lDALGAEDR	2	1	1	Q6AY63	N-Term(iTRAQ8plex)	0	0.896144	2	11.8446	0.776305	2	9.16694	0.831172	2	10.881	0.955979	2	24.3526	0.932752	2	17.8732	1.07204	2	1.13235	0.872394	2	4.68504	41.96	0.000273822	2	1263.68	-0.428644	15.9005	0
Q63014	A-kinase anchor protein 8 OS=Rattus norvegicus GN=Akap8 PE=2 SV=1 - [AKAP8_RAT]	45.99	1.31	1	1	1	1	0.835693	1		0.597558	1		0.730054	1		0.784905	1		1.34884	1		1.00605	1		0.863278	1		687	76.1143	5.13525
	A2	Sequence	# PSMs	# Proteins	# Protein Groups	Protein Group Accessions	Modifications	ΔCn	(115+116)/(113+114)	(115+116)/(113+114) Count	(115+116)/(113+114) Variability [%]	(117+118)/(113+114)	(117+118)/(113+114) Count	(117+118)/(113+114) Variability [%]	(119+121)/(113+114)	(119+121)/(113+114) Count	(119+121)/(113+114) Variability [%]	114/113	114/113 Count	114/113 Variability [%]	115/116	115/116 Count	115/116 Variability [%]	117/118	117/118 Count	117/118 Variability [%]	119/121	119/121 Count	119/121 Variability [%]	IonScore	Exp Value	Charge	MH+ [Da]	ΔM [ppm]	RT [min]	# Missed Cleavages
	High	sFEDEEIQk	1	1	1	Q63014	N-Term(iTRAQ8plex); K9(iTRAQ8plex)	0	0.835693	1		0.597558	1		0.730054	1		0.784905	1		1.34884	1		1.00605	1		0.863278	1		45.99	9.69306e-05	2	1732.91	-7.78852	13.2049	0
Q5XI97	Alanyl-tRNA synthetase domain-containing protein 1 OS=Rattus norvegicus GN=Aarsd1 PE=2 SV=1 - [AASD1_RAT]	33.26	3.16	1	1	1	1	1.1995	1		0.890089	1		0.742455	1		0.985084	1		1.34369	1		0.989737	1		1.23206	1		412	45.0652	6.48096
	A2	Sequence	# PSMs	# Proteins	# Protein Groups	Protein Group Accessions	Modifications	ΔCn	(115+116)/(113+114)	(115+116)/(113+114) Count	(115+116)/(113+114) Variability [%]	(117+118)/(113+114)	(117+118)/(113+114) Count	(117+118)/(113+114) Variability [%]	(119+121)/(113+114)	(119+121)/(113+114) Count	(119+121)/(113+114) Variability [%]	114/113	114/113 Count	114/113 Variability [%]	115/116	115/116 Count	115/116 Variability [%]	117/118	117/118 Count	117/118 Variability [%]	119/121	119/121 Count	119/121 Variability [%]	IonScore	Exp Value	Charge	MH+ [Da]	ΔM [ppm]	RT [min]	# Missed Cleavages
	High	eLSLDDPEVEQVR	1	1	1	Q5XI97	N-Term(iTRAQ8plex)	0	1.1995	1		0.890089	1		0.742455	1		0.985084	1		1.34369	1		0.989737	1		1.23206	1		33.26	0.00252554	2	1832.95	0.00654783	18.4506	0
P50475	Alanyl-tRNA synthetase, cytoplasmic OS=Rattus norvegicus GN=Aars PE=1 SV=3 - [SYAC_RAT]	178.004	3.2	1	3	3	8	0.812479	8	7.12085	0.85514	8	10.2646	0.763734	8	5.74931	1.06759	8	6.78246	0.930411	8	8.34914	1.06875	8	8.59181	0.816863	8	5.16269	968	106.723	5.61768
	A2	Sequence	# PSMs	# Proteins	# Protein Groups	Protein Group Accessions	Modifications	ΔCn	(115+116)/(113+114)	(115+116)/(113+114) Count	(115+116)/(113+114) Variability [%]	(117+118)/(113+114)	(117+118)/(113+114) Count	(117+118)/(113+114) Variability [%]	(119+121)/(113+114)	(119+121)/(113+114) Count	(119+121)/(113+114) Variability [%]	114/113	114/113 Count	114/113 Variability [%]	115/116	115/116 Count	115/116 Variability [%]	117/118	117/118 Count	117/118 Variability [%]	119/121	119/121 Count	119/121 Variability [%]	IonScore	Exp Value	Charge	MH+ [Da]	ΔM [ppm]	RT [min]	# Missed Cleavages
	High	aVFDETYPDPVR	5	1	1	P50475	N-Term(iTRAQ8plex)	0	0.794362	5	2.41435	0.860089	5	2.64017	0.763946	5	1.386	1.09407	5	7.274	0.927779	5	3.08744	1.06992	5	2.82395	0.815073	5	4.40868	48.94	4.40371e-05	2	1712.88	0.7518	22.216	0
	High	qIWQNLGLDEAk	1	1	1	P50475	N-Term(iTRAQ8plex); K12(iTRAQ8plex)	0	0.910747	1		0.965096	1		0.806782	1		0.85532	1		0.45605	1		0.602777	1		0.527349	1		34.85	0.00247142	3	2023.14	-1.90439	9.19985	0
	High	lFIDEPR	2	1	1	P50475	N-Term(iTRAQ8plex)	0	0.862267	2	7.65309	0.734055	2	1.77156	0.666183	2	1.93379	1.06138	2	9.06453	1.06203	2	2.92883	1.05828	2	11.4526	0.923274	2	17.9725	28.56	0.00654784	2	1193.68	-2.39247	12.0095	0
P11884	Aldehyde dehydrogenase, mitochondrial OS=Rattus norvegicus GN=Aldh2 PE=1 SV=1 - [ALDH2_RAT]	182.288	6.55	1	3	3	4	0.983533	3	1.24274	1.21185	4	17.4979	1.60964	4	10.0586	0.930637	4	8.76909	0.988189	3	2.43889	0.991837	3	2.80187	0.988968	4	6.69852	519	56.4527	7.04932
	A2	Sequence	# PSMs	# Proteins	# Protein Groups	Protein Group Accessions	Modifications	ΔCn	(115+116)/(113+114)	(115+116)/(113+114) Count	(115+116)/(113+114) Variability [%]	(117+118)/(113+114)	(117+118)/(113+114) Count	(117+118)/(113+114) Variability [%]	(119+121)/(113+114)	(119+121)/(113+114) Count	(119+121)/(113+114) Variability [%]	114/113	114/113 Count	114/113 Variability [%]	115/116	115/116 Count	115/116 Variability [%]	117/118	117/118 Count	117/118 Variability [%]	119/121	119/121 Count	119/121 Variability [%]	IonScore	Exp Value	Charge	MH+ [Da]	ΔM [ppm]	RT [min]	# Missed Cleavages
	High	tFVQEDVYDEFVER	2	1	1	P11884	N-Term(iTRAQ8plex)	0	0.983533	1		1.00565	2	33.8053	1.60964	2	4.26685	1.1691	2	33.1485	0.913671	1		0.991837	1		1.2067	2	25.2701	74.73	8.07628e-08	2	2080.02	0.667911	22.9548	0
	High	tEQGPQVDETQFk	1	1	1	P11884	N-Term(iTRAQ8plex); K13(iTRAQ8plex)	0	0.940959	1		1.47855	1		1.79068	1		0.835594	1		0.988189	1		0.973272	1		0.958614	1		67.19	9.83574e-07	2	2115.1	-9.18398	14.1332	0
	High	lADLIER	1	1	1	P11884	N-Term(iTRAQ8plex)	0	0.991812	1		1.16976	1		1.36301	1		0.921063	1		1.00458	1		1.10398	1		0.932225	1		34.9	0.00171505	2	1133.68	0.388158	16.2503	0
P07943	Aldose reductase OS=Rattus norvegicus GN=Akr1b1 PE=1 SV=3 - [ALDR_RAT]	191.69	13.29	1	4	4	9	1.74655	9	28.3579	1.65461	9	25.5986	1.33182	9	11.3973	0.920764	9	12.5179	1.06042	9	14.8253	1.21389	9	8.00345	1.05973	9	14.8442	316	35.7743	6.7124
	A2	Sequence	# PSMs	# Proteins	# Protein Groups	Protein Group Accessions	Modifications	ΔCn	(115+116)/(113+114)	(115+116)/(113+114) Count	(115+116)/(113+114) Variability [%]	(117+118)/(113+114)	(117+118)/(113+114) Count	(117+118)/(113+114) Variability [%]	(119+121)/(113+114)	(119+121)/(113+114) Count	(119+121)/(113+114) Variability [%]	114/113	114/113 Count	114/113 Variability [%]	115/116	115/116 Count	115/116 Variability [%]	117/118	117/118 Count	117/118 Variability [%]	119/121	119/121 Count	119/121 Variability [%]	IonScore	Exp Value	Charge	MH+ [Da]	ΔM [ppm]	RT [min]	# Missed Cleavages
	High	aIGVSNFNPLQIER	3	1	1	P07943	N-Term(iTRAQ8plex)	0	1.77015	3	26.2581	1.46132	3	29.2214	1.20209	3	12.3232	1.00155	3	14.2163	0.99977	3	6.8892	1.19346	3	2.51697	0.959291	3	30.7572	58.39	1.03587e-05	2	1862.04	-1.47047	8.94636	0
	High	eVGVALQEk	4	1	1	P07943	N-Term(iTRAQ8plex); K9(iTRAQ8plex)	0	1.6818	4	11.7786	1.80134	4	14.118	1.33693	4	5.51274	0.890744	4	6.155	1.06915	4	7.38244	1.19701	4	10.8801	1.01445	4	16.091	43.77	0.000316918	3	1580.95	3.16586	10.8092	0
	High	sPPGQVTEAVk	1	1	1	P07943	N-Term(iTRAQ8plex); K11(iTRAQ8plex)	0	0.916016	1		1.01777	1		0.742345	1		0.398795	1		1.09023	1		1.28044	1		1.05973	1		32.4	0.00322246	2	1720.99	-7.0771	10.1594	0
	High	dYPFHAEV	1	1	1	P07943	N-Term(iTRAQ8plex)	0	2.18775	1		1.83754	1		1.39189	1		1.12011	1		0.895449	1		1.2961	1		1.07517	1		22.15	0.0103621	2	1281.64	-2.52487	17.0184	0
Q99068	Alpha-2-macroglobulin receptor-associated protein OS=Rattus norvegicus GN=Lrpap1 PE=1 SV=2 - [AMRP_RAT]	35.32	1.94	1	1	1	2	1.48474	2	2.68069	1.32069	2	4.0213	1.23467	2	2.79893	1.09628	2	3.89705	0.843894	2	9.44135	1.01988	2	4.32892	1.0288	2	3.83081	360	42.0061	7.37158
	A2	Sequence	# PSMs	# Proteins	# Protein Groups	Protein Group Accessions	Modifications	ΔCn	(115+116)/(113+114)	(115+116)/(113+114) Count	(115+116)/(113+114) Variability [%]	(117+118)/(113+114)	(117+118)/(113+114) Count	(117+118)/(113+114) Variability [%]	(119+121)/(113+114)	(119+121)/(113+114) Count	(119+121)/(113+114) Variability [%]	114/113	114/113 Count	114/113 Variability [%]	115/116	115/116 Count	115/116 Variability [%]	117/118	117/118 Count	117/118 Variability [%]	119/121	119/121 Count	119/121 Variability [%]	IonScore	Exp Value	Charge	MH+ [Da]	ΔM [ppm]	RT [min]	# Missed Cleavages
	High	eSGEEFR	2	1	1	Q99068	N-Term(iTRAQ8plex)	0	1.48474	2	2.68069	1.32069	2	4.0213	1.23467	2	2.79893	1.09628	2	3.89705	0.843894	2	9.44135	1.01988	2	4.32892	1.0288	2	3.83081	27.28	0.00187068	2	1157.57	-3.81284	14.628	0
Q9Z1P2	Alpha-actinin-1 OS=Rattus norvegicus GN=Actn1 PE=1 SV=1 - [ACTN1_RAT]	1126.35	17.71	1	6	13	42	1.38706	10	16.0934	1.31992	10	16.4308	1.28852	9	7.50697	1.05607	8	12.7523	1.00876	9	8.32442	1.16199	9	6.83189	0.963103	9	17.0033	892	102.896	5.37646
	A2	Sequence	# PSMs	# Proteins	# Protein Groups	Protein Group Accessions	Modifications	ΔCn	(115+116)/(113+114)	(115+116)/(113+114) Count	(115+116)/(113+114) Variability [%]	(117+118)/(113+114)	(117+118)/(113+114) Count	(117+118)/(113+114) Variability [%]	(119+121)/(113+114)	(119+121)/(113+114) Count	(119+121)/(113+114) Variability [%]	114/113	114/113 Count	114/113 Variability [%]	115/116	115/116 Count	115/116 Variability [%]	117/118	117/118 Count	117/118 Variability [%]	119/121	119/121 Count	119/121 Variability [%]	IonScore	Exp Value	Charge	MH+ [Da]	ΔM [ppm]	RT [min]	# Missed Cleavages
	High	aGTQIENIEEDFR	2	1	1	Q9Z1P2	N-Term(iTRAQ8plex)	0	1.43097	2	10.1293	1.31478	2	16.4308	1.20118	2	10.9078	1.10454	2	21.2124	0.992741	2	2.33048	1.46811	2	4.83274	0.888729	2	11.9579	87.13	6.00291e-09	2	1825.92	-2.55353	15.0372	0
	High	fAIQDISVEETSAk	3	2	2	Q9Z1P2;Q9QXQ0	N-Term(iTRAQ8plex); K14(iTRAQ8plex)	0																						75.41	2.41701e-07	2	2146.18	-3.69383	10.8137	0
	High	mVSDINNAWGcLEQAEk	2	1	1	Q9Z1P2	N-Term(iTRAQ8plex); C11(Carbamidomethyl); K17(iTRAQ8plex)	0	1.38706	2	3.45652	1.57287	2	33.8827	1.28729	2	7.6489	1.16529	2	10.1047	1.12481	2	16.2514	0.989536	2	25.3616	1.16166	2	23.6519	65.25	2.05991e-06	3	2573.3	3.4628	10.5851	0
	High	icDQWDNLGALTQk	2	1	1	Q9Z1P2	N-Term(iTRAQ8plex); C2(Carbamidomethyl); K14(iTRAQ8plex)	0	1.81323	2	61.932	1.52872	2	19.6415	1.39637	1					1.33194	1		0.638769	1		0.904172	1		59	9.12721e-06	3	2270.2	-4.57428	11.0596	0
	High	gYEEWLLNEIR	5	2	2	Q9Z1P2;Q9QXQ0	N-Term(iTRAQ8plex)	0																						56.64	9.75467e-06	3	1725.92	7.48481	9.10565	0
	High	tINEVENQILTR	5	2	2	Q9Z1P2;Q9QXQ0	N-Term(iTRAQ8plex)	0																						54.72	2.39474e-05	2	1733.97	-0.454155	11.8397	0
	High	tInEVENQILTR	6	2	2	Q9Z1P2;Q9QXQ0	N-Term(iTRAQ8plex); N3(Deamidated)	0																						53.52	2.9568e-05	2	1734.95	-1.23201	17.1779	0
	High	gISQEQMNEFR	2	1	1	Q9Z1P2	N-Term(iTRAQ8plex)	0	1.55558	2	10.7026	1.37199	2	8.06749	1.29098	2	4.86523	1.0703	2	9.10913	1.00966	2	8.45816	1.13115	2	1.43004	0.849163	2	1.78511	46.33	6.86787e-05	2	1642.83	7.57079	10.3955	0
	High	eLPPDQAEYcIAR	3	2	2	Q9Z1P2;Q9QXQ0	N-Term(iTRAQ8plex); C10(Carbamidomethyl)	0																						43.3	0.000163707	2	1865.95	8.36942	16.3335	0
	High	vGWEQLLTTIAR	6	2	2	Q9Z1P2;Q9QXQ0	N-Term(iTRAQ8plex)	0																						42.33	0.00036257	2	1690.97	-8.3643	6.19479	0
	High	lMLLLEVISGER	1	2	2	Q9Z1P2;Q9QXQ0	N-Term(iTRAQ8plex)	0																						40.7	0.000361734	2	1677	6.66323	6.53128	0
	High	lASDLLEWIR	2	2	2	Q9Z1P2;Q9QXQ0	N-Term(iTRAQ8plex)	0																						40.49	0.000558316	2	1519.88	2.94953	6.25379	0
	High	rDQALTEEHSR	1	1	1	Q9Z1P2	N-Term(iTRAQ8plex)	0	1.11259	1		1.15554	1		1.28852	1		0.904292	1		1.18423	1		1.21672	1		1.07196	1		35.46	0.000853338	2	1645.86	1.20087	6.46832	1
	High	gyEEWLLNEIR	1	2	2	Q9Z1P2;Q9QXQ0	N-Term(iTRAQ8plex); Y2(iTRAQ8plex)	0																						29.42	0.00914303	3	2030.13	6.19434	6.49088	0
	High	tIPWLEnR	1	1	1	Q9Z1P2	N-Term(iTRAQ8plex); N7(Deamidated)	0	1.14465	1		0.958007	1		0.975535	1		1.02441	1		1.00097	1		1.16199	1		1.08383	1		27.65	0.00549731	2	1333.74	-3.59233	9.93383	0
Q9QXQ0	Alpha-actinin-4 OS=Rattus norvegicus GN=Actn4 PE=1 SV=2 - [ACTN4_RAT]	912.338	14.27	1	3	11	38	1.30806	4	7.51434	1.22253	4	8.2067	1.09486	4	10.1807	1.02408	4	6.47291	0.991009	4	9.67355	1.15985	4	2.45009	0.935914	4	0.980008	911	104.849	5.43994
	A2	Sequence	# PSMs	# Proteins	# Protein Groups	Protein Group Accessions	Modifications	ΔCn	(115+116)/(113+114)	(115+116)/(113+114) Count	(115+116)/(113+114) Variability [%]	(117+118)/(113+114)	(117+118)/(113+114) Count	(117+118)/(113+114) Variability [%]	(119+121)/(113+114)	(119+121)/(113+114) Count	(119+121)/(113+114) Variability [%]	114/113	114/113 Count	114/113 Variability [%]	115/116	115/116 Count	115/116 Variability [%]	117/118	117/118 Count	117/118 Variability [%]	119/121	119/121 Count	119/121 Variability [%]	IonScore	Exp Value	Charge	MH+ [Da]	ΔM [ppm]	RT [min]	# Missed Cleavages
	High	fAIQDISVEETSAk	3	2	2	Q9Z1P2;Q9QXQ0	N-Term(iTRAQ8plex); K14(iTRAQ8plex)	0																						75.41	2.41701e-07	2	2146.18	-3.69383	10.8137	0
	High	eTTDTDTADQVIASFk	1	1	1	Q9QXQ0	N-Term(iTRAQ8plex); K16(iTRAQ8plex)	0																						63.47	3.01353e-06	3	2350.22	-2.17188	8.66424	0
	High	gYEEWLLNEIR	5	2	2	Q9Z1P2;Q9QXQ0	N-Term(iTRAQ8plex)	0																						56.64	9.75467e-06	3	1725.92	7.48481	9.10565	0
	High	tINEVENQILTR	5	2	2	Q9Z1P2;Q9QXQ0	N-Term(iTRAQ8plex)	0																						54.72	2.39474e-05	2	1733.97	-0.454155	11.8397	0
	High	tInEVENQILTR	6	2	2	Q9Z1P2;Q9QXQ0	N-Term(iTRAQ8plex); N3(Deamidated)	0																						53.52	2.9568e-05	2	1734.95	-1.23201	17.1779	0
	High	dYETATLSDIk	2	1	1	Q9QXQ0	N-Term(iTRAQ8plex); K11(iTRAQ8plex)	0	1.37596	2	1.07776	1.20186	2	12.8027	0.994849	2	26.554	0.880394	2	17.2729	0.91886	2	6.9972	1.16844	2	2.45009	0.776823	2	28.3068	49.77	6.95895e-05	2	1864.02	0.151099	14.9129	0
	High	eLPPDQAEYcIAR	3	2	2	Q9Z1P2;Q9QXQ0	N-Term(iTRAQ8plex); C10(Carbamidomethyl)	0																						43.3	0.000163707	2	1865.95	8.36942	16.3335	0
	High	vGWEQLLTTIAR	6	2	2	Q9Z1P2;Q9QXQ0	N-Term(iTRAQ8plex)	0																						42.33	0.00036257	2	1690.97	-8.3643	6.19479	0
	High	lMLLLEVISGER	1	2	2	Q9Z1P2;Q9QXQ0	N-Term(iTRAQ8plex)	0																						40.7	0.000361734	2	1677	6.66323	6.53128	0
	High	lASDLLEWIR	2	2	2	Q9Z1P2;Q9QXQ0	N-Term(iTRAQ8plex)	0																						40.49	0.000558316	2	1519.88	2.94953	6.25379	0
	High	gISQEQMQEFR	2	1	1	Q9QXQ0	N-Term(iTRAQ8plex)	0	1.18031	2	8.82678	1.22253	2	6.16925	1.09486	2	8.42326	1.06973	2	1.1989	1.05767	2	5.4367	1.09154	2	10.3845	0.941227	2	0.980008	38.33	0.000448023	2	1656.84	7.71269	10.8229	0
	High	gyEEWLLNEIR	1	2	2	Q9Z1P2;Q9QXQ0	N-Term(iTRAQ8plex); Y2(iTRAQ8plex)	0																						29.42	0.00914303	3	2030.13	6.19434	6.49088	0
	High	tIPWLEDR	1	1	1	Q9QXQ0	N-Term(iTRAQ8plex)	0																						27.65	0.00549731	2	1333.74	-3.59533	9.93383	0
Q63028	Alpha-adducin OS=Rattus norvegicus GN=Add1 PE=1 SV=2 - [ADDA_RAT]	57.71	1.36	1	1	1	2	0.904732	2	6.33565	0.741767	2	5.36146	0.821993	2	6.96684	0.940021	2	30.0314	0.975469	2	8.39701	0.901089	2	9.7263	0.86262	2	8.32784	735	80.3053	6.15088
	A2	Sequence	# PSMs	# Proteins	# Protein Groups	Protein Group Accessions	Modifications	ΔCn	(115+116)/(113+114)	(115+116)/(113+114) Count	(115+116)/(113+114) Variability [%]	(117+118)/(113+114)	(117+118)/(113+114) Count	(117+118)/(113+114) Variability [%]	(119+121)/(113+114)	(119+121)/(113+114) Count	(119+121)/(113+114) Variability [%]	114/113	114/113 Count	114/113 Variability [%]	115/116	115/116 Count	115/116 Variability [%]	117/118	117/118 Count	117/118 Variability [%]	119/121	119/121 Count	119/121 Variability [%]	IonScore	Exp Value	Charge	MH+ [Da]	ΔM [ppm]	RT [min]	# Missed Cleavages
	High	gSEENLDETR	2	1	1	Q63028	N-Term(iTRAQ8plex)	0	0.904732	2	6.33565	0.741767	2	5.36146	0.821993	2	6.96684	0.940021	2	30.0314	0.975469	2	8.39701	0.901089	2	9.7263	0.86262	2	8.32784	41.49	7.80536e-05	2	1453.71	-0.2026	17.653	0
P85515	Alpha-centractin OS=Rattus norvegicus GN=Actr1a PE=1 SV=1 - [ACTZ_RAT]	55.3	3.99	1	2	2	3	1.22624	3	0.570967	1.60473	3	3.2388	1.35499	3	0.474459	1.11145	3	4.81913	1.11352	3	1.32833	1.16989	3	7.06061	1.06217	3	5.44869	376	42.5869	6.63916
	A2	Sequence	# PSMs	# Proteins	# Protein Groups	Protein Group Accessions	Modifications	ΔCn	(115+116)/(113+114)	(115+116)/(113+114) Count	(115+116)/(113+114) Variability [%]	(117+118)/(113+114)	(117+118)/(113+114) Count	(117+118)/(113+114) Variability [%]	(119+121)/(113+114)	(119+121)/(113+114) Count	(119+121)/(113+114) Variability [%]	114/113	114/113 Count	114/113 Variability [%]	115/116	115/116 Count	115/116 Variability [%]	117/118	117/118 Count	117/118 Variability [%]	119/121	119/121 Count	119/121 Variability [%]	IonScore	Exp Value	Charge	MH+ [Da]	ΔM [ppm]	RT [min]	# Missed Cleavages
	High	dWNDMER	2	1	1	P85515	N-Term(iTRAQ8plex)	0	1.22388	2	0.285482	1.62235	2	1.61908	1.35716	2	0.237229	1.12965	2	2.40852	1.08249	2	4.19103	1.19805	2	3.52701	1.08185	2	2.72283	34.02	0.000395339	2	1269.57	-8.2907	14.7993	0
	High	eYEEDGAR	1	1	1	P85515	N-Term(iTRAQ8plex)	0	1.23618	1		1.26788	1		1.26967	1		0.985299	1		1.12354	1		1.11151	1		0.987552	1		16.55	0.0220785	2	1272.6	-3.24686	21.2179	0
P04764	Alpha-enolase OS=Rattus norvegicus GN=Eno1 PE=1 SV=4 - [ENOA_RAT]	743.036	13.36	1	4	5	23	1.57629	14	20.7319	2.34857	14	14.4739	2.03481	14	31.0027	1.01357	8	13.1176	0.935441	13	13.2632	1.17289	16	35.2478	0.909967	16	18.5073	434	47.0982	6.56592
	A2	Sequence	# PSMs	# Proteins	# Protein Groups	Protein Group Accessions	Modifications	ΔCn	(115+116)/(113+114)	(115+116)/(113+114) Count	(115+116)/(113+114) Variability [%]	(117+118)/(113+114)	(117+118)/(113+114) Count	(117+118)/(113+114) Variability [%]	(119+121)/(113+114)	(119+121)/(113+114) Count	(119+121)/(113+114) Variability [%]	114/113	114/113 Count	114/113 Variability [%]	115/116	115/116 Count	115/116 Variability [%]	117/118	117/118 Count	117/118 Variability [%]	119/121	119/121 Count	119/121 Variability [%]	IonScore	Exp Value	Charge	MH+ [Da]	ΔM [ppm]	RT [min]	# Missed Cleavages
	High	aAVPSGASTGIYEALELR	7	2	2	P07323;P04764	N-Term(iTRAQ8plex)	0																						103.47	3.35086e-10	3	2109.16	3.89996	12.7271	0
	High	gNPTVEVDLYTAk	7	1	1	P04764	N-Term(iTRAQ8plex); K13(iTRAQ8plex)	0	1.49348	7	63.9166	2.74933	7	36.813	2.39347	7	36.1091	1.05046	2	9.00582	0.988702	5	10.0147	1.31902	7	32.0713	1.11499	7	29.9594	60.6	6.57578e-06	2	2015.13	1.35226	11.3106	0
	High	yITPDQLADLYk	6	1	1	P04764	N-Term(iTRAQ8plex); K12(iTRAQ8plex)	0	1.75131	5	37.3727	2.34452	5	13.995	1.8698	5	27.2096	1.08312	4	19.7488	0.891198	5	9.7231	1.07443	6	28.2729	0.832483	6	14.4443	53.78	2.429e-05	3	2048.15	-0.204872	18.2483	0
	High	iEEELGSk	2	1	1	P04764	N-Term(iTRAQ8plex); K8(iTRAQ8plex)	0	1.50162	2	4.62064	2.34225	2	0.655385	1.67965	2	0.726846	0.986101	2	7.77404	0.943607	2	14.5707	1.1228	2	1.13806	0.849751	2	6.777	30.63	0.0052763	2	1512.87	-4.5178	16.5493	0
	High	eALELLk	1	1	1	P04764	N-Term(iTRAQ8plex); K7(iTRAQ8plex)	0													2.03461	1		1.89718	1		0.905028	1		28.14	0.00798001	3	1423.89	-6.57023	8.1087	0
P23565	Alpha-internexin OS=Rattus norvegicus GN=Ina PE=1 SV=2 - [AINX_RAT]	760.942	22.18	1	10	12	39	2.51149	25	16.7854	2.43271	25	17.4474	4.29514	25	20.6256	0.876201	25	21.9057	1.02183	25	7.36406	0.946129	25	7.61318	0.967405	25	4.59555	505	56.0816	5.22412
	A2	Sequence	# PSMs	# Proteins	# Protein Groups	Protein Group Accessions	Modifications	ΔCn	(115+116)/(113+114)	(115+116)/(113+114) Count	(115+116)/(113+114) Variability [%]	(117+118)/(113+114)	(117+118)/(113+114) Count	(117+118)/(113+114) Variability [%]	(119+121)/(113+114)	(119+121)/(113+114) Count	(119+121)/(113+114) Variability [%]	114/113	114/113 Count	114/113 Variability [%]	115/116	115/116 Count	115/116 Variability [%]	117/118	117/118 Count	117/118 Variability [%]	119/121	119/121 Count	119/121 Variability [%]	IonScore	Exp Value	Charge	MH+ [Da]	ΔM [ppm]	RT [min]	# Missed Cleavages
	High	eYQDLLNVk	12	4	3	P19527;P23565;P12839	N-Term(iTRAQ8plex); K9(iTRAQ8plex)	0																						51.51	5.01485e-05	2	1729.98	-6.44361	12.7916	0
	High	lPASDGLDLSQAAAR	1	1	1	P23565	N-Term(iTRAQ8plex)	0	2.70199	1		3.11628	1		4.55578	1		1.16205	1		0.885178	1		1.20224	1		0.890506	1		47.13	0.000150073	2	1788.98	1.54944	15.4092	0
	High	dGLAEEVQR	5	1	1	P23565	N-Term(iTRAQ8plex)	0	2.5739	5	5.91862	2.63203	5	9.03522	4.56453	5	11.244	0.934268	5	9.53501	1.00898	5	2.46807	0.915052	5	1.67009	0.881547	5	2.49921	44.85	9.16554e-05	2	1320.7	-6.30712	19.6249	0
	High	vESLLDELAFVR	2	1	1	P23565	N-Term(iTRAQ8plex)	0	2.92216	2	7.58075	2.53893	2	1.80759	4.85167	2	11.3256	0.907134	2	17.7986	1.06313	2	1.47901	0.906457	2	11.5084	1.02388	2	7.84415	40.01	0.000608597	2	1694.96	-2.03484	12.1484	0
	High	kVESLLDELAFVR	1	1	1	P23565	N-Term(iTRAQ8plex); K1(iTRAQ8plex)	0	1.27742	1		2.31186	1		2.94594	1		0.325008	1		1.4114	1		0.909401	1		1.24329	1		39.14	0.000676539	3	2127.25	-6.52271	8.6239	1
	High	dVDGATLAR	3	1	1	P23565	N-Term(iTRAQ8plex)	0	2.51912	3	3.65194	2.46174	3	3.61029	4.511	3	12.109	0.920892	3	17.332	0.903819	3	2.08106	0.94381	3	0.292253	0.967405	3	0.0788239	37.35	0.000653474	2	1221.66	-8.87781	14.6479	0
	High	mALDIEIAAYR	2	3	3	P19527;P23565;P12839	N-Term(iTRAQ8plex)	0																						36.73	0.0011147	2	1569.86	0.539439	16.7324	0
	High	aQLEEASSAR	1	1	1	P23565	N-Term(iTRAQ8plex)	0	2.44021	1		2.43271	1		4.12043	1		1.01659	1		1.00955	1		0.87727	1		0.936648	1		36	0.000941957	2	1365.71	-9.74604	8.87291	0
	High	aLEAELAALR	6	1	1	P23565	N-Term(iTRAQ8plex)	0	1.34124	6	126.249	1.3365	6	129.13	2.21185	6	108.533	0.467283	6	113.536	1.03316	6	6.31171	1.10254	6	9.56383	0.976142	6	3.69521	34.56	0.00171473	2	1360.82	4.58736	9.4146	0
	High	nLQSAEEWYk	1	1	1	P23565	N-Term(iTRAQ8plex); K10(iTRAQ8plex)	0	1.51246	1		1.99495	1		1.9684	1		0.827132	1		1.06183	1		1.08288	1		1.07033	1		33.96	0.00233039	2	1876	-1.47004	13.5215	0
	High	gANESLER	2	1	1	P23565	N-Term(iTRAQ8plex)	0	2.69666	2	12.7447	2.67	2	16.7807	4.88466	2	12.1325	0.850938	2	7.61083	0.974837	2	11.9583	0.929271	2	5.96578	0.964661	2	1.1644	32.18	0.00163442	2	1179.62	-3.12016	10.7272	0
	High	tIEIEGLR	3	1	1	P23565	N-Term(iTRAQ8plex)	0	2.22743	3	11.8105	2.16051	3	22.1772	3.41964	3	28.7742	1.02742	3	1.57072	1.02842	3	15.3458	0.946129	3	0.43821	0.952524	3	5.92217	29.17	0.00411603	2	1234.73	0.297612	9.56703	0
P28494	Alpha-mannosidase 2 (Fragment) OS=Rattus norvegicus GN=Man2a1 PE=1 SV=1 - [MA2A1_RAT]	30.05	2.25	1	1	1	1	1.04812	1		0.930518	1		0.969412	1		0.939312	1		0.928153	1		1.1711	1		0.884783	1		489	56.7002	6.66846
	A2	Sequence	# PSMs	# Proteins	# Protein Groups	Protein Group Accessions	Modifications	ΔCn	(115+116)/(113+114)	(115+116)/(113+114) Count	(115+116)/(113+114) Variability [%]	(117+118)/(113+114)	(117+118)/(113+114) Count	(117+118)/(113+114) Variability [%]	(119+121)/(113+114)	(119+121)/(113+114) Count	(119+121)/(113+114) Variability [%]	114/113	114/113 Count	114/113 Variability [%]	115/116	115/116 Count	115/116 Variability [%]	117/118	117/118 Count	117/118 Variability [%]	119/121	119/121 Count	119/121 Variability [%]	IonScore	Exp Value	Charge	MH+ [Da]	ΔM [ppm]	RT [min]	# Missed Cleavages
	High	vLLAPLGDDFR	1	1	1	P28494	N-Term(iTRAQ8plex)	0	1.04812	1		0.930518	1		0.969412	1		0.939312	1		0.928153	1		1.1711	1		0.884783	1		30.05	0.00588189	2	1519.88	2.1398	10.3122	0
Q9HB97	Alpha-parvin OS=Rattus norvegicus GN=Parva PE=1 SV=2 - [PARVA_RAT]	51.71	4.3	1	1	1	1	1.2871	1		1.10499	1		0.976393	1		0.945542	1		1.13076	1		0.955236	1		1.02531	1		372	42.2654	5.94775
	A2	Sequence	# PSMs	# Proteins	# Protein Groups	Protein Group Accessions	Modifications	ΔCn	(115+116)/(113+114)	(115+116)/(113+114) Count	(115+116)/(113+114) Variability [%]	(117+118)/(113+114)	(117+118)/(113+114) Count	(117+118)/(113+114) Variability [%]	(119+121)/(113+114)	(119+121)/(113+114) Count	(119+121)/(113+114) Variability [%]	114/113	114/113 Count	114/113 Variability [%]	115/116	115/116 Count	115/116 Variability [%]	117/118	117/118 Count	117/118 Variability [%]	119/121	119/121 Count	119/121 Variability [%]	IonScore	Exp Value	Charge	MH+ [Da]	ΔM [ppm]	RT [min]	# Missed Cleavages
	High	qIQEEITGNTEALSGR	1	1	1	Q9HB97	N-Term(iTRAQ8plex)	0	1.2871	1		1.10499	1		0.976393	1		0.945542	1		1.13076	1		0.955236	1		1.02531	1		51.71	4.38443e-05	2	2050.08	1.8828	19.5364	0
P35433	Amidophosphoribosyltransferase OS=Rattus norvegicus GN=Ppat PE=1 SV=1 - [PUR1_RAT]	28.53	1.93	1	1	1	1	0.788258	1		0.734967	1		0.960046	1		0.92987	1		0.948425	1		0.93824	1		0.689889	1		517	57.4004	7.13721
	A2	Sequence	# PSMs	# Proteins	# Protein Groups	Protein Group Accessions	Modifications	ΔCn	(115+116)/(113+114)	(115+116)/(113+114) Count	(115+116)/(113+114) Variability [%]	(117+118)/(113+114)	(117+118)/(113+114) Count	(117+118)/(113+114) Variability [%]	(119+121)/(113+114)	(119+121)/(113+114) Count	(119+121)/(113+114) Variability [%]	114/113	114/113 Count	114/113 Variability [%]	115/116	115/116 Count	115/116 Variability [%]	117/118	117/118 Count	117/118 Variability [%]	119/121	119/121 Count	119/121 Variability [%]	IonScore	Exp Value	Charge	MH+ [Da]	ΔM [ppm]	RT [min]	# Missed Cleavages
	High	iVLIDDSIVR	1	1	1	P35433	N-Term(iTRAQ8plex)	0	0.788258	1		0.734967	1		0.960046	1		0.92987	1		0.948425	1		0.93824	1		0.689889	1		28.53	0.00434872	2	1446.89	6.39607	10.6248	0
P21396	Amine oxidase [flavin-containing] A OS=Rattus norvegicus GN=Maoa PE=1 SV=1 - [AOFA_RAT]	79.7575	4.75	1	2	2	4	0.995444	3	7.76028	0.950951	3	6.94915	0.999283	3	13.3054	1.12041	3	15.5735	0.925376	3	0.551121	1.15459	3	5.8073	1.07446	3	6.71535	526	59.4696	7.92822
	A2	Sequence	# PSMs	# Proteins	# Protein Groups	Protein Group Accessions	Modifications	ΔCn	(115+116)/(113+114)	(115+116)/(113+114) Count	(115+116)/(113+114) Variability [%]	(117+118)/(113+114)	(117+118)/(113+114) Count	(117+118)/(113+114) Variability [%]	(119+121)/(113+114)	(119+121)/(113+114) Count	(119+121)/(113+114) Variability [%]	114/113	114/113 Count	114/113 Variability [%]	115/116	115/116 Count	115/116 Variability [%]	117/118	117/118 Count	117/118 Variability [%]	119/121	119/121 Count	119/121 Variability [%]	IonScore	Exp Value	Charge	MH+ [Da]	ΔM [ppm]	RT [min]	# Missed Cleavages
	High	dVPAIEITHTFLER	1	1	1	P21396	N-Term(iTRAQ8plex)	0	0.76561	1		0.907458	1		0.803252	1		1.24373	1		0.882748	1		1.72719	1		0.889338	1		63.96	3.19424e-06	3	1945.08	6.77481	8.20914	0
	High	iFSVTnGGQER	3	1	1	P21396	N-Term(iTRAQ8plex); N6(Deamidated)	0	1.0218	2	3.87577	0.996291	2	6.9138	1.04494	2	6.6308	1.00425	2	16.3362	0.927097	2	0.275559	1.13221	2	2.90182	1.09905	2	3.35484	24.47	0.00928909	2	1512.79	-1.33157	20.5464	0
Q6AYS7	Aminoacylase-1A OS=Rattus norvegicus GN=Acy1a PE=1 SV=1 - [ACY1A_RAT]	40.91	2.21	1	1	1	1	0.981426	1		1.05171	1		1.0787	1		0.90565	1		0.965628	1		1.16141	1		0.805779	1		408	45.7751	6.48096
	A2	Sequence	# PSMs	# Proteins	# Protein Groups	Protein Group Accessions	Modifications	ΔCn	(115+116)/(113+114)	(115+116)/(113+114) Count	(115+116)/(113+114) Variability [%]	(117+118)/(113+114)	(117+118)/(113+114) Count	(117+118)/(113+114) Variability [%]	(119+121)/(113+114)	(119+121)/(113+114) Count	(119+121)/(113+114) Variability [%]	114/113	114/113 Count	114/113 Variability [%]	115/116	115/116 Count	115/116 Variability [%]	117/118	117/118 Count	117/118 Variability [%]	119/121	119/121 Count	119/121 Variability [%]	IonScore	Exp Value	Charge	MH+ [Da]	ΔM [ppm]	RT [min]	# Missed Cleavages
	High	fIEDTAAEk	1	1	1	Q6AYS7	N-Term(iTRAQ8plex); K9(iTRAQ8plex)	0	0.981426	1		1.05171	1		1.0787	1		0.90565	1		0.965628	1		1.16141	1		0.805779	1		40.91	0.000567673	2	1631.91	-0.753856	13.7106	0
Q02356	AMP deaminase 2 OS=Rattus norvegicus GN=Ampd2 PE=2 SV=2 - [AMPD2_RAT]	32.995	2.06	1	2	2	2	1.10113	2	14.2598	1.02286	2	17.5145	0.734779	2	32.4766	0.939292	2	0.440138	1.03091	2	15.9217	1.20685	2	5.05086	0.945194	2	4.01244	824	94.7269	6.50732
	A2	Sequence	# PSMs	# Proteins	# Protein Groups	Protein Group Accessions	Modifications	ΔCn	(115+116)/(113+114)	(115+116)/(113+114) Count	(115+116)/(113+114) Variability [%]	(117+118)/(113+114)	(117+118)/(113+114) Count	(117+118)/(113+114) Variability [%]	(119+121)/(113+114)	(119+121)/(113+114) Count	(119+121)/(113+114) Variability [%]	114/113	114/113 Count	114/113 Variability [%]	115/116	115/116 Count	115/116 Variability [%]	117/118	117/118 Count	117/118 Variability [%]	119/121	119/121 Count	119/121 Variability [%]	IonScore	Exp Value	Charge	MH+ [Da]	ΔM [ppm]	RT [min]	# Missed Cleavages
	High	lEPDILLR	1	1	1	Q02356	N-Term(iTRAQ8plex)	0	1.00064	1		0.909702	1		0.593469	1		0.936508	1		1.14701	1		1.24864	1		0.971113	1		26.03	0.0113504	2	1272.78	-4.34479	10.9027	0
	High	eGPEGNDIR	1	1	1	Q02356	N-Term(iTRAQ8plex)	0	1.21171	1		1.1501	1		0.909735	1		0.942084	1		0.926556	1		1.16645	1		0.919967	1		23.25	0.00591439	2	1290.66	-1.28849	15.7388	0
P08592	Amyloid beta A4 protein OS=Rattus norvegicus GN=App PE=1 SV=2 - [A4_RAT]	58.44	2.6	1	2	2	2	1.17039	2	12.6991	1.03799	2	44.4641	1.14455	2	50.9388	1.01345	2	3.50225	0.988747	2	5.38682	1.01915	2	2.7103	0.86811	2	12.6267	770	86.6491	4.80518
	A2	Sequence	# PSMs	# Proteins	# Protein Groups	Protein Group Accessions	Modifications	ΔCn	(115+116)/(113+114)	(115+116)/(113+114) Count	(115+116)/(113+114) Variability [%]	(117+118)/(113+114)	(117+118)/(113+114) Count	(117+118)/(113+114) Variability [%]	(119+121)/(113+114)	(119+121)/(113+114) Count	(119+121)/(113+114) Variability [%]	114/113	114/113 Count	114/113 Variability [%]	115/116	115/116 Count	115/116 Variability [%]	117/118	117/118 Count	117/118 Variability [%]	119/121	119/121 Count	119/121 Variability [%]	IonScore	Exp Value	Charge	MH+ [Da]	ΔM [ppm]	RT [min]	# Missed Cleavages
	High	eVcSEQAETGPcR	1	1	1	P08592	N-Term(iTRAQ8plex); C3(Carbamidomethyl); C12(Carbamidomethyl)	0	1.07468	1		0.779422	1		0.827824	1		0.989795	1		1.02531	1		1.00069	1		0.797506	1		50.83	8.24081e-06	2	1826.83	-1.28646	15.0828	0
	High	eWEEAER	1	1	1	P08592	N-Term(iTRAQ8plex)	0	1.27462	1		1.38233	1		1.58245	1		1.03766	1		0.953492	1		1.03794	1		0.944965	1		20.61	0.00866902	2	1252.6	-8.01491	14.9731	0
Q6DGF4	AN1-type zinc finger protein 6 OS=Rattus norvegicus GN=Zfand6 PE=2 SV=1 - [ZFAN6_RAT]	46.23	5.38	1	1	1	1	0.592224	1		0.504238	1		0.443607	1		0.932876	1		1.12168	1		1.01956	1		0.819027	1		223	23.9853	6.50732
	A2	Sequence	# PSMs	# Proteins	# Protein Groups	Protein Group Accessions	Modifications	ΔCn	(115+116)/(113+114)	(115+116)/(113+114) Count	(115+116)/(113+114) Variability [%]	(117+118)/(113+114)	(117+118)/(113+114) Count	(117+118)/(113+114) Variability [%]	(119+121)/(113+114)	(119+121)/(113+114) Count	(119+121)/(113+114) Variability [%]	114/113	114/113 Count	114/113 Variability [%]	115/116	115/116 Count	115/116 Variability [%]	117/118	117/118 Count	117/118 Variability [%]	119/121	119/121 Count	119/121 Variability [%]	IonScore	Exp Value	Charge	MH+ [Da]	ΔM [ppm]	RT [min]	# Missed Cleavages
	High	aVSETEDLQGPR	1	1	1	Q6DGF4	N-Term(iTRAQ8plex)	0	0.592224	1		0.504238	1		0.443607	1		0.932876	1		1.12168	1		1.01956	1		0.819027	1		46.23	7.98077e-05	2	1605.83	-7.71679	15.3789	0
A1L1K3	Anaphase-promoting complex subunit 5 OS=Rattus norvegicus GN=Anapc5 PE=2 SV=1 - [APC5_RAT]	32.24	1.51	1	1	1	1	1.14995	1		1.04916	1		1.18008	1		1.01105	1		1.14137	1		1.06562	1		1.00506	1		727	81.6871	6.771
	A2	Sequence	# PSMs	# Proteins	# Protein Groups	Protein Group Accessions	Modifications	ΔCn	(115+116)/(113+114)	(115+116)/(113+114) Count	(115+116)/(113+114) Variability [%]	(117+118)/(113+114)	(117+118)/(113+114) Count	(117+118)/(113+114) Variability [%]	(119+121)/(113+114)	(119+121)/(113+114) Count	(119+121)/(113+114) Variability [%]	114/113	114/113 Count	114/113 Variability [%]	115/116	115/116 Count	115/116 Variability [%]	117/118	117/118 Count	117/118 Variability [%]	119/121	119/121 Count	119/121 Variability [%]	IonScore	Exp Value	Charge	MH+ [Da]	ΔM [ppm]	RT [min]	# Missed Cleavages
	High	tGEGAVSLVER	1	1	1	A1L1K3	N-Term(iTRAQ8plex)	0	1.14995	1		1.04916	1		1.18008	1		1.01105	1		1.14137	1		1.06562	1		1.00506	1		32.24	0.00352251	2	1421.78	-6.00478	9.47872	0
P00763	Anionic trypsin-2 OS=Rattus norvegicus GN=Prss2 PE=1 SV=2 - [TRY2_RAT]	50.834	4.07	1	1	1	3	0.849408	1		1.16689	2	16.1542	1.0029	1		1.29927	1		0.982876	1		1.09652	1		0.862176	1		246	26.2108	4.97021
	A2	Sequence	# PSMs	# Proteins	# Protein Groups	Protein Group Accessions	Modifications	ΔCn	(115+116)/(113+114)	(115+116)/(113+114) Count	(115+116)/(113+114) Variability [%]	(117+118)/(113+114)	(117+118)/(113+114) Count	(117+118)/(113+114) Variability [%]	(119+121)/(113+114)	(119+121)/(113+114) Count	(119+121)/(113+114) Variability [%]	114/113	114/113 Count	114/113 Variability [%]	115/116	115/116 Count	115/116 Variability [%]	117/118	117/118 Count	117/118 Variability [%]	119/121	119/121 Count	119/121 Variability [%]	IonScore	Exp Value	Charge	MH+ [Da]	ΔM [ppm]	RT [min]	# Missed Cleavages
	High	tLNnDIMLIk	3	1	1	P00763	N-Term(iTRAQ8plex); N4(Deamidated); K10(iTRAQ8plex)	0	0.849408	1		1.16689	2	16.1542	1.0029	1		1.29927	1		0.982876	1		1.09652	1		0.862176	1		43.09	0.000301908	2	1784.05	0.427414	11.4698	0
Q07936	Annexin A2 OS=Rattus norvegicus GN=Anxa2 PE=1 SV=2 - [ANXA2_RAT]	769.749	28.91	1	9	9	27	3.12557	23	55.4706	5.08275	23	74.9375	3.28458	23	54.6132	0.969992	20	35.6758	1.03033	26	16.9073	1.18054	25	17.529	0.956968	25	10.6232	339	38.6538	7.69385
	A2	Sequence	# PSMs	# Proteins	# Protein Groups	Protein Group Accessions	Modifications	ΔCn	(115+116)/(113+114)	(115+116)/(113+114) Count	(115+116)/(113+114) Variability [%]	(117+118)/(113+114)	(117+118)/(113+114) Count	(117+118)/(113+114) Variability [%]	(119+121)/(113+114)	(119+121)/(113+114) Count	(119+121)/(113+114) Variability [%]	114/113	114/113 Count	114/113 Variability [%]	115/116	115/116 Count	115/116 Variability [%]	117/118	117/118 Count	117/118 Variability [%]	119/121	119/121 Count	119/121 Variability [%]	IonScore	Exp Value	Charge	MH+ [Da]	ΔM [ppm]	RT [min]	# Missed Cleavages
	High	gVDEVTIVNILTNR	4	1	1	Q07936	N-Term(iTRAQ8plex)	0	4.72024	3	1.73603	6.82335	3	5.67713	5.17657	3	0.947814	0.91558	2	48.0057	1.03886	3	10.8238	1.04183	3	1.68535	0.910016	3	7.50656	81.82	4.66937e-08	3	1847.04	-7.22655	6.7282	0
	High	gLGTDEDSLIEIIcSR	3	1	1	Q07936	N-Term(iTRAQ8plex); C14(Carbamidomethyl)	0	6.78378	2	26.4875	10.2882	2	39.175	7.15086	2	17.565	1.50819	1		0.905702	3	1.20515	1.01323	2	7.24958	1.01768	2	4.96811	79.58	5.89324e-08	2	2082.07	0.133634	8.08854	0
	High	tPAQYDASELk	2	1	1	Q07936	N-Term(iTRAQ8plex); K11(iTRAQ8plex)	0	2.34546	2	119.846	3.50869	2	167.121	2.67966	2	114.814	0.648994	2	12.3638	1.34839	2	24.2452	1.14746	2	1.12995	0.817875	2	0.743855	76.78	1.31184e-07	2	1830.99	-9.1929	9.23845	0
	High	dALNIETAIk	5	1	1	Q07936	N-Term(iTRAQ8plex); K10(iTRAQ8plex)	0	3.12557	3	22.6875	4.22412	3	27.9584	2.96842	3	46.246	0.828461	3	25.5685	1.04029	5	29.8826	1.33256	5	4.11201	1.08458	5	13.9659	47.51	0.000141048	2	1696.01	-1.56097	11.988	0
	High	tNQELQEINR	4	1	1	Q07936	N-Term(iTRAQ8plex)	0	2.79388	4	38.7561	3.07603	4	47.5457	2.83434	4	41.0325	1.01491	4	16.3605	0.990205	4	3.2326	0.996725	4	5.23469	0.967138	4	3.65008	44.7	0.000123678	3	1548.82	-7.815	12.4783	0
	High	sYSPYDMLESIR	1	1	1	Q07936	N-Term(iTRAQ8plex)	0	2.24888	1		3.01404	1		2.32713	1		0.94034	1		0.941607	1		1.19787	1		1.05771	1		37.79	0.000432487	2	1764.88	-0.987604	18.8704	0
	High	dIISDTSGEFR	2	1	1	Q07936	N-Term(iTRAQ8plex)	0	5.72551	2	26.1987	10.2089	2	33.167	7.26397	2	31.1291	1.16656	1		0.819405	2	8.6528	1.4152	2	11.1522	0.788169	2	36.6598	35.53	0.000531806	2	1543.79	-1.35482	17.079	0
	High	sEVDMLk	4	1	1	Q07936	N-Term(iTRAQ8plex); K7(iTRAQ8plex)	0	2.71062	4	24.1317	4.10206	4	23.2614	3.1296	4	13.171	1.22752	4	6.64158	1.13538	4	9.26294	1.24013	4	5.68973	0.939432	4	2.21461	33.01	0.00337523	2	1429.82	4.141	12.4347	0
	High	lLVALAk	2	1	1	Q07936	N-Term(iTRAQ8plex); K7(iTRAQ8plex)	0	2.95381	2	5.09272	5.23874	2	0.47426	3.43511	2	6.65087	0.931232	2	17.9683	1.10775	2	1.2168	1.18771	2	0.897694	0.881748	2	0.511895	30.42	0.00090567	2	1335.92	1.81348	4.48647	0
P55260	Annexin A4 OS=Rattus norvegicus GN=Anxa4 PE=1 SV=3 - [ANXA4_RAT]	119.613	8.15	1	2	2	3	1.14212	3	1.54802	1.43923	3	1.1566	1.15201	3	0.0548834	1.00746	3	3.09721	0.987588	3	1.28079	1.11123	3	2.10208	0.916683	3	0.909006	319	35.826	5.43994
	A2	Sequence	# PSMs	# Proteins	# Protein Groups	Protein Group Accessions	Modifications	ΔCn	(115+116)/(113+114)	(115+116)/(113+114) Count	(115+116)/(113+114) Variability [%]	(117+118)/(113+114)	(117+118)/(113+114) Count	(117+118)/(113+114) Variability [%]	(119+121)/(113+114)	(119+121)/(113+114) Count	(119+121)/(113+114) Variability [%]	114/113	114/113 Count	114/113 Variability [%]	115/116	115/116 Count	115/116 Variability [%]	117/118	117/118 Count	117/118 Variability [%]	119/121	119/121 Count	119/121 Variability [%]	IonScore	Exp Value	Charge	MH+ [Da]	ΔM [ppm]	RT [min]	# Missed Cleavages
	High	gLGTDDSTLIR	2	1	1	P55260	N-Term(iTRAQ8plex)	0	1.13618	2	0.773977	1.44486	2	0.578285	1.15222	2	0.0274417	1.04482	2	5.40283	0.983332	2	0.640375	1.14383	2	6.39549	0.919498	2	0.454496	57.3	8.19318e-06	2	1451.81	8.37058	16.0523	0
	High	aASGFNATEDAQVLR	1	1	1	P55260	N-Term(iTRAQ8plex)	0	1.16763	1		1.31918	1		1.12844	1		0.986635	1		1.00213	1		1.11123	1		0.908705	1		44.01	0.000188666	2	1853.97	0.810977	16.0823	0
P14668	Annexin A5 OS=Rattus norvegicus GN=Anxa5 PE=1 SV=3 - [ANXA5_RAT]	102.231	6.58	1	2	2	3	2.98179	3	6.91835	3.05073	3	2.03149	1.61989	3	2.77035	1.03375	3	6.91201	0.886883	3	4.48552	1.06247	3	2.98163	0.994259	3	2.39861	319	35.7223	5.04639
	A2	Sequence	# PSMs	# Proteins	# Protein Groups	Protein Group Accessions	Modifications	ΔCn	(115+116)/(113+114)	(115+116)/(113+114) Count	(115+116)/(113+114) Variability [%]	(117+118)/(113+114)	(117+118)/(113+114) Count	(117+118)/(113+114) Variability [%]	(119+121)/(113+114)	(119+121)/(113+114) Count	(119+121)/(113+114) Variability [%]	114/113	114/113 Count	114/113 Variability [%]	115/116	115/116 Count	115/116 Variability [%]	117/118	117/118 Count	117/118 Variability [%]	119/121	119/121 Count	119/121 Variability [%]	IonScore	Exp Value	Charge	MH+ [Da]	ΔM [ppm]	RT [min]	# Missed Cleavages
	High	gTVTDFSGFDGR	2	1	1	P14668	N-Term(iTRAQ8plex)	0	3.05209	2	3.45608	3.0717	2	1.01567	1.6351	2	1.38498	1.00996	2	3.45291	0.885062	2	4.79067	1.05184	2	1.49057	1.01272	2	2.72791	58.23	2.85597e-06	2	1562.77	-3.49272	19.0364	0
	High	sEIDLFNIR	1	1	1	P14668	N-Term(iTRAQ8plex)	0	2.84132	1		2.5512	1		1.35605	1		1.15091	1		0.886883	1		1.09679	1		0.978305	1		32.09	0.00173045	2	1410.79	0.529796	18.1596	0
P48037	Annexin A6 OS=Rattus norvegicus GN=Anxa6 PE=1 SV=2 - [ANXA6_RAT]	465.803	13.97	1	9	9	17	1.39026	17	20.4427	1.96168	17	16.2572	1.44336	17	13.7328	1.02743	17	11.7175	1.00179	17	7.61785	1.1618	17	11.6169	0.971483	17	5.8818	673	75.7065	5.56689
	A2	Sequence	# PSMs	# Proteins	# Protein Groups	Protein Group Accessions	Modifications	ΔCn	(115+116)/(113+114)	(115+116)/(113+114) Count	(115+116)/(113+114) Variability [%]	(117+118)/(113+114)	(117+118)/(113+114) Count	(117+118)/(113+114) Variability [%]	(119+121)/(113+114)	(119+121)/(113+114) Count	(119+121)/(113+114) Variability [%]	114/113	114/113 Count	114/113 Variability [%]	115/116	115/116 Count	115/116 Variability [%]	117/118	117/118 Count	117/118 Variability [%]	119/121	119/121 Count	119/121 Variability [%]	IonScore	Exp Value	Charge	MH+ [Da]	ΔM [ppm]	RT [min]	# Missed Cleavages
	High	gIGTDEATIIDIITQR	2	1	1	P48037	N-Term(iTRAQ8plex)	0	1.59604	2	0.791868	2.43682	2	7.7248	1.78031	2	2.3843	0.994181	2	6.5119	1.01018	2	2.17145	1.14651	2	13.0498	1.00982	2	10.634	86.54	1.29764e-08	2	2020.12	-3.86783	15.5241	0
	High	aANDFNPDADAk	2	1	1	P48037	N-Term(iTRAQ8plex); K12(iTRAQ8plex)	0	1.56495	2	3.77935	2.08395	2	7.19579	1.44905	2	0.583012	0.848029	2	7.07271	1.06218	2	5.30266	1.24173	2	9.5251	0.901865	2	5.59211	63.09	1.79181e-06	2	1856.94	-9.28233	16.0653	0
	High	dAISGIGTDEk	1	1	1	P48037	N-Term(iTRAQ8plex); K11(iTRAQ8plex)	0	1.11526	1		1.64242	1		1.11497	1		0.882235	1		1.05453	1		1.14987	1		1.01076	1		55.3	1.54938e-05	2	1713.93	-9.55414	13.864	0
	High	sELDMLDIR	1	1	1	P48037	N-Term(iTRAQ8plex)	0	1.76586	1		2.39462	1		1.6809	1		1.11163	1		0.916167	1		1.13252	1		1.06019	1		47.01	7.86316e-05	2	1395.74	-3.695	7.74653	0
	High	aMEGAGTDEk	1	1	1	P48037	N-Term(iTRAQ8plex); K10(iTRAQ8plex)	0	1.20826	1		1.96168	1		1.32854	1		1.19039	1		1.14973	1		1.31065	1		0.885283	1		44.2	0.000104552	2	1616.83	-4.18422	14.1323	0
	High	sEIDLLNIR	2	1	1	P48037	N-Term(iTRAQ8plex)	0	1.55479	2	4.49427	1.75817	2	6.17276	1.38854	2	0.330743	0.96506	2	8.44055	0.95539	2	5.0778	1.08487	2	1.36253	0.920863	2	8.3642	36.57	0.000782039	2	1376.8	-3.9084	10.9349	0
	High	lVFDEYLk	2	1	1	P48037	N-Term(iTRAQ8plex); K8(iTRAQ8plex)	0	1.29972	2	3.22168	1.93087	2	4.30705	1.61607	2	3.08823	0.963734	2	16.4136	1.01886	2	2.50653	1.09421	2	8.90305	0.926906	2	11.7556	34.77	0.00150042	2	1634.96	-0.0183431	13.1762	0
	High	gELSGDFEk	2	1	1	P48037	N-Term(iTRAQ8plex); K9(iTRAQ8plex)	0	1.47024	2	11.9844	1.83778	2	0.244072	1.24239	2	15.2821	1.09494	2	16.5207	1.13781	2	33.396	1.32144	2	7.52152	1.00468	2	0.763969	34.59	0.00182456	3	1589.85	-9.41135	11.4179	0
	High	sEIDLLnIR	2	1	1	P48037	N-Term(iTRAQ8plex); N7(Deamidated)	0	1.06489	2	4.51123	1.23767	2	3.37629	1.28792	2	1.18385	1.08707	2	5.82333	0.983301	2	7.05642	1.10903	2	6.62121	0.85623	2	15.8112	34.56	0.00155726	2	1377.79	1.40509	23.9896	0
	High	eSILELITSR	2	1	1	P48037	N-Term(iTRAQ8plex)	0	1.37279	2	1.87571	2.14559	2	6.54179	1.50513	2	2.28557	1.02934	2	0.275991	0.883815	2	14.5759	1.39305	2	6.8176	1.00435	2	4.93522	29.47	0.00429322	2	1464.85	-7.21568	13.7247	0
P18484	AP-2 complex subunit alpha-2 OS=Rattus norvegicus GN=Ap2a2 PE=1 SV=3 - [AP2A2_RAT]	169.399	3.2	1	3	3	6	1.16828	6	10.7697	1.33297	6	19.6542	1.29067	6	25.9561	0.913737	6	10.1453	1.13262	6	10.1158	1.07217	6	12.4382	1.07702	6	8.16626	938	103.979	6.93213
	A2	Sequence	# PSMs	# Proteins	# Protein Groups	Protein Group Accessions	Modifications	ΔCn	(115+116)/(113+114)	(115+116)/(113+114) Count	(115+116)/(113+114) Variability [%]	(117+118)/(113+114)	(117+118)/(113+114) Count	(117+118)/(113+114) Variability [%]	(119+121)/(113+114)	(119+121)/(113+114) Count	(119+121)/(113+114) Variability [%]	114/113	114/113 Count	114/113 Variability [%]	115/116	115/116 Count	115/116 Variability [%]	117/118	117/118 Count	117/118 Variability [%]	119/121	119/121 Count	119/121 Variability [%]	IonScore	Exp Value	Charge	MH+ [Da]	ΔM [ppm]	RT [min]	# Missed Cleavages
	High	lTEcLETILNk	4	1	1	P18484	N-Term(iTRAQ8plex); C4(Carbamidomethyl); K11(iTRAQ8plex)	0	1.09354	4	8.36431	1.39534	4	16.5522	1.23343	4	21.6091	0.913737	4	6.32879	1.03406	4	20.1877	1.15094	4	20.9883	1.07702	4	7.90265	54.67	2.81484e-05	2	1942.1	-9.12225	13.3023	0
	High	gLAVFISDIR	1	1	1	P18484	N-Term(iTRAQ8plex)	0	1.26322	1		1.08618	1		1.18784	1		0.843386	1		1.12105	1		1.03184	1		1.08179	1		38.33	0.000631638	2	1394.82	-8.63628	12.5177	0
	High	nADVELQQR	1	1	1	P18484	N-Term(iTRAQ8plex)	0	1.24734	1		1.40874	1		1.56033	1		1.25409	1		1.20125	1		1.006	1		0.946771	1		27.47	0.00644618	2	1376.74	-2.56655	12.7406	0
P62944	AP-2 complex subunit beta OS=Rattus norvegicus GN=Ap2b1 PE=1 SV=1 - [AP2B1_RAT]	64.624	3.09	1	3	3	4	1.17749	4	16.2863	1.35179	4	10.2347	1.26535	3	1.61138	0.887898	3	21.0315	1.02454	3	2.83837	1.19524	4	16.9688	1.00772	3	3.0077	937	104.486	5.37646
	A2	Sequence	# PSMs	# Proteins	# Protein Groups	Protein Group Accessions	Modifications	ΔCn	(115+116)/(113+114)	(115+116)/(113+114) Count	(115+116)/(113+114) Variability [%]	(117+118)/(113+114)	(117+118)/(113+114) Count	(117+118)/(113+114) Variability [%]	(119+121)/(113+114)	(119+121)/(113+114) Count	(119+121)/(113+114) Variability [%]	114/113	114/113 Count	114/113 Variability [%]	115/116	115/116 Count	115/116 Variability [%]	117/118	117/118 Count	117/118 Variability [%]	119/121	119/121 Count	119/121 Variability [%]	IonScore	Exp Value	Charge	MH+ [Da]	ΔM [ppm]	RT [min]	# Missed Cleavages
	High	dIPNENELQFQIk	1	1	1	P62944	N-Term(iTRAQ8plex); K13(iTRAQ8plex)	0	0.811101	1		2.04159	1											1.40531	1					33.9	0.00342199	3	2196.21	-1.37589	19.8751	0
	High	lDIMIR	2	1	1	P62944	N-Term(iTRAQ8plex)	0	1.31326	2	1.91375	1.35179	2	3.53429	1.08409	2	23.227	0.820918	2	11.668	1.03439	2	1.41897	1.10715	2	21.2771	1.01732	2	4.4144	29.31	0.00351659	2	1064.64	-1.7319	9.1138	0
	High	dcEDPNPLIR	1	1	1	P62944	N-Term(iTRAQ8plex); C2(Carbamidomethyl)	0	1.06947	1		1.2063	1		1.27918	1		1.02166	1		0.935387	1		1.11961	1		1.00772	1		24.89	0.00454075	2	1532.76	-6.67111	14.5556	0
Q9JHU5	Arfaptin-1 OS=Rattus norvegicus GN=Arfip1 PE=2 SV=1 - [ARFP1_RAT]	58.3421	3.01	1	1	1	2	1.08738	2	7.53084	0.866971	2	2.59589	0.843293	2	12.3792	0.91188	2	14.3154	1.10522	2	2.33037	1.07063	2	10.1474	0.848072	2	4.3663	366	40.754	6.81494
	A2	Sequence	# PSMs	# Proteins	# Protein Groups	Protein Group Accessions	Modifications	ΔCn	(115+116)/(113+114)	(115+116)/(113+114) Count	(115+116)/(113+114) Variability [%]	(117+118)/(113+114)	(117+118)/(113+114) Count	(117+118)/(113+114) Variability [%]	(119+121)/(113+114)	(119+121)/(113+114) Count	(119+121)/(113+114) Variability [%]	114/113	114/113 Count	114/113 Variability [%]	115/116	115/116 Count	115/116 Variability [%]	117/118	117/118 Count	117/118 Variability [%]	119/121	119/121 Count	119/121 Variability [%]	IonScore	Exp Value	Charge	MH+ [Da]	ΔM [ppm]	RT [min]	# Missed Cleavages
	High	tDLEELNLGPR	2	1	1	Q9JHU5	N-Term(iTRAQ8plex)	0	1.08738	2	7.53084	0.866971	2	2.59589	0.843293	2	12.3792	0.91188	2	14.3154	1.10522	2	2.33037	1.07063	2	10.1474	0.848072	2	4.3663	39.4	0.000528151	2	1560.86	1.42818	21.3422	0
P20673	Argininosuccinate lyase OS=Rattus norvegicus GN=Asl PE=2 SV=1 - [ARLY_RAT]	82.8655	6.51	1	3	3	5	1.62142	5	21.3653	2.20613	5	22.0521	1.9706	5	29.5435	1.00616	4	1.09269	1.14704	5	9.49225	0.996137	5	2.68822	1.01473	5	7.68199	461	51.5173	6.40479
	A2	Sequence	# PSMs	# Proteins	# Protein Groups	Protein Group Accessions	Modifications	ΔCn	(115+116)/(113+114)	(115+116)/(113+114) Count	(115+116)/(113+114) Variability [%]	(117+118)/(113+114)	(117+118)/(113+114) Count	(117+118)/(113+114) Variability [%]	(119+121)/(113+114)	(119+121)/(113+114) Count	(119+121)/(113+114) Variability [%]	114/113	114/113 Count	114/113 Variability [%]	115/116	115/116 Count	115/116 Variability [%]	117/118	117/118 Count	117/118 Variability [%]	119/121	119/121 Count	119/121 Variability [%]	IonScore	Exp Value	Charge	MH+ [Da]	ΔM [ppm]	RT [min]	# Missed Cleavages
	High	nDQVVTDLR	2	1	1	P20673	N-Term(iTRAQ8plex)	0	1.81365	2	16.7266	2.50298	2	18.8816	2.17254	2	14.5398	1.00616	2	0.827618	1.17351	2	7.24431	1.00962	2	4.68379	1.05892	2	6.32561	39.79	0.000577248	2	1363.74	-8.58042	14.2692	0
	High	aEMQQILQGLDk	1	1	1	P20673	N-Term(iTRAQ8plex); K12(iTRAQ8plex)	0	2.14075	1		2.69073	1		2.44743	1					0.666449	1		0.996137	1		1.4359	1		31.49	0.00578306	3	1982.12	1.58559	16.1802	0
	High	nPDSLELIR	2	1	1	P20673	N-Term(iTRAQ8plex)	0	1.40796	2	0.199143	1.96293	2	4.4758	1.64121	2	8.18346	1.0019	2	1.98643	1.18427	2	4.73814	1.02535	2	6.59243	0.9807	2	2.61344	29.03	0.00712648	2	1360.77	-1.22649	18.9847	0
P14173	Aromatic-L-amino-acid decarboxylase OS=Rattus norvegicus GN=Ddc PE=1 SV=1 - [DDC_RAT]	402.895	16.25	1	5	5	16	0.693288	16	18.4212	0.387027	16	23.5713	0.212518	16	19.8635	0.997679	16	16.068	1.12277	16	9.28166	1.10392	16	7.65088	0.838959	14	17.3899	480	54.0184	6.96143
	A2	Sequence	# PSMs	# Proteins	# Protein Groups	Protein Group Accessions	Modifications	ΔCn	(115+116)/(113+114)	(115+116)/(113+114) Count	(115+116)/(113+114) Variability [%]	(117+118)/(113+114)	(117+118)/(113+114) Count	(117+118)/(113+114) Variability [%]	(119+121)/(113+114)	(119+121)/(113+114) Count	(119+121)/(113+114) Variability [%]	114/113	114/113 Count	114/113 Variability [%]	115/116	115/116 Count	115/116 Variability [%]	117/118	117/118 Count	117/118 Variability [%]	119/121	119/121 Count	119/121 Variability [%]	IonScore	Exp Value	Charge	MH+ [Da]	ΔM [ppm]	RT [min]	# Missed Cleavages
	High	aGEGGGVIQGSASEATLVALLAAR	1	1	1	P14173	N-Term(iTRAQ8plex)	0	0.796264	1		0.548753	1		0.161777	1		1.16418	1		1.03718	1		1.5387	1					91.07	8.71515e-09	2	2502.37	-4.16609	6.44472	0
	High	aLIPTTAPQEPETYEDIIR	3	1	1	P14173	N-Term(iTRAQ8plex)	0	0.611281	3	5.02972	0.282725	3	18.815	0.182953	3	15.8044	1.13408	3	16.8737	0.786048	3	7.02909	0.907882	3	15.4225	0.48331	2	38.173	70.24	8.09033e-07	2	2461.31	-2.10316	12.4207	0
	High	tDLTEAFNMDPVYLR	1	1	1	P14173	N-Term(iTRAQ8plex)	0	0.719929	1		0.465266	1		0.211092	1		0.893411	1		1.11778	1		1.04208	1		0.734933	1		61.75	3.77614e-06	2	2089.07	6.82972	11.4312	0
	High	mLELPEAFLAGR	7	1	1	P14173	N-Term(iTRAQ8plex)	0	0.64327	7	10.7754	0.35252	7	14.3528	0.213954	7	10.4889	0.947284	7	23.5682	1.13216	7	4.34613	1.14438	7	3.79791	0.880454	7	13.0057	35.31	0.00150166	2	1650.91	-4.29847	9.47661	0
	High	mLELPEAFLAGR	2	1	1	P14173	N-Term(iTRAQ8plex); M1(Oxidation)	0	0.752775	2	10.953	0.396721	2	1.75631	0.259611	2	13.692	1.05062	2	5.06479	1.40588	2	27.9624	1.10392	2	0.793206	0.870312	2	20.5454	35.31	0.00125138	2	1666.91	-3.11068	8.90559	0
	High	aGLIGGVk	2	1	1	P14173	N-Term(iTRAQ8plex); K8(iTRAQ8plex)	0	0.793056	2	2.06208	0.666213	2	9.14336	0.491835	2	10.7559	0.895754	2	2.08043	1.16535	2	6.20555	1.05921	2	10.9371	0.902981	2	9.72305	25.07	0.010891	2	1322.86	-1.47753	11.3243	0
P49088	Asparagine synthetase [glutamine-hydrolyzing] OS=Rattus norvegicus GN=Asns PE=2 SV=3 - [ASNS_RAT]	288.022	13.9	1	7	7	13	1.0615	13	6.61344	1.06572	13	10.1753	0.80076	13	5.11475	0.943124	12	11.9202	1.03339	11	13.7057	1.16009	12	10.3959	0.872928	12	15.0109	561	64.2055	6.45557
	A2	Sequence	# PSMs	# Proteins	# Protein Groups	Protein Group Accessions	Modifications	ΔCn	(115+116)/(113+114)	(115+116)/(113+114) Count	(115+116)/(113+114) Variability [%]	(117+118)/(113+114)	(117+118)/(113+114) Count	(117+118)/(113+114) Variability [%]	(119+121)/(113+114)	(119+121)/(113+114) Count	(119+121)/(113+114) Variability [%]	114/113	114/113 Count	114/113 Variability [%]	115/116	115/116 Count	115/116 Variability [%]	117/118	117/118 Count	117/118 Variability [%]	119/121	119/121 Count	119/121 Variability [%]	IonScore	Exp Value	Charge	MH+ [Da]	ΔM [ppm]	RT [min]	# Missed Cleavages
	High	eAFSDGITSVk	1	1	1	P49088	N-Term(iTRAQ8plex); K11(iTRAQ8plex)	0	1.0615	1		1.33249	1		0.808995	1		0.799504	1		1.13299	1		1.3417	1		0.778456	1		48.56	9.05552e-05	2	1761.99	1.58165	16.5573	0
	High	eTFEDSNLLPk	3	1	1	P49088	N-Term(iTRAQ8plex); K11(iTRAQ8plex)	0	1.18685	3	10.2342	1.13209	3	0.898669	0.828848	3	5.78142	0.983858	3	5.30906	1.22818	2	4.47562	1.16582	3	2.79106	1.01673	3	13.8979	48.43	0.000109815	2	1901.05	1.47883	20.0751	0
	High	lAVVDPLFGMQPIR	1	1	1	P49088	N-Term(iTRAQ8plex)	0	1.08971	1		1.11742	1		0.873443	1		1.07204	1		1.38752	1		1.15439	1		0.807137	1		42	0.000359646	2	1860.06	-3.80867	9.40725	0
	High	eLYLFDVLR	4	1	1	P49088	N-Term(iTRAQ8plex)	0	1.02667	4	2.00801	1.07536	4	5.20853	0.764613	4	6.7206	0.931751	4	4.96202	0.990179	4	10.9275	1.1678	4	10.3959	0.823647	4	2.89003	39.97	0.000619263	2	1471.84	-6.55361	15.2996	0
	High	aLTEDGFLAVcSEAk	1	1	1	P49088	N-Term(iTRAQ8plex); C11(Carbamidomethyl); K15(iTRAQ8plex)	0	1.08497	1		1.06572	1		0.647345	1														36.72	0.00139393	3	2219.17	-5.43816	10.8178	0
	High	lFPGFEIETVk	1	1	1	P49088	N-Term(iTRAQ8plex); K11(iTRAQ8plex)	0	0.956404	1		0.956351	1		1.02359	1		0.950351	1		1.03339	1		0.884679	1		0.928646	1		34.5	0.00216436	3	1888.11	4.09839	7.25828	0
	High	vPFLDHR	2	1	1	P49088	N-Term(iTRAQ8plex)	0	1.02157	2	9.14417	0.897226	2	15.0206	0.794364	2	1.18905	0.914882	2	22.6877	0.955994	2	6.36696	1.06573	2	37.4598	0.948119	2	32.0962	33.74	0.00247261	3	1187.68	-2.02087	8.53551	0
P00507	Aspartate aminotransferase, mitochondrial OS=Rattus norvegicus GN=Got2 PE=1 SV=2 - [AATM_RAT]	314.443	6.28	1	2	2	18	1.12557	18	8.39054	1.12209	18	5.47075	1.16779	18	8.7438	0.927124	18	5.3396	1.09673	18	4.90768	1.03062	18	8.79419	1.03587	18	5.45628	430	47.2841	8.99756
	A2	Sequence	# PSMs	# Proteins	# Protein Groups	Protein Group Accessions	Modifications	ΔCn	(115+116)/(113+114)	(115+116)/(113+114) Count	(115+116)/(113+114) Variability [%]	(117+118)/(113+114)	(117+118)/(113+114) Count	(117+118)/(113+114) Variability [%]	(119+121)/(113+114)	(119+121)/(113+114) Count	(119+121)/(113+114) Variability [%]	114/113	114/113 Count	114/113 Variability [%]	115/116	115/116 Count	115/116 Variability [%]	117/118	117/118 Count	117/118 Variability [%]	119/121	119/121 Count	119/121 Variability [%]	IonScore	Exp Value	Charge	MH+ [Da]	ΔM [ppm]	RT [min]	# Missed Cleavages
	High	aSAELALGENSEVLk	1	1	1	P00507	N-Term(iTRAQ8plex); K15(iTRAQ8plex)	0	1.05826	1		1.09884	1		0.982486	1		0.875384	1		1.51857	1		1.1506	1		1.08012	1		55.88	2.38859e-05	3	2139.21	0.620127	12.9411	0
	High	iAATILTSPDLR	17	1	1	P00507	N-Term(iTRAQ8plex)	0	1.1296	17	8.2274	1.12285	17	5.5404	1.17235	17	7.62747	0.929369	17	5.39683	1.09654	17	4.40306	1.02652	17	8.77054	1.03013	17	4.57381	48.06	9.76967e-05	2	1574.95	5.34219	6.08815	0
P15178	Aspartyl-tRNA synthetase, cytoplasmic OS=Rattus norvegicus GN=Dars PE=2 SV=1 - [SYDC_RAT]	152.098	6.39	1	3	3	6	1.07796	6	5.66189	1.0565	6	6.08647	1.16317	6	11.4613	0.935323	6	12.9394	1.04224	6	7.89098	1.1209	6	6.72691	1.01853	6	5.03557	501	57.0902	6.44287
	A2	Sequence	# PSMs	# Proteins	# Protein Groups	Protein Group Accessions	Modifications	ΔCn	(115+116)/(113+114)	(115+116)/(113+114) Count	(115+116)/(113+114) Variability [%]	(117+118)/(113+114)	(117+118)/(113+114) Count	(117+118)/(113+114) Variability [%]	(119+121)/(113+114)	(119+121)/(113+114) Count	(119+121)/(113+114) Variability [%]	114/113	114/113 Count	114/113 Variability [%]	115/116	115/116 Count	115/116 Variability [%]	117/118	117/118 Count	117/118 Variability [%]	119/121	119/121 Count	119/121 Variability [%]	IonScore	Exp Value	Charge	MH+ [Da]	ΔM [ppm]	RT [min]	# Missed Cleavages
	High	eIVDAAEDYAk	1	1	1	P15178	N-Term(iTRAQ8plex); K11(iTRAQ8plex)	0	1.0353	1		0.955462	1		1.10699	1		0.843144	1		1.05613	1		1.24159	1		0.965281	1		59.07	9.47679e-06	2	1832	5.92612	15.7597	0
	High	eSIIDVEGIVR	2	1	1	P15178	N-Term(iTRAQ8plex)	0	1.03996	2	2.21396	1.03599	2	3.69206	1.16115	2	11.9232	1.01	2	8.01662	1.01092	2	12.3682	1.1209	2	1.79153	1.01384	2	5.03557	45.35	0.00014733	2	1533.87	-3.06813	14.9131	0
	High	gEEILSGAQR	3	1	1	P15178	N-Term(iTRAQ8plex)	0	1.1174	3	2.22148	1.09691	3	6.35492	1.2222	3	7.39799	0.914211	3	7.01267	1.02854	3	6.00288	1.05637	3	13.4995	1.03396	3	4.46031	36.15	0.00120117	2	1363.74	-6.708	10.3079	0
Q9ER24	Ataxin-10 OS=Rattus norvegicus GN=Atxn10 PE=1 SV=1 - [ATX10_RAT]	109.145	8.63	1	3	3	3	1.15308	2	1.161	1.3447	2	20.6794	0.875668	2	14.7838	0.868686	2	34.1451	0.773336	2	20.0821	1.16831	2	12.8288	1.34829	2	36.1142	475	53.6925	5.14795
	A2	Sequence	# PSMs	# Proteins	# Protein Groups	Protein Group Accessions	Modifications	ΔCn	(115+116)/(113+114)	(115+116)/(113+114) Count	(115+116)/(113+114) Variability [%]	(117+118)/(113+114)	(117+118)/(113+114) Count	(117+118)/(113+114) Variability [%]	(119+121)/(113+114)	(119+121)/(113+114) Count	(119+121)/(113+114) Variability [%]	114/113	114/113 Count	114/113 Variability [%]	115/116	115/116 Count	115/116 Variability [%]	117/118	117/118 Count	117/118 Variability [%]	119/121	119/121 Count	119/121 Variability [%]	IonScore	Exp Value	Charge	MH+ [Da]	ΔM [ppm]	RT [min]	# Missed Cleavages
	High	nLTEDNSQNQDFIAk	1	1	1	Q9ER24	N-Term(iTRAQ8plex); K15(iTRAQ8plex)	0	1.16215	1		1.17134	1		0.79299	1		0.694363	1		0.884329	1		1.07184	1		1.06468	1		54.69	1.93586e-05	2	2345.2	-8.2605	14.209	0
	High	mEEQGLADASLLk	1	1	1	Q9ER24	N-Term(iTRAQ8plex); K13(iTRAQ8plex)	0																						50.83	7.14523e-05	3	2013.11	-4.42263	11.1363	0
	High	dSTNIFSPSDSLk	1	1	1	Q9ER24	N-Term(iTRAQ8plex); K13(iTRAQ8plex)	0	1.14409	1		1.54372	1		0.966967	1		1.08677	1		0.676274	1		1.27345	1		1.70745	1		43.19	0.000405375	3	2019.08	-2.63387	20.0214	0
Q0ZHH6	Atlastin-3 OS=Rattus norvegicus GN=Atl3 PE=2 SV=2 - [ATLA3_RAT]	125.2	2.59	1	1	1	2	1.60426	2	9.09585	1.65497	2	11.0389	1.72387	2	8.49031	0.951475	2	1.09722	0.795108	2	0.541247	1.17506	2	7.00075	0.953491	2	0.0957362	541	60.5475	5.79541
	A2	Sequence	# PSMs	# Proteins	# Protein Groups	Protein Group Accessions	Modifications	ΔCn	(115+116)/(113+114)	(115+116)/(113+114) Count	(115+116)/(113+114) Variability [%]	(117+118)/(113+114)	(117+118)/(113+114) Count	(117+118)/(113+114) Variability [%]	(119+121)/(113+114)	(119+121)/(113+114) Count	(119+121)/(113+114) Variability [%]	114/113	114/113 Count	114/113 Variability [%]	115/116	115/116 Count	115/116 Variability [%]	117/118	117/118 Count	117/118 Variability [%]	119/121	119/121 Count	119/121 Variability [%]	IonScore	Exp Value	Charge	MH+ [Da]	ΔM [ppm]	RT [min]	# Missed Cleavages
	High	dLDVVVVSVAGAFR	2	1	1	Q0ZHH6	N-Term(iTRAQ8plex)	0	1.60426	2	9.09585	1.65497	2	11.0389	1.72387	2	8.49031	0.951475	2	1.09722	0.795108	2	0.541247	1.17506	2	7.00075	0.953491	2	0.0957362	76.59	1.43629e-07	2	1750.99	-6.56202	13.8219	0
P15999	ATP synthase subunit alpha, mitochondrial OS=Rattus norvegicus GN=Atp5a1 PE=1 SV=2 - [ATPA_RAT]	1183.5	25.5	1	11	11	39	1.0529	37	13.3079	1.11812	37	11.5149	1.16849	37	9.0789	0.980335	37	12.5726	1.05562	36	19.5066	1.10334	37	12.8045	0.975558	36	15.366	553	59.7166	9.18799
	A2	Sequence	# PSMs	# Proteins	# Protein Groups	Protein Group Accessions	Modifications	ΔCn	(115+116)/(113+114)	(115+116)/(113+114) Count	(115+116)/(113+114) Variability [%]	(117+118)/(113+114)	(117+118)/(113+114) Count	(117+118)/(113+114) Variability [%]	(119+121)/(113+114)	(119+121)/(113+114) Count	(119+121)/(113+114) Variability [%]	114/113	114/113 Count	114/113 Variability [%]	115/116	115/116 Count	115/116 Variability [%]	117/118	117/118 Count	117/118 Variability [%]	119/121	119/121 Count	119/121 Variability [%]	IonScore	Exp Value	Charge	MH+ [Da]	ΔM [ppm]	RT [min]	# Missed Cleavages
	High	eVAAFAQFGSDLDAATQQLLSR	1	1	1	P15999	N-Term(iTRAQ8plex)	0	1.04228	1		0.924128	1		1.47578	1		1.24043	1		0.914365	1		1.15354	1		0.915578	1		109.5	1.06031e-10	2	2642.38	4.06876	8.14998	0
	High	eIVTNFLAGFEP	5	1	1	P15999	N-Term(iTRAQ8plex)	0	1.11625	5	14.3654	1.11812	5	9.50565	1.12421	5	16.1246	1.06648	5	37.8007	0.824705	5	26.2004	1.1339	5	24.8084	0.978368	5	15.922	93.93	1.73968e-09	2	1640.87	-5.61407	16.728	0
	High	tGAIVDVPVGDELLGR	4	1	1	P15999	N-Term(iTRAQ8plex)	0	0.996434	4	4.40447	1.01118	4	2.328	1.16425	4	4.68354	1.03477	4	3.62259	0.951067	4	6.39274	1.00657	4	13.0301	1.03272	4	8.246	76.43	1.86558e-07	2	1915.07	-2.88066	15.8414	0
	High	iLGADTSVDLEETGR	2	1	1	P15999	N-Term(iTRAQ8plex)	0	0.975073	2	9.20409	0.934756	2	6.33332	0.973673	2	27.9337	1.1218	2	4.39607	1.02846	2	20.1938	1.26693	2	18.7486	0.91968	2	6.41842	65.52	1.66923e-06	2	1879.99	-1.62255	21.9254	0
	High	tGTAEMSSILEER	3	1	1	P15999	N-Term(iTRAQ8plex)	0	1.18524	3	2.80188	1.35058	3	11.5193	1.33416	3	0.477716	0.940946	3	9.22169	1.22806	3	9.76699	1.0316	3	4.10773	1.07318	3	3.7721	58.11	5.02208e-06	2	1727.88	-1.4486	18.3828	0
	High	vVDALGNAIDGk	6	1	1	P15999	N-Term(iTRAQ8plex); K12(iTRAQ8plex)	0	0.833676	5	1.09467	1.11599	5	5.23351	1.07255	5	10.5393	0.930889	5	4.40204	1.07363	5	16.6189	1.31299	5	15.8143	0.844124	4	0.668795	55.67	1.53126e-05	2	1780.04	-1.09343	19.6012	0
	High	gMSLNLEPDNVGVVVFGNDk	3	1	1	P15999	N-Term(iTRAQ8plex); K20(iTRAQ8plex)	0	0.861621	2	31.9777	1.4161	2	15.2062	1.10356	2	7.23452	1.07091	2	22.7327	1.27131	1		1.15708	2	51.9773	0.66942	2	22.8028	52.46	6.9808e-05	3	2712.47	8.09814	9.81198	0
	High	vLSIGDGIAR	10	1	1	P15999	N-Term(iTRAQ8plex)	0	1.14188	10	6.78744	1.17952	10	3.66797	1.19587	10	3.46364	0.947182	10	12.5567	1.12418	10	9.48878	1.0173	10	9.87567	1.01002	10	13.0329	42.75	0.000318531	2	1304.78	-3.46783	7.57516	0
	High	eLIIGDR	3	1	1	P15999	N-Term(iTRAQ8plex)	0	1.0529	3	0.646706	1.03483	3	9.00415	1.18127	3	18.0302	0.945708	3	5.80657	0.94828	3	6.51997	1.29286	3	26.9561	0.963167	3	6.85552	31.2	0.00443768	2	1119.68	8.04694	13.5393	0
	High	fNDGTDEk	1	1	1	P15999	N-Term(iTRAQ8plex); K8(iTRAQ8plex)	0	0.930826	1		1.10837	1		1.24369	1		0.94635	1		1.03071	1		1.0519	1		1.0979	1		26.96	0.00493362	2	1533.79	-8.40145	13.7699	0
	High	lTELLk	1	1	1	P15999	N-Term(iTRAQ8plex); K6(iTRAQ8plex)	0	0.78634	1		0.977279	1		0.965809	1		0.998984	1		1.2051	1		1.02791	1		1.05598	1		23.68	0.00964234	2	1324.86	-2.76935	8.3536	0
P19511	ATP synthase subunit b, mitochondrial OS=Rattus norvegicus GN=Atp5f1 PE=1 SV=1 - [AT5F1_RAT]	63.059	8.98	1	2	2	3	0.831545	3	25.0913	1.1725	3	9.35644	1.02223	3	1.35106	0.916041	3	10.5526	1.21196	2	5.61572	0.960817	3	6.87652	0.910732	3	9.74575	256	28.8505	9.36377
	A2	Sequence	# PSMs	# Proteins	# Protein Groups	Protein Group Accessions	Modifications	ΔCn	(115+116)/(113+114)	(115+116)/(113+114) Count	(115+116)/(113+114) Variability [%]	(117+118)/(113+114)	(117+118)/(113+114) Count	(117+118)/(113+114) Variability [%]	(119+121)/(113+114)	(119+121)/(113+114) Count	(119+121)/(113+114) Variability [%]	114/113	114/113 Count	114/113 Variability [%]	115/116	115/116 Count	115/116 Variability [%]	117/118	117/118 Count	117/118 Variability [%]	119/121	119/121 Count	119/121 Variability [%]	IonScore	Exp Value	Charge	MH+ [Da]	ΔM [ppm]	RT [min]	# Missed Cleavages
	High	lGLIPEEFFQFLYPk	1	1	1	P19511	N-Term(iTRAQ8plex); K15(iTRAQ8plex)	0	0.581924	1		1.1725	1		1.03159	1		0.983424	1					0.91732	1		1.06529	1		40.68	0.000812313	3	2449.4	0.333237	6.92756	0
	High	iAQLEEIk	2	1	1	P19511	N-Term(iTRAQ8plex); K8(iTRAQ8plex)	0	0.903807	2	12.4019	1.07634	2	22.2935	0.891181	2	20.5532	0.781747	2	23.8319	1.21196	2	5.61572	1.02349	2	9.38912	0.881354	2	4.86424	33.12	0.00353458	2	1551.95	-1.68446	7.76694	0
P10719	ATP synthase subunit beta, mitochondrial OS=Rattus norvegicus GN=Atp5b PE=1 SV=2 - [ATPB_RAT]	2592.85	27.03	1	10	10	74	1.03889	70	8.23212	1.19962	70	11.5445	1.27416	70	13.7997	0.983875	69	11.5446	1.09035	69	7.81153	1.03243	69	10.7506	1.08017	70	6.93512	529	56.3185	5.33838
	A2	Sequence	# PSMs	# Proteins	# Protein Groups	Protein Group Accessions	Modifications	ΔCn	(115+116)/(113+114)	(115+116)/(113+114) Count	(115+116)/(113+114) Variability [%]	(117+118)/(113+114)	(117+118)/(113+114) Count	(117+118)/(113+114) Variability [%]	(119+121)/(113+114)	(119+121)/(113+114) Count	(119+121)/(113+114) Variability [%]	114/113	114/113 Count	114/113 Variability [%]	115/116	115/116 Count	115/116 Variability [%]	117/118	117/118 Count	117/118 Variability [%]	119/121	119/121 Count	119/121 Variability [%]	IonScore	Exp Value	Charge	MH+ [Da]	ΔM [ppm]	RT [min]	# Missed Cleavages
	High	aIAELGIYPAVDPLDSTSR	4	1	1	P10719	N-Term(iTRAQ8plex)	0	0.949351	4	3.18852	1.02266	4	1.12816	1.1868	4	13.7243	0.934461	4	6.60493	0.981273	4	19.234	1.17218	3	4.2757	1.04669	4	10.697	90.13	6.98767e-09	2	2292.25	5.58633	11.6517	0
	High	dQEGQDVLLFIDNIFR	5	1	1	P10719	N-Term(iTRAQ8plex)	0	0.937371	4	2.81308	1.03818	4	7.51957	1.20147	4	8.2722	1.03411	4	9.8563	0.941248	4	6.79471	1.09062	4	8.0269	1.05287	4	17.1098	88.87	8.95054e-09	2	2226.18	3.76228	9.15611	0
	High	tVLIMELInNVAk	4	1	1	P10719	N-Term(iTRAQ8plex); N9(Deamidated); K13(iTRAQ8plex)	0	0.896302	1		1.30926	1		0.974573	1		0.98914	1		1.2097	1		1.03676	1		1.13699	1		76.7	1.37899e-07	2	2067.22	-7.44264	11.3922	0
	High	fTQAGSEVSALLGR	31	1	1	P10719	N-Term(iTRAQ8plex)	0	1.07292	31	6.05821	1.22559	31	6.00945	1.39467	31	6.50821	0.922645	31	9.12734	1.10948	31	5.22515	0.98243	31	6.5086	1.09088	31	4.19128	71.82	4.34054e-07	2	1739.97	6.9437	0.18474	0
	High	lVLEVAQHLGESTVR	8	1	1	P10719	N-Term(iTRAQ8plex)	0	1.04003	8	7.13975	1.18258	8	7.85597	1.21615	8	7.72953	0.94949	8	9.84804	1.02978	8	13.0194	1.13882	8	6.20459	1.15786	8	17.9058	70.58	6.99987e-07	2	1955.11	-6.14591	12.4373	0
	High	vALTGLTVAEYFR	3	1	1	P10719	N-Term(iTRAQ8plex)	0	1.03962	3	7.24974	1.1009	3	2.31485	1.09919	3	1.88665	1.02013	3	1.20606	1.1789	3	1.91742	0.960418	3	1.16725	1.09834	3	8.2765	58.38	8.56746e-06	2	1743.99	-3.58969	12.5591	0
	High	iMNVIGEPIDER	5	1	1	P10719	N-Term(iTRAQ8plex)	0	1.08345	5	10.8369	1.22278	5	7.21412	1.33965	5	9.26367	1.02724	4	13.9718	1.07796	5	10.6766	1.04409	5	12.3017	1.06835	5	11.9074	57.19	1.2414e-05	3	1689.92	1.18994	20.2557	0
	High	fLSQPFQVAEVFTGHMGk	1	1	1	P10719	N-Term(iTRAQ8plex); K18(iTRAQ8plex)	0	1.0067	1		1.69838	1		1.316	1		1.08317	1		1.16906	1		1.18299	1		1.20325	1		55.62	2.6182e-05	3	2631.41	-4.70492	8.56182	0
	High	tIAMDGTEGLVR	10	1	1	P10719	N-Term(iTRAQ8plex)	0	1.01159	10	7.24168	1.24715	10	9.6827	1.16902	10	9.96979	1.07988	10	2.76086	1.0893	10	2.6966	1.09895	10	4.60078	1.05516	10	2.09488	53.12	2.26701e-05	2	1566.84	-1.16239	13.5872	0
	High	tVLIMELINNVAk	1	1	1	P10719	N-Term(iTRAQ8plex); K13(iTRAQ8plex)	0	0.427796	1		1.57128	1		1.16409	1		1.06232	1					1.04241	1		0.674291	1		42.49	0.000293092	3	2066.25	0.319637	5.38585	0
	High	iGLFGGAGVGk	2	1	1	P10719	N-Term(iTRAQ8plex); K11(iTRAQ8plex)	0	0.940302	2	4.44838	1.19174	2	20.2749	0.972135	2	4.82413	0.937468	2	9.51565	1.2896	2	14.7646	1.25745	2	5.96329	0.95465	2	0.806445	40.21	0.000366827	2	1583.97	-4.18261	7.0853	0
P31399	ATP synthase subunit d, mitochondrial OS=Rattus norvegicus GN=Atp5h PE=1 SV=3 - [ATP5H_RAT]	40.62	9.94	1	1	1	1	0.737947	1		1.46243	1		1.00532	1		1.73982	1		1.70229	1		1.63078	1		0.679823	1		161	18.7516	6.59521
	A2	Sequence	# PSMs	# Proteins	# Protein Groups	Protein Group Accessions	Modifications	ΔCn	(115+116)/(113+114)	(115+116)/(113+114) Count	(115+116)/(113+114) Variability [%]	(117+118)/(113+114)	(117+118)/(113+114) Count	(117+118)/(113+114) Variability [%]	(119+121)/(113+114)	(119+121)/(113+114) Count	(119+121)/(113+114) Variability [%]	114/113	114/113 Count	114/113 Variability [%]	115/116	115/116 Count	115/116 Variability [%]	117/118	117/118 Count	117/118 Variability [%]	119/121	119/121 Count	119/121 Variability [%]	IonScore	Exp Value	Charge	MH+ [Da]	ΔM [ppm]	RT [min]	# Missed Cleavages
	High	tIDWVSFVEIMPQNQk	1	1	1	P31399	N-Term(iTRAQ8plex); K16(iTRAQ8plex)	0	0.737947	1		1.46243	1		1.00532	1		1.73982	1		1.70229	1		1.63078	1		0.679823	1		40.62	0.000758592	3	2543.36	-9.14002	15.172	0
P35434	ATP synthase subunit delta, mitochondrial OS=Rattus norvegicus GN=Atp5d PE=1 SV=2 - [ATPD_RAT]	405.687	13.69	1	2	2	10	0.932635	9	14.2701	1.2468	9	5.05467	1.19834	9	7.62781	0.972878	9	9.43074	0.999516	9	8.80907	1.16287	9	6.3002	0.942999	9	11.1312	168	17.5842	5.23682
	A2	Sequence	# PSMs	# Proteins	# Protein Groups	Protein Group Accessions	Modifications	ΔCn	(115+116)/(113+114)	(115+116)/(113+114) Count	(115+116)/(113+114) Variability [%]	(117+118)/(113+114)	(117+118)/(113+114) Count	(117+118)/(113+114) Variability [%]	(119+121)/(113+114)	(119+121)/(113+114) Count	(119+121)/(113+114) Variability [%]	114/113	114/113 Count	114/113 Variability [%]	115/116	115/116 Count	115/116 Variability [%]	117/118	117/118 Count	117/118 Variability [%]	119/121	119/121 Count	119/121 Variability [%]	IonScore	Exp Value	Charge	MH+ [Da]	ΔM [ppm]	RT [min]	# Missed Cleavages
	High	aQSELSGAADEAAR	7	1	1	P35434	N-Term(iTRAQ8plex)	0	0.913606	6	8.38075	1.22574	6	5.21372	1.17577	6	7.97945	0.958381	6	10.8028	0.997364	6	14.597	1.18002	6	4.76072	0.911842	6	9.90683	87.54	4.75734e-09	3	1679.84	-7.33792	15.5119	0
	High	iEANEALVk	3	1	1	P35434	N-Term(iTRAQ8plex); K9(iTRAQ8plex)	0	1.11858	3	3.13795	1.25831	3	1.94466	1.21683	3	5.35	1.03644	3	0.0271253	1.06058	3	15.3519	1.14399	3	6.56551	0.942999	3	11.1312	43.75	0.000406937	2	1594.97	5.35029	9.78102	0
P29419	ATP synthase subunit e, mitochondrial OS=Rattus norvegicus GN=Atp5i PE=1 SV=3 - [ATP5I_RAT]	81.5583	16.9	1	1	1	2																						71	8.24948	9.34912
	A2	Sequence	# PSMs	# Proteins	# Protein Groups	Protein Group Accessions	Modifications	ΔCn	(115+116)/(113+114)	(115+116)/(113+114) Count	(115+116)/(113+114) Variability [%]	(117+118)/(113+114)	(117+118)/(113+114) Count	(117+118)/(113+114) Variability [%]	(119+121)/(113+114)	(119+121)/(113+114) Count	(119+121)/(113+114) Variability [%]	114/113	114/113 Count	114/113 Variability [%]	115/116	115/116 Count	115/116 Variability [%]	117/118	117/118 Count	117/118 Variability [%]	119/121	119/121 Count	119/121 Variability [%]	IonScore	Exp Value	Charge	MH+ [Da]	ΔM [ppm]	RT [min]	# Missed Cleavages
	High	eLAEAEDVSIFk	2	1	1	P29419	N-Term(iTRAQ8plex); K12(iTRAQ8plex)	0																						53.97	3.30715e-05	3	1959.08	-3.46821	15.1464	0
P35435	ATP synthase subunit gamma, mitochondrial OS=Rattus norvegicus GN=Atp5c1 PE=1 SV=2 - [ATPG_RAT]	148.949	4.76	1	1	1	2	1.10481	2	6.81124	0.988258	2	8.17959	1.24263	2	7.60555	1.007	2	51.1963	0.861107	2	10.1596	1.16018	2	19.384	1.12401	2	41.0089	273	30.1717	8.83643
	A2	Sequence	# PSMs	# Proteins	# Protein Groups	Protein Group Accessions	Modifications	ΔCn	(115+116)/(113+114)	(115+116)/(113+114) Count	(115+116)/(113+114) Variability [%]	(117+118)/(113+114)	(117+118)/(113+114) Count	(117+118)/(113+114) Variability [%]	(119+121)/(113+114)	(119+121)/(113+114) Count	(119+121)/(113+114) Variability [%]	114/113	114/113 Count	114/113 Variability [%]	115/116	115/116 Count	115/116 Variability [%]	117/118	117/118 Count	117/118 Variability [%]	119/121	119/121 Count	119/121 Variability [%]	IonScore	Exp Value	Charge	MH+ [Da]	ΔM [ppm]	RT [min]	# Missed Cleavages
	High	eLIEIISGAAALD	2	1	1	P35435	N-Term(iTRAQ8plex)	0	1.10481	2	6.81124	0.988258	2	8.17959	1.24263	2	7.60555	1.007	2	51.1963	0.861107	2	10.1596	1.16018	2	19.384	1.12401	2	41.0089	86.92	1.40233e-08	2	1618.92	-3.23087	17.7628	0
P21571	ATP synthase-coupling factor 6, mitochondrial OS=Rattus norvegicus GN=Atp5j PE=1 SV=1 - [ATP5J_RAT]	31.28	6.48	1	1	1	1	0.940592	1		1.58434	1		1.07205	1		0.964253	1		1.11485	1		1.11033	1		0.939454	1		108	12.4866	9.43701
	A2	Sequence	# PSMs	# Proteins	# Protein Groups	Protein Group Accessions	Modifications	ΔCn	(115+116)/(113+114)	(115+116)/(113+114) Count	(115+116)/(113+114) Variability [%]	(117+118)/(113+114)	(117+118)/(113+114) Count	(117+118)/(113+114) Variability [%]	(119+121)/(113+114)	(119+121)/(113+114) Count	(119+121)/(113+114) Variability [%]	114/113	114/113 Count	114/113 Variability [%]	115/116	115/116 Count	115/116 Variability [%]	117/118	117/118 Count	117/118 Variability [%]	119/121	119/121 Count	119/121 Variability [%]	IonScore	Exp Value	Charge	MH+ [Da]	ΔM [ppm]	RT [min]	# Missed Cleavages
	High	eLDPVQk	1	1	1	P21571	N-Term(iTRAQ8plex); K7(iTRAQ8plex)	0	0.940592	1		1.58434	1		1.07205	1		0.964253	1		1.11485	1		1.11033	1		0.939454	1		31.28	0.00204801	2	1436.84	-9.47353	11.0676	0
P16970	ATP-binding cassette sub-family D member 3 OS=Rattus norvegicus GN=Abcd3 PE=1 SV=3 - [ABCD3_RAT]	51.36	1.67	1	1	1	1	1.19583	1		1.27007	1		1.14675	1		0.929384	1		0.919244	1		0.90104	1		1.07061	1		659	75.2672	9.24658
	A2	Sequence	# PSMs	# Proteins	# Protein Groups	Protein Group Accessions	Modifications	ΔCn	(115+116)/(113+114)	(115+116)/(113+114) Count	(115+116)/(113+114) Variability [%]	(117+118)/(113+114)	(117+118)/(113+114) Count	(117+118)/(113+114) Variability [%]	(119+121)/(113+114)	(119+121)/(113+114) Count	(119+121)/(113+114) Variability [%]	114/113	114/113 Count	114/113 Variability [%]	115/116	115/116 Count	115/116 Variability [%]	117/118	117/118 Count	117/118 Variability [%]	119/121	119/121 Count	119/121 Variability [%]	IonScore	Exp Value	Charge	MH+ [Da]	ΔM [ppm]	RT [min]	# Missed Cleavages
	High	kITEDTVEFGS	1	1	1	P16970	N-Term(iTRAQ8plex); K1(iTRAQ8plex)	0	1.19583	1		1.27007	1		1.14675	1		0.929384	1		0.919244	1		0.90104	1		1.07061	1		51.36	4.89863e-05	2	1834	-4.34416	14.277	1
P16638	ATP-citrate synthase OS=Rattus norvegicus GN=Acly PE=1 SV=1 - [ACLY_RAT]	973.687	9.64	1	8	8	27	1.50674	25	11.7274	1.81151	23	14.5084	1.32386	22	9.11346	0.918969	20	12.6274	1.04188	25	13.4726	1.04902	22	16.7748	1.06187	21	8.88345	1100	120.559	7.34229
	A2	Sequence	# PSMs	# Proteins	# Protein Groups	Protein Group Accessions	Modifications	ΔCn	(115+116)/(113+114)	(115+116)/(113+114) Count	(115+116)/(113+114) Variability [%]	(117+118)/(113+114)	(117+118)/(113+114) Count	(117+118)/(113+114) Variability [%]	(119+121)/(113+114)	(119+121)/(113+114) Count	(119+121)/(113+114) Variability [%]	114/113	114/113 Count	114/113 Variability [%]	115/116	115/116 Count	115/116 Variability [%]	117/118	117/118 Count	117/118 Variability [%]	119/121	119/121 Count	119/121 Variability [%]	IonScore	Exp Value	Charge	MH+ [Da]	ΔM [ppm]	RT [min]	# Missed Cleavages
	High	mIVVLGEIGGTEEYk	2	1	1	P16638	N-Term(iTRAQ8plex); K15(iTRAQ8plex)	0	1.24943	2	27.7919	2.2534	2	43.2957	0.666525	2	146.995	0.606176	1		1.53244	2	22.3048	1.18313	2	10.6013	1.14606	1		75.92	2.25156e-07	3	2246.24	-8.84501	14.2785	0
	High	tTDGVYEGVAIGGDR	1	1	1	P16638	N-Term(iTRAQ8plex)	0	1.3232	1		1.64832	1		1.32872	1		1.22707	1		0.915035	1		1.32955	1		1.08988	1		74.12	1.12305e-07	2	1813.92	-3.71446	14.8837	0
	High	tIAIIAEGIPEALTR	14	1	1	P16638	N-Term(iTRAQ8plex)	0	1.56779	12	8.35198	1.6593	10	13.5127	1.27255	10	9.07853	0.950041	10	8.26367	1.06914	12	9.86181	0.9485	10	9.99583	1.06187	11	4.95434	70.17	5.962e-07	2	1872.1	-7.99025	13.6203	0
	High	vDATADYIck	3	1	1	P16638	N-Term(iTRAQ8plex); C9(Carbamidomethyl); K10(iTRAQ8plex)	0	1.475	3	8.94932	2.20312	3	4.19529	1.38772	3	0.362893	0.911695	3	0.943432	0.987258	3	46.4146	1.13288	3	26.1134	0.909201	3	23.0166	54.11	1.99897e-05	2	1763.96	6.24698	15.0257	0
	High	qHFPATPLLDYALEVEk	1	1	1	P16638	N-Term(iTRAQ8plex); K17(iTRAQ8plex)	0	1.38945	1		1.66803	1		1.17249	1		0.909948	1		0.90257	1		1.0914	1		0.878992	1		51.63	7.17987e-05	3	2579.41	-7.49469	4.51837	0
	High	aVQGMLDFDYVcSR	2	1	1	P16638	N-Term(iTRAQ8plex); C12(Carbamidomethyl)	0	1.86412	2	30.3304	1.27587	2	55.6847	1.39368	1		1.39731	1		0.808921	2	39.0655	1.1927	1		0.926936	1		50.05	1.87825e-05	2	1964.95	0.183406	18.8402	0
	High	wGDIEFPPPFGR	3	1	1	P16638	N-Term(iTRAQ8plex)	0	1.53965	3	3.20486	1.9832	3	7.53483	1.37976	3	3.46753	0.962488	2	8.84513	1.0313	3	6.92363	1.05781	3	4.09846	1.11381	2	5.54798	47.25	6.78114e-05	2	1721.88	-7.18349	6.13314	0
	High	eILIPVFk	1	1	1	P16638	N-Term(iTRAQ8plex); K8(iTRAQ8plex)	0	1.01784	1		1.27759	1		1.01423	1		0.821231	1		1.21076	1		1.17974	1		1.00023	1		23.09	0.0112909	2	1567.02	5.70639	6.86015	0
Q5QJC9	BAG family molecular chaperone regulator 5 OS=Rattus norvegicus GN=Bag5 PE=1 SV=1 - [BAG5_RAT]	73.4528	4.25	1	2	2	3	1.1453	3	2.55839	1.03678	3	8.08801	1.06999	3	6.21714	1.06218	3	6.88215	1.01213	3	16.4397	1.12728	3	4.01323	0.912367	3	4.66066	447	50.9985	6.16357
	A2	Sequence	# PSMs	# Proteins	# Protein Groups	Protein Group Accessions	Modifications	ΔCn	(115+116)/(113+114)	(115+116)/(113+114) Count	(115+116)/(113+114) Variability [%]	(117+118)/(113+114)	(117+118)/(113+114) Count	(117+118)/(113+114) Variability [%]	(119+121)/(113+114)	(119+121)/(113+114) Count	(119+121)/(113+114) Variability [%]	114/113	114/113 Count	114/113 Variability [%]	115/116	115/116 Count	115/116 Variability [%]	117/118	117/118 Count	117/118 Variability [%]	119/121	119/121 Count	119/121 Variability [%]	IonScore	Exp Value	Charge	MH+ [Da]	ΔM [ppm]	RT [min]	# Missed Cleavages
	High	icAVQEIIEDcVR	1	1	1	Q5QJC9	N-Term(iTRAQ8plex); C2(Carbamidomethyl); C11(Carbamidomethyl)	0	1.1453	1		1.12187	1		1.06999	1		1.06218	1		1.01213	1		1.12728	1		0.884148	1		56.84	6.83147e-06	2	1908.97	-6.23406	12.4502	0
	High	lqEIqR	2	1	1	Q5QJC9	N-Term(iTRAQ8plex); Q2(Deamidated); Q5(Deamidated)	0	1.12546	2	5.15244	1.00893	2	4.03906	1.05592	2	8.18755	1.00369	2	15.3612	1.00074	2	18.1542	1.09158	2	8.80052	0.999241	2	13.5463	26.76	0.00590416	2	1092.62	-0.639624	19.359	0
P23562	Band 3 anion transport protein OS=Rattus norvegicus GN=Slc4a1 PE=2 SV=3 - [B3AT_RAT]	36.3864	0.54	3	1	1	2																						927	103.107	5.41455
	A2	Sequence	# PSMs	# Proteins	# Protein Groups	Protein Group Accessions	Modifications	ΔCn	(115+116)/(113+114)	(115+116)/(113+114) Count	(115+116)/(113+114) Variability [%]	(117+118)/(113+114)	(117+118)/(113+114) Count	(117+118)/(113+114) Variability [%]	(119+121)/(113+114)	(119+121)/(113+114) Count	(119+121)/(113+114) Variability [%]	114/113	114/113 Count	114/113 Variability [%]	115/116	115/116 Count	115/116 Variability [%]	117/118	117/118 Count	117/118 Variability [%]	119/121	119/121 Count	119/121 Variability [%]	IonScore	Exp Value	Charge	MH+ [Da]	ΔM [ppm]	RT [min]	# Missed Cleavages
	High	dELLR	2	3	1	P23562	N-Term(iTRAQ8plex)	0																						29.32	0.010584	2	949.554	-8.6912	12.1265	0
Q9R1T1	Barrier-to-autointegration factor OS=Rattus norvegicus GN=Banf1 PE=1 SV=1 - [BAF_RAT]	43.45	7.87	1	1	1	1	0.976397	1		0.398031	1		0.583688	1		0.66265	1		0.864088	1		0.706836	1		0.994044	1		89	10.038	6.0874
	A2	Sequence	# PSMs	# Proteins	# Protein Groups	Protein Group Accessions	Modifications	ΔCn	(115+116)/(113+114)	(115+116)/(113+114) Count	(115+116)/(113+114) Variability [%]	(117+118)/(113+114)	(117+118)/(113+114) Count	(117+118)/(113+114) Variability [%]	(119+121)/(113+114)	(119+121)/(113+114) Count	(119+121)/(113+114) Variability [%]	114/113	114/113 Count	114/113 Variability [%]	115/116	115/116 Count	115/116 Variability [%]	117/118	117/118 Count	117/118 Variability [%]	119/121	119/121 Count	119/121 Variability [%]	IonScore	Exp Value	Charge	MH+ [Da]	ΔM [ppm]	RT [min]	# Missed Cleavages
	High	eWcDAFL	1	1	1	Q9R1T1	N-Term(iTRAQ8plex); C3(Carbamidomethyl)	0	0.976397	1		0.398031	1		0.583688	1		0.66265	1		0.864088	1		0.706836	1		0.994044	1		43.45	4.50786e-05	2	1244.59	0.880679	23.899	0
Q6P7P5	Basic leucine zipper and W2 domain-containing protein 1 OS=Rattus norvegicus GN=Bzw1 PE=2 SV=1 - [BZW1_RAT]	30.27	1.43	2	1	1	2	1.11183	2	7.14256	1.34235	2	4.09745	1.15528	2	3.12188	0.646449	2	8.25712	1.0032	2	1.2866	1.00072	2	9.34994	1.02514	2	8.3119	419	48.0127	5.92236
	A2	Sequence	# PSMs	# Proteins	# Protein Groups	Protein Group Accessions	Modifications	ΔCn	(115+116)/(113+114)	(115+116)/(113+114) Count	(115+116)/(113+114) Variability [%]	(117+118)/(113+114)	(117+118)/(113+114) Count	(117+118)/(113+114) Variability [%]	(119+121)/(113+114)	(119+121)/(113+114) Count	(119+121)/(113+114) Variability [%]	114/113	114/113 Count	114/113 Variability [%]	115/116	115/116 Count	115/116 Variability [%]	117/118	117/118 Count	117/118 Variability [%]	119/121	119/121 Count	119/121 Variability [%]	IonScore	Exp Value	Charge	MH+ [Da]	ΔM [ppm]	RT [min]	# Missed Cleavages
	High	lLLFLk	2	2	1	Q6P7P5	N-Term(iTRAQ8plex); K6(iTRAQ8plex)	0	1.11183	2	7.14256	1.34235	2	4.09745	1.15528	2	3.12188	0.646449	2	8.25712	1.0032	2	1.2866	1.00072	2	9.34994	1.02514	2	8.3119	21.64	0.00683864	2	1354.92	-9.07078	6.55822	0
P26453	Basigin OS=Rattus norvegicus GN=Bsg PE=1 SV=2 - [BASI_RAT]	121.251	5.93	1	2	2	5	0.746643	5	5.18013	0.62745	5	1.38959	0.701531	5	8.04696	0.987232	5	0.567377	1.04177	5	5.00626	0.999885	5	10.7602	0.926497	5	4.35247	388	42.4092	5.40186
	A2	Sequence	# PSMs	# Proteins	# Protein Groups	Protein Group Accessions	Modifications	ΔCn	(115+116)/(113+114)	(115+116)/(113+114) Count	(115+116)/(113+114) Variability [%]	(117+118)/(113+114)	(117+118)/(113+114) Count	(117+118)/(113+114) Variability [%]	(119+121)/(113+114)	(119+121)/(113+114) Count	(119+121)/(113+114) Variability [%]	114/113	114/113 Count	114/113 Variability [%]	115/116	115/116 Count	115/116 Variability [%]	117/118	117/118 Count	117/118 Variability [%]	119/121	119/121 Count	119/121 Variability [%]	IonScore	Exp Value	Charge	MH+ [Da]	ΔM [ppm]	RT [min]	# Missed Cleavages
	High	sGEYScIFLPEPVGR	2	1	1	P26453	N-Term(iTRAQ8plex); C6(Carbamidomethyl)	0	0.775859	2	5.69546	0.651738	2	4.50976	0.699144	2	0.505213	1.01788	2	4.94983	1.06914	2	3.84544	0.956304	2	17.5556	0.952419	2	4.09281	52.79	1.86736e-05	2	2015.02	-1.37926	11.9994	0
	High	yTVDADDR	3	1	1	P26453	N-Term(iTRAQ8plex)	0	0.721023	3	4.04264	0.621597	3	1.38959	0.740594	3	0.402987	0.987232	3	0.567377	1.02083	3	8.02702	0.999885	3	5.9462	0.92538	3	4.5317	28.21	0.0015065	2	1258.62	-4.81729	15.685	0
Q8VIJ5	Bifunctional protein NCOAT OS=Rattus norvegicus GN=Mgea5 PE=1 SV=1 - [NCOAT_RAT]	34.5	0.98	1	1	1	1	1.24249	1		1.77303	1		1.58273	1		0.99408	1		1.1057	1		1.0616	1		0.933429	1		916	102.852	4.91943
	A2	Sequence	# PSMs	# Proteins	# Protein Groups	Protein Group Accessions	Modifications	ΔCn	(115+116)/(113+114)	(115+116)/(113+114) Count	(115+116)/(113+114) Variability [%]	(117+118)/(113+114)	(117+118)/(113+114) Count	(117+118)/(113+114) Variability [%]	(119+121)/(113+114)	(119+121)/(113+114) Count	(119+121)/(113+114) Variability [%]	114/113	114/113 Count	114/113 Variability [%]	115/116	115/116 Count	115/116 Variability [%]	117/118	117/118 Count	117/118 Variability [%]	119/121	119/121 Count	119/121 Variability [%]	IonScore	Exp Value	Charge	MH+ [Da]	ΔM [ppm]	RT [min]	# Missed Cleavages
	High	eSQAALEER	1	1	1	Q8VIJ5	N-Term(iTRAQ8plex)	0	1.24249	1		1.77303	1		1.58273	1		0.99408	1		1.1057	1		1.0616	1		0.933429	1		34.5	0.000957996	2	1336.7	-2.60638	14.4444	0
O35567	Bifunctional purine biosynthesis protein PURH OS=Rattus norvegicus GN=Atic PE=1 SV=2 - [PUR9_RAT]	163.487	6.93	1	3	3	5	1.28161	5	7.658	1.41599	5	5.5069	1.14922	5	6.88377	1.07978	5	12.1713	0.966533	5	18.283	1.08305	5	7.13154	1.03536	5	12.808	592	64.1682	7.13721
	A2	Sequence	# PSMs	# Proteins	# Protein Groups	Protein Group Accessions	Modifications	ΔCn	(115+116)/(113+114)	(115+116)/(113+114) Count	(115+116)/(113+114) Variability [%]	(117+118)/(113+114)	(117+118)/(113+114) Count	(117+118)/(113+114) Variability [%]	(119+121)/(113+114)	(119+121)/(113+114) Count	(119+121)/(113+114) Variability [%]	114/113	114/113 Count	114/113 Variability [%]	115/116	115/116 Count	115/116 Variability [%]	117/118	117/118 Count	117/118 Variability [%]	119/121	119/121 Count	119/121 Variability [%]	IonScore	Exp Value	Charge	MH+ [Da]	ΔM [ppm]	RT [min]	# Missed Cleavages
	High	dVSELTGFPEMLGGR	2	1	1	O35567	N-Term(iTRAQ8plex)	0	1.18904	2	11.1497	1.32966	2	5.60362	1.10831	2	4.84513	1.17537	2	6.75703	1.08094	2	35.7912	1.08437	2	0.18029	1.13958	2	5.96208	72.01	3.49376e-07	2	1911.99	7.70744	10.4895	0
	High	aLFEEVPELLTEAEk	1	1	1	O35567	N-Term(iTRAQ8plex); K15(iTRAQ8plex)	0	1.66688	1		1.63634	1		1.90512	1		0.829958	1		0.638869	1		1.67146	1		0.875977	1		46.24	0.000217481	3	2326.28	-7.89964	14.0495	0
	High	nIPEDAADMAR	1	1	1	O35567	N-Term(iTRAQ8plex)	0	1.34945	1		1.46953	1		1.20377	1		0.994981	1		0.966533	1		1.01853	1		1.03536	1		36.83	0.00022824	2	1506.74	-8.07659	14.0757	0
	High	nIPEDAADmAR	1	1	1	O35567	N-Term(iTRAQ8plex); M9(Oxidation)	0	1.27324	1		1.41599	1		1.14922	1		1.07978	1		1.00076	1		1.03225	1		0.950005	1		24.57	0.00348313	2	1522.74	-5.21351	14.3003	0
P46844	Biliverdin reductase A OS=Rattus norvegicus GN=Blvra PE=1 SV=1 - [BIEA_RAT]	95.8378	6.1	1	2	2	5	1.16615	5	11.9034	1.26733	5	5.69585	1.25351	5	4.65942	1.02224	5	2.41885	0.952154	5	3.40281	1.07073	5	6.07047	0.863527	5	4.0797	295	33.5445	6.12549
	A2	Sequence	# PSMs	# Proteins	# Protein Groups	Protein Group Accessions	Modifications	ΔCn	(115+116)/(113+114)	(115+116)/(113+114) Count	(115+116)/(113+114) Variability [%]	(117+118)/(113+114)	(117+118)/(113+114) Count	(117+118)/(113+114) Variability [%]	(119+121)/(113+114)	(119+121)/(113+114) Count	(119+121)/(113+114) Variability [%]	114/113	114/113 Count	114/113 Variability [%]	115/116	115/116 Count	115/116 Variability [%]	117/118	117/118 Count	117/118 Variability [%]	119/121	119/121 Count	119/121 Variability [%]	IonScore	Exp Value	Charge	MH+ [Da]	ΔM [ppm]	RT [min]	# Missed Cleavages
	High	eLGSLDEVR	2	1	1	P46844	N-Term(iTRAQ8plex)	0	1.12148	2	5.79512	1.3029	2	4.10536	1.23882	2	6.41093	1.00786	2	0.317942	0.978436	2	4.03854	1.03934	2	4.41333	0.921102	2	9.59139	37.26	0.000930262	2	1321.73	-0.402166	14.7692	0
	High	qISLEDALR	3	1	1	P46844	N-Term(iTRAQ8plex)	0	1.26328	3	0.277297	1.22024	3	11.3409	1.25351	3	0.654724	1.0514	3	1.90998	0.950279	3	3.69536	1.11544	3	6.49582	0.863374	3	4.05332	34.5	0.00180955	2	1348.77	-0.784879	16.0465	0
Q5BJR4	BNIP2 motif-containing molecule at the C-terminal region 1 OS=Rattus norvegicus GN=Bmcc1 PE=2 SV=1 - [BMCC1_RAT]	26.33	3.11	1	1	1	1	1.7274	1		2.01862	1		2.21228	1		0.809901	1		0.955942	1		1.09547	1		0.935397	1		322	36.9563	4.99561
	A2	Sequence	# PSMs	# Proteins	# Protein Groups	Protein Group Accessions	Modifications	ΔCn	(115+116)/(113+114)	(115+116)/(113+114) Count	(115+116)/(113+114) Variability [%]	(117+118)/(113+114)	(117+118)/(113+114) Count	(117+118)/(113+114) Variability [%]	(119+121)/(113+114)	(119+121)/(113+114) Count	(119+121)/(113+114) Variability [%]	114/113	114/113 Count	114/113 Variability [%]	115/116	115/116 Count	115/116 Variability [%]	117/118	117/118 Count	117/118 Variability [%]	119/121	119/121 Count	119/121 Variability [%]	IonScore	Exp Value	Charge	MH+ [Da]	ΔM [ppm]	RT [min]	# Missed Cleavages
	High	tVVIGEQEQR	1	1	1	Q5BJR4	N-Term(iTRAQ8plex)	0	1.7274	1		2.01862	1		2.21228	1		0.809901	1		0.955942	1		1.09547	1		0.935397	1		26.33	0.0115241	2	1462.8	-8.87526	10.5212	0
Q05175	Brain acid soluble protein 1 OS=Rattus norvegicus GN=Basp1 PE=1 SV=2 - [BASP1_RAT]	276.671	18.64	1	3	3	7	1.10355	7	10.0953	1.65506	7	15.0684	1.40228	7	4.84369	1.0223	7	22.229	1.14246	7	7.1956	1.05455	7	3.02174	0.78725	7	4.0983	220	21.7774	4.51318
	A2	Sequence	# PSMs	# Proteins	# Protein Groups	Protein Group Accessions	Modifications	ΔCn	(115+116)/(113+114)	(115+116)/(113+114) Count	(115+116)/(113+114) Variability [%]	(117+118)/(113+114)	(117+118)/(113+114) Count	(117+118)/(113+114) Variability [%]	(119+121)/(113+114)	(119+121)/(113+114) Count	(119+121)/(113+114) Variability [%]	114/113	114/113 Count	114/113 Variability [%]	115/116	115/116 Count	115/116 Variability [%]	117/118	117/118 Count	117/118 Variability [%]	119/121	119/121 Count	119/121 Variability [%]	IonScore	Exp Value	Charge	MH+ [Da]	ΔM [ppm]	RT [min]	# Missed Cleavages
	High	aEGAGTEEEGTQk	2	1	1	Q05175	N-Term(iTRAQ8plex); K13(iTRAQ8plex)	0	1.06946	2	6.73676	1.5735	2	7.50247	1.62279	2	11.12	1.05922	2	5.26432	1.11989	2	4.23115	1.04506	2	3.78533	0.801248	2	2.61357	63.53	1.8188e-06	2	1914.98	-5.17563	15.6143	0
	High	eTPAASEAPSSAAk	3	1	1	Q05175	N-Term(iTRAQ8plex); K14(iTRAQ8plex)	0	1.1811	3	0.315819	1.74718	3	2.37395	1.40228	3	0.592463	0.881549	3	22.5606	1.02298	3	6.95723	1.05455	3	1.55507	0.767508	3	2.03651	63.21	2.50703e-06	2	1925.04	-3.05136	10.3343	0
	High	eSEPQAAADATEVk	2	1	1	Q05175	N-Term(iTRAQ8plex); K14(iTRAQ8plex)	0	0.851963	2	35.7387	1.3554	2	2.17274	1.36786	2	1.15637	1.21583	2	50.83	1.35859	2	26.1184	1.05132	2	3.47608	0.836945	2	4.98186	47.74	8.16097e-05	3	2054.07	-6.93583	20.2246	0
Q6MGA9	Bromodomain-containing protein 2 OS=Rattus norvegicus GN=Brd2 PE=2 SV=1 - [BRD2_RAT]	58.1754	1.25	1	1	1	2	0.895536	2	2.87268	0.633876	2	18.7137	0.712661	2	21.4373	0.964093	2	2.27193	1.08345	2	2.74807	1.06493	2	0.837861	0.96043	2	8.04887	798	87.9965	9.12939
	A2	Sequence	# PSMs	# Proteins	# Protein Groups	Protein Group Accessions	Modifications	ΔCn	(115+116)/(113+114)	(115+116)/(113+114) Count	(115+116)/(113+114) Variability [%]	(117+118)/(113+114)	(117+118)/(113+114) Count	(117+118)/(113+114) Variability [%]	(119+121)/(113+114)	(119+121)/(113+114) Count	(119+121)/(113+114) Variability [%]	114/113	114/113 Count	114/113 Variability [%]	115/116	115/116 Count	115/116 Variability [%]	117/118	117/118 Count	117/118 Variability [%]	119/121	119/121 Count	119/121 Variability [%]	IonScore	Exp Value	Charge	MH+ [Da]	ΔM [ppm]	RT [min]	# Missed Cleavages
	High	dAQEFAADVR	2	1	1	Q6MGA9	N-Term(iTRAQ8plex)	0	0.895536	2	2.87268	0.633876	2	18.7137	0.712661	2	21.4373	0.964093	2	2.27193	1.08345	2	2.74807	1.06493	2	0.837861	0.96043	2	8.04887	45.18	6.67456e-05	2	1425.72	-6.00368	14.4287	0
Q80WL2	Bystin OS=Rattus norvegicus GN=Bysl PE=2 SV=3 - [BYST_RAT]	36.4614	1.83	1	1	1	2	1.0324	2	2.4051	0.59609	2	5.99503	0.745446	2	2.48592	0.907065	2	1.10244	1.03111	2	0.209215	0.894378	2	6.53644	0.893097	2	0.383771	436	49.9803	8.04541
	A2	Sequence	# PSMs	# Proteins	# Protein Groups	Protein Group Accessions	Modifications	ΔCn	(115+116)/(113+114)	(115+116)/(113+114) Count	(115+116)/(113+114) Variability [%]	(117+118)/(113+114)	(117+118)/(113+114) Count	(117+118)/(113+114) Variability [%]	(119+121)/(113+114)	(119+121)/(113+114) Count	(119+121)/(113+114) Variability [%]	114/113	114/113 Count	114/113 Variability [%]	115/116	115/116 Count	115/116 Variability [%]	117/118	117/118 Count	117/118 Variability [%]	119/121	119/121 Count	119/121 Variability [%]	IonScore	Exp Value	Charge	MH+ [Da]	ΔM [ppm]	RT [min]	# Missed Cleavages
	High	eALLELLR	2	1	1	Q80WL2	N-Term(iTRAQ8plex)	0	1.0324	2	2.4051	0.59609	2	5.99503	0.745446	2	2.48592	0.907065	2	1.10244	1.03111	2	0.209215	0.894378	2	6.53644	0.893097	2	0.383771	28.14	0.00529443	2	1260.78	-6.12894	6.30922	0
P27653	C-1-tetrahydrofolate synthase, cytoplasmic OS=Rattus norvegicus GN=Mthfd1 PE=1 SV=3 - [C1TC_RAT]	53.5299	2.46	1	2	2	2	1.42939	2	33.9972	0.772649	1		0.598277	2	13.7689	1.0598	2	13.2766	1.03434	2	13.3219	1.11659	1		0.972181	1		935	100.932	7.41553
	A2	Sequence	# PSMs	# Proteins	# Protein Groups	Protein Group Accessions	Modifications	ΔCn	(115+116)/(113+114)	(115+116)/(113+114) Count	(115+116)/(113+114) Variability [%]	(117+118)/(113+114)	(117+118)/(113+114) Count	(117+118)/(113+114) Variability [%]	(119+121)/(113+114)	(119+121)/(113+114) Count	(119+121)/(113+114) Variability [%]	114/113	114/113 Count	114/113 Variability [%]	115/116	115/116 Count	115/116 Variability [%]	117/118	117/118 Count	117/118 Variability [%]	119/121	119/121 Count	119/121 Variability [%]	IonScore	Exp Value	Charge	MH+ [Da]	ΔM [ppm]	RT [min]	# Missed Cleavages
	High	iYGADDIELLPEAQNk	1	1	1	P27653	N-Term(iTRAQ8plex); K16(iTRAQ8plex)	0	1.78661	1					0.545454	1		1.15863	1		1.13114	1								42.55	0.000539227	3	2397.31	-2.77193	16.2584	0
	High	vLDTNDR	1	1	1	P27653	N-Term(iTRAQ8plex)	0	1.1436	1		0.772649	1		0.656214	1		0.969396	1		0.945826	1		1.11659	1		0.972181	1		27.98	0.00549312	2	1136.61	-7.35401	13.3957	0
Q63450	Calcium/calmodulin-dependent protein kinase type 1 OS=Rattus norvegicus GN=Camk1 PE=1 SV=2 - [KCC1A_RAT]	29.46	1.6	1	1	1	1	1.59337	1		1.33267	1		1.14195	1		1.07602	1		0.924458	1		0.969474	1		0.903048	1		374	41.6118	5.35107
	A2	Sequence	# PSMs	# Proteins	# Protein Groups	Protein Group Accessions	Modifications	ΔCn	(115+116)/(113+114)	(115+116)/(113+114) Count	(115+116)/(113+114) Variability [%]	(117+118)/(113+114)	(117+118)/(113+114) Count	(117+118)/(113+114) Variability [%]	(119+121)/(113+114)	(119+121)/(113+114) Count	(119+121)/(113+114) Variability [%]	114/113	114/113 Count	114/113 Variability [%]	115/116	115/116 Count	115/116 Variability [%]	117/118	117/118 Count	117/118 Variability [%]	119/121	119/121 Count	119/121 Variability [%]	IonScore	Exp Value	Charge	MH+ [Da]	ΔM [ppm]	RT [min]	# Missed Cleavages
	High	dIYDFR	1	1	1	Q63450	N-Term(iTRAQ8plex)	0	1.59337	1		1.33267	1		1.14195	1		1.07602	1		0.924458	1		0.969474	1		0.903048	1		29.46	0.00118902	2	1132.6	1.08701	17.9799	0
P15791	Calcium/calmodulin-dependent protein kinase type II delta chain OS=Rattus norvegicus GN=Camk2d PE=2 SV=1 - [KCC2D_RAT]	123.943	4.69	1	1	1	2																1.0187	1					533	60.0426	7.26904
	A2	Sequence	# PSMs	# Proteins	# Protein Groups	Protein Group Accessions	Modifications	ΔCn	(115+116)/(113+114)	(115+116)/(113+114) Count	(115+116)/(113+114) Variability [%]	(117+118)/(113+114)	(117+118)/(113+114) Count	(117+118)/(113+114) Variability [%]	(119+121)/(113+114)	(119+121)/(113+114) Count	(119+121)/(113+114) Variability [%]	114/113	114/113 Count	114/113 Variability [%]	115/116	115/116 Count	115/116 Variability [%]	117/118	117/118 Count	117/118 Variability [%]	119/121	119/121 Count	119/121 Variability [%]	IonScore	Exp Value	Charge	MH+ [Da]	ΔM [ppm]	RT [min]	# Missed Cleavages
	High	icDPGLTAFEPEALGNLVEGMDFHR	2	1	1	P15791	N-Term(iTRAQ8plex); C2(Carbamidomethyl)	0																1.0187	1					72.02	2.35522e-07	3	3092.49	-6.59234	13.1546	0
Q9WU49	Calcium-regulated heat stable protein 1 OS=Rattus norvegicus GN=Carhsp1 PE=1 SV=1 - [CHSP1_RAT]	31.67	10.88	1	1	1	1	0.376397	1		1.55395	1		0.653311	1		2.49461	1					0.755224	1					147	15.896	8.20654
	A2	Sequence	# PSMs	# Proteins	# Protein Groups	Protein Group Accessions	Modifications	ΔCn	(115+116)/(113+114)	(115+116)/(113+114) Count	(115+116)/(113+114) Variability [%]	(117+118)/(113+114)	(117+118)/(113+114) Count	(117+118)/(113+114) Variability [%]	(119+121)/(113+114)	(119+121)/(113+114) Count	(119+121)/(113+114) Variability [%]	114/113	114/113 Count	114/113 Variability [%]	115/116	115/116 Count	115/116 Variability [%]	117/118	117/118 Count	117/118 Variability [%]	119/121	119/121 Count	119/121 Variability [%]	IonScore	Exp Value	Charge	MH+ [Da]	ΔM [ppm]	RT [min]	# Missed Cleavages
	High	lQAVEVVITHLAPGTk	1	1	1	Q9WU49	N-Term(iTRAQ8plex); K16(iTRAQ8plex)	0	0.376397	1		1.55395	1		0.653311	1		2.49461	1					0.755224	1					31.67	0.00343789	3	2284.38	-0.13773	8.07092	0
Q6AYK6	Calcyclin-binding protein OS=Rattus norvegicus GN=Cacybp PE=1 SV=1 - [CYBP_RAT]	62.4637	6.55	1	1	2	3	1.08395	2	1.36649	1.02947	2	9.63588	0.859459	2	8.57567	0.905919	2	11.3327	0.989278	2	12.1647	1.17793	2	1.58288	0.970852	2	7.84827	229	26.5247	7.86963
	A2	Sequence	# PSMs	# Proteins	# Protein Groups	Protein Group Accessions	Modifications	ΔCn	(115+116)/(113+114)	(115+116)/(113+114) Count	(115+116)/(113+114) Variability [%]	(117+118)/(113+114)	(117+118)/(113+114) Count	(117+118)/(113+114) Variability [%]	(119+121)/(113+114)	(119+121)/(113+114) Count	(119+121)/(113+114) Variability [%]	114/113	114/113 Count	114/113 Variability [%]	115/116	115/116 Count	115/116 Variability [%]	117/118	117/118 Count	117/118 Variability [%]	119/121	119/121 Count	119/121 Variability [%]	IonScore	Exp Value	Charge	MH+ [Da]	ΔM [ppm]	RT [min]	# Missed Cleavages
	High	wDYLTQVEk	2	1	1	Q6AYK6	N-Term(iTRAQ8plex); K9(iTRAQ8plex)	0	1.08395	2	1.36649	1.02947	2	9.63588	0.859459	2	8.57567	0.905919	2	11.3327	0.989278	2	12.1647	1.17793	2	1.58288	0.970852	2	7.84827	40.29	0.000579952	2	1789.99	-3.29517	10.2241	0
	High	iETELR	1	2	2	P63102;Q6AYK6	N-Term(iTRAQ8plex)	0																						27.78	0.00716916	2	1064.62	-7.72886	10.1346	0
P62161	Calmodulin OS=Rattus norvegicus GN=Calm1 PE=1 SV=2 - [CALM_RAT]	388.512	6.04	2	1	1	15	1.25304	15	6.00538	1.60575	15	5.93974	1.03473	15	11.7368	1.0135	15	10.0233	0.960267	15	10.1934	1.15045	15	9.63487	0.944959	15	4.98245	149	16.8268	4.22119
	A2	Sequence	# PSMs	# Proteins	# Protein Groups	Protein Group Accessions	Modifications	ΔCn	(115+116)/(113+114)	(115+116)/(113+114) Count	(115+116)/(113+114) Variability [%]	(117+118)/(113+114)	(117+118)/(113+114) Count	(117+118)/(113+114) Variability [%]	(119+121)/(113+114)	(119+121)/(113+114) Count	(119+121)/(113+114) Variability [%]	114/113	114/113 Count	114/113 Variability [%]	115/116	115/116 Count	115/116 Variability [%]	117/118	117/118 Count	117/118 Variability [%]	119/121	119/121 Count	119/121 Variability [%]	IonScore	Exp Value	Charge	MH+ [Da]	ΔM [ppm]	RT [min]	# Missed Cleavages
	High	dTDSEEEIR	15	2	1	P62161	N-Term(iTRAQ8plex)	0	1.25304	15	6.00538	1.60575	15	5.93974	1.03473	15	11.7368	1.0135	15	10.0233	0.960267	15	10.1934	1.15045	15	9.63487	0.944959	15	4.98245	43.69	4.48941e-05	2	1397.67	-1.10242	27.7517	0
P35565	Calnexin OS=Rattus norvegicus GN=Canx PE=1 SV=1 - [CALX_RAT]	333.811	12.01	1	6	6	13	1.24997	12	23.9975	1.27719	12	29.9874	1.15178	12	23.6297	0.942408	11	13.5761	1.01052	12	13.108	1.10687	12	11.1348	0.981497	11	5.14242	591	67.2126	4.62744
	A2	Sequence	# PSMs	# Proteins	# Protein Groups	Protein Group Accessions	Modifications	ΔCn	(115+116)/(113+114)	(115+116)/(113+114) Count	(115+116)/(113+114) Variability [%]	(117+118)/(113+114)	(117+118)/(113+114) Count	(117+118)/(113+114) Variability [%]	(119+121)/(113+114)	(119+121)/(113+114) Count	(119+121)/(113+114) Variability [%]	114/113	114/113 Count	114/113 Variability [%]	115/116	115/116 Count	115/116 Variability [%]	117/118	117/118 Count	117/118 Variability [%]	119/121	119/121 Count	119/121 Variability [%]	IonScore	Exp Value	Charge	MH+ [Da]	ΔM [ppm]	RT [min]	# Missed Cleavages
	High	aPVPTGEVYFADSFDR	3	1	1	P35565	N-Term(iTRAQ8plex)	0	1.24803	3	1.41087	1.21991	3	13.6703	1.13627	3	13.6473	0.907808	2	11.5237	1.02759	2	11.3718	1.11007	2	1.20317	0.991398	2	1.4881	80.3	3.17306e-08	3	2075.04	-0.848102	15.1735	0
	High	vVDDWANDGWGLk	2	1	1	P35565	N-Term(iTRAQ8plex); K13(iTRAQ8plex)	0	1.11859	1		1.16997	1		1.08841	1		0.949101	1		0.784516	2	25.6553	1.11086	2	15.6952	0.921626	1		68.28	9.80718e-07	2	2083.11	0.145952	21.8153	0
	High	kIPNPDFFEDLEPFR	3	1	1	P35565	N-Term(iTRAQ8plex); K1(iTRAQ8plex)	0	1.25191	3	4.0129	1.50348	3	10.3474	1.1675	3	15.9768	1.03235	3	5.14964	1.18731	3	5.67914	1.06992	3	5.8151	1.12971	3	3.35848	39.45	0.000947734	2	2472.31	-9.56449	5.68375	1
	High	sDTSTPPSPk	1	1	1	P35565	N-Term(iTRAQ8plex); K10(iTRAQ8plex)	0	0.933528	1		1.20015	1		0.934304	1		1.04069	1		1.18764	1		1.29729	1		0.960355	1		29.15	0.00449989	2	1624.89	-4.83707	9.77881	0
	High	aEEDEILNR	3	1	1	P35565	N-Term(iTRAQ8plex)	0	1.95923	3	7.82703	2.06073	3	3.88318	1.79254	3	5.81922	0.838221	3	6.9592	1.0325	3	8.79119	1.16144	3	16.3719	0.978137	3	5.65205	26.85	0.00485364	2	1392.72	-7.91775	14.3516	0
	High	eIEDPEDR	1	1	1	P35565	N-Term(iTRAQ8plex)	0	0.924071	1		0.876436	1		1.09743	1		0.942408	1		0.734369	1		1.06658	1		1.08731	1		21.09	0.00816938	2	1306.64	-0.273714	0.143232	0
Q64537	Calpain small subunit 1 OS=Rattus norvegicus GN=Capns1 PE=1 SV=3 - [CPNS1_RAT]	56.6275	5.56	1	2	2	3	1.34436	3	6.80526	1.29272	3	12.6336	1.1012	3	2.55912	0.911724	3	1.39296	1.13685	3	9.39445	1.04352	3	14.54	1.01314	3	4.88974	270	28.5519	5.46533
	A2	Sequence	# PSMs	# Proteins	# Protein Groups	Protein Group Accessions	Modifications	ΔCn	(115+116)/(113+114)	(115+116)/(113+114) Count	(115+116)/(113+114) Variability [%]	(117+118)/(113+114)	(117+118)/(113+114) Count	(117+118)/(113+114) Variability [%]	(119+121)/(113+114)	(119+121)/(113+114) Count	(119+121)/(113+114) Variability [%]	114/113	114/113 Count	114/113 Variability [%]	115/116	115/116 Count	115/116 Variability [%]	117/118	117/118 Count	117/118 Variability [%]	119/121	119/121 Count	119/121 Variability [%]	IonScore	Exp Value	Charge	MH+ [Da]	ΔM [ppm]	RT [min]	# Missed Cleavages
	High	tDGFGIDTcR	2	1	1	Q64537	N-Term(iTRAQ8plex); C9(Carbamidomethyl)	0	1.38562	2	11.3146	1.34964	2	19.1452	1.06767	2	4.5876	0.848255	2	10.7285	1.17336	2	4.68949	1.09568	2	7.24146	1.01488	2	5.14496	32.71	0.000534527	2	1445.69	-7.45314	13.7494	0
	High	fDTDR	1	1	1	Q64537	N-Term(iTRAQ8plex)	0	1.34436	1		1.29272	1		1.12037	1		0.92033	1		0.947166	1		0.901641	1		1.01314	1		21.95	0.00989308	2	957.491	-3.07125	12.5067	0
P97571	Calpain-1 catalytic subunit OS=Rattus norvegicus GN=Capn1 PE=1 SV=1 - [CAN1_RAT]	26.36	1.4	1	1	1	1	1.12348	1		1.05992	1		1.1631	1		0.943596	1		0.995106	1		0.924176	1		0.92222	1		713	82.0673	5.65576
	A2	Sequence	# PSMs	# Proteins	# Protein Groups	Protein Group Accessions	Modifications	ΔCn	(115+116)/(113+114)	(115+116)/(113+114) Count	(115+116)/(113+114) Variability [%]	(117+118)/(113+114)	(117+118)/(113+114) Count	(117+118)/(113+114) Variability [%]	(119+121)/(113+114)	(119+121)/(113+114) Count	(119+121)/(113+114) Variability [%]	114/113	114/113 Count	114/113 Variability [%]	115/116	115/116 Count	115/116 Variability [%]	117/118	117/118 Count	117/118 Variability [%]	119/121	119/121 Count	119/121 Variability [%]	IonScore	Exp Value	Charge	MH+ [Da]	ΔM [ppm]	RT [min]	# Missed Cleavages
	High	tnGFSLEScR	1	1	1	P97571	N-Term(iTRAQ8plex); N2(Deamidated); C9(Carbamidomethyl)	0	1.12348	1		1.05992	1		1.1631	1		0.943596	1		0.995106	1		0.924176	1		0.92222	1		26.36	0.00230659	2	1475.7	-9.40887	14.7627	0
Q07009	Calpain-2 catalytic subunit OS=Rattus norvegicus GN=Capn2 PE=1 SV=3 - [CAN2_RAT]	84.1102	2.43	1	2	2	3	1.31014	3	3.2065	1.15595	3	14.8913	1.01395	3	1.61044	1.12532	3	2.64563	0.887211	3	6.14922	1.09867	3	0.621036	0.829735	3	2.94965	700	79.8688	4.95752
	A2	Sequence	# PSMs	# Proteins	# Protein Groups	Protein Group Accessions	Modifications	ΔCn	(115+116)/(113+114)	(115+116)/(113+114) Count	(115+116)/(113+114) Variability [%]	(117+118)/(113+114)	(117+118)/(113+114) Count	(117+118)/(113+114) Variability [%]	(119+121)/(113+114)	(119+121)/(113+114) Count	(119+121)/(113+114) Variability [%]	114/113	114/113 Count	114/113 Variability [%]	115/116	115/116 Count	115/116 Variability [%]	117/118	117/118 Count	117/118 Variability [%]	119/121	119/121 Count	119/121 Variability [%]	IonScore	Exp Value	Charge	MH+ [Da]	ΔM [ppm]	RT [min]	# Missed Cleavages
	High	eAAEGLGSHER	2	1	1	Q07009	N-Term(iTRAQ8plex)	0	1.29606	2	1.60294	1.09963	2	7.415	1.00846	2	0.80518	1.1354	2	1.32264	0.897833	2	7.92035	1.05794	2	5.60535	0.821523	2	1.47459	47.55	3.34005e-05	2	1459.74	-2.59305	8.14391	0
	High	eIDVDR	1	1	1	Q07009	N-Term(iTRAQ8plex)	0	1.58824	1		1.43679	1		1.22484	1		0.846883	1		0.887211	1		1.10328	1		0.934236	1		26.81	0.00812951	2	1050.56	-8.15412	15.0114	0
Q8R4C0	Calpain-5 OS=Rattus norvegicus GN=Capn5 PE=1 SV=1 - [CAN5_RAT]	27.21	0.94	1	1	1	1	1.55919	1		1.81117	1		2.02469	1		1.05275	1		1.05591	1		1.15572	1		1.07786	1		640	73.0186	7.57666
	A2	Sequence	# PSMs	# Proteins	# Protein Groups	Protein Group Accessions	Modifications	ΔCn	(115+116)/(113+114)	(115+116)/(113+114) Count	(115+116)/(113+114) Variability [%]	(117+118)/(113+114)	(117+118)/(113+114) Count	(117+118)/(113+114) Variability [%]	(119+121)/(113+114)	(119+121)/(113+114) Count	(119+121)/(113+114) Variability [%]	114/113	114/113 Count	114/113 Variability [%]	115/116	115/116 Count	115/116 Variability [%]	117/118	117/118 Count	117/118 Variability [%]	119/121	119/121 Count	119/121 Variability [%]	IonScore	Exp Value	Charge	MH+ [Da]	ΔM [ppm]	RT [min]	# Missed Cleavages
	High	lDEPPR	1	1	1	Q8R4C0	N-Term(iTRAQ8plex)	0	1.55919	1		1.81117	1		2.02469	1		1.05275	1		1.05591	1		1.15572	1		1.07786	1		27.21	0.0107411	2	1030.57	-9.53382	10.9213	0
P27321	Calpastatin OS=Rattus norvegicus GN=Cast PE=1 SV=3 - [ICAL_RAT]	76.8199	1.82	1	1	1	2	1.21164	2	4.98869	1.43657	2	3.39866	1.01188	2	7.67818	0.921992	2	0.833854	1.0779	2	3.91595	1.02146	2	2.31665	0.912345	2	20.8132	713	77.2659	5.19873
	A2	Sequence	# PSMs	# Proteins	# Protein Groups	Protein Group Accessions	Modifications	ΔCn	(115+116)/(113+114)	(115+116)/(113+114) Count	(115+116)/(113+114) Variability [%]	(117+118)/(113+114)	(117+118)/(113+114) Count	(117+118)/(113+114) Variability [%]	(119+121)/(113+114)	(119+121)/(113+114) Count	(119+121)/(113+114) Variability [%]	114/113	114/113 Count	114/113 Variability [%]	115/116	115/116 Count	115/116 Variability [%]	117/118	117/118 Count	117/118 Variability [%]	119/121	119/121 Count	119/121 Variability [%]	IonScore	Exp Value	Charge	MH+ [Da]	ΔM [ppm]	RT [min]	# Missed Cleavages
	High	gVVPDDAVETLAR	2	1	1	P27321	N-Term(iTRAQ8plex)	0	1.21164	2	4.98869	1.43657	2	3.39866	1.01188	2	7.67818	0.921992	2	0.833854	1.0779	2	3.91595	1.02146	2	2.31665	0.912345	2	20.8132	55.3	1.68219e-05	2	1645.91	3.69996	23.2453	0
P18418	Calreticulin OS=Rattus norvegicus GN=Calr PE=1 SV=1 - [CALR_RAT]	90.4393	4.81	1	2	2	6	1.21921	6	3.58644	1.34145	6	2.85925	1.2346	6	2.18391	1.00276	6	6.45117	0.983244	6	3.45796	1.09101	6	6.33726	0.935855	6	6.37884	416	47.9658	4.48779
	A2	Sequence	# PSMs	# Proteins	# Protein Groups	Protein Group Accessions	Modifications	ΔCn	(115+116)/(113+114)	(115+116)/(113+114) Count	(115+116)/(113+114) Variability [%]	(117+118)/(113+114)	(117+118)/(113+114) Count	(117+118)/(113+114) Variability [%]	(119+121)/(113+114)	(119+121)/(113+114) Count	(119+121)/(113+114) Variability [%]	114/113	114/113 Count	114/113 Variability [%]	115/116	115/116 Count	115/116 Variability [%]	117/118	117/118 Count	117/118 Variability [%]	119/121	119/121 Count	119/121 Variability [%]	IonScore	Exp Value	Charge	MH+ [Da]	ΔM [ppm]	RT [min]	# Missed Cleavages
	High	eQFLDGDAWTNR	2	1	1	P18418	N-Term(iTRAQ8plex)	0	1.21921	2	0.549179	1.36247	2	1.86876	1.25196	2	1.78447	1.02905	2	0.385077	0.983244	2	0.411663	1.13007	2	2.35745	0.947209	2	10.1813	40.41	0.000177433	2	1755.86	-0.285	21.7582	0
	High	qIDNPDYk	4	1	1	P18418	N-Term(iTRAQ8plex); K8(iTRAQ8plex)	0	1.20136	4	6.78503	1.33252	4	3.6093	1.23128	4	5.66188	0.962602	4	2.76149	0.958798	4	7.19901	1.06216	4	2.78891	0.935855	4	3.51724	27.67	0.00889208	2	1600.86	-9.54745	10.6673	0
O35783	Calumenin OS=Rattus norvegicus GN=Calu PE=1 SV=1 - [CALU_RAT]	47.0967	2.22	1	1	1	3	1.47021	3	0.49139	1.23398	3	1.00042	0.813283	3	6.71319	1.03736	3	4.56585	0.878187	3	0.285939	1.01727	3	7.49812	0.998801	3	8.77284	315	36.9734	4.57666
	A2	Sequence	# PSMs	# Proteins	# Protein Groups	Protein Group Accessions	Modifications	ΔCn	(115+116)/(113+114)	(115+116)/(113+114) Count	(115+116)/(113+114) Variability [%]	(117+118)/(113+114)	(117+118)/(113+114) Count	(117+118)/(113+114) Variability [%]	(119+121)/(113+114)	(119+121)/(113+114) Count	(119+121)/(113+114) Variability [%]	114/113	114/113 Count	114/113 Variability [%]	115/116	115/116 Count	115/116 Variability [%]	117/118	117/118 Count	117/118 Variability [%]	119/121	119/121 Count	119/121 Variability [%]	IonScore	Exp Value	Charge	MH+ [Da]	ΔM [ppm]	RT [min]	# Missed Cleavages
	High	eQFVEFR	3	1	1	O35783	N-Term(iTRAQ8plex)	0	1.47021	3	0.49139	1.23398	3	1.00042	0.813283	3	6.71319	1.03736	3	4.56585	0.878187	3	0.285939	1.01727	3	7.49812	0.998801	3	8.77284	25.92	0.00639646	2	1258.67	-0.367164	14.9642	0
P09456	cAMP-dependent protein kinase type I-alpha regulatory subunit OS=Rattus norvegicus GN=Prkar1a PE=2 SV=2 - [KAP0_RAT]	107.111	3.15	1	2	2	4	1.17341	4	12.106	1.04279	4	3.43203	1.22269	4	10.5964	0.94748	4	0.920073	1.09377	4	9.08507	1.14324	4	9.87118	0.875685	4	5.03325	381	43.068	5.35107
	A2	Sequence	# PSMs	# Proteins	# Protein Groups	Protein Group Accessions	Modifications	ΔCn	(115+116)/(113+114)	(115+116)/(113+114) Count	(115+116)/(113+114) Variability [%]	(117+118)/(113+114)	(117+118)/(113+114) Count	(117+118)/(113+114) Variability [%]	(119+121)/(113+114)	(119+121)/(113+114) Count	(119+121)/(113+114) Variability [%]	114/113	114/113 Count	114/113 Variability [%]	115/116	115/116 Count	115/116 Variability [%]	117/118	117/118 Count	117/118 Variability [%]	119/121	119/121 Count	119/121 Variability [%]	IonScore	Exp Value	Charge	MH+ [Da]	ΔM [ppm]	RT [min]	# Missed Cleavages
	High	rSENEEFVEVGR	2	1	1	P09456	N-Term(iTRAQ8plex)	0	1.0851	2	14.4328	1.09586	2	9.47337	1.12073	2	8.76568	0.863263	2	13.8589	1.16275	2	3.37699	1.23349	2	19.5567	0.924157	2	11.2771	43.04	0.000139046	2	1754.88	-8.08197	10.5646	1
	High	sENEEFVEVGR	2	1	1	P09456	N-Term(iTRAQ8plex)	0	1.2494	2	12.106	1.03342	2	3.43203	1.31301	2	6.41279	0.953378	2	0.912278	0.981658	2	10.3708	1.12992	2	9.87118	0.865256	2	5.03325	38.55	0.000258328	2	1598.78	-7.69715	12.6404	0
P12368	cAMP-dependent protein kinase type II-alpha regulatory subunit OS=Rattus norvegicus GN=Prkar2a PE=1 SV=3 - [KAP2_RAT]	42.44	4.99	1	1	1	1				0.780951	1		1.97844	1											0.843678	1		401	45.5117	4.93213
	A2	Sequence	# PSMs	# Proteins	# Protein Groups	Protein Group Accessions	Modifications	ΔCn	(115+116)/(113+114)	(115+116)/(113+114) Count	(115+116)/(113+114) Variability [%]	(117+118)/(113+114)	(117+118)/(113+114) Count	(117+118)/(113+114) Variability [%]	(119+121)/(113+114)	(119+121)/(113+114) Count	(119+121)/(113+114) Variability [%]	114/113	114/113 Count	114/113 Variability [%]	115/116	115/116 Count	115/116 Variability [%]	117/118	117/118 Count	117/118 Variability [%]	119/121	119/121 Count	119/121 Variability [%]	IonScore	Exp Value	Charge	MH+ [Da]	ΔM [ppm]	RT [min]	# Missed Cleavages
	High	rVSVcAETFNPDEEEDNDPR	1	1	1	P12368	N-Term(iTRAQ8plex); C5(Carbamidomethyl)	0				0.780951	1		1.97844	1											0.843678	1		42.44	5.68814e-05	3	2683.2	-6.51946	13.089	1
O55156	CAP-Gly domain-containing linker protein 2 OS=Rattus norvegicus GN=Clip2 PE=1 SV=1 - [CLIP2_RAT]	58.665	2.1	1	2	2	2	1.46158	2	5.71116	1.57366	2	20.0047	1.65389	2	19.0718	0.970003	2	25.991	0.894428	2	9.43655	1.09652	2	18.5285	0.975217	2	5.42873	1046	115.41	6.50732
	A2	Sequence	# PSMs	# Proteins	# Protein Groups	Protein Group Accessions	Modifications	ΔCn	(115+116)/(113+114)	(115+116)/(113+114) Count	(115+116)/(113+114) Variability [%]	(117+118)/(113+114)	(117+118)/(113+114) Count	(117+118)/(113+114) Variability [%]	(119+121)/(113+114)	(119+121)/(113+114) Count	(119+121)/(113+114) Variability [%]	114/113	114/113 Count	114/113 Variability [%]	115/116	115/116 Count	115/116 Variability [%]	117/118	117/118 Count	117/118 Variability [%]	119/121	119/121 Count	119/121 Variability [%]	IonScore	Exp Value	Charge	MH+ [Da]	ΔM [ppm]	RT [min]	# Missed Cleavages
	High	dALDQAQQVER	1	1	1	O55156	N-Term(iTRAQ8plex)	0	1.51893	1		1.79861	1		1.87878	1		1.15257	1		0.953074	1		0.968723	1		0.940179	1		42.49	0.000143728	2	1576.81	-6.50389	17.9467	0
	High	vLQLEEELSLR	1	1	1	O55156	N-Term(iTRAQ8plex)	0	1.40639	1		1.37685	1		1.45592	1		0.816355	1		0.839391	1		1.24118	1		1.01156	1		34.68	0.00211053	2	1632.94	-6.72551	6.19199	0
Q5M9G3	Caprin-1 OS=Rattus norvegicus GN=Caprin1 PE=1 SV=2 - [CAPR1_RAT]	34.83	0.99	1	1	1	1	1.09046	1		1.11157	1		1.23498	1		1.06026	1		0.999911	1		1.07212	1		0.947931	1		707	78.0729	5.24951
	A2	Sequence	# PSMs	# Proteins	# Protein Groups	Protein Group Accessions	Modifications	ΔCn	(115+116)/(113+114)	(115+116)/(113+114) Count	(115+116)/(113+114) Variability [%]	(117+118)/(113+114)	(117+118)/(113+114) Count	(117+118)/(113+114) Variability [%]	(119+121)/(113+114)	(119+121)/(113+114) Count	(119+121)/(113+114) Variability [%]	114/113	114/113 Count	114/113 Variability [%]	115/116	115/116 Count	115/116 Variability [%]	117/118	117/118 Count	117/118 Variability [%]	119/121	119/121 Count	119/121 Variability [%]	IonScore	Exp Value	Charge	MH+ [Da]	ΔM [ppm]	RT [min]	# Missed Cleavages
	High	lDDYQER	1	1	1	Q5M9G3	N-Term(iTRAQ8plex)	0	1.09046	1		1.11157	1		1.23498	1		1.06026	1		0.999911	1		1.07212	1		0.947931	1		34.83	0.000641261	2	1242.62	-7.29743	16.2636	0
P07756	Carbamoyl-phosphate synthase [ammonia], mitochondrial OS=Rattus norvegicus GN=Cps1 PE=2 SV=1 - [CPSM_RAT]	41.5299	0.53	1	1	1	2	0.963951	2	5.2025	0.663258	2	0.242933	0.526066	2	14.1903	0.943734	2	6.53356	0.966617	2	0.0849879	1.1311	2	3.69193	0.824343	2	3.54986	1500	164.476	6.771
	A2	Sequence	# PSMs	# Proteins	# Protein Groups	Protein Group Accessions	Modifications	ΔCn	(115+116)/(113+114)	(115+116)/(113+114) Count	(115+116)/(113+114) Variability [%]	(117+118)/(113+114)	(117+118)/(113+114) Count	(117+118)/(113+114) Variability [%]	(119+121)/(113+114)	(119+121)/(113+114) Count	(119+121)/(113+114) Variability [%]	114/113	114/113 Count	114/113 Variability [%]	115/116	115/116 Count	115/116 Variability [%]	117/118	117/118 Count	117/118 Variability [%]	119/121	119/121 Count	119/121 Variability [%]	IonScore	Exp Value	Charge	MH+ [Da]	ΔM [ppm]	RT [min]	# Missed Cleavages
	High	eIEYEVVR	2	1	1	P07756	N-Term(iTRAQ8plex)	0	0.963951	2	5.2025	0.663258	2	0.242933	0.526066	2	14.1903	0.943734	2	6.53356	0.966617	2	0.0849879	1.1311	2	3.69193	0.824343	2	3.54986	31.85	0.00218799	2	1340.75	9.48704	13.9646	0
P47727	Carbonyl reductase [NADPH] 1 OS=Rattus norvegicus GN=Cbr1 PE=1 SV=2 - [CBR1_RAT]	47.43	5.42	1	1	1	1	1.15125	1		0.813958	1		0.739199	1		1.02167	1		0.861879	1		1.24155	1		0.960788	1		277	30.5589	8.06006
	A2	Sequence	# PSMs	# Proteins	# Protein Groups	Protein Group Accessions	Modifications	ΔCn	(115+116)/(113+114)	(115+116)/(113+114) Count	(115+116)/(113+114) Variability [%]	(117+118)/(113+114)	(117+118)/(113+114) Count	(117+118)/(113+114) Variability [%]	(119+121)/(113+114)	(119+121)/(113+114) Count	(119+121)/(113+114) Variability [%]	114/113	114/113 Count	114/113 Variability [%]	115/116	115/116 Count	115/116 Variability [%]	117/118	117/118 Count	117/118 Variability [%]	119/121	119/121 Count	119/121 Variability [%]	IonScore	Exp Value	Charge	MH+ [Da]	ΔM [ppm]	RT [min]	# Missed Cleavages
	High	sETITEEELVGLMNk	1	1	1	P47727	N-Term(iTRAQ8plex); K15(iTRAQ8plex)	0	1.15125	1		0.813958	1		0.739199	1		1.02167	1		0.861879	1		1.24155	1		0.960788	1		47.43	0.000157224	3	2301.26	4.27405	9.95206	0
O54858	Carboxypeptidase Z OS=Rattus norvegicus GN=Cpz PE=2 SV=1 - [CBPZ_RAT]	49.278	4.29	1	2	2	2	1.00418	2	11.0579	0.968101	2	10.68	0.883594	2	46.7318	0.844637	2	23.0506	0.788661	2	49.4198	0.851693	2	11.1413	0.928317	1		652	73.0348	8.06006
	A2	Sequence	# PSMs	# Proteins	# Protein Groups	Protein Group Accessions	Modifications	ΔCn	(115+116)/(113+114)	(115+116)/(113+114) Count	(115+116)/(113+114) Variability [%]	(117+118)/(113+114)	(117+118)/(113+114) Count	(117+118)/(113+114) Variability [%]	(119+121)/(113+114)	(119+121)/(113+114) Count	(119+121)/(113+114) Variability [%]	114/113	114/113 Count	114/113 Variability [%]	115/116	115/116 Count	115/116 Variability [%]	117/118	117/118 Count	117/118 Variability [%]	119/121	119/121 Count	119/121 Variability [%]	IonScore	Exp Value	Charge	MH+ [Da]	ΔM [ppm]	RT [min]	# Missed Cleavages
	High	sLDPQGAPAQLDFEPPR	1	1	1	O54858	N-Term(iTRAQ8plex)	0	1.08169	1		1.0402	1		0.654733	1		0.72447	1		0.575385	1		0.79022	1					38.97	0.000722562	2	2142.11	-2.18062	21.2729	0
	High	nFPDLTSEYYR	1	1	1	O54858	N-Term(iTRAQ8plex)	0	0.932219	1		0.901	1		1.19245	1		0.984736	1		1.08099	1		0.917949	1		0.928317	1		27.75	0.00285397	2	1708.85	-0.342559	16.1455	0
P32198	Carnitine O-palmitoyltransferase 1, liver isoform OS=Rattus norvegicus GN=Cpt1a PE=1 SV=2 - [CPT1A_RAT]	59.4281	2.07	1	2	2	3	1.20318	3	1.25404	1.404	3	10.9894	1.30952	3	0.0426641	0.871252	3	7.94286	0.992752	3	9.32435	1.15382	3	10.8073	0.992978	3	2.36841	773	88.0687	8.54346
	A2	Sequence	# PSMs	# Proteins	# Protein Groups	Protein Group Accessions	Modifications	ΔCn	(115+116)/(113+114)	(115+116)/(113+114) Count	(115+116)/(113+114) Variability [%]	(117+118)/(113+114)	(117+118)/(113+114) Count	(117+118)/(113+114) Variability [%]	(119+121)/(113+114)	(119+121)/(113+114) Count	(119+121)/(113+114) Variability [%]	114/113	114/113 Count	114/113 Variability [%]	115/116	115/116 Count	115/116 Variability [%]	117/118	117/118 Count	117/118 Variability [%]	119/121	119/121 Count	119/121 Variability [%]	IonScore	Exp Value	Charge	MH+ [Da]	ΔM [ppm]	RT [min]	# Missed Cleavages
	High	qSLDAVEk	2	1	1	P32198	N-Term(iTRAQ8plex); K8(iTRAQ8plex)	0	1.23642	2	4.0419	1.47881	2	7.70815	1.30971	2	0.0213321	0.894868	2	3.96674	1.04671	2	7.85905	1.10143	2	6.89712	0.98508	2	1.18408	36.95	0.00130185	2	1497.86	-9.67318	12.6984	0
	High	eVLSEPWR	1	1	1	P32198	N-Term(iTRAQ8plex)	0	1.19305	1		1.30399	1		1.24615	1		0.759695	1		0.932366	1		1.2408	1		1.01953	1		29.07	0.00396415	2	1319.73	-0.0996819	14.6835	0
Q62761	Casein kinase I isoform gamma-1 OS=Rattus norvegicus GN=Csnk1g1 PE=2 SV=1 - [KC1G1_RAT]	37.03	2.31	1	1	1	1	1.37223	1		1.30872	1		1.5258	1		0.95663	1		1.11505	1		0.91197	1		1.02446	1		390	45.0979	9.1001
	A2	Sequence	# PSMs	# Proteins	# Protein Groups	Protein Group Accessions	Modifications	ΔCn	(115+116)/(113+114)	(115+116)/(113+114) Count	(115+116)/(113+114) Variability [%]	(117+118)/(113+114)	(117+118)/(113+114) Count	(117+118)/(113+114) Variability [%]	(119+121)/(113+114)	(119+121)/(113+114) Count	(119+121)/(113+114) Variability [%]	114/113	114/113 Count	114/113 Variability [%]	115/116	115/116 Count	115/116 Variability [%]	117/118	117/118 Count	117/118 Variability [%]	119/121	119/121 Count	119/121 Variability [%]	IonScore	Exp Value	Charge	MH+ [Da]	ΔM [ppm]	RT [min]	# Missed Cleavages
	High	nLFTDLFER	1	1	1	Q62761	N-Term(iTRAQ8plex)	0	1.37223	1		1.30872	1		1.5258	1		0.95663	1		1.11505	1		0.91197	1		1.02446	1		37.03	0.000941225	2	1458.78	-4.59209	13.7295	0
P04762	Catalase OS=Rattus norvegicus GN=Cat PE=1 SV=3 - [CATA_RAT]	154.532	8.16	1	3	3	4	0.968982	4	24.2721	1.36688	4	2.96341	1.36948	4	11.8495	0.942778	4	9.62878	0.930278	3	29.756	1.26902	4	14.104	0.943145	4	5.40107	527	59.7195	7.50342
	A2	Sequence	# PSMs	# Proteins	# Protein Groups	Protein Group Accessions	Modifications	ΔCn	(115+116)/(113+114)	(115+116)/(113+114) Count	(115+116)/(113+114) Variability [%]	(117+118)/(113+114)	(117+118)/(113+114) Count	(117+118)/(113+114) Variability [%]	(119+121)/(113+114)	(119+121)/(113+114) Count	(119+121)/(113+114) Variability [%]	114/113	114/113 Count	114/113 Variability [%]	115/116	115/116 Count	115/116 Variability [%]	117/118	117/118 Count	117/118 Variability [%]	119/121	119/121 Count	119/121 Variability [%]	IonScore	Exp Value	Charge	MH+ [Da]	ΔM [ppm]	RT [min]	# Missed Cleavages
	High	gPLLVQDVVFTDEMAHFDR	2	1	1	P04762	N-Term(iTRAQ8plex)	0	0.725653	2	29.898	1.36688	2	1.24766	1.18815	2	10.2455	0.767116	2	27.6571	0.764348	1		1.39502	2	0.0986951	0.909429	2	1.33056	75.67	1.81583e-07	3	2493.26	-5.15836	13.4422	0
	High	fNSANEDNVTQVR	1	1	1	P04762	N-Term(iTRAQ8plex)	0	1.2207	1		1.42833	1		1.47336	1		1.04874	1		1.15742	1		0.966571	1		1.07216	1		36.21	0.000586362	2	1797.89	-9.28146	10.9864	0
	High	lAQEDPDYGLR	1	1	1	P04762	N-Term(iTRAQ8plex)	0	1.06216	1		1.32442	1		1.49274	1		0.964785	1		0.930278	1		1.15517	1		0.969373	1		32.96	0.00217505	2	1580.83	7.93448	17.885	0
P00787	Cathepsin B OS=Rattus norvegicus GN=Ctsb PE=1 SV=2 - [CATB_RAT]	217.047	17.4	1	4	4	7	1.68037	2	34.291	2.82804	3	30.7106	3.35408	3	14.5027	1.00747	2	28.4525	0.962683	2	2.04784	1.05266	3	25.8533	0.993645	3	5.86381	339	37.4456	5.60498
	A2	Sequence	# PSMs	# Proteins	# Protein Groups	Protein Group Accessions	Modifications	ΔCn	(115+116)/(113+114)	(115+116)/(113+114) Count	(115+116)/(113+114) Variability [%]	(117+118)/(113+114)	(117+118)/(113+114) Count	(117+118)/(113+114) Variability [%]	(119+121)/(113+114)	(119+121)/(113+114) Count	(119+121)/(113+114) Variability [%]	114/113	114/113 Count	114/113 Variability [%]	115/116	115/116 Count	115/116 Variability [%]	117/118	117/118 Count	117/118 Variability [%]	119/121	119/121 Count	119/121 Variability [%]	IonScore	Exp Value	Charge	MH+ [Da]	ΔM [ppm]	RT [min]	# Missed Cleavages
	High	vGFSEDINLPESFDAR	3	1	1	P00787	N-Term(iTRAQ8plex)	0	2.10414	1		3.46279	1		3.69688	1		0.834652	1		0.949479	1		1.05266	1		0.993645	1		69.84	3.47572e-07	2	2100.05	-3.23033	13.4614	0
	High	nGPVEGAFTVFSDFLTYk	1	1	1	P00787	N-Term(iTRAQ8plex); K18(iTRAQ8plex)	0				2.82804	1		3.35408	1								1.504	1		0.664229	1		64.22	3.5952e-06	3	2600.37	-5.09566	10.4134	0
	High	gENHcGIESEIVAGIPR	2	1	1	P00787	N-Term(iTRAQ8plex); C5(Carbamidomethyl)	0																						61.96	3.1203e-06	3	2142.09	-2.75844	5.84628	0
	High	icIHTnGR	1	1	1	P00787	N-Term(iTRAQ8plex); C2(Carbamidomethyl); N6(Deamidated)	0	1.34195	1		1.88311	1		2.68156	1		1.21608	1		0.976071	1		0.886703	1		1.0337	1		27.16	0.00346157	2	1275.67	-7.82561	11.1906	0
P24268	Cathepsin D OS=Rattus norvegicus GN=Ctsd PE=1 SV=1 - [CATD_RAT]	128.224	12.29	1	3	3	4	1.07149	3	6.02166	2.17648	2	3.05694	2.53651	3	6.08039	0.958172	3	11.2588	1.292	2	9.18459	1.04428	2	2.45434	1.01412	3	9.0145	407	44.6519	7.09326
	A2	Sequence	# PSMs	# Proteins	# Protein Groups	Protein Group Accessions	Modifications	ΔCn	(115+116)/(113+114)	(115+116)/(113+114) Count	(115+116)/(113+114) Variability [%]	(117+118)/(113+114)	(117+118)/(113+114) Count	(117+118)/(113+114) Variability [%]	(119+121)/(113+114)	(119+121)/(113+114) Count	(119+121)/(113+114) Variability [%]	114/113	114/113 Count	114/113 Variability [%]	115/116	115/116 Count	115/116 Variability [%]	117/118	117/118 Count	117/118 Variability [%]	119/121	119/121 Count	119/121 Variability [%]	IonScore	Exp Value	Charge	MH+ [Da]	ΔM [ppm]	RT [min]	# Missed Cleavages
	High	vSSLPIITFk	2	1	1	P24268	N-Term(iTRAQ8plex); K10(iTRAQ8plex)	0	1.09345	2	3.00879	2.17648	2	3.05694	2.58901	2	3.03809	0.995134	2	5.61609	1.292	2	9.18459	1.04428	2	2.45434	0.983814	2	4.50041	46.85	3.40788e-05	2	1713.08	2.4839	5.13679	0
	High	aIGAVPLIQGEYMIPcEk	1	1	1	P24268	N-Term(iTRAQ8plex); C16(Carbamidomethyl); K18(iTRAQ8plex)	0	0.515079	1					0.872733	1		0.568617	1								1.28482	1		46.54	0.00025842	3	2597.42	-2.66801	12.5497	0
	High	gGcEAIVDTGTSLLVGPVDEVk	1	1	1	P24268	N-Term(iTRAQ8plex); C3(Carbamidomethyl); K22(iTRAQ8plex)	0																						46.15	0.000285127	4	2824.52	0.52721	22.3399	0
P70500	CDP-diacylglycerol--inositol 3-phosphatidyltransferase OS=Rattus norvegicus GN=Cdipt PE=1 SV=1 - [CDIPT_RAT]	30.49	4.69	1	1	1	1	1.74243	1		1.61743	1		1.68245	1		1.09423	1		1.4559	1		1.17067	1		1.12676	1		213	23.5972	8.26514
	A2	Sequence	# PSMs	# Proteins	# Protein Groups	Protein Group Accessions	Modifications	ΔCn	(115+116)/(113+114)	(115+116)/(113+114) Count	(115+116)/(113+114) Variability [%]	(117+118)/(113+114)	(117+118)/(113+114) Count	(117+118)/(113+114) Variability [%]	(119+121)/(113+114)	(119+121)/(113+114) Count	(119+121)/(113+114) Variability [%]	114/113	114/113 Count	114/113 Variability [%]	115/116	115/116 Count	115/116 Variability [%]	117/118	117/118 Count	117/118 Variability [%]	119/121	119/121 Count	119/121 Variability [%]	IonScore	Exp Value	Charge	MH+ [Da]	ΔM [ppm]	RT [min]	# Missed Cleavages
	High	nMAALDAADR	1	1	1	P70500	N-Term(iTRAQ8plex)	0	1.74243	1		1.61743	1		1.68245	1		1.09423	1		1.4559	1		1.17067	1		1.12676	1		30.49	0.00151862	2	1351.68	-6.81903	12.388	0
P39951	Cell division control protein 2 homolog OS=Rattus norvegicus GN=Cdc2 PE=2 SV=1 - [CDC2_RAT]	55.37	4.71	1	1	1	1	0.726579	1		0.271033	1		0.325433	1		0.957309	1		1.05483	1		0.99537	1		0.687698	1		297	34.113	8.41162
	A2	Sequence	# PSMs	# Proteins	# Protein Groups	Protein Group Accessions	Modifications	ΔCn	(115+116)/(113+114)	(115+116)/(113+114) Count	(115+116)/(113+114) Variability [%]	(117+118)/(113+114)	(117+118)/(113+114) Count	(117+118)/(113+114) Variability [%]	(119+121)/(113+114)	(119+121)/(113+114) Count	(119+121)/(113+114) Variability [%]	114/113	114/113 Count	114/113 Variability [%]	115/116	115/116 Count	115/116 Variability [%]	117/118	117/118 Count	117/118 Variability [%]	119/121	119/121 Count	119/121 Variability [%]	IonScore	Exp Value	Charge	MH+ [Da]	ΔM [ppm]	RT [min]	# Missed Cleavages
	High	lESEEEGVPSTAIR	1	1	1	P39951	N-Term(iTRAQ8plex)	0	0.726579	1		0.271033	1		0.325433	1		0.957309	1		1.05483	1		0.99537	1		0.687698	1		55.37	1.78597e-05	2	1820.97	9.65975	16.6032	0
Q8CFN2	Cell division control protein 42 homolog OS=Rattus norvegicus GN=Cdc42 PE=1 SV=2 - [CDC42_RAT]	74.8042	8.9	1	1	1	2	2.42064	1		1.58429	1		2.5597	1					0.942902	1					0.63597	1		191	21.245	6.55127
	A2	Sequence	# PSMs	# Proteins	# Protein Groups	Protein Group Accessions	Modifications	ΔCn	(115+116)/(113+114)	(115+116)/(113+114) Count	(115+116)/(113+114) Variability [%]	(117+118)/(113+114)	(117+118)/(113+114) Count	(117+118)/(113+114) Variability [%]	(119+121)/(113+114)	(119+121)/(113+114) Count	(119+121)/(113+114) Variability [%]	114/113	114/113 Count	114/113 Variability [%]	115/116	115/116 Count	115/116 Variability [%]	117/118	117/118 Count	117/118 Variability [%]	119/121	119/121 Count	119/121 Variability [%]	IonScore	Exp Value	Charge	MH+ [Da]	ΔM [ppm]	RT [min]	# Missed Cleavages
	High	nVFDEAILAALEPPEPk	2	1	1	Q8CFN2	N-Term(iTRAQ8plex); K17(iTRAQ8plex)	0	2.42064	1		1.58429	1		2.5597	1					0.942902	1					0.63597	1		50.09	9.06028e-05	3	2461.36	-7.6186	13.4571	0
O08837	Cell division cycle 5-related protein OS=Rattus norvegicus GN=Cdc5l PE=1 SV=2 - [CDC5L_RAT]	58.3274	1.12	1	1	1	2	0.950194	2	7.43084	0.54588	2	11.6321	1.029	2	18.3018	0.895773	2	8.04364	0.847988	2	3.69215	0.688784	2	1.34176	0.782784	2	16.7403	802	92.1606	8.01611
	A2	Sequence	# PSMs	# Proteins	# Protein Groups	Protein Group Accessions	Modifications	ΔCn	(115+116)/(113+114)	(115+116)/(113+114) Count	(115+116)/(113+114) Variability [%]	(117+118)/(113+114)	(117+118)/(113+114) Count	(117+118)/(113+114) Variability [%]	(119+121)/(113+114)	(119+121)/(113+114) Count	(119+121)/(113+114) Variability [%]	114/113	114/113 Count	114/113 Variability [%]	115/116	115/116 Count	115/116 Variability [%]	117/118	117/118 Count	117/118 Variability [%]	119/121	119/121 Count	119/121 Variability [%]	IonScore	Exp Value	Charge	MH+ [Da]	ΔM [ppm]	RT [min]	# Missed Cleavages
	High	qQDLDGELR	2	1	1	O08837	N-Term(iTRAQ8plex)	0	0.950194	2	7.43084	0.54588	2	11.6321	1.029	2	18.3018	0.895773	2	8.04364	0.847988	2	3.69215	0.688784	2	1.34176	0.782784	2	16.7403	41.14	0.000161517	2	1377.72	-8.06627	14.8067	0
P97586	Cell growth regulator with EF hand domain protein 1 OS=Rattus norvegicus GN=Cgref1 PE=1 SV=1 - [CGRE1_RAT]	56.6418	3.91	1	1	1	2	1.80135	2	6.00333	2.43156	2	11.5765	1.74537	2	4.47919	0.92122	2	2.21742	1.10003	2	1.72045	1.11663	2	5.97731	1.09595	2	6.74271	281	30.8154	4.37354
	A2	Sequence	# PSMs	# Proteins	# Protein Groups	Protein Group Accessions	Modifications	ΔCn	(115+116)/(113+114)	(115+116)/(113+114) Count	(115+116)/(113+114) Variability [%]	(117+118)/(113+114)	(117+118)/(113+114) Count	(117+118)/(113+114) Variability [%]	(119+121)/(113+114)	(119+121)/(113+114) Count	(119+121)/(113+114) Variability [%]	114/113	114/113 Count	114/113 Variability [%]	115/116	115/116 Count	115/116 Variability [%]	117/118	117/118 Count	117/118 Variability [%]	119/121	119/121 Count	119/121 Variability [%]	IonScore	Exp Value	Charge	MH+ [Da]	ΔM [ppm]	RT [min]	# Missed Cleavages
	High	vDALSPEGEAR	2	1	1	P97586	N-Term(iTRAQ8plex)	0	1.80135	2	6.00333	2.43156	2	11.5765	1.74537	2	4.47919	0.92122	2	2.21742	1.10003	2	1.72045	1.11663	2	5.97731	1.09595	2	6.74271	41.54	0.000234988	2	1447.76	-8.02013	13.5507	0
Q9EPF2	Cell surface glycoprotein MUC18 OS=Rattus norvegicus GN=Mcam PE=1 SV=2 - [MUC18_RAT]	196.131	5.71	1	3	3	5	2.10993	5	48.5847	4.58693	5	14.3662	3.05042	5	44.7151	1.00255	5	8.62574	1.00295	5	39.3793	1.06367	5	8.97794	1.03168	4	3.44217	648	71.2822	6.0874
	A2	Sequence	# PSMs	# Proteins	# Protein Groups	Protein Group Accessions	Modifications	ΔCn	(115+116)/(113+114)	(115+116)/(113+114) Count	(115+116)/(113+114) Variability [%]	(117+118)/(113+114)	(117+118)/(113+114) Count	(117+118)/(113+114) Variability [%]	(119+121)/(113+114)	(119+121)/(113+114) Count	(119+121)/(113+114) Variability [%]	114/113	114/113 Count	114/113 Variability [%]	115/116	115/116 Count	115/116 Variability [%]	117/118	117/118 Count	117/118 Variability [%]	119/121	119/121 Count	119/121 Variability [%]	IonScore	Exp Value	Charge	MH+ [Da]	ΔM [ppm]	RT [min]	# Missed Cleavages
	High	aESNQDLEFEWLR	2	1	1	Q9EPF2	N-Term(iTRAQ8plex)	0	2.91789	2	2.03199	5.28408	2	6.69172	4.00189	2	7.6082	0.805903	2	35.0079	0.981748	2	3.16833	1.09631	2	4.48221	1.0528	2	3.44217	73.76	1.55669e-07	2	1940.97	2.14473	24.7037	0
	High	vWVEVEPVGLLk	2	1	1	Q9EPF2	N-Term(iTRAQ8plex); K12(iTRAQ8plex)	0	2.06996	2	2.83603	4.47579	2	3.63761	2.64137	2	21.5923	0.997767	2	9.33872	0.998794	2	40.0659	1.01837	2	3.17372	0.974106	2	8.96771	53.1	1.78769e-05	2	1976.22	5.51667	7.24334	0
	High	eVTVPVLYPAEk	1	1	1	Q9EPF2	N-Term(iTRAQ8plex); K12(iTRAQ8plex)	0	1.12343	1		1.17905	1		0.728935	1		1.00255	1		1.51968	1		1.13957	1					29.1	0.00787372	3	1953.15	-1.94505	11.0557	0
Q4QQV8	Charged multivesicular body protein 5 OS=Rattus norvegicus GN=Chmp5 PE=2 SV=1 - [CHMP5_RAT]	48.28	7.31	1	1	1	1	1.16812	1		1.50672	1		1.04437	1		1.04995	1		1.10317	1		1.25383	1		1.06014	1		219	24.5603	4.79248
	A2	Sequence	# PSMs	# Proteins	# Protein Groups	Protein Group Accessions	Modifications	ΔCn	(115+116)/(113+114)	(115+116)/(113+114) Count	(115+116)/(113+114) Variability [%]	(117+118)/(113+114)	(117+118)/(113+114) Count	(117+118)/(113+114) Variability [%]	(119+121)/(113+114)	(119+121)/(113+114) Count	(119+121)/(113+114) Variability [%]	114/113	114/113 Count	114/113 Variability [%]	115/116	115/116 Count	115/116 Variability [%]	117/118	117/118 Count	117/118 Variability [%]	119/121	119/121 Count	119/121 Variability [%]	IonScore	Exp Value	Charge	MH+ [Da]	ΔM [ppm]	RT [min]	# Missed Cleavages
	High	aPPPSLTDcIGTVDSR	1	1	1	Q4QQV8	N-Term(iTRAQ8plex); C9(Carbamidomethyl)	0	1.16812	1		1.50672	1		1.04437	1		1.04995	1		1.10317	1		1.25383	1		1.06014	1		48.28	6.01804e-05	2	1990.02	-0.112223	19.075	0
Q9WU61	Chloride channel CLIC-like protein 1 OS=Rattus norvegicus GN=Clcc1 PE=1 SV=1 - [CLCC1_RAT]	31.31	1.29	1	1	1	1	0.977685	1		0.78469	1		0.815343	1		0.91954	1		1.03936	1		1.04774	1		0.944082	1		541	61.1347	5.61768
	A2	Sequence	# PSMs	# Proteins	# Protein Groups	Protein Group Accessions	Modifications	ΔCn	(115+116)/(113+114)	(115+116)/(113+114) Count	(115+116)/(113+114) Variability [%]	(117+118)/(113+114)	(117+118)/(113+114) Count	(117+118)/(113+114) Variability [%]	(119+121)/(113+114)	(119+121)/(113+114) Count	(119+121)/(113+114) Variability [%]	114/113	114/113 Count	114/113 Variability [%]	115/116	115/116 Count	115/116 Variability [%]	117/118	117/118 Count	117/118 Variability [%]	119/121	119/121 Count	119/121 Variability [%]	IonScore	Exp Value	Charge	MH+ [Da]	ΔM [ppm]	RT [min]	# Missed Cleavages
	High	aLEPDDR	1	1	1	Q9WU61	N-Term(iTRAQ8plex)	0	0.977685	1		0.78469	1		0.815343	1		0.91954	1		1.03936	1		1.04774	1		0.944082	1		31.31	0.000813566	2	1119.59	-2.95022	15.4061	0
Q6MG61	Chloride intracellular channel protein 1 OS=Rattus norvegicus GN=Clic1 PE=1 SV=1 - [CLIC1_RAT]	84.96	7.47	1	1	1	1	1.29072	1		1.85164	1		1.70043	1		1.06666	1		0.625907	1		1.04948	1		0.876527	1		241	26.9638	5.17334
	A2	Sequence	# PSMs	# Proteins	# Protein Groups	Protein Group Accessions	Modifications	ΔCn	(115+116)/(113+114)	(115+116)/(113+114) Count	(115+116)/(113+114) Variability [%]	(117+118)/(113+114)	(117+118)/(113+114) Count	(117+118)/(113+114) Variability [%]	(119+121)/(113+114)	(119+121)/(113+114) Count	(119+121)/(113+114) Variability [%]	114/113	114/113 Count	114/113 Variability [%]	115/116	115/116 Count	115/116 Variability [%]	117/118	117/118 Count	117/118 Variability [%]	119/121	119/121 Count	119/121 Variability [%]	IonScore	Exp Value	Charge	MH+ [Da]	ΔM [ppm]	RT [min]	# Missed Cleavages
	High	lAALNPESNTSGLDIFAk	1	1	1	Q6MG61	N-Term(iTRAQ8plex); K18(iTRAQ8plex)	0	1.29072	1		1.85164	1		1.70043	1		1.06666	1		0.625907	1		1.04948	1		0.876527	1		84.96	2.68089e-08	3	2469.4	7.13227	13.3423	0
P19836	Choline-phosphate cytidylyltransferase A OS=Rattus norvegicus GN=Pcyt1a PE=1 SV=2 - [PCY1A_RAT]	31.73	3.27	2	1	1	1	1.16743	1		1.14126	1		1.51447	1		1.02641	1		1.02131	1		0.983879	1		1.00648	1		367	41.6548	7.03467
	A2	Sequence	# PSMs	# Proteins	# Protein Groups	Protein Group Accessions	Modifications	ΔCn	(115+116)/(113+114)	(115+116)/(113+114) Count	(115+116)/(113+114) Variability [%]	(117+118)/(113+114)	(117+118)/(113+114) Count	(117+118)/(113+114) Variability [%]	(119+121)/(113+114)	(119+121)/(113+114) Count	(119+121)/(113+114) Variability [%]	114/113	114/113 Count	114/113 Variability [%]	115/116	115/116 Count	115/116 Variability [%]	117/118	117/118 Count	117/118 Variability [%]	119/121	119/121 Count	119/121 Variability [%]	IonScore	Exp Value	Charge	MH+ [Da]	ΔM [ppm]	RT [min]	# Missed Cleavages
	High	tEGISTSDIITR	1	2	1	P19836	N-Term(iTRAQ8plex)	0	1.16743	1		1.14126	1		1.51447	1		1.02641	1		1.02131	1		0.983879	1		1.00648	1		31.73	0.00282	2	1596.89	7.51023	14.6168	0
Q01818	Chromaffin granule amine transporter OS=Rattus norvegicus GN=Slc18a1 PE=2 SV=1 - [VMAT1_RAT]	35.65	1.54	1	1	1	1	0.969852	1		0.805047	1		0.528685	1		0.808714	1		1.09459	1		0.957774	1		0.827331	1		521	55.8981	5.88428
	A2	Sequence	# PSMs	# Proteins	# Protein Groups	Protein Group Accessions	Modifications	ΔCn	(115+116)/(113+114)	(115+116)/(113+114) Count	(115+116)/(113+114) Variability [%]	(117+118)/(113+114)	(117+118)/(113+114) Count	(117+118)/(113+114) Variability [%]	(119+121)/(113+114)	(119+121)/(113+114) Count	(119+121)/(113+114) Variability [%]	114/113	114/113 Count	114/113 Variability [%]	115/116	115/116 Count	115/116 Variability [%]	117/118	117/118 Count	117/118 Variability [%]	119/121	119/121 Count	119/121 Variability [%]	IonScore	Exp Value	Charge	MH+ [Da]	ΔM [ppm]	RT [min]	# Missed Cleavages
	High	iGILFASk	1	1	1	Q01818	N-Term(iTRAQ8plex); K8(iTRAQ8plex)	0	0.969852	1		0.805047	1		0.528685	1		0.808714	1		1.09459	1		0.957774	1		0.827331	1		35.65	0.000353951	2	1456.95	7.5123	7.28937	0
Q8VHF5	Citrate synthase, mitochondrial OS=Rattus norvegicus GN=Cs PE=1 SV=1 - [CISY_RAT]	210.747	8.15	1	3	3	7	0.958638	6	12.8004	1.07751	6	4.22505	0.992887	6	2.55693	0.93825	6	10.3162	1.08822	6	7.67437	0.998961	6	8.68653	1.05675	6	7.68919	466	51.8335	8.35303
	A2	Sequence	# PSMs	# Proteins	# Protein Groups	Protein Group Accessions	Modifications	ΔCn	(115+116)/(113+114)	(115+116)/(113+114) Count	(115+116)/(113+114) Variability [%]	(117+118)/(113+114)	(117+118)/(113+114) Count	(117+118)/(113+114) Variability [%]	(119+121)/(113+114)	(119+121)/(113+114) Count	(119+121)/(113+114) Variability [%]	114/113	114/113 Count	114/113 Variability [%]	115/116	115/116 Count	115/116 Variability [%]	117/118	117/118 Count	117/118 Variability [%]	119/121	119/121 Count	119/121 Variability [%]	IonScore	Exp Value	Charge	MH+ [Da]	ΔM [ppm]	RT [min]	# Missed Cleavages
	High	gLVYETSVLDPDEGIR	2	1	1	Q8VHF5	N-Term(iTRAQ8plex)	0	0.872503	2	8.13854	1.11832	2	8.6468	0.968449	2	5.77614	0.886846	2	2.36532	1.14164	2	8.48618	0.96918	2	13.8324	1.05675	2	4.31052	60.59	4.4958e-06	2	2067.09	-2.05586	16.532	0
	High	eGSSIGAIDSk	3	1	1	Q8VHF5	N-Term(iTRAQ8plex); K11(iTRAQ8plex)	0	1.0946	3	1.18445	1.09908	3	2.38856	0.988356	3	1.35612	0.976925	3	4.69676	1.0983	3	5.79427	1.01523	3	4.79163	1.00937	3	5.74711	56.04	1.26932e-05	2	1671.92	-8.58297	11.8901	0
	High	dYIWNTLnSGR	2	1	1	Q8VHF5	N-Term(iTRAQ8plex); N8(Deamidated)	0	0.979376	1		0.913095	1		1.0285	1		1.00301	1		0.958139	1		0.807245	1		1.12167	1		42.41	0.000106212	2	1643.83	-0.328604	13.2279	0
P11442	Clathrin heavy chain 1 OS=Rattus norvegicus GN=Cltc PE=1 SV=3 - [CLH_RAT]	1076.01	9.67	1	12	12	43	1.13575	29	13.3581	1.35404	29	13.7332	1.26777	30	8.36007	1.00269	27	17.7141	1.00407	28	22.7144	1.06732	30	11.2358	0.89647	29	14.6755	1675	191.477	5.71924
	A2	Sequence	# PSMs	# Proteins	# Protein Groups	Protein Group Accessions	Modifications	ΔCn	(115+116)/(113+114)	(115+116)/(113+114) Count	(115+116)/(113+114) Variability [%]	(117+118)/(113+114)	(117+118)/(113+114) Count	(117+118)/(113+114) Variability [%]	(119+121)/(113+114)	(119+121)/(113+114) Count	(119+121)/(113+114) Variability [%]	114/113	114/113 Count	114/113 Variability [%]	115/116	115/116 Count	115/116 Variability [%]	117/118	117/118 Count	117/118 Variability [%]	119/121	119/121 Count	119/121 Variability [%]	IonScore	Exp Value	Charge	MH+ [Da]	ΔM [ppm]	RT [min]	# Missed Cleavages
	High	tSIDAYDNFDNISLAQR	4	1	1	P11442	N-Term(iTRAQ8plex)	0	1.40548	2	8.6217	1.45828	2	7.35603	1.34619	3	4.64856	0.864294	2	10.1519	0.928395	2	10.5947	1.0269	2	5.11939	0.913522	2	11.0192	108.27	5.3617e-11	2	2247.12	-1.56952	12.5853	0
	High	lPVVIGGLLDVDcSEDVIk	4	1	1	P11442	N-Term(iTRAQ8plex); C13(Carbamidomethyl); K19(iTRAQ8plex)	0	1.38558	2	30.1301	1.88366	2	32.3876	2.00976	2	9.22095	1.18749	2	30.3776	0.865221	2	36.9444	1.01231	3	22.887	0.898063	2	12.9407	78.01	1.81844e-07	3	2649.49	-5.29144	14.186	0
	High	lAELEEFINGPNNAHIQQVGDR	2	1	1	P11442	N-Term(iTRAQ8plex)	0	1.00676	2	31.5255	1.02456	2	46.8117	1.01661	2	1.0614	0.937721	2	24.4029	0.932664	2	2.22183	1.06341	2	12.3837	0.810687	2	29.5263	76.89	1.47344e-07	3	2768.41	-6.60153	10.0361	0
	High	lAELEEFInGPNNAHIQQVGDR	10	1	1	P11442	N-Term(iTRAQ8plex); N9(Deamidated)	0	0.949109	2	4.6115	1.1034	2	39.7594	1.04984	2	28.7814	0.985035	2	42.9441	1.22706	2	38.1594	1.38339	2	37.7828	0.821685	2	48.7495	75.38	1.97019e-07	3	2769.39	-6.13897	11.9676	0
	High	nLQNLLILTAIk	1	1	1	P11442	N-Term(iTRAQ8plex); K12(iTRAQ8plex)	0	1.17658	1		1.30904	1		1.29526	1		0.890587	1		1.17001	1		1.00282	1		1.17913	1		70.75	2.01935e-07	2	1962.24	-9.61272	9.74436	0
	High	nNLAGAEELFAR	4	1	1	P11442	N-Term(iTRAQ8plex); N1(Deamidated)	0	1.07195	2	4.73079	1.13742	2	4.08223	1.21427	2	5.03361	0.981929	2	23.0274	0.956332	2	13.7606	1.03051	2	9.40072	0.95235	2	5.63697	51.68	2.75077e-05	2	1609.85	-0.445533	8.55311	0
	High	nNLAGAEELFAR	2	1	1	P11442	N-Term(iTRAQ8plex)	0	1.20436	2	5.73815	1.43189	2	5.38449	1.38167	2	8.94087	0.946727	2	0.00511988	1.23595	2	0.980318	1.00039	2	5.32538	1.0992	2	11.2867	51.15	3.87518e-05	2	1608.86	-1.9588	8.13257	0
	High	gQcDLELINVcNENSLFk	2	1	1	P11442	N-Term(iTRAQ8plex); C3(Carbamidomethyl); C11(Carbamidomethyl); K18(iTRAQ8plex)	0	1.48136	2	106.993	2.30729	2	15.2899	2.3837	2	7.57304				1.3103	1		0.823596	2	28.9792	0.789827	2	19.2897	44.75	0.000296444	3	2761.42	3.78123	19.3682	0
	High	eSNcYDPER	3	1	1	P11442	N-Term(iTRAQ8plex); C4(Carbamidomethyl)	0	1.11993	3	1.81539	1.18168	3	2.78057	1.25853	3	0.83847	1.14485	3	12.6579	0.856401	3	4.92756	1.02711	3	3.56412	0.854672	3	0.23918	43.73	4.22639e-05	2	1473.66	-1.27418	15.6109	0
	High	aFMTADLPNELIELLEk	1	1	1	P11442	N-Term(iTRAQ8plex); K17(iTRAQ8plex)	0	1.19573	1		1.67037	1		1.03306	1		2.14061	1		1.2879	1		1.15388	1		0.655581	1		40.88	0.000800251	3	2555.44	4.02579	8.15007	0
	High	iYIDSNNNPER	4	1	1	P11442	N-Term(iTRAQ8plex)	0	1.18342	4	6.61454	1.30342	4	5.78936	1.24756	4	1.57812	1.02335	4	5.86729	1.01281	4	8.23821	1.10764	4	4.84229	0.920348	4	7.67151	36.55	0.000730321	2	1638.83	-7.97402	10.754	0
	High	eAIDSYIk	2	1	1	P11442	N-Term(iTRAQ8plex); K8(iTRAQ8plex)	0	1.04719	2	6.39445	1.43098	2	1.98021	1.18099	2	2.72123	0.883093	2	11.8733	1.26987	2	5.36093	1.16861	2	4.99448	0.937777	2	11.1162	32.38	0.00349748	2	1546.89	-2.58277	15.9652	0
	High	lLLPWLEAR	1	1	1	P11442	N-Term(iTRAQ8plex)	0	1.01867	1		1.35404	1		1.28765	1		0.752756	1		1.22588	1		1.24178	1		0.916005	1		30.82	0.00401552	2	1414.86	-7.71348	9.30016	0
	High	eNPYYDSR	3	1	1	P11442	N-Term(iTRAQ8plex)	0	1.19682	3	5.4522	1.27444	3	3.02168	1.27237	3	7.58672	1.05254	3	7.20371	0.860185	3	3.52868	1.20053	3	9.52608	0.780877	3	0.8203	24.46	0.00357248	2	1347.64	-2.71767	11.7331	0
P08081	Clathrin light chain A OS=Rattus norvegicus GN=Clta PE=1 SV=1 - [CLCA_RAT]	55.4481	3.63	1	1	1	2	1.14692	2	0.904363	1.24549	2	3.5437	1.08848	2	3.10213	1.01005	2	23.8691	0.991435	2	4.98538	0.943057	2	0.119999	0.923784	2	5.78052	248	26.964	4.50049
	A2	Sequence	# PSMs	# Proteins	# Protein Groups	Protein Group Accessions	Modifications	ΔCn	(115+116)/(113+114)	(115+116)/(113+114) Count	(115+116)/(113+114) Variability [%]	(117+118)/(113+114)	(117+118)/(113+114) Count	(117+118)/(113+114) Variability [%]	(119+121)/(113+114)	(119+121)/(113+114) Count	(119+121)/(113+114) Variability [%]	114/113	114/113 Count	114/113 Variability [%]	115/116	115/116 Count	115/116 Variability [%]	117/118	117/118 Count	117/118 Variability [%]	119/121	119/121 Count	119/121 Variability [%]	IonScore	Exp Value	Charge	MH+ [Da]	ΔM [ppm]	RT [min]	# Missed Cleavages
	High	lEALDAnSR	1	1	1	P08081	N-Term(iTRAQ8plex); N7(Deamidated)	0	1.13994	1		1.21608	1		1.06595	1		0.86177	1		1.02532	1		0.942294	1		0.888488	1		47.34	9.04058e-05	2	1293.69	-1.124	18.2037	0
	High	lEALDANSR	1	1	1	P08081	N-Term(iTRAQ8plex)	0	1.15394	1		1.27561	1		1.11149	1		1.18385	1		0.958672	1		0.943821	1		0.960481	1		27.61	0.010923	2	1292.71	-1.02485	13.5322	0
P08082	Clathrin light chain B OS=Rattus norvegicus GN=Cltb PE=1 SV=1 - [CLCB_RAT]	106.407	7.42	1	2	2	5	1.11904	5	3.72804	1.67701	5	1.14661	1.3979	5	6.28901	0.99627	5	3.39808	1.04728	5	11.321	1.04697	5	4.24999	0.903875	5	5.18966	229	25.1021	4.62744
	A2	Sequence	# PSMs	# Proteins	# Protein Groups	Protein Group Accessions	Modifications	ΔCn	(115+116)/(113+114)	(115+116)/(113+114) Count	(115+116)/(113+114) Variability [%]	(117+118)/(113+114)	(117+118)/(113+114) Count	(117+118)/(113+114) Variability [%]	(119+121)/(113+114)	(119+121)/(113+114) Count	(119+121)/(113+114) Variability [%]	114/113	114/113 Count	114/113 Variability [%]	115/116	115/116 Count	115/116 Variability [%]	117/118	117/118 Count	117/118 Variability [%]	119/121	119/121 Count	119/121 Variability [%]	IonScore	Exp Value	Charge	MH+ [Da]	ΔM [ppm]	RT [min]	# Missed Cleavages
	High	lQELDAASk	3	1	1	P08082	N-Term(iTRAQ8plex); K9(iTRAQ8plex)	0	1.11904	3	3.72804	1.67701	3	1.14661	1.3399	3	6.46893	0.99627	3	4.34177	1.27059	3	1.67347	1.0774	3	3.99127	0.903875	3	17.2909	55.42	2.41146e-05	3	1582.92	-1.39553	15.8012	0
	High	dLEEWNQR	2	1	1	P08082	N-Term(iTRAQ8plex)	0	1.12637	2	4.10132	1.64291	2	3.15758	1.4073	2	0.994238	1.00398	2	2.25497	0.984003	2	2.04519	1.03632	2	1.51547	0.915742	2	3.25329	29.15	0.00340532	2	1393.71	8.0366	16.2456	0
P05371	Clusterin OS=Rattus norvegicus GN=Clu PE=1 SV=2 - [CLUS_RAT]	82.3698	4.47	1	2	2	3	2.1323	3	14.7148	3.68258	3	5.58693	3.89681	3	1.12094	1.119	3	12.439	0.926401	3	5.11003	1.11429	3	2.08096	0.945966	3	3.47932	447	51.3423	5.70654
	A2	Sequence	# PSMs	# Proteins	# Protein Groups	Protein Group Accessions	Modifications	ΔCn	(115+116)/(113+114)	(115+116)/(113+114) Count	(115+116)/(113+114) Variability [%]	(117+118)/(113+114)	(117+118)/(113+114) Count	(117+118)/(113+114) Variability [%]	(119+121)/(113+114)	(119+121)/(113+114) Count	(119+121)/(113+114) Variability [%]	114/113	114/113 Count	114/113 Variability [%]	115/116	115/116 Count	115/116 Variability [%]	117/118	117/118 Count	117/118 Variability [%]	119/121	119/121 Count	119/121 Variability [%]	IonScore	Exp Value	Charge	MH+ [Da]	ΔM [ppm]	RT [min]	# Missed Cleavages
	High	aSGIIDTLFQDR	1	1	1	P05371	N-Term(iTRAQ8plex)	0	1.93186	1		2.45581	1		2.59284	1		1.02928	1		0.926401	1		0.986634	1		0.924032	1		62.18	2.3911e-06	2	1639.89	-5.39237	22.3082	0
	High	eGALDDTR	2	1	1	P05371	N-Term(iTRAQ8plex)	0	2.25008	2	7.9835	3.75257	2	2.79183	3.91157	2	0.560456	1.31541	2	24.3239	1.03782	2	22.2112	1.12213	2	1.0404	0.964261	2	2.84055	26.11	0.00416341	2	1180.61	-1.16253	16.7833	0
B0BNA5	Coactosin-like protein OS=Rattus norvegicus GN=Cotl1 PE=1 SV=1 - [COTL1_RAT]	33.8118	4.93	1	1	1	2	1.1008	2	0.579654	1.29452	2	4.44754	0.806319	2	0.92335	1.01894	2	10.5748	0.94106	2	3.12882	1.17163	2	3.50828	0.935668	2	0.0140337	142	15.922	5.40186
	A2	Sequence	# PSMs	# Proteins	# Protein Groups	Protein Group Accessions	Modifications	ΔCn	(115+116)/(113+114)	(115+116)/(113+114) Count	(115+116)/(113+114) Variability [%]	(117+118)/(113+114)	(117+118)/(113+114) Count	(117+118)/(113+114) Variability [%]	(119+121)/(113+114)	(119+121)/(113+114) Count	(119+121)/(113+114) Variability [%]	114/113	114/113 Count	114/113 Variability [%]	115/116	115/116 Count	115/116 Variability [%]	117/118	117/118 Count	117/118 Variability [%]	119/121	119/121 Count	119/121 Variability [%]	IonScore	Exp Value	Charge	MH+ [Da]	ΔM [ppm]	RT [min]	# Missed Cleavages
	High	eFVISDR	2	1	1	B0BNA5	N-Term(iTRAQ8plex)	0	1.1008	2	0.579654	1.29452	2	4.44754	0.806319	2	0.92335	1.01894	2	10.5748	0.94106	2	3.12882	1.17163	2	3.50828	0.935668	2	0.0140337	26.08	0.00937095	2	1169.66	8.52778	14.8128	0
P23514	Coatomer subunit beta OS=Rattus norvegicus GN=Copb1 PE=1 SV=1 - [COPB_RAT]	138.787	3.36	1	3	3	5	1.19901	5	7.02408	1.09494	5	1.08935	1.06602	5	1.68937	0.993359	5	11.2131	1.09614	5	3.95253	1.06638	5	4.17509	1.10806	5	3.90278	953	106.943	5.96045
	A2	Sequence	# PSMs	# Proteins	# Protein Groups	Protein Group Accessions	Modifications	ΔCn	(115+116)/(113+114)	(115+116)/(113+114) Count	(115+116)/(113+114) Variability [%]	(117+118)/(113+114)	(117+118)/(113+114) Count	(117+118)/(113+114) Variability [%]	(119+121)/(113+114)	(119+121)/(113+114) Count	(119+121)/(113+114) Variability [%]	114/113	114/113 Count	114/113 Variability [%]	115/116	115/116 Count	115/116 Variability [%]	117/118	117/118 Count	117/118 Variability [%]	119/121	119/121 Count	119/121 Variability [%]	IonScore	Exp Value	Charge	MH+ [Da]	ΔM [ppm]	RT [min]	# Missed Cleavages
	High	vLQDLVMDILR	2	1	1	P23514	N-Term(iTRAQ8plex)	0	1.23086	2	7.68794	1.05087	2	6.09672	1.0365	2	2.4751	1.03152	2	5.59339	1.21593	2	7.02694	1.09249	2	3.58818	1.12274	2	1.95084	54.78	1.48034e-05	2	1618.96	3.73524	7.44352	0
	High	eDIQSVMTEVR	1	1	1	P23514	N-Term(iTRAQ8plex)	0	1.14359	1		1.09751	1		1.2859	1		1.0271	1		1.06732	1		1.32207	1		1.07366	1		33.55	0.00167797	2	1610.84	1.55158	15.5303	0
	High	vLSTPDLEVR	2	1	1	P23514	N-Term(iTRAQ8plex)	0	1.2518	2	6.39548	1.04689	2	7.75382	1.07157	2	0.770171	0.892858	2	0.640886	1.08229	2	1.88567	1.04491	2	1.15851	1.05348	2	9.41548	32.86	0.0027692	2	1432.83	0.351338	11.8434	0
O35142	Coatomer subunit beta' OS=Rattus norvegicus GN=Copb2 PE=1 SV=3 - [COPB2_RAT]	234.344	3.65	1	3	3	6	1.26354	6	13.4182	1.34439	6	25.4208	1.35144	6	38.5598	0.982567	6	8.79114	1.03957	6	17.1773	1.05127	6	3.27877	0.926405	6	4.23145	905	102.486	5.2749
	A2	Sequence	# PSMs	# Proteins	# Protein Groups	Protein Group Accessions	Modifications	ΔCn	(115+116)/(113+114)	(115+116)/(113+114) Count	(115+116)/(113+114) Variability [%]	(117+118)/(113+114)	(117+118)/(113+114) Count	(117+118)/(113+114) Variability [%]	(119+121)/(113+114)	(119+121)/(113+114) Count	(119+121)/(113+114) Variability [%]	114/113	114/113 Count	114/113 Variability [%]	115/116	115/116 Count	115/116 Variability [%]	117/118	117/118 Count	117/118 Variability [%]	119/121	119/121 Count	119/121 Variability [%]	IonScore	Exp Value	Charge	MH+ [Da]	ΔM [ppm]	RT [min]	# Missed Cleavages
	High	eAFVVEEWVk	2	1	1	O35142	N-Term(iTRAQ8plex); K10(iTRAQ8plex)	0	1.034	2	5.805	1.1356	2	3.72691	1.05132	2	0.244628	0.851581	2	5.78	1.09681	2	4.72528	1.09557	2	1.9021	0.903224	2	3.68741	71.38	5.05807e-07	2	1844.05	6.40923	8.97671	0
	High	fELALQLGELk	2	1	1	O35142	N-Term(iTRAQ8plex); K11(iTRAQ8plex)	0	1.36334	2	10.5772	1.8058	2	10.6221	1.35144	2	9.34277	0.99446	2	0.327578	1.05046	2	63.7249	1.04162	2	3.1365	1.25011	2	29.7042	57.52	8.67353e-06	3	1869.11	-8.46446	12.8907	0
	High	dNNQFASASLDR	2	1	1	O35142	N-Term(iTRAQ8plex)	0	1.28145	2	2.81111	1.34439	2	0.476049	1.96557	2	2.57466	1.04198	2	10.1865	0.956613	2	9.12426	1.03681	2	0.284366	0.923456	2	0.543412	44.05	7.0839e-05	2	1641.8	-7.01901	14.4123	0
Q4AEF8	Coatomer subunit gamma OS=Rattus norvegicus GN=Copg PE=2 SV=1 - [COPG_RAT]	174.603	3.89	1	3	3	5	1.14607	5	3.00568	1.03348	5	19.7238	1.00877	5	20.4173	0.837025	5	13.668	1.11288	5	9.37092	1.23721	5	21.2739	1.06341	5	10.9069	874	97.5515	5.38916
	A2	Sequence	# PSMs	# Proteins	# Protein Groups	Protein Group Accessions	Modifications	ΔCn	(115+116)/(113+114)	(115+116)/(113+114) Count	(115+116)/(113+114) Variability [%]	(117+118)/(113+114)	(117+118)/(113+114) Count	(117+118)/(113+114) Variability [%]	(119+121)/(113+114)	(119+121)/(113+114) Count	(119+121)/(113+114) Variability [%]	114/113	114/113 Count	114/113 Variability [%]	115/116	115/116 Count	115/116 Variability [%]	117/118	117/118 Count	117/118 Variability [%]	119/121	119/121 Count	119/121 Variability [%]	IonScore	Exp Value	Charge	MH+ [Da]	ΔM [ppm]	RT [min]	# Missed Cleavages
	High	sIATLAITTLLk	1	1	1	Q4AEF8	N-Term(iTRAQ8plex); K12(iTRAQ8plex)	0	1.12307	1		0.875973	1		0.880223	1		0.763636	1		1.16584	1		0.947516	1		0.975013	1		82.53	7.26011e-09	2	1853.18	-7.32701	6.70143	0
	High	dSPLFDFIEScLR	1	1	1	Q4AEF8	N-Term(iTRAQ8plex); C11(Carbamidomethyl)	0	1.12489	1		1.03348	1		1.00877	1		1.02876	1		0.82302	1		1.2922	1		1.06341	1		56.76	6.11502e-06	2	1902.96	0.688645	8.86188	0
	High	vVLEHEEVR	3	1	1	Q4AEF8	N-Term(iTRAQ8plex)	0	1.26746	3	15.0105	1.17904	3	4.86036	1.15185	3	20.8248	0.837025	3	3.58783	1.11288	3	9.37092	1.23721	3	21.2739	1.10892	3	8.19815	39.21	0.00057576	3	1413.79	-7.92453	8.87219	0
P45592	Cofilin-1 OS=Rattus norvegicus GN=Cfl1 PE=1 SV=3 - [COF1_RAT]	433.463	30.12	1	4	4	16	1.27578	16	10.3455	1.44237	16	24.0066	0.916957	16	10.1574	0.918757	14	9.01005	0.981756	16	10.0574	1.06896	16	3.88779	0.892636	15	13.4207	166	18.5207	8.08936
	A2	Sequence	# PSMs	# Proteins	# Protein Groups	Protein Group Accessions	Modifications	ΔCn	(115+116)/(113+114)	(115+116)/(113+114) Count	(115+116)/(113+114) Variability [%]	(117+118)/(113+114)	(117+118)/(113+114) Count	(117+118)/(113+114) Variability [%]	(119+121)/(113+114)	(119+121)/(113+114) Count	(119+121)/(113+114) Variability [%]	114/113	114/113 Count	114/113 Variability [%]	115/116	115/116 Count	115/116 Variability [%]	117/118	117/118 Count	117/118 Variability [%]	119/121	119/121 Count	119/121 Variability [%]	IonScore	Exp Value	Charge	MH+ [Da]	ΔM [ppm]	RT [min]	# Missed Cleavages
	High	yALYDATYETk	12	1	1	P45592	N-Term(iTRAQ8plex); K11(iTRAQ8plex)	0	1.27578	12	10.3455	1.37303	12	24.0066	0.909734	12	10.0544	0.937503	11	7.29861	0.981756	12	6.77095	1.05776	12	3.73269	0.886383	11	12.4493	56.25	1.49397e-05	3	1946.04	1.66484	11.2653	0
	High	lGGSAVISLEGkPL	1	1	1	P45592	N-Term(iTRAQ8plex); K12(iTRAQ8plex)	0	1.28254	1		1.63154	1		1.05394	1		0.891869	1		1.17466	1		1.20082	1		0.988445	1		53.43	2.85983e-05	2	1949.18	-4.914	7.86418	0
	High	kEDLVFIFWAPESAPLk	2	1	1	P45592	N-Term(iTRAQ8plex); K1(iTRAQ8plex); K17(iTRAQ8plex)	0	1.4182	2	20.0791	2.05172	2	14.1617	1.75472	2	21.214	0.926343	1		0.691939	2	39.0911	1.51197	2	35.2054	0.763672	2	23.4477	34.51	0.00276118	3	2902.67	-5.25917	10.1679	1
	High	nIILEEGk	1	1	1	P45592	N-Term(iTRAQ8plex); K8(iTRAQ8plex)	0	1.14423	1		1.46137	1		0.865428	1		0.815966	1		1.04777	1		1.2149	1		0.942882	1		29.19	0.00861601	2	1523.92	-1.20202	9.96797	0
P86182	Coiled-coil domain-containing protein 22 OS=Rattus norvegicus GN=Ccdc22 PE=1 SV=2 - [CCD22_RAT]	33.6	1.75	1	1	1	1	1.08497	1		1.08078	1		1.29709	1		1.06576	1		0.90288	1		1.08551	1		0.861223	1		627	70.8109	6.11279
	A2	Sequence	# PSMs	# Proteins	# Protein Groups	Protein Group Accessions	Modifications	ΔCn	(115+116)/(113+114)	(115+116)/(113+114) Count	(115+116)/(113+114) Variability [%]	(117+118)/(113+114)	(117+118)/(113+114) Count	(117+118)/(113+114) Variability [%]	(119+121)/(113+114)	(119+121)/(113+114) Count	(119+121)/(113+114) Variability [%]	114/113	114/113 Count	114/113 Variability [%]	115/116	115/116 Count	115/116 Variability [%]	117/118	117/118 Count	117/118 Variability [%]	119/121	119/121 Count	119/121 Variability [%]	IonScore	Exp Value	Charge	MH+ [Da]	ΔM [ppm]	RT [min]	# Missed Cleavages
	High	aAQEEELESLR	1	1	1	P86182	N-Term(iTRAQ8plex)	0	1.08497	1		1.08078	1		1.29709	1		1.06576	1		0.90288	1		1.08551	1		0.861223	1		33.6	0.0019425	2	1578.84	5.78166	14.8529	0
Q5U2X6	Coiled-coil domain-containing protein 47 OS=Rattus norvegicus GN=Ccdc47 PE=2 SV=1 - [CCD47_RAT]	71.1466	4.97	1	2	2	2	1.1132	1		1.15431	1		1.06893	1		1.05336	1		1.09742	1		1.06579	2	20.8301	1.0307	2	4.37817	483	55.6972	4.84326
	A2	Sequence	# PSMs	# Proteins	# Protein Groups	Protein Group Accessions	Modifications	ΔCn	(115+116)/(113+114)	(115+116)/(113+114) Count	(115+116)/(113+114) Variability [%]	(117+118)/(113+114)	(117+118)/(113+114) Count	(117+118)/(113+114) Variability [%]	(119+121)/(113+114)	(119+121)/(113+114) Count	(119+121)/(113+114) Variability [%]	114/113	114/113 Count	114/113 Variability [%]	115/116	115/116 Count	115/116 Variability [%]	117/118	117/118 Count	117/118 Variability [%]	119/121	119/121 Count	119/121 Variability [%]	IonScore	Exp Value	Charge	MH+ [Da]	ΔM [ppm]	RT [min]	# Missed Cleavages
	High	eLLESNFTLVGDDGTNk	1	1	1	Q5U2X6	N-Term(iTRAQ8plex); K17(iTRAQ8plex)	0																0.927474	1		1.00072	1		60.65	8.69604e-06	3	2460.31	2.19292	17.0516	0
	High	lEEAALR	1	1	1	Q5U2X6	N-Term(iTRAQ8plex)	0	1.1132	1		1.15431	1		1.06893	1		1.05336	1		1.09742	1		1.22474	1		1.06157	1		31.65	0.00362473	2	1105.66	9.05479	12.0813	0
P18395	Cold shock domain-containing protein E1 OS=Rattus norvegicus GN=Csde1 PE=2 SV=1 - [CSDE1_RAT]	47.8882	1.38	1	1	1	2	1.09971	2	1.5686	1.19039	2	6.55038	1.05064	2	4.09681	1.01973	2	2.43231	1.08288	2	15.4376	1.07597	2	3.99064	0.967377	2	1.6665	798	88.8389	6.3667
	A2	Sequence	# PSMs	# Proteins	# Protein Groups	Protein Group Accessions	Modifications	ΔCn	(115+116)/(113+114)	(115+116)/(113+114) Count	(115+116)/(113+114) Variability [%]	(117+118)/(113+114)	(117+118)/(113+114) Count	(117+118)/(113+114) Variability [%]	(119+121)/(113+114)	(119+121)/(113+114) Count	(119+121)/(113+114) Variability [%]	114/113	114/113 Count	114/113 Variability [%]	115/116	115/116 Count	115/116 Variability [%]	117/118	117/118 Count	117/118 Variability [%]	119/121	119/121 Count	119/121 Variability [%]	IonScore	Exp Value	Charge	MH+ [Da]	ΔM [ppm]	RT [min]	# Missed Cleavages
	High	nITLDDASAPR	2	1	1	P18395	N-Term(iTRAQ8plex)	0	1.09971	2	1.5686	1.19039	2	6.55038	1.05064	2	4.09681	1.01973	2	2.43231	1.08288	2	15.4376	1.07597	2	3.99064	0.967377	2	1.6665	35.89	0.00072137	2	1476.78	-8.97143	13.5672	0
O35796	Complement component 1 Q subcomponent-binding protein, mitochondrial OS=Rattus norvegicus GN=C1qbp PE=1 SV=2 - [C1QBP_RAT]	73.6586	4.66	1	1	1	2	0.910889	2	2.32087	1.22248	2	4.53025	1.02866	2	21.0897	1.06014	2	17.4715	0.933249	2	4.62236	1.10525	2	4.87935	0.846639	2	9.45334	279	30.9775	4.86865
	A2	Sequence	# PSMs	# Proteins	# Protein Groups	Protein Group Accessions	Modifications	ΔCn	(115+116)/(113+114)	(115+116)/(113+114) Count	(115+116)/(113+114) Variability [%]	(117+118)/(113+114)	(117+118)/(113+114) Count	(117+118)/(113+114) Variability [%]	(119+121)/(113+114)	(119+121)/(113+114) Count	(119+121)/(113+114) Variability [%]	114/113	114/113 Count	114/113 Variability [%]	115/116	115/116 Count	115/116 Variability [%]	117/118	117/118 Count	117/118 Variability [%]	119/121	119/121 Count	119/121 Variability [%]	IonScore	Exp Value	Charge	MH+ [Da]	ΔM [ppm]	RT [min]	# Missed Cleavages
	High	eVSFQTTGDSEWR	2	1	1	O35796	N-Term(iTRAQ8plex)	0	0.910889	2	2.32087	1.22248	2	4.53025	1.02866	2	21.0897	1.06014	2	17.4715	0.933249	2	4.62236	1.10525	2	4.87935	0.846639	2	9.45334	46.84	3.31223e-05	2	1845.9	2.26802	19.248	0
P97834	COP9 signalosome complex subunit 1 OS=Rattus norvegicus GN=Gps1 PE=1 SV=1 - [CSN1_RAT]	83.8719	4.46	1	2	2	4	1.14902	4	3.4442	1.24428	4	5.21869	1.18101	4	13.1342	0.847916	3	11.6095	1.02527	4	8.71331	1.01858	4	15.9535	0.918812	4	8.54709	471	53.3941	6.84424
	A2	Sequence	# PSMs	# Proteins	# Protein Groups	Protein Group Accessions	Modifications	ΔCn	(115+116)/(113+114)	(115+116)/(113+114) Count	(115+116)/(113+114) Variability [%]	(117+118)/(113+114)	(117+118)/(113+114) Count	(117+118)/(113+114) Variability [%]	(119+121)/(113+114)	(119+121)/(113+114) Count	(119+121)/(113+114) Variability [%]	114/113	114/113 Count	114/113 Variability [%]	115/116	115/116 Count	115/116 Variability [%]	117/118	117/118 Count	117/118 Variability [%]	119/121	119/121 Count	119/121 Variability [%]	IonScore	Exp Value	Charge	MH+ [Da]	ΔM [ppm]	RT [min]	# Missed Cleavages
	High	lFLELEPQVR	3	1	1	P97834	N-Term(iTRAQ8plex)	0	1.15041	3	0.359209	1.2324	3	7.59541	1.1468	3	17.5716	0.815466	2	5.79016	1.04858	3	17.5261	0.99939	3	5.64508	0.91776	3	0.33985	38.04	0.00051822	2	1547.92	4.51989	10.2058	0
	High	aESTPEIAEQR	1	1	1	P97834	N-Term(iTRAQ8plex)	0	1.0982	1		1.25628	1		1.21625	1		1.00173	1		1.00248	1		1.27738	1		1.0297	1		36.07	0.00080331	2	1534.79	-7.9875	13.8853	0
P61203	COP9 signalosome complex subunit 2 OS=Rattus norvegicus GN=Cops2 PE=2 SV=1 - [CSN2_RAT]	73.8273	3.84	1	2	2	3	1.03034	3	4.64127	0.942697	3	19.5881	1.05546	3	0.0550538	0.953529	3	7.41663	1.21749	3	20.0227	1.10754	3	6.67965	0.832901	3	5.3813	443	51.5641	5.52881
	A2	Sequence	# PSMs	# Proteins	# Protein Groups	Protein Group Accessions	Modifications	ΔCn	(115+116)/(113+114)	(115+116)/(113+114) Count	(115+116)/(113+114) Variability [%]	(117+118)/(113+114)	(117+118)/(113+114) Count	(117+118)/(113+114) Variability [%]	(119+121)/(113+114)	(119+121)/(113+114) Count	(119+121)/(113+114) Variability [%]	114/113	114/113 Count	114/113 Variability [%]	115/116	115/116 Count	115/116 Variability [%]	117/118	117/118 Count	117/118 Variability [%]	119/121	119/121 Count	119/121 Variability [%]	IonScore	Exp Value	Charge	MH+ [Da]	ΔM [ppm]	RT [min]	# Missed Cleavages
	High	eHIEELLR	1	1	1	P61203	N-Term(iTRAQ8plex)	0	0.736448	1		0.791783	1		0.725297	1		0.756206	1		1.42716	1		1.16636	1		0.832901	1		40.95	0.000417834	3	1342.77	1.39156	13.3568	0
	High	nYDESGSPR	2	1	1	P61203	N-Term(iTRAQ8plex)	0	1.04659	2	2.3197	1.00645	2	9.72486	1.05565	2	0.0275269	0.977646	2	3.7045	1.13874	2	9.93751	1.0829	2	3.33704	0.886587	2	14.7172	33.5	0.000558354	2	1328.64	-1.70498	7.51189	0
Q68FS2	COP9 signalosome complex subunit 4 OS=Rattus norvegicus GN=Cops4 PE=2 SV=1 - [CSN4_RAT]	80.2926	2.96	1	1	1	3	1.11776	3	1.05889	1.06367	3	2.08611	1.03693	3	2.18478	1.02403	3	3.97443	0.938567	3	10.1338	1.03604	2	7.39226	0.979823	3	8.4549	406	46.2607	5.84619
	A2	Sequence	# PSMs	# Proteins	# Protein Groups	Protein Group Accessions	Modifications	ΔCn	(115+116)/(113+114)	(115+116)/(113+114) Count	(115+116)/(113+114) Variability [%]	(117+118)/(113+114)	(117+118)/(113+114) Count	(117+118)/(113+114) Variability [%]	(119+121)/(113+114)	(119+121)/(113+114) Count	(119+121)/(113+114) Variability [%]	114/113	114/113 Count	114/113 Variability [%]	115/116	115/116 Count	115/116 Variability [%]	117/118	117/118 Count	117/118 Variability [%]	119/121	119/121 Count	119/121 Variability [%]	IonScore	Exp Value	Charge	MH+ [Da]	ΔM [ppm]	RT [min]	# Missed Cleavages
	High	vISFEEQVASIR	3	1	1	Q68FS2	N-Term(iTRAQ8plex)	0	1.11776	3	1.05889	1.06367	3	2.08611	1.03693	3	2.18478	1.02403	3	3.97443	0.938567	3	10.1338	1.03604	2	7.39226	0.979823	3	8.4549	44.87	0.000232973	3	1681.95	7.31821	10.4826	0
Q6P4Z9	COP9 signalosome complex subunit 8 OS=Rattus norvegicus GN=Cops8 PE=2 SV=1 - [CSN8_RAT]	46	6.7	1	1	1	1	1.11657	1		1.18311	1		1.15015	1		0.981008	1		0.925659	1		1.16561	1		0.835734	1		209	23.221	5.19873
	A2	Sequence	# PSMs	# Proteins	# Protein Groups	Protein Group Accessions	Modifications	ΔCn	(115+116)/(113+114)	(115+116)/(113+114) Count	(115+116)/(113+114) Variability [%]	(117+118)/(113+114)	(117+118)/(113+114) Count	(117+118)/(113+114) Variability [%]	(119+121)/(113+114)	(119+121)/(113+114) Count	(119+121)/(113+114) Variability [%]	114/113	114/113 Count	114/113 Variability [%]	115/116	115/116 Count	115/116 Variability [%]	117/118	117/118 Count	117/118 Variability [%]	119/121	119/121 Count	119/121 Variability [%]	IonScore	Exp Value	Charge	MH+ [Da]	ΔM [ppm]	RT [min]	# Missed Cleavages
	High	gVLEQGWQADSTTR	1	1	1	Q6P4Z9	N-Term(iTRAQ8plex)	0	1.11657	1		1.18311	1		1.15015	1		0.981008	1		0.925659	1		1.16561	1		0.835734	1		46	8.28923e-05	2	1851.95	-1.87174	17.9497	0
Q3B7D0	Coproporphyrinogen-III oxidase, mitochondrial OS=Rattus norvegicus GN=Cpox PE=2 SV=1 - [HEM6_RAT]	49.7336	2.03	1	1	1	2	0.898979	2	2.3288	0.801224	2	2.58851	0.95682	2	1.60315	1.04511	2	5.0022	1.03679	2	14.7675	1.10606	2	3.81494	0.954486	2	6.11566	443	49.2466	8.52881
	A2	Sequence	# PSMs	# Proteins	# Protein Groups	Protein Group Accessions	Modifications	ΔCn	(115+116)/(113+114)	(115+116)/(113+114) Count	(115+116)/(113+114) Variability [%]	(117+118)/(113+114)	(117+118)/(113+114) Count	(117+118)/(113+114) Variability [%]	(119+121)/(113+114)	(119+121)/(113+114) Count	(119+121)/(113+114) Variability [%]	114/113	114/113 Count	114/113 Variability [%]	115/116	115/116 Count	115/116 Variability [%]	117/118	117/118 Count	117/118 Variability [%]	119/121	119/121 Count	119/121 Variability [%]	IonScore	Exp Value	Charge	MH+ [Da]	ΔM [ppm]	RT [min]	# Missed Cleavages
	High	eAEILEVLR	2	1	1	Q3B7D0	N-Term(iTRAQ8plex)	0	0.898979	2	2.3288	0.801224	2	2.58851	0.95682	2	1.60315	1.04511	2	5.0022	1.03679	2	14.7675	1.10606	2	3.81494	0.954486	2	6.11566	37.69	0.000731928	2	1375.82	6.11534	10.4823	0
Q02874	Core histone macro-H2A.1 OS=Rattus norvegicus GN=H2afy PE=1 SV=4 - [H2AY_RAT]	51.8199	5.12	1	2	2	2	0.980785	2	2.44651	0.778023	2	10.7215	1.43589	2	18.8964	0.825248	2	3.12848	0.99731	2	3.70506	0.51395	2	0.683914	1.152	2	3.02678	371	39.4794	9.78857
	A2	Sequence	# PSMs	# Proteins	# Protein Groups	Protein Group Accessions	Modifications	ΔCn	(115+116)/(113+114)	(115+116)/(113+114) Count	(115+116)/(113+114) Variability [%]	(117+118)/(113+114)	(117+118)/(113+114) Count	(117+118)/(113+114) Variability [%]	(119+121)/(113+114)	(119+121)/(113+114) Count	(119+121)/(113+114) Variability [%]	114/113	114/113 Count	114/113 Variability [%]	115/116	115/116 Count	115/116 Variability [%]	117/118	117/118 Count	117/118 Variability [%]	119/121	119/121 Count	119/121 Variability [%]	IonScore	Exp Value	Charge	MH+ [Da]	ΔM [ppm]	RT [min]	# Missed Cleavages
	High	dDLGSTLEk	1	1	1	Q02874	N-Term(iTRAQ8plex); K9(iTRAQ8plex)	0	0.964736	1		0.836197	1		1.62926	1		0.808021	1		0.972704	1		0.516327	1		1.12873	1		34.67	0.00196186	2	1585.87	-9.25036	13.8274	0
	High	eFVEAVLELR	1	1	1	Q02874	N-Term(iTRAQ8plex)	0	0.997102	1		0.723896	1		1.26548	1		0.842842	1		1.02254	1		0.511585	1		1.17576	1		33.65	0.00168292	2	1508.86	-5.0457	22.3037	0
O35828	Coronin-7 (Fragment) OS=Rattus norvegicus GN=Coro7 PE=2 SV=1 - [CORO7_RAT]	68.2772	6.32	1	2	2	3	0.947897	3	4.09029	0.842401	3	10.5477	0.740248	3	7.59168	0.942989	3	0.935064	0.941326	3	6.4865	1.0674	3	2.69233	0.872419	3	0.783917	443	48.872	5.66846
	A2	Sequence	# PSMs	# Proteins	# Protein Groups	Protein Group Accessions	Modifications	ΔCn	(115+116)/(113+114)	(115+116)/(113+114) Count	(115+116)/(113+114) Variability [%]	(117+118)/(113+114)	(117+118)/(113+114) Count	(117+118)/(113+114) Variability [%]	(119+121)/(113+114)	(119+121)/(113+114) Count	(119+121)/(113+114) Variability [%]	114/113	114/113 Count	114/113 Variability [%]	115/116	115/116 Count	115/116 Variability [%]	117/118	117/118 Count	117/118 Variability [%]	119/121	119/121 Count	119/121 Variability [%]	IonScore	Exp Value	Charge	MH+ [Da]	ΔM [ppm]	RT [min]	# Missed Cleavages
	High	sSPLPLQDGPGPEGGR	1	1	1	O35828	N-Term(iTRAQ8plex)	0	1.11345	1		1.01565	1		0.740248	1		1.07722	1		0.941326	1		1.0979	1		0.877044	1		47.67	7.60957e-05	2	1867.96	-8.95089	11.0038	0
	High	tEcDIQDVEFAR	2	1	1	O35828	N-Term(iTRAQ8plex); C3(Carbamidomethyl)	0	0.934916	2	2.0445	0.813042	2	5.26291	0.732187	2	9.22358	0.94002	2	0.467524	0.950827	2	7.98129	1.05776	2	1.34598	0.86117	2	1.92428	27.34	0.00221402	2	1786.84	-8.56266	21.2765	0
P07335	Creatine kinase B-type OS=Rattus norvegicus GN=Ckb PE=1 SV=2 - [KCRB_RAT]	321.729	24.41	1	6	7	13	1.7252	8	28.1682	4.80108	8	61.3032	4.52068	8	69.4667	0.870011	8	15.9526	0.822802	8	16.4247	1.10723	11	6.70005	1.07527	10	14.0535	381	42.6983	5.66846
	A2	Sequence	# PSMs	# Proteins	# Protein Groups	Protein Group Accessions	Modifications	ΔCn	(115+116)/(113+114)	(115+116)/(113+114) Count	(115+116)/(113+114) Variability [%]	(117+118)/(113+114)	(117+118)/(113+114) Count	(117+118)/(113+114) Variability [%]	(119+121)/(113+114)	(119+121)/(113+114) Count	(119+121)/(113+114) Variability [%]	114/113	114/113 Count	114/113 Variability [%]	115/116	115/116 Count	115/116 Variability [%]	117/118	117/118 Count	117/118 Variability [%]	119/121	119/121 Count	119/121 Variability [%]	IonScore	Exp Value	Charge	MH+ [Da]	ΔM [ppm]	RT [min]	# Missed Cleavages
	High	tFLVWINEEDHLR	3	1	1	P07335	N-Term(iTRAQ8plex)	0	1.62973	3	10.605	3.07582	3	1.96962	2.73058	3	1.40243	0.861469	3	2.11582	0.827307	3	6.52368	0.998368	3	12.7547	1.16102	3	1.4733	58.18	8.66712e-06	3	1976.04	-6.92179	4.93533	0
	High	dLFDPIIEDR	2	1	1	P07335	N-Term(iTRAQ8plex)	0	1.90753	2	17.1553	6.85118	2	25.4495	7.44555	2	23.5337	0.968192	2	4.93235	0.694513	2	7.89843	1.1566	2	0.225815	1.066	2	2.40724	56.51	1.07211e-05	2	1536.81	-4.10223	18.2156	0
	High	lGFSEVELVQMVVDGVk	2	1	1	P07335	N-Term(iTRAQ8plex); K17(iTRAQ8plex)	0													1.89018	1		1.19569	2	7.00994	2.13217	2	9.22738	50.89	6.31396e-05	3	2457.39	-1.06412	12.0295	0
	High	vLTPELYAELR	2	1	1	P07335	N-Term(iTRAQ8plex)	0	2.72996	2	6.99207	6.22976	2	8.3451	5.90455	2	5.75221	0.81625	2	38.4696	0.89906	2	14.0185	1.14347	2	5.03773	0.958207	2	1.96794	41.3	0.000344709	2	1607.93	2.14843	16.0961	0
	High	gTGGVDTAAVGGVFDVSNADR	1	1	1	P07335	N-Term(iTRAQ8plex)	0																1.00896	1		1.06716	1		39.51	0.000453372	2	2269.13	-2.37727	21.9805	0
	High	lEQGQPIDDLMPAQk	1	1	1	P07335	N-Term(iTRAQ8plex); K15(iTRAQ8plex)	0	0.585915	1		1.29451	1		0.795162	1		0.591118	1					1.10723	1					34.25	0.00281878	3	2291.26	1.40586	20.85	0
	High	dWPDAR	2	2	2	P25809;P07335	N-Term(iTRAQ8plex)	0																						18.7	0.0134577	2	1063.54	-7.70929	14.6776	0
P25809	Creatine kinase U-type, mitochondrial OS=Rattus norvegicus GN=Ckmt1 PE=1 SV=1 - [KCRU_RAT]	167.307	11.24	1	4	5	9	0.846708	7	5.65602	0.911574	7	10.7855	0.993669	7	5.74454	1.04361	7	3.00652	1.03078	7	12.1237	1.03983	7	3.05071	0.972024	7	4.41849	418	46.9993	8.48486
	A2	Sequence	# PSMs	# Proteins	# Protein Groups	Protein Group Accessions	Modifications	ΔCn	(115+116)/(113+114)	(115+116)/(113+114) Count	(115+116)/(113+114) Variability [%]	(117+118)/(113+114)	(117+118)/(113+114) Count	(117+118)/(113+114) Variability [%]	(119+121)/(113+114)	(119+121)/(113+114) Count	(119+121)/(113+114) Variability [%]	114/113	114/113 Count	114/113 Variability [%]	115/116	115/116 Count	115/116 Variability [%]	117/118	117/118 Count	117/118 Variability [%]	119/121	119/121 Count	119/121 Variability [%]	IonScore	Exp Value	Charge	MH+ [Da]	ΔM [ppm]	RT [min]	# Missed Cleavages
	High	sFLIWVNEEDHTR	3	1	1	P25809	N-Term(iTRAQ8plex)	0	0.853443	3	1.17473	0.917747	3	1.0007	1.02324	3	2.39308	1.02266	3	3.00652	1.14411	3	0.868326	1.05461	3	0.789707	0.972024	3	2.54423	54.43	1.91107e-05	2	1950.01	2.903	7.52025	0
	High	lYPPSAEYPDLR	1	1	1	P25809	N-Term(iTRAQ8plex)	0	0.985305	1		0.980153	1		1.21618	1		1.03609	1		1.03078	1		1.2017	1		0.986472	1		34.89	0.00100545	2	1724.92	0.609048	11.7462	0
	High	sGYFDER	2	1	1	P25809	N-Term(iTRAQ8plex)	0	0.665924	2	5.39962	0.626738	2	4.53471	0.938084	2	2.79529	1.06253	2	0.411444	0.97332	2	3.57696	1.01837	2	0.0415154	0.876982	2	7.30951	23.3	0.00466627	2	1177.57	-8.15722	10.6311	0
	High	gWEFMWNER	1	1	1	P25809	N-Term(iTRAQ8plex)	0	0.81504	1		0.79698	1		0.993669	1		1.12964	1		1.02747	1		1.03983	1		1.00141	1		22.23	0.00658253	2	1558.75	5.73056	8.89005	0
	High	dWPDAR	2	2	2	P25809;P07335	N-Term(iTRAQ8plex)	0																						18.7	0.0134577	2	1063.54	-7.70929	14.6776	0
Q5U2U2	Crk-like protein OS=Rattus norvegicus GN=Crkl PE=1 SV=1 - [CRKL_RAT]	20.67	1.98	1	1	1	1	0.825977	1		0.851641	1		0.93762	1		1.35407	1		1.19387	1		0.908696	1		0.848462	1		303	33.844	6.7417
	A2	Sequence	# PSMs	# Proteins	# Protein Groups	Protein Group Accessions	Modifications	ΔCn	(115+116)/(113+114)	(115+116)/(113+114) Count	(115+116)/(113+114) Variability [%]	(117+118)/(113+114)	(117+118)/(113+114) Count	(117+118)/(113+114) Variability [%]	(119+121)/(113+114)	(119+121)/(113+114) Count	(119+121)/(113+114) Variability [%]	114/113	114/113 Count	114/113 Variability [%]	115/116	115/116 Count	115/116 Variability [%]	117/118	117/118 Count	117/118 Variability [%]	119/121	119/121 Count	119/121 Variability [%]	IonScore	Exp Value	Charge	MH+ [Da]	ΔM [ppm]	RT [min]	# Missed Cleavages
	High	fDSSDR	1	1	1	Q5U2U2	N-Term(iTRAQ8plex)	0	0.825977	1		0.851641	1		0.93762	1		1.35407	1		1.19387	1		0.908696	1		0.848462	1		20.67	0.00855008	2	1030.51	-3.46783	15.6622	0
P97536	Cullin-associated NEDD8-dissociated protein 1 OS=Rattus norvegicus GN=Cand1 PE=1 SV=1 - [CAND1_RAT]	334.042	7.8	1	8	8	14	1.05207	14	5.64279	1.16904	14	9.3376	1.1211	14	6.57133	0.961344	14	12.4614	0.978257	14	7.23516	1.04743	14	6.75667	0.934106	14	9.42998	1230	136.275	5.78271
	A2	Sequence	# PSMs	# Proteins	# Protein Groups	Protein Group Accessions	Modifications	ΔCn	(115+116)/(113+114)	(115+116)/(113+114) Count	(115+116)/(113+114) Variability [%]	(117+118)/(113+114)	(117+118)/(113+114) Count	(117+118)/(113+114) Variability [%]	(119+121)/(113+114)	(119+121)/(113+114) Count	(119+121)/(113+114) Variability [%]	114/113	114/113 Count	114/113 Variability [%]	115/116	115/116 Count	115/116 Variability [%]	117/118	117/118 Count	117/118 Variability [%]	119/121	119/121 Count	119/121 Variability [%]	IonScore	Exp Value	Charge	MH+ [Da]	ΔM [ppm]	RT [min]	# Missed Cleavages
	High	eGPAVVGQFIQDVk	1	1	1	P97536	N-Term(iTRAQ8plex); K14(iTRAQ8plex)	0	1.08572	1		1.28995	1		1.21997	1		0.796565	1		1.04605	1		1.10528	1		0.871552	1		72.49	4.05819e-07	2	2095.21	5.20053	9.51912	0
	High	iSGSILNELIGLVR	1	1	1	P97536	N-Term(iTRAQ8plex)	0	1.07917	1		1.05228	1		1.0529	1		0.7028	1		0.982007	1		0.882628	1		0.994477	1		61.1	4.57986e-06	2	1788.09	-0.229464	5.36494	0
	High	aADIDQEVk	1	1	1	P97536	N-Term(iTRAQ8plex); K9(iTRAQ8plex)	0	0.97507	1		1.18519	1		1.09353	1		0.867842	1		1.12931	1		1.16563	1		0.857425	1		47.76	8.37471e-05	2	1596.89	-9.33868	13.8062	0
	High	lTLIDPETLLPR	6	1	1	P97536	N-Term(iTRAQ8plex)	0	1.05207	6	2.15849	1.16904	6	2.33442	1.1211	6	5.70434	0.925836	6	9.67504	0.961358	6	1.61531	1.07201	6	3.43999	0.959627	6	4.78053	44.95	0.000159945	2	1685	-6.12043	19.6172	0
	High	eYcIQAFESFVR	1	1	1	P97536	N-Term(iTRAQ8plex); C3(Carbamidomethyl)	0	1.073	1		0.882403	1		1.07205	1		1.03009	1		0.924269	1		1.02813	1		0.93399	1		42.87	0.000170417	2	1852.94	8.64343	10.6985	0
	High	sVILEAFSSPSEEVk	1	1	1	P97536	N-Term(iTRAQ8plex); K15(iTRAQ8plex)	0	0.856187	1		1.24032	1		1.15834	1		1.70304	1		1.13058	1		0.89293	1		0.79244	1		41.63	0.000542784	3	2230.24	-0.0961653	17.4197	0
	High	fcNVDDDELR	1	1	1	P97536	N-Term(iTRAQ8plex); C2(Carbamidomethyl)	0	1.1729	1		1.18779	1		1.21061	1		1.00189	1		1.09245	1		1.03844	1		1.04011	1		31.28	0.000744732	2	1586.76	8.59721	19.334	0
	High	tLEDPDLNVR	2	1	1	P97536	N-Term(iTRAQ8plex)	0	0.904433	2	15.9084	0.890863	2	31.148	1.03392	2	14.6113	0.979936	2	3.46291	1.03871	2	4.88683	0.916239	2	15.6047	0.813204	2	20.788	29.06	0.00564952	2	1475.81	8.89616	17.5143	0
P63255	Cysteine-rich protein 1 OS=Rattus norvegicus GN=Crip1 PE=1 SV=2 - [CRIP1_RAT]	52.2612	20.78	1	2	2	3	1.27285	3	5.41946	1.43378	3	9.15434	0.941368	3	6.60527	1.10385	3	2.7844	0.940755	3	11.7148	1.18424	3	4.94963	0.912659	3	3.61395	77	8.54399	8.57275
	A2	Sequence	# PSMs	# Proteins	# Protein Groups	Protein Group Accessions	Modifications	ΔCn	(115+116)/(113+114)	(115+116)/(113+114) Count	(115+116)/(113+114) Variability [%]	(117+118)/(113+114)	(117+118)/(113+114) Count	(117+118)/(113+114) Variability [%]	(119+121)/(113+114)	(119+121)/(113+114) Count	(119+121)/(113+114) Variability [%]	114/113	114/113 Count	114/113 Variability [%]	115/116	115/116 Count	115/116 Variability [%]	117/118	117/118 Count	117/118 Variability [%]	119/121	119/121 Count	119/121 Variability [%]	IonScore	Exp Value	Charge	MH+ [Da]	ΔM [ppm]	RT [min]	# Missed Cleavages
	High	eVYFAER	2	1	1	P63255	N-Term(iTRAQ8plex)	0	1.18558	2	10.5602	1.51496	2	8.17977	0.96255	2	3.29994	1.05703	2	6.43192	0.904434	2	5.84241	1.23602	2	11.3273	0.923847	2	1.80653	34.11	0.0013003	2	1217.66	6.99684	10.9058	0
	High	gGAESHTFk	1	1	1	P63255	N-Term(iTRAQ8plex); K9(iTRAQ8plex)	0	1.3202	1		1.3481	1		0.807402	1		1.12477	1		1.04319	1		1.18424	1		0.869543	1		28.09	0.00729622	2	1541.84	-8.88949	8.61492	0
Q68FY0	Cytochrome b-c1 complex subunit 1, mitochondrial OS=Rattus norvegicus GN=Uqcrc1 PE=1 SV=1 - [QCR1_RAT]	165.303	10.42	1	4	4	6	1.11499	6	1.59429	1.32898	6	8.54158	1.40692	6	13.2048	0.991724	6	6.85094	1.01069	6	9.06639	1.07482	6	6.34826	1.03861	6	7.17094	480	52.8154	5.88428
	A2	Sequence	# PSMs	# Proteins	# Protein Groups	Protein Group Accessions	Modifications	ΔCn	(115+116)/(113+114)	(115+116)/(113+114) Count	(115+116)/(113+114) Variability [%]	(117+118)/(113+114)	(117+118)/(113+114) Count	(117+118)/(113+114) Variability [%]	(119+121)/(113+114)	(119+121)/(113+114) Count	(119+121)/(113+114) Variability [%]	114/113	114/113 Count	114/113 Variability [%]	115/116	115/116 Count	115/116 Variability [%]	117/118	117/118 Count	117/118 Variability [%]	119/121	119/121 Count	119/121 Variability [%]	IonScore	Exp Value	Charge	MH+ [Da]	ΔM [ppm]	RT [min]	# Missed Cleavages
	High	nALISHLDGTTPVcEDIGR	1	1	1	Q68FY0	N-Term(iTRAQ8plex); C14(Carbamidomethyl)	0	1.12177	1		1.08988	1		1.14853	1		1.07339	1		1.84579	1		1.01091	1		1.36677	1		95.01	2.3347e-09	2	2372.22	-0.689215	6.09893	0
	High	lcTSATESEVTR	2	1	1	Q68FY0	N-Term(iTRAQ8plex); C2(Carbamidomethyl)	0	1.09477	2	3.7391	1.23801	2	7.35887	1.36794	2	5.97122	0.923809	2	9.9698	0.959927	2	4.61392	1.08153	2	5.45091	1.04787	2	10.7109	37.4	0.000445827	2	1657.82	-8.27446	12.1627	0
	High	iEEVDAQMVR	1	1	1	Q68FY0	N-Term(iTRAQ8plex)	0	1.05849	1		1.44292	1		1.38994	1		1.03469	1		1.05336	1		1.12158	1		1.00444	1		34.61	0.00143565	2	1493.79	-0.86851	14.5521	0
	High	tDLTDYLSR	2	1	1	Q68FY0	N-Term(iTRAQ8plex)	0	1.11976	2	1.53152	1.36541	2	0.846645	1.57547	2	0.611609	0.969157	2	3.98651	0.980691	2	7.50749	1.04677	2	8.46012	1.03861	2	1.99668	28.19	0.0044753	2	1387.74	0.818222	15.3606	0
P32551	Cytochrome b-c1 complex subunit 2, mitochondrial OS=Rattus norvegicus GN=Uqcrc2 PE=1 SV=2 - [QCR2_RAT]	29.12	2.21	1	1	1	1	1.02631	1		1.09067	1		1.06803	1		0.945339	1		1.0814	1		1.20541	1		1.02125	1		452	48.3662	9.14404
	A2	Sequence	# PSMs	# Proteins	# Protein Groups	Protein Group Accessions	Modifications	ΔCn	(115+116)/(113+114)	(115+116)/(113+114) Count	(115+116)/(113+114) Variability [%]	(117+118)/(113+114)	(117+118)/(113+114) Count	(117+118)/(113+114) Variability [%]	(119+121)/(113+114)	(119+121)/(113+114) Count	(119+121)/(113+114) Variability [%]	114/113	114/113 Count	114/113 Variability [%]	115/116	115/116 Count	115/116 Variability [%]	117/118	117/118 Count	117/118 Variability [%]	119/121	119/121 Count	119/121 Variability [%]	IonScore	Exp Value	Charge	MH+ [Da]	ΔM [ppm]	RT [min]	# Missed Cleavages
	High	eVAEQFLNIR	1	1	1	P32551	N-Term(iTRAQ8plex)	0	1.02631	1		1.09067	1		1.06803	1		0.945339	1		1.0814	1		1.20541	1		1.02125	1		29.12	0.00502093	2	1522.85	-2.76242	9.69696	0
P20788	Cytochrome b-c1 complex subunit Rieske, mitochondrial OS=Rattus norvegicus GN=Uqcrfs1 PE=1 SV=2 - [UCRI_RAT]	39.43	5.11	1	1	1	1	0.882713	1		1.18488	1		1.31837	1		0.961038	1		1.1586	1		1.16797	1		0.885081	1		274	29.4272	8.86572
	A2	Sequence	# PSMs	# Proteins	# Protein Groups	Protein Group Accessions	Modifications	ΔCn	(115+116)/(113+114)	(115+116)/(113+114) Count	(115+116)/(113+114) Variability [%]	(117+118)/(113+114)	(117+118)/(113+114) Count	(117+118)/(113+114) Variability [%]	(119+121)/(113+114)	(119+121)/(113+114) Count	(119+121)/(113+114) Variability [%]	114/113	114/113 Count	114/113 Variability [%]	115/116	115/116 Count	115/116 Variability [%]	117/118	117/118 Count	117/118 Variability [%]	119/121	119/121 Count	119/121 Variability [%]	IonScore	Exp Value	Charge	MH+ [Da]	ΔM [ppm]	RT [min]	# Missed Cleavages
	High	eIDQEAAVEVSQLR	1	1	1	P20788	N-Term(iTRAQ8plex)	0	0.882713	1		1.18488	1		1.31837	1		0.961038	1		1.1586	1		1.16797	1		0.885081	1		39.43	0.000855187	2	1891.01	0.910399	21.8255	0
Q91Y94	Cytochrome c oxidase subunit 4 isoform 2, mitochondrial OS=Rattus norvegicus GN=Cox4i2 PE=2 SV=1 - [COX42_RAT]	160.362	15.12	1	2	2	4	0.929638	3	3.13745	0.990248	3	3.73686	0.737312	3	18.4497	1.26272	3	11.1469	1.03665	3	6.70955	1.24786	3	6.14377	0.938933	3	9.29112	172	20.1571	9.42236
	A2	Sequence	# PSMs	# Proteins	# Protein Groups	Protein Group Accessions	Modifications	ΔCn	(115+116)/(113+114)	(115+116)/(113+114) Count	(115+116)/(113+114) Variability [%]	(117+118)/(113+114)	(117+118)/(113+114) Count	(117+118)/(113+114) Variability [%]	(119+121)/(113+114)	(119+121)/(113+114) Count	(119+121)/(113+114) Variability [%]	114/113	114/113 Count	114/113 Variability [%]	115/116	115/116 Count	115/116 Variability [%]	117/118	117/118 Count	117/118 Variability [%]	119/121	119/121 Count	119/121 Variability [%]	IonScore	Exp Value	Charge	MH+ [Da]	ΔM [ppm]	RT [min]	# Missed Cleavages
	High	sYPMPDEPYcTELSEEQR	3	1	1	Q91Y94	N-Term(iTRAQ8plex); C10(Carbamidomethyl)	0	0.919856	2	1.56843	0.968854	2	6.98219	0.693194	2	9.16696	1.31094	2	5.56053	1.01233	2	10.2487	1.29174	2	5.12703	0.939587	2	9.39501	62.74	5.30848e-07	2	2535.13	0.0814622	21.1028	0
	High	vVTLTEER	1	1	1	Q91Y94	N-Term(iTRAQ8plex)	0	1.02344	1		0.990248	1		0.855638	1		0.947279	1		1.03665	1		1.19726	1		0.938933	1		29.45	0.00312128	2	1250.73	6.99858	9.7852	0
P11240	Cytochrome c oxidase subunit 5A, mitochondrial OS=Rattus norvegicus GN=Cox5a PE=1 SV=1 - [COX5A_RAT]	67.9725	10.96	1	2	2	4	0.948335	4	8.60115	1.17098	4	13.9149	0.955446	4	3.50645	0.956556	4	8.79964	1.00947	4	5.51132	1.12937	4	3.97334	0.989898	4	4.0857	146	16.1193	6.53662
	A2	Sequence	# PSMs	# Proteins	# Protein Groups	Protein Group Accessions	Modifications	ΔCn	(115+116)/(113+114)	(115+116)/(113+114) Count	(115+116)/(113+114) Variability [%]	(117+118)/(113+114)	(117+118)/(113+114) Count	(117+118)/(113+114) Variability [%]	(119+121)/(113+114)	(119+121)/(113+114) Count	(119+121)/(113+114) Variability [%]	114/113	114/113 Count	114/113 Variability [%]	115/116	115/116 Count	115/116 Variability [%]	117/118	117/118 Count	117/118 Variability [%]	119/121	119/121 Count	119/121 Variability [%]	IonScore	Exp Value	Charge	MH+ [Da]	ΔM [ppm]	RT [min]	# Missed Cleavages
	High	lnDFASAVR	2	1	1	P11240	N-Term(iTRAQ8plex); N2(Deamidated)	0	0.89498	2	3.6287	1.04825	2	6.74162	0.918586	2	8.35923	1.0016	2	11.5016	0.953678	2	5.55296	1.08345	2	6.05354	1.04592	2	5.39395	29.82	0.00203252	2	1297.7	-1.43214	17.5445	0
	High	iIDAALR	2	1	1	P11240	N-Term(iTRAQ8plex)	0	1.01889	2	5.68563	1.28563	2	4.16861	0.96187	2	3.50645	0.93021	2	8.79964	1.04768	2	2.62652	1.16004	2	3.8669	0.963002	2	1.31219	28.89	0.00232419	2	1075.67	-2.55369	7.0716	0
P62898	Cytochrome c, somatic OS=Rattus norvegicus GN=Cycs PE=1 SV=2 - [CYC_RAT]	46.78	16.19	1	1	1	1	3.39596	1		4.02813	1		2.51182	1					1.38224	1		0.447848	1		0.595961	1		105	11.598	9.5835
	A2	Sequence	# PSMs	# Proteins	# Protein Groups	Protein Group Accessions	Modifications	ΔCn	(115+116)/(113+114)	(115+116)/(113+114) Count	(115+116)/(113+114) Variability [%]	(117+118)/(113+114)	(117+118)/(113+114) Count	(117+118)/(113+114) Variability [%]	(119+121)/(113+114)	(119+121)/(113+114) Count	(119+121)/(113+114) Variability [%]	114/113	114/113 Count	114/113 Variability [%]	115/116	115/116 Count	115/116 Variability [%]	117/118	117/118 Count	117/118 Variability [%]	119/121	119/121 Count	119/121 Variability [%]	IonScore	Exp Value	Charge	MH+ [Da]	ΔM [ppm]	RT [min]	# Missed Cleavages
	High	gITWGEDTLMEYLENPk	1	1	1	P62898	N-Term(iTRAQ8plex); K17(iTRAQ8plex)	0	3.39596	1		4.02813	1		2.51182	1					1.38224	1		0.447848	1		0.595961	1		46.78	0.000154272	3	2604.34	-4.05516	13.2592	0
P97696	Cytohesin-3 OS=Rattus norvegicus GN=Cyth3 PE=2 SV=1 - [CYH3_RAT]	58.88	3.5	1	1	1	1	1.62095	1		1.72516	1		1.86354	1		0.977464	1		1.00688	1		0.983027	1		0.797146	1		400	46.3074	5.5415
	A2	Sequence	# PSMs	# Proteins	# Protein Groups	Protein Group Accessions	Modifications	ΔCn	(115+116)/(113+114)	(115+116)/(113+114) Count	(115+116)/(113+114) Variability [%]	(117+118)/(113+114)	(117+118)/(113+114) Count	(117+118)/(113+114) Variability [%]	(119+121)/(113+114)	(119+121)/(113+114) Count	(119+121)/(113+114) Variability [%]	114/113	114/113 Count	114/113 Variability [%]	115/116	115/116 Count	115/116 Variability [%]	117/118	117/118 Count	117/118 Variability [%]	119/121	119/121 Count	119/121 Variability [%]	IonScore	Exp Value	Charge	MH+ [Da]	ΔM [ppm]	RT [min]	# Missed Cleavages
	High	gINEGGDLPEELLR	1	1	1	P97696	N-Term(iTRAQ8plex)	0	1.62095	1		1.72516	1		1.86354	1		0.977464	1		1.00688	1		0.983027	1		0.797146	1		58.88	6.08272e-06	2	1815.97	-1.0479	15.8069	0
P38650	Cytoplasmic dynein 1 heavy chain 1 OS=Rattus norvegicus GN=Dync1h1 PE=2 SV=1 - [DYHC1_RAT]	1165.6	6.07	1	27	27	52	1.43169	50	10.1258	1.40476	51	16.7977	1.48313	50	12.3999	0.85395	47	14.8155	1.00681	49	11.9522	0.956242	49	13.2812	1.02116	50	7.80794	4644	531.916	6.45557
	A2	Sequence	# PSMs	# Proteins	# Protein Groups	Protein Group Accessions	Modifications	ΔCn	(115+116)/(113+114)	(115+116)/(113+114) Count	(115+116)/(113+114) Variability [%]	(117+118)/(113+114)	(117+118)/(113+114) Count	(117+118)/(113+114) Variability [%]	(119+121)/(113+114)	(119+121)/(113+114) Count	(119+121)/(113+114) Variability [%]	114/113	114/113 Count	114/113 Variability [%]	115/116	115/116 Count	115/116 Variability [%]	117/118	117/118 Count	117/118 Variability [%]	119/121	119/121 Count	119/121 Variability [%]	IonScore	Exp Value	Charge	MH+ [Da]	ΔM [ppm]	RT [min]	# Missed Cleavages
	High	iAFIMDESNVLDSGFLER	1	1	1	P38650	N-Term(iTRAQ8plex)	0	1.48007	1		1.92263	1		1.61303	1		1.00842	1		1.16123	1		0.9659	1		0.986743	1		69.73	7.12976e-07	2	2360.21	0.0796282	9.49783	0
	High	vQVALEELQDLk	9	1	1	P38650	N-Term(iTRAQ8plex); K12(iTRAQ8plex)	0	1.37647	9	9.3972	1.4293	9	17.4438	1.39878	9	5.29446	0.767162	9	17.363	1.03611	9	15.7304	0.956776	9	10.8092	1.19464	9	32.8715	67.47	1.40563e-06	2	1993.17	-6.92495	11.7415	0
	High	qDLADVVQVcEGk	4	1	1	P38650	N-Term(iTRAQ8plex); C10(Carbamidomethyl); K13(iTRAQ8plex)	0	1.24278	4	36.6451	1.27317	4	24.5443	1.19035	4	18.7747	1.03053	4	17.9549	1.12907	4	12.1711	1.12969	4	12.2116	1.1176	4	31.3229	65.49	2.11866e-06	2	2069.12	0.710351	15.5733	0
	High	aDLIFTVDFEIATk	2	1	1	P38650	N-Term(iTRAQ8plex); K14(iTRAQ8plex)	0	2.34662	2	68.0339	2.79119	2	47.5041	1.91198	2	64.3196	0.630973	1		1.04007	2	45.1922	0.743228	2	39.9646	0.920115	2	50.4108	65.23	2.57928e-06	3	2191.23	-9.02336	13.6952	0
	High	lEGVEGVAHIIDPk	3	1	1	P38650	N-Term(iTRAQ8plex); K14(iTRAQ8plex)	0	1.19624	3	8.65368	1.47713	3	8.738	1.5927	3	12.6584	0.756987	3	10.7229	1.40875	3	10.3579	0.898204	3	5.17411	0.982091	3	1.04042	63.8	2.02182e-06	2	2085.23	5.33053	8.83955	0
	High	vDDLLIIEEk	2	1	1	P38650	N-Term(iTRAQ8plex); K10(iTRAQ8plex)	0	1.47152	2	1.98029	1.61275	2	4.78222	1.62985	2	8.46991	0.681324	2	41.2983	1.11187	2	11.8222	1.15099	2	0.713055	1.01372	2	2.23838	56.35	1.55265e-05	2	1795.08	5.15543	10.4391	0
	High	fYFVGDEDLLEIIGNSk	1	1	1	P38650	N-Term(iTRAQ8plex); K17(iTRAQ8plex)	0	0.983163	1		1.73855	1		1.22835	1		0.612825	1		0.810777	1		0.622481	1		1.01906	1		51.01	6.89476e-05	3	2567.37	-7.45753	14.0694	0
	High	gIFEALRPLETLPVEGLIR	1	1	1	P38650	N-Term(iTRAQ8plex)	0	2.4537	1		2.69011	1		2.79003	1					1.15556	1		0.876871	1		0.917729	1		47.4	0.000103723	2	2427.43	1.10661	5.41108	0
	High	tEYLSNADER	2	1	1	P38650	N-Term(iTRAQ8plex)	0	1.6121	2	4.28828	1.43981	2	7.18213	1.51371	2	4.67802	0.842962	2	1.92021	0.958955	2	8.04618	0.848058	2	10.7061	1.11677	2	6.7896	42.28	8.87342e-05	2	1501.73	-6.61311	13.8629	0
	High	iNEWLTLVEk	1	1	1	P38650	N-Term(iTRAQ8plex); K10(iTRAQ8plex)	0	1.11292	1		1.89238	1		1.72033	1		0.652464	1		0.880282	1		1.17227	1		0.904827	1		37.21	0.00114065	3	1853.08	-8.70294	9.5818	0
	High	tTDLLTDWEk	3	1	1	P38650	N-Term(iTRAQ8plex); K10(iTRAQ8plex)	0	1.64399	2	50.4976	1.58747	2	31.7845	2.09715	2	40.5608	0.684284	1		1.00681	1		1.70892	1		0.926191	2	45.1328	36	0.00168296	3	1830	-5.56938	11.4936	0
	High	sAcDTVDTWLDDTAk	1	1	1	P38650	N-Term(iTRAQ8plex); C3(Carbamidomethyl); K15(iTRAQ8plex)	0				1.57204	1																	34.88	0.00118657	3	2306.13	-5.34828	12.9118	0
	High	yEFGESDLR	1	1	1	P38650	N-Term(iTRAQ8plex)	0	1.40928	1		1.22975	1		1.35041	1		0.914889	1		1.01324	1		1.06573	1		1.00905	1		34.84	0.000360905	2	1419.72	7.19065	15.0477	0
	High	dLEASIAR	1	1	1	P38650	N-Term(iTRAQ8plex)	0	1.51167	1		1.29242	1		1.39894	1		0.8851	1		0.977615	1		0.820016	1		1.06363	1		33.48	0.00332072	2	1178.66	-8.61373	11.5344	0
	High	gTFDNAETk	1	1	1	P38650	N-Term(iTRAQ8plex); K9(iTRAQ8plex)	0	1.38051	1		1.41321	1		1.37641	1		0.830738	1		0.872615	1		1.04545	1		1.00481	1		32.51	0.00218809	2	1590.85	-7.47913	9.96081	0
	High	eTVDQVEELRR	2	1	1	P38650	N-Term(iTRAQ8plex)	0	1.22183	2	4.99984	1.25528	2	3.52015	1.27445	2	7.49755	0.84376	2	2.38185	1.0821	2	0.728483	0.919406	2	23.2676	0.90921	2	0.765393	32.41	0.00327246	2	1677.89	-9.00045	10.6118	1
	High	lVEDEERR	2	1	1	P38650	N-Term(iTRAQ8plex)	0	1.55459	2	6.10278	1.32092	2	6.22479	1.58696	2	4.81844	0.886372	2	21.4765	0.953955	2	7.37582	0.951125	2	9.12449	1.13141	2	8.68532	32.31	0.00261433	3	1349.72	-6.54299	15.7427	1
	High	eGEEVMFk	1	1	1	P38650	N-Term(iTRAQ8plex); K8(iTRAQ8plex)	0	1.63273	1		2.32857	1		2.07066	1		0.916726	1		1.34728	1		0.991932	1		1.04192	1		30.55	0.00440524	3	1576.86	7.96756	13.8053	0
	High	vEDVLGk	2	1	1	P38650	N-Term(iTRAQ8plex); K7(iTRAQ8plex)	0	1.40399	2	6.00554	1.2937	2	9.83121	1.35551	2	7.00961	0.893343	2	5.98858	0.989032	2	7.634	0.913722	2	9.20167	1.06456	2	9.35072	29.51	0.00727635	2	1367.83	-3.99	18.7904	0
	High	aNEVEQMIR	1	1	1	P38650	N-Term(iTRAQ8plex)	0	1.37744	1		1.36021	1		1.39239	1		1.07475	1		1.14177	1		0.956242	1		1.01944	1		28.56	0.00494571	2	1393.74	-0.879316	9.89185	0
	High	lLTLPnGER	1	1	1	P38650	N-Term(iTRAQ8plex); N6(Deamidated)	0	1.34346	1		1.36921	1		1.53033	1		0.629001	1		1.03947	1		1.05833	1		1.25297	1		28.52	0.00780356	2	1317.76	-3.33891	19.3378	0
	High	tSFLDDAFR	3	1	1	P38650	N-Term(iTRAQ8plex)	0	1.45063	3	7.66671	1.23628	3	0.836638	1.49971	3	1.5162	0.826029	3	6.18008	0.929097	3	7.75431	0.884809	3	11.675	1.00364	3	1.90412	27.2	0.00342983	2	1375.72	1.79549	21.2616	0
	High	dIQMPDGIR	1	1	1	P38650	N-Term(iTRAQ8plex)	0	1.5075	1		1.61169	1		1.51484	1		0.882442	1		1.12289	1		0.987713	1		1.13518	1		26.99	0.00659954	2	1348.72	0.0688514	18.8198	0
	High	vDNEFDQR	3	1	1	P38650	N-Term(iTRAQ8plex)	0	1.53775	3	6.98682	1.2993	3	11.6255	1.53143	3	0.720018	0.926841	3	2.59165	0.949665	3	3.45782	0.909194	3	0.565137	1.04544	3	2.38053	26.12	0.00354297	2	1326.65	-7.68698	16.9836	0
	High	lVEDEER	1	1	1	P38650	N-Term(iTRAQ8plex)	0	1.3597	1		1.37732	1		1.54153	1		0.894824	1		0.826868	1		1.01078	1		0.988837	1		25.83	0.00626919	2	1193.62	-7.80927	16.0452	0
	High	aELGEYIR	1	1	1	P38650	N-Term(iTRAQ8plex)	0	1.62574	1		1.49242	1		1.54657	1		0.786176	1		0.952	1		0.919524	1		1.00377	1		24.33	0.00922444	2	1254.7	-0.63221	14.2553	0
	High	aLGEYLER	1	1	1	P38650	N-Term(iTRAQ8plex)	0	1.44405	1		1.2145	1		1.22605	1		0.865465	1		0.934304	1		0.84311	1		1.02288	1		23.78	0.00879466	2	1254.7	-2.48073	10.6093	0
Q62871	Cytoplasmic dynein 1 intermediate chain 2 OS=Rattus norvegicus GN=Dync1i2 PE=1 SV=1 - [DC1I2_RAT]	436.303	11.76	1	7	7	16	1.49168	15	7.55681	1.46366	15	11.3693	1.45652	15	11.0151	0.969913	15	7.15372	0.934892	15	9.5546	0.844714	15	9.98146	1.04072	15	10.4612	638	71.134	5.23682
	A2	Sequence	# PSMs	# Proteins	# Protein Groups	Protein Group Accessions	Modifications	ΔCn	(115+116)/(113+114)	(115+116)/(113+114) Count	(115+116)/(113+114) Variability [%]	(117+118)/(113+114)	(117+118)/(113+114) Count	(117+118)/(113+114) Variability [%]	(119+121)/(113+114)	(119+121)/(113+114) Count	(119+121)/(113+114) Variability [%]	114/113	114/113 Count	114/113 Variability [%]	115/116	115/116 Count	115/116 Variability [%]	117/118	117/118 Count	117/118 Variability [%]	119/121	119/121 Count	119/121 Variability [%]	IonScore	Exp Value	Charge	MH+ [Da]	ΔM [ppm]	RT [min]	# Missed Cleavages
	High	sVSTPSEAGSQDSGDGAVGSR	2	1	1	Q62871	N-Term(iTRAQ8plex)	0	1.56957	1		1.29889	1		1.34994	1		0.816175	1		0.820857	1		0.876698	1		1.08398	1		91.57	1.14943e-09	2	2255.06	-2.74917	18.3216	0
	High	aLSEQINIFFDYSGR	2	1	1	Q62871	N-Term(iTRAQ8plex)	0	1.43207	2	28.7955	1.52411	2	24.9945	1.60369	2	14.3445	1.0485	2	8.18091	0.906863	2	1.31985	0.835858	2	16.4796	0.951927	2	13.2794	71.43	4.06489e-07	2	2064.05	-8.29971	20.4763	0
	High	eAAVSVQEESDLEk	1	1	1	Q62871	N-Term(iTRAQ8plex); K14(iTRAQ8plex)	0	1.46859	1		1.46366	1		1.13372	1		0.852969	1		1.44257	1		0.651931	1		1.23679	1		68.29	8.74686e-07	3	2142.12	-8.3322	14.2461	0
	High	aDAEEEAATRIPA	1	1	1	Q62871	N-Term(iTRAQ8plex)	0	1.87889	1		1.84648	1		1.64938	1		0.803669	1		1.03225	1		0.756737	1		0.843641	1		36.54	0.00056564	2	1647.84	-7.71795	14.1741	1
	High	aDAEEEAATR	6	1	1	Q62871	N-Term(iTRAQ8plex)	0	1.45429	6	8.36908	1.45409	6	11.0735	1.44255	6	8.82697	0.96958	6	4.09315	0.886314	6	7.1683	0.844341	6	6.60104	1.02986	6	6.2335	36.5	0.000369389	2	1366.67	-2.59963	18.0825	0
	High	qFFDER	2	1	1	Q62871	N-Term(iTRAQ8plex)	0	1.50973	2	1.7838	1.49254	2	2.08175	1.56867	2	0.940189	0.956037	2	4.94544	0.966043	2	4.67589	0.87356	2	4.98145	0.951465	2	2.86129	27.11	0.00398799	2	1145.6	7.34337	12.0179	0
	High	nDEWAR	2	1	1	Q62871	N-Term(iTRAQ8plex)	0	1.46989	2	6.75434	1.36322	2	7.57999	1.2644	2	16.7896	1.09014	2	10.2062	1.04963	2	5.50996	0.933797	2	14.134	1.11261	2	9.43408	21.29	0.00741259	2	1094.54	-9.23023	10.8145	0
Q68FS4	Cytosol aminopeptidase OS=Rattus norvegicus GN=Lap3 PE=1 SV=1 - [AMPL_RAT]	140.726	4.43	1	2	2	5	1.24398	5	7.67783	1.26161	5	8.58775	1.0925	5	5.03995	0.956092	5	0.527272	1.08681	5	1.58144	1.16741	5	5.67214	0.977655	5	6.11796	519	56.1147	7.21045
	A2	Sequence	# PSMs	# Proteins	# Protein Groups	Protein Group Accessions	Modifications	ΔCn	(115+116)/(113+114)	(115+116)/(113+114) Count	(115+116)/(113+114) Variability [%]	(117+118)/(113+114)	(117+118)/(113+114) Count	(117+118)/(113+114) Variability [%]	(119+121)/(113+114)	(119+121)/(113+114) Count	(119+121)/(113+114) Variability [%]	114/113	114/113 Count	114/113 Variability [%]	115/116	115/116 Count	115/116 Variability [%]	117/118	117/118 Count	117/118 Variability [%]	119/121	119/121 Count	119/121 Variability [%]	IonScore	Exp Value	Charge	MH+ [Da]	ΔM [ppm]	RT [min]	# Missed Cleavages
	High	tIQVDNTDAEGR	2	1	1	Q68FS4	N-Term(iTRAQ8plex)	0	1.16817	2	1.65679	1.30765	2	5.31809	1.06955	2	8.19797	0.955205	2	0.664835	0.986538	2	16.0341	1.24738	2	9.84676	0.932372	2	7.03992	58.41	4.75898e-06	2	1622.82	-4.05476	16.6113	0
	High	lFEASVETGDR	3	1	1	Q68FS4	N-Term(iTRAQ8plex)	0	1.28009	3	4.2443	1.21001	3	2.38097	1.0925	3	2.72546	0.956092	3	0.360286	1.08681	3	0.996437	1.12363	3	7.05418	1.0188	3	3.71457	31.07	0.00257937	2	1527.8	1.29187	20.1583	0
Q64559	Cytosolic acyl coenzyme A thioester hydrolase OS=Rattus norvegicus GN=Acot7 PE=1 SV=4 - [BACH_RAT]	107.3	3.15	1	1	1	3	1.37024	3	3.55777	1.97857	3	6.63857	1.38981	3	2.65332	1.05364	3	11.6925	1.13874	3	9.51968	1.16562	3	0.501996	1.01426	3	4.57702	381	42.7079	8.54346
	A2	Sequence	# PSMs	# Proteins	# Protein Groups	Protein Group Accessions	Modifications	ΔCn	(115+116)/(113+114)	(115+116)/(113+114) Count	(115+116)/(113+114) Variability [%]	(117+118)/(113+114)	(117+118)/(113+114) Count	(117+118)/(113+114) Variability [%]	(119+121)/(113+114)	(119+121)/(113+114) Count	(119+121)/(113+114) Variability [%]	114/113	114/113 Count	114/113 Variability [%]	115/116	115/116 Count	115/116 Variability [%]	117/118	117/118 Count	117/118 Variability [%]	119/121	119/121 Count	119/121 Variability [%]	IonScore	Exp Value	Charge	MH+ [Da]	ΔM [ppm]	RT [min]	# Missed Cleavages
	High	lMDEVAGIVAAR	3	1	1	Q64559	N-Term(iTRAQ8plex)	0	1.37024	3	3.55777	1.97857	3	6.63857	1.38981	3	2.65332	1.05364	3	11.6925	1.13874	3	9.51968	1.16562	3	0.501996	1.01426	3	4.57702	57.91	8.73763e-06	2	1548.86	-7.29172	15.1161	0
Q5I0L4	Cytosolic Fe-S cluster assembly factor NUBP1 OS=Rattus norvegicus GN=Nubp1 PE=2 SV=1 - [NUBP1_RAT]	39.99	3.13	1	1	1	1	0.673989	1		0.632959	1		0.547293	1		1.97956	1		0.977023	1		1.45611	1		0.853735	1		320	34.0231	6.07471
	A2	Sequence	# PSMs	# Proteins	# Protein Groups	Protein Group Accessions	Modifications	ΔCn	(115+116)/(113+114)	(115+116)/(113+114) Count	(115+116)/(113+114) Variability [%]	(117+118)/(113+114)	(117+118)/(113+114) Count	(117+118)/(113+114) Variability [%]	(119+121)/(113+114)	(119+121)/(113+114) Count	(119+121)/(113+114) Variability [%]	114/113	114/113 Count	114/113 Variability [%]	115/116	115/116 Count	115/116 Variability [%]	117/118	117/118 Count	117/118 Variability [%]	119/121	119/121 Count	119/121 Variability [%]	IonScore	Exp Value	Charge	MH+ [Da]	ΔM [ppm]	RT [min]	# Missed Cleavages
	High	qSHDENLISP	1	1	1	Q5I0L4	N-Term(iTRAQ8plex)	0	0.673989	1		0.632959	1		0.547293	1		1.97956	1		0.977023	1		1.45611	1		0.853735	1		39.99	0.000175403	2	1443.73	-7.47979	13.6293	0
Q6Q0N1	Cytosolic non-specific dipeptidase OS=Rattus norvegicus GN=Cndp2 PE=1 SV=1 - [CNDP2_RAT]	159.552	9.68	1	4	4	9	1.0824	7	5.88667	1.14705	7	3.24067	1.21336	7	5.64679	0.949288	7	8.86746	1.08898	6	13.505	1.10175	7	11.554	0.973557	7	4.76383	475	52.6596	5.65576
	A2	Sequence	# PSMs	# Proteins	# Protein Groups	Protein Group Accessions	Modifications	ΔCn	(115+116)/(113+114)	(115+116)/(113+114) Count	(115+116)/(113+114) Variability [%]	(117+118)/(113+114)	(117+118)/(113+114) Count	(117+118)/(113+114) Variability [%]	(119+121)/(113+114)	(119+121)/(113+114) Count	(119+121)/(113+114) Variability [%]	114/113	114/113 Count	114/113 Variability [%]	115/116	115/116 Count	115/116 Variability [%]	117/118	117/118 Count	117/118 Variability [%]	119/121	119/121 Count	119/121 Variability [%]	IonScore	Exp Value	Charge	MH+ [Da]	ΔM [ppm]	RT [min]	# Missed Cleavages
	High	aVFQYIDENQDR	2	1	1	Q6Q0N1	N-Term(iTRAQ8plex)	0	1.07339	2	7.13104	1.15965	2	1.62001	1.2309	2	6.57319	0.890959	2	8.54585	1.02787	2	21.3643	1.13625	2	24.697	0.992115	2	1.9617	50.22	2.09133e-05	2	1801.9	-2.09568	7.7577	0
	High	lGGSVELVDIGk	1	1	1	Q6Q0N1	N-Term(iTRAQ8plex); K12(iTRAQ8plex)	0	1.0824	1		1.29344	1		1.34803	1		0.926084	1		1.19541	1		0.901361	1		0.973557	1		40.49	0.000674446	2	1795.07	-4.30229	6.32923	0
	High	tVFGVEPDLTR	2	1	1	Q6Q0N1	N-Term(iTRAQ8plex)	0	1.04393	2	5.83075	1.2328	2	11.1847	1.26681	2	8.88141	1.03988	2	13.5756	1.08062	2	14.2797	1.15773	2	1.8096	0.946528	2	1.40701	35.72	0.00113865	2	1537.85	-0.774588	15.9409	0
	High	mTEAAAADVQR	1	1	1	Q6Q0N1	N-Term(iTRAQ8plex)	0	0.404883	1		0.761135	1		1.21336	1		1.18087	1					1.10175	1		1.32656	1		34.7	0.000880995	3	1466.74	-9.2935	17.0006	0
	High	aVFqYIDENQDR	3	1	1	Q6Q0N1	N-Term(iTRAQ8plex); Q4(Deamidated)	0	1.0906	1		1.13377	1		1.16805	1		1.00768	1		1.00051	1		1.01941	1		0.820738	1		25.14	0.00765491	2	1802.9	9.34408	11.3129	0
O08651	D-3-phosphoglycerate dehydrogenase OS=Rattus norvegicus GN=Phgdh PE=1 SV=3 - [SERA_RAT]	167.838	4.88	1	2	2	5	0.943224	5	12.1268	1.00841	5	4.75054	1.21531	5	2.46366	0.932781	5	22.7294	0.969211	5	9.04912	1.14089	5	3.78646	0.921649	5	6.18109	533	56.4572	6.7124
	A2	Sequence	# PSMs	# Proteins	# Protein Groups	Protein Group Accessions	Modifications	ΔCn	(115+116)/(113+114)	(115+116)/(113+114) Count	(115+116)/(113+114) Variability [%]	(117+118)/(113+114)	(117+118)/(113+114) Count	(117+118)/(113+114) Variability [%]	(119+121)/(113+114)	(119+121)/(113+114) Count	(119+121)/(113+114) Variability [%]	114/113	114/113 Count	114/113 Variability [%]	115/116	115/116 Count	115/116 Variability [%]	117/118	117/118 Count	117/118 Variability [%]	119/121	119/121 Count	119/121 Variability [%]	IonScore	Exp Value	Charge	MH+ [Da]	ΔM [ppm]	RT [min]	# Missed Cleavages
	High	aGTGVDNVDLEAATR	2	1	1	O08651	N-Term(iTRAQ8plex)	0	0.901798	2	8.71137	1.08716	2	15.9976	1.27417	2	7.33948	0.850075	2	13.8308	1.06996	2	14.7408	1.12392	2	4.23725	0.887017	2	3.08575	64.28	1.51166e-06	2	1792.92	-6.09834	14.6356	0
	High	gGIVDEGALLR	3	1	1	O08651	N-Term(iTRAQ8plex)	0	0.943224	3	12.1268	1.00841	3	3.47832	1.21531	3	2.46366	1.0108	3	10.5632	0.963857	3	9.87596	1.14089	3	3.78646	0.960847	3	1.52882	51.38	4.98529e-05	2	1403.82	0.0401319	18.9989	0
Q5PPL2	DCN1-like protein 5 OS=Rattus norvegicus GN=Dcun1d5 PE=2 SV=1 - [DCNL5_RAT]	28.75	4.22	1	1	1	1	1.01861	1		0.721912	1		0.922574	1		1.09211	1		0.965247	1		1.32377	1		0.815331	1		237	27.5507	5.43994
	A2	Sequence	# PSMs	# Proteins	# Protein Groups	Protein Group Accessions	Modifications	ΔCn	(115+116)/(113+114)	(115+116)/(113+114) Count	(115+116)/(113+114) Variability [%]	(117+118)/(113+114)	(117+118)/(113+114) Count	(117+118)/(113+114) Variability [%]	(119+121)/(113+114)	(119+121)/(113+114) Count	(119+121)/(113+114) Variability [%]	114/113	114/113 Count	114/113 Variability [%]	115/116	115/116 Count	115/116 Variability [%]	117/118	117/118 Count	117/118 Variability [%]	119/121	119/121 Count	119/121 Variability [%]	IonScore	Exp Value	Charge	MH+ [Da]	ΔM [ppm]	RT [min]	# Missed Cleavages
	High	lISGEEDFSR	1	1	1	Q5PPL2	N-Term(iTRAQ8plex)	0	1.01861	1		0.721912	1		0.922574	1		1.09211	1		0.965247	1		1.32377	1		0.815331	1		28.75	0.00426727	2	1456.76	0.775594	18.8125	0
P80254	D-dopachrome decarboxylase OS=Rattus norvegicus GN=Ddt PE=1 SV=3 - [DOPD_RAT]	54.2857	10.17	1	1	1	2	0.58861	2	45.8184	0.736322	2	40.4614	0.399596	2	7.68771	0.835737	2	12.0813	1.07884	1		1.75211	2	11.1733	0.976394	1		118	13.1248	6.53662
	A2	Sequence	# PSMs	# Proteins	# Protein Groups	Protein Group Accessions	Modifications	ΔCn	(115+116)/(113+114)	(115+116)/(113+114) Count	(115+116)/(113+114) Variability [%]	(117+118)/(113+114)	(117+118)/(113+114) Count	(117+118)/(113+114) Variability [%]	(119+121)/(113+114)	(119+121)/(113+114) Count	(119+121)/(113+114) Variability [%]	114/113	114/113 Count	114/113 Variability [%]	115/116	115/116 Count	115/116 Variability [%]	117/118	117/118 Count	117/118 Variability [%]	119/121	119/121 Count	119/121 Variability [%]	IonScore	Exp Value	Charge	MH+ [Da]	ΔM [ppm]	RT [min]	# Missed Cleavages
	High	fLTEELSLDQDR	1	1	1	P80254	N-Term(iTRAQ8plex)	0	0.790135	1		0.56625	1		0.420831	1		0.906424	1		1.07884	1		1.88882	1		0.976394	1		39.94	0.000390356	2	1769.92	1.28076	22.5351	0
	High	fLTEELSLDqDR	1	1	1	P80254	N-Term(iTRAQ8plex); Q10(Deamidated)	0	0.438484	1		0.957474	1		0.379433	1		0.770564	1					1.6253	1					31.7	0.00199444	3	1770.9	-4.45291	22.4561	0
Q62651	Delta(3,5)-Delta(2,4)-dienoyl-CoA isomerase, mitochondrial OS=Rattus norvegicus GN=Ech1 PE=1 SV=2 - [ECH1_RAT]	28.08	2.45	1	1	1	1	0.967121	1		1.06134	1		1.03347	1		0.893811	1		1.00607	1		1.12475	1		1.02578	1		327	36.1484	7.98682
	A2	Sequence	# PSMs	# Proteins	# Protein Groups	Protein Group Accessions	Modifications	ΔCn	(115+116)/(113+114)	(115+116)/(113+114) Count	(115+116)/(113+114) Variability [%]	(117+118)/(113+114)	(117+118)/(113+114) Count	(117+118)/(113+114) Variability [%]	(119+121)/(113+114)	(119+121)/(113+114) Count	(119+121)/(113+114) Variability [%]	114/113	114/113 Count	114/113 Variability [%]	115/116	115/116 Count	115/116 Variability [%]	117/118	117/118 Count	117/118 Variability [%]	119/121	119/121 Count	119/121 Variability [%]	IonScore	Exp Value	Charge	MH+ [Da]	ΔM [ppm]	RT [min]	# Missed Cleavages
	High	eLVEcFQk	1	1	1	Q62651	N-Term(iTRAQ8plex); C5(Carbamidomethyl); K8(iTRAQ8plex)	0	0.967121	1		1.06134	1		1.03347	1		0.893811	1		1.00607	1		1.12475	1		1.02578	1		28.08	0.00964699	2	1660.92	-2.28106	9.96929	0
Q5PPJ4	Deoxyhypusine hydroxylase OS=Rattus norvegicus GN=Dohh PE=2 SV=1 - [DOHH_RAT]	25.6	2.65	1	1	1	1	1.1286	1		0.878651	1		0.794317	1		1.10181	1		0.951841	1		1.2225	1		0.89519	1		302	33.0558	5.04639
	A2	Sequence	# PSMs	# Proteins	# Protein Groups	Protein Group Accessions	Modifications	ΔCn	(115+116)/(113+114)	(115+116)/(113+114) Count	(115+116)/(113+114) Variability [%]	(117+118)/(113+114)	(117+118)/(113+114) Count	(117+118)/(113+114) Variability [%]	(119+121)/(113+114)	(119+121)/(113+114) Count	(119+121)/(113+114) Variability [%]	114/113	114/113 Count	114/113 Variability [%]	115/116	115/116 Count	115/116 Variability [%]	117/118	117/118 Count	117/118 Variability [%]	119/121	119/121 Count	119/121 Variability [%]	IonScore	Exp Value	Charge	MH+ [Da]	ΔM [ppm]	RT [min]	# Missed Cleavages
	High	eYITDPER	1	1	1	Q5PPJ4	N-Term(iTRAQ8plex)	0	1.1286	1		0.878651	1		0.794317	1		1.10181	1		0.951841	1		1.2225	1		0.89519	1		25.6	0.0048199	2	1326.67	-7.77396	15.3147	0
Q4QR86	DEP domain-containing protein 7 OS=Rattus norvegicus GN=Depdc7 PE=2 SV=1 - [DEPD7_RAT]	28.83	1.37	1	1	1	1	1.21301	1		1.09629	1		1.15237	1		0.904081	1		1.11936	1		1.02366	1		0.902387	1		511	58.1652	7.81104
	A2	Sequence	# PSMs	# Proteins	# Protein Groups	Protein Group Accessions	Modifications	ΔCn	(115+116)/(113+114)	(115+116)/(113+114) Count	(115+116)/(113+114) Variability [%]	(117+118)/(113+114)	(117+118)/(113+114) Count	(117+118)/(113+114) Variability [%]	(119+121)/(113+114)	(119+121)/(113+114) Count	(119+121)/(113+114) Variability [%]	114/113	114/113 Count	114/113 Variability [%]	115/116	115/116 Count	115/116 Variability [%]	117/118	117/118 Count	117/118 Variability [%]	119/121	119/121 Count	119/121 Variability [%]	IonScore	Exp Value	Charge	MH+ [Da]	ΔM [ppm]	RT [min]	# Missed Cleavages
	High	lLDSQnR	1	1	1	Q4QR86	N-Term(iTRAQ8plex); N6(Deamidated)	0	1.21301	1		1.09629	1		1.15237	1		0.904081	1		1.11936	1		1.02366	1		0.902387	1		28.83	0.00556402	2	1150.63	-9.19232	13.4135	0
Q7M0E3	Destrin OS=Rattus norvegicus GN=Dstn PE=1 SV=3 - [DEST_RAT]	362.595	16.36	1	2	2	15	1.17477	15	7.99047	1.30068	15	20.4478	1.10707	15	14.0776	0.938229	14	11.8725	0.985161	14	17.2393	1.08268	12	6.22522	0.920904	14	10.5023	165	18.5215	8.03076
	A2	Sequence	# PSMs	# Proteins	# Protein Groups	Protein Group Accessions	Modifications	ΔCn	(115+116)/(113+114)	(115+116)/(113+114) Count	(115+116)/(113+114) Variability [%]	(117+118)/(113+114)	(117+118)/(113+114) Count	(117+118)/(113+114) Variability [%]	(119+121)/(113+114)	(119+121)/(113+114) Count	(119+121)/(113+114) Variability [%]	114/113	114/113 Count	114/113 Variability [%]	115/116	115/116 Count	115/116 Variability [%]	117/118	117/118 Count	117/118 Variability [%]	119/121	119/121 Count	119/121 Variability [%]	IonScore	Exp Value	Charge	MH+ [Da]	ΔM [ppm]	RT [min]	# Missed Cleavages
	High	yALYDASFETk	14	1	1	Q7M0E3	N-Term(iTRAQ8plex); K11(iTRAQ8plex)	0	1.17117	14	8.9944	1.32378	14	15.8756	1.10276	14	16.3336	0.92236	13	15.041	0.989591	13	16.3279	1.08156	11	3.28734	0.916065	13	10.6406	58.56	6.61749e-06	3	1916.02	-3.41064	12.8881	0
	High	eILVGDVGVTITDPFk	1	1	1	Q7M0E3	N-Term(iTRAQ8plex); K16(iTRAQ8plex)	0	1.17477	1		1.00821	1		1.21677	1		1.01208	1		0.792755	1		1.16574	1		0.940189	1		33.31	0.00412994	3	2311.33	-2.05197	16.8355	0
P08461	Dihydrolipoyllysine-residue acetyltransferase component of pyruvate dehydrogenase complex, mitochondrial OS=Rattus norvegicus GN=Dlat PE=1 SV=3 - [ODP2_RAT]	47.03	1.42	1	1	1	1	0.954846	1		1.4231	1		1.15948	1		0.849037	1		0.944197	1		1.33571	1		0.968171	1		632	67.1234	8.52881
	A2	Sequence	# PSMs	# Proteins	# Protein Groups	Protein Group Accessions	Modifications	ΔCn	(115+116)/(113+114)	(115+116)/(113+114) Count	(115+116)/(113+114) Variability [%]	(117+118)/(113+114)	(117+118)/(113+114) Count	(117+118)/(113+114) Variability [%]	(119+121)/(113+114)	(119+121)/(113+114) Count	(119+121)/(113+114) Variability [%]	114/113	114/113 Count	114/113 Variability [%]	115/116	115/116 Count	115/116 Variability [%]	117/118	117/118 Count	117/118 Variability [%]	119/121	119/121 Count	119/121 Variability [%]	IonScore	Exp Value	Charge	MH+ [Da]	ΔM [ppm]	RT [min]	# Missed Cleavages
	High	dIDSFVPTk	1	1	1	P08461	N-Term(iTRAQ8plex); K9(iTRAQ8plex)	0	0.954846	1		1.4231	1		1.15948	1		0.849037	1		0.944197	1		1.33571	1		0.968171	1		47.03	0.000132762	2	1629.94	3.07823	14.1612	0
Q01205	Dihydrolipoyllysine-residue succinyltransferase component of 2-oxoglutarate dehydrogenase complex, mitochondrial OS=Rattus norvegicus GN=Dlst PE=1 SV=2 - [ODO2_RAT]	169.676	5.51	1	3	3	7	0.985284	7	15.222	1.21323	7	11.6479	1.18149	7	13.8382	0.963962	7	10.0694	1.12111	7	12.4133	1.24546	7	3.95155	0.964903	7	13.5925	454	48.8944	8.68994
	A2	Sequence	# PSMs	# Proteins	# Protein Groups	Protein Group Accessions	Modifications	ΔCn	(115+116)/(113+114)	(115+116)/(113+114) Count	(115+116)/(113+114) Variability [%]	(117+118)/(113+114)	(117+118)/(113+114) Count	(117+118)/(113+114) Variability [%]	(119+121)/(113+114)	(119+121)/(113+114) Count	(119+121)/(113+114) Variability [%]	114/113	114/113 Count	114/113 Variability [%]	115/116	115/116 Count	115/116 Variability [%]	117/118	117/118 Count	117/118 Variability [%]	119/121	119/121 Count	119/121 Variability [%]	IonScore	Exp Value	Charge	MH+ [Da]	ΔM [ppm]	RT [min]	# Missed Cleavages
	High	vLLLDL	2	1	1	Q01205	N-Term(iTRAQ8plex)	0	1.0178	2	20.149	1.08245	2	3.49288	1.12459	2	19.5001	1.01607	2	16.2974	1.07122	2	15.3221	1.25347	2	1.71566	0.937056	2	18.0158	48.21	5.81381e-05	2	989.648	-7.23455	13.9778	0
	High	aAVEDPR	3	1	1	Q01205	N-Term(iTRAQ8plex)	0	0.950348	3	5.02194	1.21323	3	4.0774	1.0842	3	1.03119	0.90082	3	1.89198	1.21862	3	3.657	1.28323	3	3.28859	0.940894	3	3.7371	40.01	9.95337e-05	2	1061.59	-1.62896	13.3908	0
	High	nVETMNYADIER	2	1	1	Q01205	N-Term(iTRAQ8plex)	0	1.10202	2	1.31771	1.31458	2	0.286115	1.37646	2	1.6069	1.05163	2	12.9592	1.02072	2	4.80893	1.17112	2	5.17818	1.03408	2	4.12931	37.83	0.0004038	2	1758.88	8.88897	16.1026	0
P47942	Dihydropyrimidinase-related protein 2 OS=Rattus norvegicus GN=Dpysl2 PE=1 SV=1 - [DPYL2_RAT]	1129.56	21.33	1	7	8	26	1.12096	15	8.56385	1.38565	16	18.3318	1.30265	16	21.8707	0.945329	11	20.4576	1.00213	14	14.6691	1.08273	13	12.0599	0.985419	15	24.9382	572	62.2386	6.37939
	A2	Sequence	# PSMs	# Proteins	# Protein Groups	Protein Group Accessions	Modifications	ΔCn	(115+116)/(113+114)	(115+116)/(113+114) Count	(115+116)/(113+114) Variability [%]	(117+118)/(113+114)	(117+118)/(113+114) Count	(117+118)/(113+114) Variability [%]	(119+121)/(113+114)	(119+121)/(113+114) Count	(119+121)/(113+114) Variability [%]	114/113	114/113 Count	114/113 Variability [%]	115/116	115/116 Count	115/116 Variability [%]	117/118	117/118 Count	117/118 Variability [%]	119/121	119/121 Count	119/121 Variability [%]	IonScore	Exp Value	Charge	MH+ [Da]	ΔM [ppm]	RT [min]	# Missed Cleavages
	High	fQLTDSQIYEVLSVIR	7	1	1	P47942	N-Term(iTRAQ8plex)	0	1.11743	3	0.562974	1.25827	3	1.03763	1.28767	3	2.66035	1.04649	3	6.49866	0.912867	3	1.60538	1.08273	3	12.0271	0.944632	3	7.04085	108.13	1.4997e-10	3	2215.23	-0.467062	11.585	0
	High	dIGAIAQVHAENGDIIAEEQQR	6	1	1	P47942	N-Term(iTRAQ8plex)	0	1.12096	5	14.7334	1.56741	5	19.6538	1.59244	5	28.9141	1.03584	4	29.1048	1.01038	4	17.8907	1.13415	5	34.4969	1.00455	5	4.04744	104.41	3.1334e-10	2	2681.38	-0.377266	14.5569	0
	High	fQMPDQGMTSADDFFQGTk	2	1	1	P47942	N-Term(iTRAQ8plex); K19(iTRAQ8plex)	0	2.09675	1		1.3737	2	36.6118	1.91259	2	69.3518				1.42664	1					1.49106	1		89.97	2.81941e-09	3	2759.32	-2.35521	25.4923	0
	High	gLYDGPVcEVSVTPk	2	1	1	P47942	N-Term(iTRAQ8plex); C8(Carbamidomethyl); K15(iTRAQ8plex)	0	1.04334	2	8.23539	1.24251	2	32.4055	1.0685	2	7.63908	0.853949	2	5.17943	1.14264	2	21.9552	1.11137	2	15.6222	0.970005	2	31.3219	63.06	4.42408e-06	2	2229.2	-3.58627	15.8495	0
	High	mDENQFVAVTSTNAAk	2	2	2	Q62952;P47942	N-Term(iTRAQ8plex); K16(iTRAQ8plex)	0																						54.84	2.62476e-05	3	2334.22	-1.07733	16.4157	0
	High	dIGAIAQVHAEnGDIIAEEQQR	4	1	1	P47942	N-Term(iTRAQ8plex); N12(Deamidated)	0	1.79125	1		0.500903	1		1.86042	1					0.699554	1					0.750025	1		52.21	4.23827e-05	3	2682.36	-1.5453	21.8715	0
	High	qIGENLIVPGGVk	1	1	1	P47942	N-Term(iTRAQ8plex); K13(iTRAQ8plex)	0	1.05892	1		1.42387	1		1.19613	1		0.945329	1		1.10106	1		1.21845	1		0.947672	1		31.61	0.00331315	2	1932.17	-1.64033	9.58652	0
	High	gIQEEMEALVk	1	1	1	P47942	N-Term(iTRAQ8plex); K11(iTRAQ8plex)	0	2.07843	1		2.96906	1		2.60059	1					1.0174	1		1.03725	1		1.16684	1		31.44	0.00588591	3	1855.06	8.45854	17.4473	0
	High	sAAEVIAQAR	1	1	1	P47942	N-Term(iTRAQ8plex)	0	1.17969	1		1.25743	1		1.24962	1		1.04117	1		1.11049	1		0.99844	1		0.985419	1		27.2	0.0107659	2	1319.75	-9.92038	8.38066	0
Q62952	Dihydropyrimidinase-related protein 3 OS=Rattus norvegicus GN=Dpysl3 PE=1 SV=2 - [DPYL3_RAT]	1114.22	28.6	1	11	12	51	1.42019	47	16.8191	1.74799	47	32.075	1.36649	46	18.0316	0.976731	40	12.695	1.08787	47	12.1564	1.08867	47	10.1675	0.921235	44	6.67532	570	61.928	6.49365
	A2	Sequence	# PSMs	# Proteins	# Protein Groups	Protein Group Accessions	Modifications	ΔCn	(115+116)/(113+114)	(115+116)/(113+114) Count	(115+116)/(113+114) Variability [%]	(117+118)/(113+114)	(117+118)/(113+114) Count	(117+118)/(113+114) Variability [%]	(119+121)/(113+114)	(119+121)/(113+114) Count	(119+121)/(113+114) Variability [%]	114/113	114/113 Count	114/113 Variability [%]	115/116	115/116 Count	115/116 Variability [%]	117/118	117/118 Count	117/118 Variability [%]	119/121	119/121 Count	119/121 Variability [%]	IonScore	Exp Value	Charge	MH+ [Da]	ΔM [ppm]	RT [min]	# Missed Cleavages
	High	aITVASQTNcPLYVTk	1	1	1	Q62952	N-Term(iTRAQ8plex); C10(Carbamidomethyl); K16(iTRAQ8plex)	0	1.91307	1		3.40199	1		1.8799	1		0.828824	1		0.981306	1		1.15151	1		0.858546	1		81.28	6.85153e-08	2	2374.32	-2.81839	9.77241	0
	High	gMTTVDDFFQGTk	5	1	1	Q62952	N-Term(iTRAQ8plex); K13(iTRAQ8plex)	0	2.20613	4	2.63739	3.50694	4	18.0692	1.80334	3	4.97386	1.01129	3	45.5013	1.16201	4	1.36298	1.30117	3	14.1146	0.859546	3	7.7114	72.31	3.31931e-07	2	2055.06	-2.05694	13.4529	0
	High	gAPLVVIcQGk	3	1	1	Q62952	N-Term(iTRAQ8plex); C8(Carbamidomethyl); K11(iTRAQ8plex)	0	1.81359	3	0.84502	2.19956	3	2.77671	1.54623	3	0.486268	0.878551	3	3.2194	1.11478	3	7.5203	1.10265	3	0.181673	0.900342	3	1.41839	68.52	8.08477e-07	2	1750.05	-2.64522	9.7975	0
	High	dNFTAIPEGTNGVEER	5	1	1	Q62952	N-Term(iTRAQ8plex)	0	1.89532	5	114.769	2.8771	5	121.558	1.65503	5	76.1614	0.927627	2	36.253	0.902648	4	5.25209	1.51536	5	21.1723	0.953476	4	16.2523	68.31	3.83684e-07	2	2053	-6.93027	15.0101	0
	High	dNFTAIPEGTnGVEER	1	1	1	Q62952	N-Term(iTRAQ8plex); N11(Deamidated)	0	1.9723	1		2.19401	1		1.7157	1		1.15452	1		0.819242	1		1.03326	1		1.21268	1		64.03	1.04772e-06	2	2054.01	7.27345	19.367	0
	High	mDENQFVAVTSTNAAk	2	2	2	Q62952;P47942	N-Term(iTRAQ8plex); K16(iTRAQ8plex)	0																						54.84	2.62476e-05	3	2334.22	-1.07733	16.4157	0
	High	gMYDGPVFDLTTTPk	4	1	1	Q62952	N-Term(iTRAQ8plex); K15(iTRAQ8plex)	0	1.58953	3	27.0769	3.14441	3	65.5232	1.63807	3	59.5199	1.17643	3	15.2823	0.945967	4	4.9158	1.01445	4	15.3316	0.920078	3	3.24844	51.38	5.24001e-05	2	2250.18	-4.02784	13.6783	0
	High	aIGkDNFTAIPEGTnGVEER	1	1	1	Q62952	N-Term(iTRAQ8plex); K4(iTRAQ8plex); N15(Deamidated)	0	1.4434	1		2.49547	1		1.39239	1		1.06374	1		1.05522	1		1.6425	1		1.09452	1		47.39	0.000190597	3	2727.44	-1.06063	14.5383	1
	High	aALAGGTTMIIDHVVPEPESSLTEAYEk	1	1	1	Q62952	N-Term(iTRAQ8plex); K28(iTRAQ8plex)	0	2.81259	1		4.39384	1		2.36177	1					1.22672	1		1.12611	1		1.0954	1		46.4	0.000296667	3	3537.89	7.1829	13.5679	0
	High	mADLHAVPR	4	1	1	Q62952	N-Term(iTRAQ8plex)	0	1.50654	4	9.84515	2.42218	4	22.5163	1.49078	4	29.8671	1.53862	3	57.7458	1.28056	4	13.588	1.35045	4	21.4125	0.763173	4	22.4587	43.17	0.000219286	3	1313.74	7.58533	9.46572	0
	High	iAVGSDSDLVIWDPDAVk	1	1	1	Q62952	N-Term(iTRAQ8plex); K18(iTRAQ8plex)	0	2.81579	1		3.80307	1		1.61642	1					0.578591	1		0.856289	1					40.31	0.00101491	3	2508.4	7.44094	12.0406	0
	High	sAADLISQAR	19	1	1	Q62952	N-Term(iTRAQ8plex)	0	1.36752	19	4.55302	1.51934	19	5.7976	1.31297	19	3.8183	0.931463	19	8.03401	1.08469	19	5.32752	1.06199	19	5.61332	0.92803	19	3.83131	38.88	0.000614743	2	1335.77	8.81369	0.421698	0
	High	sNITSLS	4	1	1	Q62952	N-Term(iTRAQ8plex)	0	1.19282	4	12.3139	1.21392	4	11.5797	1.06901	4	27.5828	1.0551	4	3.61677	1.17063	4	31.4305	0.894577	4	5.36895	0.978085	4	18.7946	29.36	0.00237549	2	1025.57	-8.91802	10.7058	0
Q9JHU0	Dihydropyrimidinase-related protein 5 OS=Rattus norvegicus GN=Dpysl5 PE=1 SV=1 - [DPYL5_RAT]	49.76	2.48	1	1	1	1	1.37331	1		1.79392	1		1.4712	1		1.12812	1		1.11748	1		1.43621	1		1.13586	1		564	61.5012	7.07861
	A2	Sequence	# PSMs	# Proteins	# Protein Groups	Protein Group Accessions	Modifications	ΔCn	(115+116)/(113+114)	(115+116)/(113+114) Count	(115+116)/(113+114) Variability [%]	(117+118)/(113+114)	(117+118)/(113+114) Count	(117+118)/(113+114) Variability [%]	(119+121)/(113+114)	(119+121)/(113+114) Count	(119+121)/(113+114) Variability [%]	114/113	114/113 Count	114/113 Variability [%]	115/116	115/116 Count	115/116 Variability [%]	117/118	117/118 Count	117/118 Variability [%]	119/121	119/121 Count	119/121 Variability [%]	IonScore	Exp Value	Charge	MH+ [Da]	ΔM [ppm]	RT [min]	# Missed Cleavages
	High	vHAEnGELVAEGAk	1	1	1	Q9JHU0	N-Term(iTRAQ8plex); N5(Deamidated); K14(iTRAQ8plex)	0	1.37331	1		1.79392	1		1.4712	1		1.12812	1		1.11748	1		1.43621	1		1.13586	1		49.76	8.29602e-05	3	2033.09	-8.70477	11.0243	0
Q9EPB1	Dipeptidyl-peptidase 2 OS=Rattus norvegicus GN=Dpp7 PE=1 SV=1 - [DPP2_RAT]	136.456	2.8	1	1	1	2	0.795003	2	6.79758	0.831961	2	0.944363	1.11346	2	0.120477	1.0055	2	0.18031	0.95252	2	1.77763	1.03177	2	10.3199	0.937742	2	11.5525	500	55.079	5.04639
	A2	Sequence	# PSMs	# Proteins	# Protein Groups	Protein Group Accessions	Modifications	ΔCn	(115+116)/(113+114)	(115+116)/(113+114) Count	(115+116)/(113+114) Variability [%]	(117+118)/(113+114)	(117+118)/(113+114) Count	(117+118)/(113+114) Variability [%]	(119+121)/(113+114)	(119+121)/(113+114) Count	(119+121)/(113+114) Variability [%]	114/113	114/113 Count	114/113 Variability [%]	115/116	115/116 Count	115/116 Variability [%]	117/118	117/118 Count	117/118 Variability [%]	119/121	119/121 Count	119/121 Variability [%]	IonScore	Exp Value	Charge	MH+ [Da]	ΔM [ppm]	RT [min]	# Missed Cleavages
	High	aSNSEDPPSVVEVR	2	1	1	Q9EPB1	N-Term(iTRAQ8plex)	0	0.795003	2	6.79758	0.831961	2	0.944363	1.11346	2	0.120477	1.0055	2	0.18031	0.95252	2	1.77763	1.03177	2	10.3199	0.937742	2	11.5525	82.44	1.65348e-08	2	1789.91	-9.01563	13.5634	0
O55096	Dipeptidyl-peptidase 3 OS=Rattus norvegicus GN=Dpp3 PE=1 SV=2 - [DPP3_RAT]	120.775	9.21	1	4	4	4	1.36262	3	17.5318	1.6145	3	27.6466	1.47794	3	37.6204	0.89367	3	18.6242	1.02686	4	19.2135	0.992928	4	17.0408	0.900231	4	10.007	738	82.9869	5.22412
	A2	Sequence	# PSMs	# Proteins	# Protein Groups	Protein Group Accessions	Modifications	ΔCn	(115+116)/(113+114)	(115+116)/(113+114) Count	(115+116)/(113+114) Variability [%]	(117+118)/(113+114)	(117+118)/(113+114) Count	(117+118)/(113+114) Variability [%]	(119+121)/(113+114)	(119+121)/(113+114) Count	(119+121)/(113+114) Variability [%]	114/113	114/113 Count	114/113 Variability [%]	115/116	115/116 Count	115/116 Variability [%]	117/118	117/118 Count	117/118 Variability [%]	119/121	119/121 Count	119/121 Variability [%]	IonScore	Exp Value	Charge	MH+ [Da]	ΔM [ppm]	RT [min]	# Missed Cleavages
	High	aGLLALEFYTPETANWR	1	1	1	O55096	N-Term(iTRAQ8plex)	0	1.53229	1		1.93882	1		1.889	1		0.681765	1		0.714499	1		0.980007	1		0.9194	1		64.65	2.43365e-06	2	2256.18	-7.40281	13.3978	0
	High	lASVLNTEPALDSELTSk	1	1	1	O55096	N-Term(iTRAQ8plex); K18(iTRAQ8plex)	0	0.750304	1		0.875406	1		0.746796	1		0.89367	1		1.11473	1		1.23126	1		0.783965	1		51.5	5.80516e-05	3	2496.42	7.52881	10.4345	0
	High	vLLEAGEGLVTVTPTTGSDGRPDAR	1	1	1	O55096	N-Term(iTRAQ8plex)	0													1.22292	1		0.715461	1		1.00852	1		39.73	0.00113863	3	2815.52	2.27224	18.9857	0
	High	aQDPDQLR	1	1	1	O55096	N-Term(iTRAQ8plex)	0	1.36262	1		1.6145	1		1.47794	1		1.0122	1		0.945919	1		1.00602	1		0.881463	1		25.56	0.00542044	2	1246.67	-2.33572	15.713	0
Q566C7	Diphosphoinositol polyphosphate phosphohydrolase 1 OS=Rattus norvegicus GN=Nudt3 PE=1 SV=1 - [NUDT3_RAT]	75.4364	14.29	1	2	2	3	0.879293	3	18.0298	0.992944	3	42.6424	0.899077	3	24.4895	0.768091	3	23.1296	1.13797	3	10.9171	1.08503	3	2.90408	0.896518	3	5.53396	168	19.0836	6.34131
	A2	Sequence	# PSMs	# Proteins	# Protein Groups	Protein Group Accessions	Modifications	ΔCn	(115+116)/(113+114)	(115+116)/(113+114) Count	(115+116)/(113+114) Variability [%]	(117+118)/(113+114)	(117+118)/(113+114) Count	(117+118)/(113+114) Variability [%]	(119+121)/(113+114)	(119+121)/(113+114) Count	(119+121)/(113+114) Variability [%]	114/113	114/113 Count	114/113 Variability [%]	115/116	115/116 Count	115/116 Variability [%]	117/118	117/118 Count	117/118 Variability [%]	119/121	119/121 Count	119/121 Variability [%]	IonScore	Exp Value	Charge	MH+ [Da]	ΔM [ppm]	RT [min]	# Missed Cleavages
	High	sESEEEVLLVSSSR	1	1	1	Q566C7	N-Term(iTRAQ8plex)	0	0.779366	1		0.75369	1		0.656259	1		1.20787	1		0.972434	1		1.06399	1		0.834069	1		40.51	0.000382356	2	1854.96	0.47961	15.2809	0
	High	lVGIFENQER	2	1	1	Q566C7	N-Term(iTRAQ8plex)	0	0.993537	2	18.2599	1.14502	2	21.3653	0.975313	2	12.111	0.711175	2	11.4517	1.18052	2	5.44643	1.11766	2	4.39563	0.913394	2	2.76539	35.89	0.0011207	2	1508.85	7.17958	8.13301	0
Q99MY2	Diphosphoinositol polyphosphate phosphohydrolase 2 OS=Rattus norvegicus GN=Nudt4 PE=2 SV=1 - [NUDT4_RAT]	31.3	5.03	1	1	1	1	0.928536	1		0.912349	1		1.21106	1		0.779744	1		0.939011	1		0.905962	1		0.901455	1		179	20.1252	6.354
	A2	Sequence	# PSMs	# Proteins	# Protein Groups	Protein Group Accessions	Modifications	ΔCn	(115+116)/(113+114)	(115+116)/(113+114) Count	(115+116)/(113+114) Variability [%]	(117+118)/(113+114)	(117+118)/(113+114) Count	(117+118)/(113+114) Variability [%]	(119+121)/(113+114)	(119+121)/(113+114) Count	(119+121)/(113+114) Variability [%]	114/113	114/113 Count	114/113 Variability [%]	115/116	115/116 Count	115/116 Variability [%]	117/118	117/118 Count	117/118 Variability [%]	119/121	119/121 Count	119/121 Variability [%]	IonScore	Exp Value	Charge	MH+ [Da]	ΔM [ppm]	RT [min]	# Missed Cleavages
	High	eVYEEAGVk	1	1	1	Q99MY2	N-Term(iTRAQ8plex); K9(iTRAQ8plex)	0	0.928536	1		0.912349	1		1.21106	1		0.779744	1		0.939011	1		0.905962	1		0.901455	1		31.3	0.00381775	2	1631.9	-3.21621	12.7486	0
Q62967	Diphosphomevalonate decarboxylase OS=Rattus norvegicus GN=Mvd PE=2 SV=1 - [ERG19_RAT]	22.03	1.5	1	1	1	1	0.840744	1		1.29771	1		1.61919	1		1.01448	1		1.10469	1		0.826915	1		0.944811	1		401	43.8755	7.07861
	A2	Sequence	# PSMs	# Proteins	# Protein Groups	Protein Group Accessions	Modifications	ΔCn	(115+116)/(113+114)	(115+116)/(113+114) Count	(115+116)/(113+114) Variability [%]	(117+118)/(113+114)	(117+118)/(113+114) Count	(117+118)/(113+114) Variability [%]	(119+121)/(113+114)	(119+121)/(113+114) Count	(119+121)/(113+114) Variability [%]	114/113	114/113 Count	114/113 Variability [%]	115/116	115/116 Count	115/116 Variability [%]	117/118	117/118 Count	117/118 Variability [%]	119/121	119/121 Count	119/121 Variability [%]	IonScore	Exp Value	Charge	MH+ [Da]	ΔM [ppm]	RT [min]	# Missed Cleavages
	High	dFTEDR	1	1	1	Q62967	N-Term(iTRAQ8plex)	0	0.840744	1		1.29771	1		1.61919	1		1.01448	1		1.10469	1		0.826915	1		0.944811	1		22.03	0.00720606	2	1086.53	-3.37825	16.8566	0
Q9ESW0	DNA damage-binding protein 1 OS=Rattus norvegicus GN=Ddb1 PE=2 SV=1 - [DDB1_RAT]	57.1693	0.79	1	1	1	2	1.01343	2	2.99777	1.02244	2	19.937	1.00374	2	6.04329	0.657921	2	15.3255	1.03329	2	25.1331	1.03718	2	2.17401	1.00079	2	17.3444	1140	126.781	5.33838
	A2	Sequence	# PSMs	# Proteins	# Protein Groups	Protein Group Accessions	Modifications	ΔCn	(115+116)/(113+114)	(115+116)/(113+114) Count	(115+116)/(113+114) Variability [%]	(117+118)/(113+114)	(117+118)/(113+114) Count	(117+118)/(113+114) Variability [%]	(119+121)/(113+114)	(119+121)/(113+114) Count	(119+121)/(113+114) Variability [%]	114/113	114/113 Count	114/113 Variability [%]	115/116	115/116 Count	115/116 Variability [%]	117/118	117/118 Count	117/118 Variability [%]	119/121	119/121 Count	119/121 Variability [%]	IonScore	Exp Value	Charge	MH+ [Da]	ΔM [ppm]	RT [min]	# Missed Cleavages
	High	eATADDLIk	2	1	1	Q9ESW0	N-Term(iTRAQ8plex); K9(iTRAQ8plex)	0	1.01343	2	2.99777	1.02244	2	19.937	1.00374	2	6.04329	0.657921	2	15.3255	1.03329	2	25.1331	1.03718	2	2.17401	1.00079	2	17.3444	44.99	0.00022187	3	1583.92	7.26846	16.1807	0
Q62724	DNA replication licensing factor MCM6 (Fragment) OS=Rattus norvegicus GN=Mcm6 PE=2 SV=2 - [MCM6_RAT]	35.3404	1.38	1	1	1	2	0.550633	2	2.74936	0.175089	2	3.69348	0.209615	2	1.65614	0.968621	2	2.59981	0.930147	2	1.19676	0.959858	2	16.3857	0.663701	2	17.5906	507	57.3337	5.10986
	A2	Sequence	# PSMs	# Proteins	# Protein Groups	Protein Group Accessions	Modifications	ΔCn	(115+116)/(113+114)	(115+116)/(113+114) Count	(115+116)/(113+114) Variability [%]	(117+118)/(113+114)	(117+118)/(113+114) Count	(117+118)/(113+114) Variability [%]	(119+121)/(113+114)	(119+121)/(113+114) Count	(119+121)/(113+114) Variability [%]	114/113	114/113 Count	114/113 Variability [%]	115/116	115/116 Count	115/116 Variability [%]	117/118	117/118 Count	117/118 Variability [%]	119/121	119/121 Count	119/121 Variability [%]	IonScore	Exp Value	Charge	MH+ [Da]	ΔM [ppm]	RT [min]	# Missed Cleavages
	High	iEESIDR	2	1	1	Q62724	N-Term(iTRAQ8plex)	0	0.550633	2	2.74936	0.175089	2	3.69348	0.209615	2	1.65614	0.968621	2	2.59981	0.930147	2	1.19676	0.959858	2	16.3857	0.663701	2	17.5906	27.6	0.00703809	2	1165.63	-7.95654	13.7697	0
Q9WUL0	DNA topoisomerase 1 OS=Rattus norvegicus GN=Top1 PE=2 SV=1 - [TOP1_RAT]	24.42	0.91	1	1	1	1	1.00275	1		0.609265	1		0.967752	1		0.837943	1		0.866019	1		0.66966	1		1.14271	1		767	90.7029	9.31982
	A2	Sequence	# PSMs	# Proteins	# Protein Groups	Protein Group Accessions	Modifications	ΔCn	(115+116)/(113+114)	(115+116)/(113+114) Count	(115+116)/(113+114) Variability [%]	(117+118)/(113+114)	(117+118)/(113+114) Count	(117+118)/(113+114) Variability [%]	(119+121)/(113+114)	(119+121)/(113+114) Count	(119+121)/(113+114) Variability [%]	114/113	114/113 Count	114/113 Variability [%]	115/116	115/116 Count	115/116 Variability [%]	117/118	117/118 Count	117/118 Variability [%]	119/121	119/121 Count	119/121 Variability [%]	IonScore	Exp Value	Charge	MH+ [Da]	ΔM [ppm]	RT [min]	# Missed Cleavages
	High	dQLADAR	1	1	1	Q9WUL0	N-Term(iTRAQ8plex)	0	1.00275	1		0.609265	1		0.967752	1		0.837943	1		0.866019	1		0.66966	1		1.14271	1		24.42	0.00849313	2	1092.59	-2.43135	15.8351	0
P41516	DNA topoisomerase 2-alpha OS=Rattus norvegicus GN=Top2a PE=2 SV=1 - [TOP2A_RAT]	24.11	0.52	1	1	1	1	0.639325	1		0.290916	1		0.388263	1		0.747335	1		0.852223	1		0.732273	1		1.09479	1		1526	173.112	8.73389
	A2	Sequence	# PSMs	# Proteins	# Protein Groups	Protein Group Accessions	Modifications	ΔCn	(115+116)/(113+114)	(115+116)/(113+114) Count	(115+116)/(113+114) Variability [%]	(117+118)/(113+114)	(117+118)/(113+114) Count	(117+118)/(113+114) Variability [%]	(119+121)/(113+114)	(119+121)/(113+114) Count	(119+121)/(113+114) Variability [%]	114/113	114/113 Count	114/113 Variability [%]	115/116	115/116 Count	115/116 Variability [%]	117/118	117/118 Count	117/118 Variability [%]	119/121	119/121 Count	119/121 Variability [%]	IonScore	Exp Value	Charge	MH+ [Da]	ΔM [ppm]	RT [min]	# Missed Cleavages
	High	fLYDDNQR	1	1	1	P41516	N-Term(iTRAQ8plex)	0	0.639325	1		0.290916	1		0.388263	1		0.747335	1		0.852223	1		0.732273	1		1.09479	1		24.11	0.00562818	2	1374.7	0.22338	17.963	0
P43138	DNA-(apurinic or apyrimidinic site) lyase OS=Rattus norvegicus GN=Apex1 PE=2 SV=2 - [APEX1_RAT]	53.41	4.73	1	1	1	1	1.12568	1		1.07916	1		1.51856	1		1.16216	1		0.972589	1		1.18151	1		0.86312	1		317	35.5161	7.91357
	A2	Sequence	# PSMs	# Proteins	# Protein Groups	Protein Group Accessions	Modifications	ΔCn	(115+116)/(113+114)	(115+116)/(113+114) Count	(115+116)/(113+114) Variability [%]	(117+118)/(113+114)	(117+118)/(113+114) Count	(117+118)/(113+114) Variability [%]	(119+121)/(113+114)	(119+121)/(113+114) Count	(119+121)/(113+114) Variability [%]	114/113	114/113 Count	114/113 Variability [%]	115/116	115/116 Count	115/116 Variability [%]	117/118	117/118 Count	117/118 Variability [%]	119/121	119/121 Count	119/121 Variability [%]	IonScore	Exp Value	Charge	MH+ [Da]	ΔM [ppm]	RT [min]	# Missed Cleavages
	High	vSYGIGEEEHDQEGR	1	1	1	P43138	N-Term(iTRAQ8plex)	0	1.12568	1		1.07916	1		1.51856	1		1.16216	1		0.972589	1		1.18151	1		0.86312	1		53.41	5.01641e-06	2	2008.93	-9.57464	12.5349	0
Q62764	DNA-binding protein A OS=Rattus norvegicus GN=Csda PE=2 SV=1 - [DBPA_RAT]	83.15	5.26	1	1	1	1	1.07328	1		1.10462	1		0.971169	1		0.92483	1		0.945361	1		1.00374	1		0.771897	1		361	38.8284	9.68604
	A2	Sequence	# PSMs	# Proteins	# Protein Groups	Protein Group Accessions	Modifications	ΔCn	(115+116)/(113+114)	(115+116)/(113+114) Count	(115+116)/(113+114) Variability [%]	(117+118)/(113+114)	(117+118)/(113+114) Count	(117+118)/(113+114) Variability [%]	(119+121)/(113+114)	(119+121)/(113+114) Count	(119+121)/(113+114) Variability [%]	114/113	114/113 Count	114/113 Variability [%]	115/116	115/116 Count	115/116 Variability [%]	117/118	117/118 Count	117/118 Variability [%]	119/121	119/121 Count	119/121 Variability [%]	IonScore	Exp Value	Charge	MH+ [Da]	ΔM [ppm]	RT [min]	# Missed Cleavages
	High	gAEAANVTGPDGVPVEGSR	1	1	1	Q62764	N-Term(iTRAQ8plex)	0	1.07328	1		1.10462	1		0.971169	1		0.92483	1		0.945361	1		1.00374	1		0.771897	1		83.15	1.67039e-08	2	2087.05	-7.46988	15.2072	0
Q6TUG0	DnaJ homolog subfamily B member 11 OS=Rattus norvegicus GN=Dnajb11 PE=2 SV=1 - [DJB11_RAT]	41.5657	3.07	1	1	1	2	1.19723	2	4.50124	0.937567	2	8.85955	0.837356	2	14.6176	1.08451	2	16.862	0.969451	2	16.552	1.26444	2	27.1912	1.02135	2	6.8384	358	40.4697	6.31592
	A2	Sequence	# PSMs	# Proteins	# Protein Groups	Protein Group Accessions	Modifications	ΔCn	(115+116)/(113+114)	(115+116)/(113+114) Count	(115+116)/(113+114) Variability [%]	(117+118)/(113+114)	(117+118)/(113+114) Count	(117+118)/(113+114) Variability [%]	(119+121)/(113+114)	(119+121)/(113+114) Count	(119+121)/(113+114) Variability [%]	114/113	114/113 Count	114/113 Variability [%]	115/116	115/116 Count	115/116 Variability [%]	117/118	117/118 Count	117/118 Variability [%]	119/121	119/121 Count	119/121 Variability [%]	IonScore	Exp Value	Charge	MH+ [Da]	ΔM [ppm]	RT [min]	# Missed Cleavages
	High	tLEVEIEPGVR	2	1	1	Q6TUG0	N-Term(iTRAQ8plex)	0	1.19723	2	4.50124	0.937567	2	8.85955	0.837356	2	14.6176	1.08451	2	16.862	0.969451	2	16.552	1.26444	2	27.1912	1.02135	2	6.8384	30.92	0.00481412	2	1545.89	6.03663	12.3856	0
Q6AYU3	DnaJ homolog subfamily B member 6 OS=Rattus norvegicus GN=Dnajb6 PE=1 SV=1 - [DNJB6_RAT]	50.6293	1.96	1	1	1	2	0.974037	2	4.1469	0.685557	2	9.39391	0.967316	2	1.44874	1.01213	2	7.92727	0.90421	2	6.92452	1.00071	2	16.5315	0.983711	2	0.221649	357	38.8984	9.36377
	A2	Sequence	# PSMs	# Proteins	# Protein Groups	Protein Group Accessions	Modifications	ΔCn	(115+116)/(113+114)	(115+116)/(113+114) Count	(115+116)/(113+114) Variability [%]	(117+118)/(113+114)	(117+118)/(113+114) Count	(117+118)/(113+114) Variability [%]	(119+121)/(113+114)	(119+121)/(113+114) Count	(119+121)/(113+114) Variability [%]	114/113	114/113 Count	114/113 Variability [%]	115/116	115/116 Count	115/116 Variability [%]	117/118	117/118 Count	117/118 Variability [%]	119/121	119/121 Count	119/121 Variability [%]	IonScore	Exp Value	Charge	MH+ [Da]	ΔM [ppm]	RT [min]	# Missed Cleavages
	High	nPDDVFR	2	1	1	Q6AYU3	N-Term(iTRAQ8plex)	0	0.974037	2	4.1469	0.685557	2	9.39391	0.967316	2	1.44874	1.01213	2	7.92727	0.90421	2	6.92452	1.00071	2	16.5315	0.983711	2	0.221649	36.31	0.000456073	2	1166.6	-8.36752	11.6951	0
Q641Y0	Dolichyl-diphosphooligosaccharide--protein glycosyltransferase 48 kDa subunit OS=Rattus norvegicus GN=Ddost PE=2 SV=1 - [OST48_RAT]	31.58	2.49	1	1	1	1	1.16766	1		1.0837	1		1.09314	1		0.955308	1		1.01236	1		1.03783	1		1.03543	1		441	48.865	5.97314
	A2	Sequence	# PSMs	# Proteins	# Protein Groups	Protein Group Accessions	Modifications	ΔCn	(115+116)/(113+114)	(115+116)/(113+114) Count	(115+116)/(113+114) Variability [%]	(117+118)/(113+114)	(117+118)/(113+114) Count	(117+118)/(113+114) Variability [%]	(119+121)/(113+114)	(119+121)/(113+114) Count	(119+121)/(113+114) Variability [%]	114/113	114/113 Count	114/113 Variability [%]	115/116	115/116 Count	115/116 Variability [%]	117/118	117/118 Count	117/118 Variability [%]	119/121	119/121 Count	119/121 Variability [%]	IonScore	Exp Value	Charge	MH+ [Da]	ΔM [ppm]	RT [min]	# Missed Cleavages
	High	tLVLLDNLNVR	1	1	1	Q641Y0	N-Term(iTRAQ8plex)	0	1.16766	1		1.0837	1		1.09314	1		0.955308	1		1.01236	1		1.03783	1		1.03543	1		31.58	0.00385738	2	1573.97	7.29153	6.25659	0
P07153	Dolichyl-diphosphooligosaccharide--protein glycosyltransferase subunit 1 OS=Rattus norvegicus GN=Rpn1 PE=2 SV=1 - [RPN1_RAT]	234.828	8.26	1	5	5	9	1.108	9	8.25381	1.23986	9	3.57004	1.20766	9	10.0656	0.923625	9	3.48535	0.970226	9	8.81393	1.0977	9	4.95857	0.999291	9	8.93446	605	68.2616	6.50732
	A2	Sequence	# PSMs	# Proteins	# Protein Groups	Protein Group Accessions	Modifications	ΔCn	(115+116)/(113+114)	(115+116)/(113+114) Count	(115+116)/(113+114) Variability [%]	(117+118)/(113+114)	(117+118)/(113+114) Count	(117+118)/(113+114) Variability [%]	(119+121)/(113+114)	(119+121)/(113+114) Count	(119+121)/(113+114) Variability [%]	114/113	114/113 Count	114/113 Variability [%]	115/116	115/116 Count	115/116 Variability [%]	117/118	117/118 Count	117/118 Variability [%]	119/121	119/121 Count	119/121 Variability [%]	IonScore	Exp Value	Charge	MH+ [Da]	ΔM [ppm]	RT [min]	# Missed Cleavages
	High	sEDILDYGPFk	2	1	1	P07153	N-Term(iTRAQ8plex); K11(iTRAQ8plex)	0	1.15117	2	5.6718	1.18485	2	6.73546	1.08155	2	18.4287	0.796757	2	18.5795	0.939481	2	4.77683	1.09478	2	0.394932	0.856434	2	18.6371	59.07	6.75144e-06	2	1892.02	-4.78001	11.9538	0
	High	nIQVDSPYDISR	2	1	1	P07153	N-Term(iTRAQ8plex)	0	1.1712	2	3.19847	1.29237	2	3.99547	1.31903	2	4.74595	0.899972	2	0.391031	0.987992	2	11.5252	1.18373	2	16.2481	1.09202	2	1.6529	53.69	1.79576e-05	2	1710.91	7.18782	16.3282	0
	High	iDHILDAL	3	1	1	P07153	N-Term(iTRAQ8plex)	0	1.08043	3	8.7991	1.23023	3	2.4142	1.10532	3	5.88835	0.94295	3	3.07071	0.955437	3	2.85631	1.07293	3	5.53813	0.999291	3	1.00437	44.2	0.00022051	2	1213.7	-8.55986	6.85081	0
	High	dTYIENEk	1	1	1	P07153	N-Term(iTRAQ8plex); K8(iTRAQ8plex)	0	1.0481	1		1.37294	1		1.29228	1		0.927774	1		0.981238	1		1.26882	1		0.971205	1		35.71	0.000980151	2	1619.87	-3.60267	14.4767	0
	High	dIPAYSQDTFk	1	1	1	P07153	N-Term(iTRAQ8plex); K11(iTRAQ8plex)	0	1.06089	1		1.18219	1		1.14177	1		0.984303	1		1.26267	1		1.26098	1		1.11587	1		28.79	0.00772958	2	1893.02	-1.7471	14.2132	0
P25235	Dolichyl-diphosphooligosaccharide--protein glycosyltransferase subunit 2 OS=Rattus norvegicus GN=Rpn2 PE=2 SV=2 - [RPN2_RAT]	135.406	1.9	1	1	1	4	1.12621	2	3.33965	1.05715	2	5.76184	1.26275	2	7.30329	1.00252	2	2.93317	0.849105	2	6.06071	1.0517	2	8.99509	1.01935	2	2.07147	631	69.035	5.97314
	A2	Sequence	# PSMs	# Proteins	# Protein Groups	Protein Group Accessions	Modifications	ΔCn	(115+116)/(113+114)	(115+116)/(113+114) Count	(115+116)/(113+114) Variability [%]	(117+118)/(113+114)	(117+118)/(113+114) Count	(117+118)/(113+114) Variability [%]	(119+121)/(113+114)	(119+121)/(113+114) Count	(119+121)/(113+114) Variability [%]	114/113	114/113 Count	114/113 Variability [%]	115/116	115/116 Count	115/116 Variability [%]	117/118	117/118 Count	117/118 Variability [%]	119/121	119/121 Count	119/121 Variability [%]	IonScore	Exp Value	Charge	MH+ [Da]	ΔM [ppm]	RT [min]	# Missed Cleavages
	High	nIVEEIEDLVAR	4	1	1	P25235	N-Term(iTRAQ8plex)	0	1.12621	2	3.33965	1.05715	2	5.76184	1.26275	2	7.30329	1.00252	2	2.93317	0.849105	2	6.06071	1.0517	2	8.99509	1.01935	2	2.07147	60.11	6.14243e-06	3	1703.95	-0.762212	13.8185	0
P55266	Double-stranded RNA-specific adenosine deaminase OS=Rattus norvegicus GN=Adar PE=2 SV=1 - [DSRAD_RAT]	40.1	0.85	1	1	1	1	1.16019	1		0.844491	1		2.01741	1		1.09432	1		0.890991	1		0.701646	1		0.959724	1		1175	129.83	8.67529
	A2	Sequence	# PSMs	# Proteins	# Protein Groups	Protein Group Accessions	Modifications	ΔCn	(115+116)/(113+114)	(115+116)/(113+114) Count	(115+116)/(113+114) Variability [%]	(117+118)/(113+114)	(117+118)/(113+114) Count	(117+118)/(113+114) Variability [%]	(119+121)/(113+114)	(119+121)/(113+114) Count	(119+121)/(113+114) Variability [%]	114/113	114/113 Count	114/113 Variability [%]	115/116	115/116 Count	115/116 Variability [%]	117/118	117/118 Count	117/118 Variability [%]	119/121	119/121 Count	119/121 Variability [%]	IonScore	Exp Value	Charge	MH+ [Da]	ΔM [ppm]	RT [min]	# Missed Cleavages
	High	dGNAFEDGLR	1	1	1	P55266	N-Term(iTRAQ8plex)	0	1.16019	1		0.844491	1		2.01741	1		1.09432	1		0.890991	1		0.701646	1		0.959724	1		40.1	0.000229651	2	1397.69	-5.91364	14.795	0
Q07266	Drebrin OS=Rattus norvegicus GN=Dbn1 PE=2 SV=3 - [DREB_RAT]	101.119	4.24	1	2	2	2	1.08954	2	12.7766	0.992974	2	22.1438	0.999429	2	19.759	0.973915	2	10.3443	1.03121	2	4.22231	1.16099	2	15.0846	1.01494	2	13.2126	707	77.4242	4.50049
	A2	Sequence	# PSMs	# Proteins	# Protein Groups	Protein Group Accessions	Modifications	ΔCn	(115+116)/(113+114)	(115+116)/(113+114) Count	(115+116)/(113+114) Variability [%]	(117+118)/(113+114)	(117+118)/(113+114) Count	(117+118)/(113+114) Variability [%]	(119+121)/(113+114)	(119+121)/(113+114) Count	(119+121)/(113+114) Variability [%]	114/113	114/113 Count	114/113 Variability [%]	115/116	115/116 Count	115/116 Variability [%]	117/118	117/118 Count	117/118 Variability [%]	119/121	119/121 Count	119/121 Variability [%]	IonScore	Exp Value	Charge	MH+ [Da]	ΔM [ppm]	RT [min]	# Missed Cleavages
	High	sPSDSSTASTPITEQIER	1	1	1	Q07266	N-Term(iTRAQ8plex)	0	0.99993	1		0.856737	1		0.875842	1		0.908449	1		1.00227	1		1.2846	1		0.928763	1		76	9.16839e-08	2	2210.1	-5.68217	14.1124	0
	High	lELLAAYEEVIR	1	1	1	Q07266	N-Term(iTRAQ8plex)	0	1.18719	1		1.15088	1		1.14046	1		1.0441	1		1.06099	1		1.04928	1		1.10911	1		44.35	0.000222206	2	1723	3.57201	7.6967	0
Q9JHL4	Drebrin-like protein OS=Rattus norvegicus GN=Dbnl PE=1 SV=1 - [DBNL_RAT]	55.5422	2.52	1	1	1	2	1.19839	2	3.33876	1.20526	2	9.48526	1.04202	2	4.9234	0.911995	2	7.80194	1.02773	2	0.810289	0.956727	2	8.66398	0.989878	2	11.3613	436	48.5825	4.91943
[truncated: 2,885 more rows]

## Sheet: SCX-RPLC identification
Accession	Description	Score	Coverage	# Proteins	# Unique Peptides	# Peptides	# PSMs	(115+116)/(113+114)	(115+116)/(113+114) Count	(115+116)/(113+114) Variability [%]	(117+118)/(113+114)	(117+118)/(113+114) Count	(117+118)/(113+114) Variability [%]	(119+121)/(113+114)	(119+121)/(113+114) Count	(119+121)/(113+114) Variability [%]	114/113	114/113 Count	114/113 Variability [%]	115/116	115/116 Count	115/116 Variability [%]	117/118	117/118 Count	117/118 Variability [%]	119/121	119/121 Count	119/121 Variability [%]	# AAs	MW [kDa]	calc. pI
[truncated: 6,453 more rows]

[truncated: 2 more sheets: HPLC-CIEF quantification , SCX-RPLC quantification]
